# Supplementary material for: Decreased mitochondrial NAD+ in WRN deficient cells links to dysfunctional proliferation
Source: Aging (Albany NY). 2025 Apr 2;17(4):937–59. doi: 10.18632/aging.206236 (PMC12074813; doi:10.18632/aging.206236)
Supplement: Supplementary File 1 [file aging-17-206236-s003.xlsx]

## Sheet: fmpk_NR 1 Day
Supplementary File 1. Full list fpkm values and read counts of MSCs WT (Veh), WRN-/- (Veh) or WRN-/- (NR) used for gene-set-enrichment analysis, and up- or down-regulated genes (DEGs) related to NAD+ metabolism.
gene_id	WTD1_1	WTD1_2	WTD1_3	KOW_D1_1	KOW_D1_2	KOW_D1_3	NRD1_1	NRD1_2	NRD1_3	gene_name	gene_chr	gene_start	gene_end	gene_strand	gene_length	gene_biotype	gene_description	tf_family
ENSG00000132383	29.0727	27.3809	29.2708	39.5612	39.5164	38.4514	29.072	29.3105	27.8879	RPA1	17	1829702	1900082	+	5492	protein_coding	replication protein A1 [Source:HGNC Symbol;Acc:HGNC:10289]	-
ENSG00000155438	28.942	30.3599	32.5596	42.3794	36.4893	39.5615	27.8183	33.0254	29.8849	NIFK	2	121726945	121736923	-	2447	protein_coding	nucleolar protein interacting with the FHA domain of MKI67 [Source:HGNC Symbol;Acc:HGNC:17838]	-
ENSG00000278990	0	0	0	0	0	0	0	0	0	AL132796.3	14	98916902	98917801	-	900	TEC	TEC	-
ENSG00000241524	0	0	0	0	0	0	0	0	0	RN7SL632P	2	60831664	60831929	-	266	misc_RNA	RNA, 7SL, cytoplasmic 632, pseudogene [Source:HGNC Symbol;Acc:HGNC:46648]	-
ENSG00000163467	0.906599	0.789682	0.822421	0.604206	1.10553	1.22607	0.414316	1.04198	1.10096	TSACC	1	156337314	156346995	+	1115	protein_coding	TSSK6 activating cochaperone [Source:HGNC Symbol;Acc:HGNC:30636]	-
ENSG00000237440	1.93224	1.39056	1.94759	2.31135	1.766	1.65275	1.22266	1.28122	1.80499	ZNF737	19	20535825	20565809	-	3539	protein_coding	zinc finger protein 737 [Source:HGNC Symbol;Acc:HGNC:32468]	zf-C2H2
ENSG00000188997	12.0135	11.3925	12.1578	13.5593	12.6775	11.6174	10.0506	8.53688	10.0458	KCTD21	11	78171249	78188822	-	4164	protein_coding	potassium channel tetramerization domain containing 21 [Source:HGNC Symbol;Acc:HGNC:27452]	-
ENSG00000168589	0.0954664	0.461971	0.0962247	0	0	0	0.349025	0	0.267537	DYNLRB2	16	80540734	80550760	+	1464	protein_coding	dynein light chain roadblock-type 2 [Source:HGNC Symbol;Acc:HGNC:15467]	-
ENSG00000223335	0	0	0	0	0	0	0	0	0	RNU6-603P	6	32352877	32352983	+	107	snRNA	RNA, U6 small nuclear 603, pseudogene [Source:HGNC Symbol;Acc:HGNC:47566]	-
ENSG00000161542	23.2904	22.5853	22.5512	25.3098	24.5562	24.7599	24.2627	21.9557	25.2256	PRPSAP1	17	76309486	76384521	-	6939	protein_coding	phosphoribosyl pyrophosphate synthetase associated protein 1 [Source:HGNC Symbol;Acc:HGNC:9466]	-
ENSG00000201500	0	0	0	0	0	0	0	0	0	RF00181	14	100977389	100977466	+	78	snoRNA		-
ENSG00000257948	0	0	0	0	0	0	0	0	0	AC068993.2	12	78804348	78808499	+	395	lincRNA	novel transcript	-
ENSG00000260786	0	0	0	0	0	0	0	0	0	AC108099.1	5	42188266	42191523	+	3258	lincRNA	novel transcript	-
ENSG00000144648	0	0.0440625	0.137668	0	0.128117	0	0.0416122	0.0872101	0.212646	ACKR2	3	42804752	42887974	+	5457	protein_coding	atypical chemokine receptor 2 [Source:HGNC Symbol;Acc:HGNC:1565]	-
ENSG00000014641	165.915	167.845	176.742	179.151	169.835	170.878	169.002	196.664	183.504	MDH1	2	63588609	63607197	+	4990	protein_coding	malate dehydrogenase 1 [Source:HGNC Symbol;Acc:HGNC:6970]	-
ENSG00000260966	0.25533	0.405266	0.339713	0.090755	0.153282	0.202578	0.32672	0.332586	0.391163	AP001486.2	11	103050687	103055799	-	5113	sense_overlapping	novel transcript, overlapping to DCUN1D5	-
ENSG00000263716	0	0	0	0	0	0	0	0	0	SLC25A51P2	18	7134931	7135819	+	889	processed_pseudogene	solute carrier family 25 member 51 pseudogene 2 [Source:HGNC Symbol;Acc:HGNC:23327]	-
ENSG00000229051	0	0	0.0504649	0	0	0	0	0	0	LINC01788	1	70706453	70786468	+	2086	lincRNA	long intergenic non-protein coding RNA 1788 [Source:HGNC Symbol;Acc:HGNC:52577]	-
ENSG00000211786	0	0	0	0	0	0	0	0	0	TRAV8-2	14	21846537	21847221	+	566	TR_V_gene	T cell receptor alpha variable 8-2 [Source:HGNC Symbol;Acc:HGNC:12147]	-
ENSG00000244297	0	0	0	0	0	0	0	0	0	RN7SL465P	6	38744086	38744386	+	301	misc_RNA	RNA, 7SL, cytoplasmic 465, pseudogene [Source:HGNC Symbol;Acc:HGNC:46481]	-
ENSG00000237939	0	0	0	0	0	0	0	0	0	AC097523.2	2	138307319	138307970	+	652	processed_pseudogene	isopentenyl-diphosphate delta isomerase 1 (IDI1) pseudogene	-
ENSG00000158715	1.55127	1.9727	2.50902	3.14563	3.23171	2.45569	1.51678	1.76219	1.43226	SLC45A3	1	205657851	205680459	-	3702	protein_coding	solute carrier family 45 member 3 [Source:HGNC Symbol;Acc:HGNC:8642]	-
ENSG00000186594	56.7019	62.8295	57.9053	70.2985	68.0925	64.1011	61.4459	64.6488	66.3522	MIR22HG	17	1711493	1717174	-	2986	lincRNA	MIR22 host gene [Source:HGNC Symbol;Acc:HGNC:28219]	-
ENSG00000240014	0	0	0	0	0	0	0	0	0	RN7SL254P	4	147808926	147809209	+	284	misc_RNA	RNA, 7SL, cytoplasmic 254, pseudogene [Source:HGNC Symbol;Acc:HGNC:46270]	-
ENSG00000253139	0.297268	0	0.199753	0.55032	0.185895	0.536026	0.271703	0.0949051	0	AC013644.1	8	56536758	56540497	-	861	lincRNA	novel transcript	-
ENSG00000234229	0	0	0	0	0	0	0	0	0	LINC01505	9	106664754	106702662	+	686	lincRNA	long intergenic non-protein coding RNA 1505 [Source:HGNC Symbol;Acc:HGNC:51186]	-
ENSG00000127311	0.495761	0.40599	0.435635	0.268274	0.321945	0.275059	0.255609	0.1461	0.284991	HELB	12	66302545	66347645	+	13796	protein_coding	DNA helicase B [Source:HGNC Symbol;Acc:HGNC:17196]	-
ENSG00000246263	0.806771	0.851792	0.480515	0.733194	0.756764	0.760437	1.00553	0.702458	0.753638	UBR5-AS1	8	102239394	102253333	+	2355	antisense	UBR5 antisense RNA 1 [Source:HGNC Symbol;Acc:HGNC:51661]	-
ENSG00000279642	0.168452	0	0	0	0	0	0	0	0	AL023973.1	22	44486295	44486914	-	620	TEC	TEC	-
ENSG00000178404	0.942925	0.869125	1.7198	1.04736	1.26354	1.17399	0.492477	0.387046	0.377497	CEP295NL	17	78870910	78903217	-	2758	protein_coding	CEP295 N-terminal like [Source:HGNC Symbol;Acc:HGNC:44659]	-
ENSG00000233403	0	0	0	0	0	0	0	0	0	AC121342.1	X	25878339	25893544	+	550	lincRNA	novel transcript	-
ENSG00000251099	0	0	0	0	0	0	0	0	0	AC008967.1	5	111572236	111572398	+	163	processed_pseudogene	high-mobility group nucleosome binding domain 1 (HMGN1) pseudogene	-
ENSG00000177535	0	0	0	0	0	0	0	0	0	OR2B11	1	247449118	247458105	-	6414	protein_coding	olfactory receptor family 2 subfamily B member 11 [Source:HGNC Symbol;Acc:HGNC:31249]	-
ENSG00000151239	102.916	101.004	108.343	136.76	139.104	141.771	105.283	104.036	100.191	TWF1	12	43793723	43806375	-	3932	protein_coding	twinfilin actin binding protein 1 [Source:HGNC Symbol;Acc:HGNC:9620]	-
ENSG00000164398	0	0	0	0	0	0	0	0	0.0244149	ACSL6	5	131949973	132012243	-	13013	protein_coding	acyl-CoA synthetase long chain family member 6 [Source:HGNC Symbol;Acc:HGNC:16496]	-
ENSG00000216368	0	0	0	0	0	0	0	0	0	AL136226.1	6	10118452	10119253	+	802	processed_pseudogene	ribosomal protein L7A (RPL7A) pseudogene	-
ENSG00000270624	0	0	0	0	0	0	0	0	0	AC008555.4	19	34866352	34866919	+	568	processed_pseudogene	ABO blood group (transferase A, alpha 1-3-N-acetylgalactosaminyltransferase; transferase B, alpha 1-3-galactosyltransferase) pseudogene	-
ENSG00000275126	0	0	0	0	0	0	0	0	0	HIST1H4L	6	27873199	27873510	-	312	protein_coding	histone cluster 1 H4 family member l [Source:HGNC Symbol;Acc:HGNC:4791]	-
ENSG00000197472	0.0439194	0.085012	0.0442682	0.292702	0.329576	0.197985	0.0401423	0	0	ZNF695	1	246945547	247008093	-	3756	protein_coding	zinc finger protein 695 [Source:HGNC Symbol;Acc:HGNC:30954]	zf-C2H2
ENSG00000111786	70.4102	74.7404	70.1641	87.5538	78.9641	88.2715	76.255	83.5084	70.8224	SRSF9	12	120461668	120469793	-	3744	protein_coding	serine and arginine rich splicing factor 9 [Source:HGNC Symbol;Acc:HGNC:10791]	-
ENSG00000249065	0	0	0	0	0	0	0	0	0	PCNAP1	4	99160514	99161645	-	1132	transcribed_processed_pseudogene	proliferating cell nuclear antigen pseudogene 1 [Source:HGNC Symbol;Acc:HGNC:8732]	-
ENSG00000157343	0.416097	0.352368	0.524252	0.231091	0.341517	0.0468934	0.237695	0.199263	0.388693	ARMC12	6	35737032	35749079	+	1418	protein_coding	armadillo repeat containing 12 [Source:HGNC Symbol;Acc:HGNC:21099]	-
ENSG00000184208	7.37756	6.3371	6.14529	5.79036	6.63263	5.88715	6.62768	5.90851	6.16712	C22orf46	22	41688939	41698136	+	5341	protein_coding	chromosome 22 open reading frame 46 [Source:HGNC Symbol;Acc:HGNC:26294]	-
ENSG00000237185	0	0	0	0	0	0	0	0	0	VN1R66P	16	31648307	31649222	+	916	unprocessed_pseudogene	vomeronasal 1 receptor 66 pseudogene [Source:HGNC Symbol;Acc:HGNC:37386]	-
ENSG00000254814	0	0	0	0	0	0	0	0	0	AP003031.1	11	75800877	75803415	-	758	antisense	novel transcript	-
ENSG00000233559	0.226201	0.156373	0.227998	0.358934	0.363737	0.553551	0.118142	0.123799	0.120745	LINC00513	7	130853720	130928649	+	1616	lincRNA	long intergenic non-protein coding RNA 513 [Source:HGNC Symbol;Acc:HGNC:43566]	-
ENSG00000125945	3.34847	3.62651	2.87952	2.89281	2.74207	2.83923	3.20624	2.6471	3.42584	ZNF436	1	23359448	23369442	-	4392	protein_coding	zinc finger protein 436 [Source:HGNC Symbol;Acc:HGNC:20814]	zf-C2H2
ENSG00000279083	0	0	0	0	0	0	0	0	0	AL160274.1	9	35360540	35362054	-	1515	TEC	TEC	-
ENSG00000230381	0	0	0	0	0	0	0	0	0	AL136376.1	1	116429049	116433368	-	515	lincRNA	novel transcript	-
ENSG00000240540	0	0	0	0	0	0	0	0	0	RPL3P9	8	79571153	79572335	-	1183	processed_pseudogene	ribosomal protein L3 pseudogene 9 [Source:HGNC Symbol;Acc:HGNC:36839]	-
ENSG00000158955	0	0	0	0	0	0	0	0	0	WNT9B	17	46833201	46886730	+	3313	protein_coding	Wnt family member 9B [Source:HGNC Symbol;Acc:HGNC:12779]	-
ENSG00000240767	0	0	0	0	0	0	0	0	0	RN7SL288P	13	46169458	46169748	-	291	misc_RNA	RNA, 7SL, cytoplasmic 288, pseudogene [Source:HGNC Symbol;Acc:HGNC:46304]	-
ENSG00000247151	0.0248786	0	0	0.027634	0.0233365	0	0	0	0	CSTF3-DT	11	33161657	33191598	+	4012	processed_transcript	CSTF3 divergent transcript [Source:HGNC Symbol;Acc:HGNC:27882]	-
ENSG00000153292	0	0	0	0	0	0	0	0	0	ADGRF1	6	46997703	47042363	-	12401	protein_coding	adhesion G protein-coupled receptor F1 [Source:HGNC Symbol;Acc:HGNC:18990]	-
ENSG00000011007	21.8937	19.0229	22.5601	26.507	28.5797	27.2709	20.1693	21.5277	18.5965	ELOA	1	23743155	23762059	+	5391	protein_coding	elongin A [Source:HGNC Symbol;Acc:HGNC:11620]	-
ENSG00000214842	0	0	0	0	0	0	0	0	0	RAD51AP2	2	17510584	17518439	-	3724	protein_coding	RAD51 associated protein 2 [Source:HGNC Symbol;Acc:HGNC:34417]	-
ENSG00000244036	0	0	0	0	0	0	0	0	0	AC073320.1	7	129953234	130026989	+	1533	antisense	novel transcript, antisense to ZC3HC1	-
ENSG00000285538	0	0	0	0	0	0	0	0	0	AC092134.3	16	77752372	77756681	+	1094	lincRNA	novel transcript	-
ENSG00000236021	0.270571	0	0	0	0.1692	0.0813142	0.0824338	0.0863817	0.168501	AL359265.3	1	176207648	176229330	+	579	antisense	novel transcript	-
ENSG00000218173	0	0	0	0	0	0	0	0	0	AL356967.1	6	104687241	104687671	+	431	processed_pseudogene	novel pseudogene	-
ENSG00000167965	57.2168	53.7636	58.7576	57.8949	55.0488	52.3809	53.8185	54.8945	56.8348	MLST8	16	2204248	2209416	+	4323	protein_coding	MTOR associated protein, LST8 homolog [Source:HGNC Symbol;Acc:HGNC:24825]	-
ENSG00000276706	0	0	0	0	0	0	0	0	0	RF01992	2	144705217	144705419	+	203	misc_RNA		-
ENSG00000275630	0	0.177956	0.185334	0.204239	0	0.331556	0.336121	0	0.171764	AC004816.2	14	70822004	70823984	+	284	lincRNA	novel transcript	-
ENSG00000242337	0	0.0621644	0	0.0713453	0	0.11582	0.0587075	0.123038	0.240005	TFP1	3	133661998	133754576	+	2318	transcribed_unprocessed_pseudogene	transferrin pseudogene 1 [Source:HGNC Symbol;Acc:HGNC:11759]	-
ENSG00000250170	0	0	0	0	0	0.0769297	0	0.0817238	0	RASA2-IT1	3	141525133	141526121	+	612	sense_intronic	RASA2 intronic transcript 1 [Source:HGNC Symbol;Acc:HGNC:41376]	-
ENSG00000237953	0	0	0	0	0	0	0	0	0	AC013267.1	2	24968958	24969224	-	267	processed_pseudogene	ribosomal protein S13 (RPS13) pseudogene	-
ENSG00000176920	0.577417	0.663617	0.982131	0.400855	0.846291	0.357906	0.461789	0.829551	0.471965	FUT2	19	48695971	48705950	+	3380	protein_coding	fucosyltransferase 2 [Source:HGNC Symbol;Acc:HGNC:4013]	-
ENSG00000259943	0.982728	0.524746	1.29794	1.20449	1.01717	1.61927	1.05308	0.843861	0.791385	AL050341.2	1	40256427	40257967	-	1541	antisense	novel transcript, antisense to ZMPSTE24	-
ENSG00000261103	0	0.0892927	0	0	0	0	0	0	0	AC009063.3	16	83710179	83717898	-	566	antisense	novel transcript, antisense to CDH13	-
ENSG00000162843	0.02852	0	0	0	0	0	0	0	0.0266417	WDR64	1	241652278	241802133	+	4939	protein_coding	WD repeat domain 64 [Source:HGNC Symbol;Acc:HGNC:26570]	-
ENSG00000200494	0	0	0	0	0	0	0	0	0	RF00019	20	16670641	16670742	-	102	misc_RNA		-
ENSG00000197619	2.35833	2.43293	2.74276	2.6771	2.26077	1.82249	2.43975	1.66303	2.22722	ZNF615	19	51991332	52008230	-	4898	protein_coding	zinc finger protein 615 [Source:HGNC Symbol;Acc:HGNC:24740]	zf-C2H2
ENSG00000229159	0	0	0	0	0	0	0	0	0	TSPY23P	Y	22183850	22186021	+	739	unprocessed_pseudogene	testis specific protein Y-linked 23, pseudogene [Source:HGNC Symbol;Acc:HGNC:38594]	-
ENSG00000257386	0	0	0	0	0	0	0	0	0	AC025257.1	12	74538145	74538633	-	375	antisense	novel transcript, antisense to ATXN7L3B	-
ENSG00000220635	0	0	0.0953531	0	0	0	0	0	0	KRASP1	6	54770583	54771134	+	552	processed_pseudogene	KRAS proto-oncogene, GTPase pseudogene 1 [Source:HGNC Symbol;Acc:HGNC:6406]	-
ENSG00000229145	0	0	0	0	0	0	0	0	0	ACTBP1	X	46288016	46289128	-	1113	processed_pseudogene	actin, beta pseudogene 1 [Source:HGNC Symbol;Acc:HGNC:134]	-
ENSG00000234577	0	0	0.0951807	0.734225	0.265732	0.170275	0	0	0	SYNE1-AS1	6	152380546	152381564	+	553	antisense	SYNE1 antisense RNA 1 [Source:HGNC Symbol;Acc:HGNC:40793]	-
ENSG00000243181	0.329811	0.319198	0.332431	0.610566	0.515614	0.297353	0.200965	0.315884	0.61618	AC087343.1	8	34874159	34874633	+	475	processed_pseudogene	ribosomal protein L21 (RPl21) pseudogene	-
ENSG00000234105	0	0	0	0	0	0	0	0	0	AC009468.2	7	53514992	53517116	-	366	lincRNA	novel transcript	-
ENSG00000274866	0	0	0	0	0	0	0	0	0	RF01973	11	1997484	1997552	+	69	misc_RNA		-
ENSG00000100299	52.3953	55.0509	50.8687	40.4858	38.6278	38.3283	50.1637	51.022	51.4983	ARSA	22	50622754	50628173	-	2932	protein_coding	arylsulfatase A [Source:HGNC Symbol;Acc:HGNC:713]	-
ENSG00000271081	0	0	0	0	0	0	0	0	0	AC009314.1	8	30754236	30754539	-	304	processed_pseudogene	chromosome 11 open reading frame 73 (C11orf73) pseudogene	-
ENSG00000253161	5.14633	5.05396	6.25516	8.82666	7.80893	9.82559	5.74134	6.45121	5.37297	LINC01605	8	37421341	37554183	-	1522	lincRNA	long intergenic non-protein coding RNA 1605 [Source:HGNC Symbol;Acc:HGNC:51654]	-
ENSG00000234436	0	0	0	0	0	0	0	0	0	AC245884.2	19	54301758	54306026	-	404	unprocessed_pseudogene	leukocyte immunoglobulin-like receptor, subfamily A pseudogene	-
ENSG00000227486	0.103714	0.0501883	0.261345	0	0.0486428	0.233768	0.0947948	0.149002	0.290651	AL445472.1	X	55908123	56015173	+	1007	lincRNA	novel transcript	-
ENSG00000229999	0	0	0	0.101052	0	0	0	0.0871341	0	AL022238.2	22	40372664	40388290	-	893	antisense	novel transcript, antisense to SGSM3 and ADSL	-
ENSG00000226854	0	0	0	0	0	0	0	0	0	AL451105.2	X	75903105	75904858	+	1234	lincRNA	novel transcript	-
ENSG00000214050	0.0566994	0.109749	0.228599	0.188937	0	0.0511194	0.414586	0.21722	0.423722	FBXO16	8	28348287	28490318	-	3972	protein_coding	F-box protein 16 [Source:HGNC Symbol;Acc:HGNC:13618]	-
ENSG00000231706	0	0	0	0	0	0	0	0	0	CYCSP43	X	69485343	69485652	-	310	processed_pseudogene	cytochrome c, somatic pseudogene 43 [Source:HGNC Symbol;Acc:HGNC:24417]	-
ENSG00000224812	0	0	0.0319	0.0175769	0	0	0	0.0303121	0	TMEM72-AS1	10	44811024	44959689	-	3300	antisense	TMEM72 antisense RNA 1 [Source:HGNC Symbol;Acc:HGNC:27349]	-
ENSG00000196562	11.6347	13.1321	8.89433	4.69938	3.9969	4.60456	14.4458	13.1695	11.9412	SULF2	20	47656348	47786616	-	6657	protein_coding	sulfatase 2 [Source:HGNC Symbol;Acc:HGNC:20392]	-
ENSG00000225843	0	0	0	0	0	0	0.0489028	0	0	NIPA2P1	7	91320128	91321103	-	976	processed_pseudogene	NIPA magnesium transporter 2 pseudogene 1 [Source:HGNC Symbol;Acc:HGNC:42041]	-
ENSG00000235598	0	0	0	0	0	0	0	0	0	RRM2P4	X	144309132	144309693	+	562	processed_pseudogene	ribonucleotide reductase M2 polypeptide pseudogene 4 [Source:HGNC Symbol;Acc:HGNC:10456]	-
ENSG00000206775	0	0	0	0	0	0	0	0	0	SNORD37	19	3982507	3982572	-	66	snoRNA	small nucleolar RNA, C/D box 37 [Source:HGNC Symbol;Acc:HGNC:10166]	-
ENSG00000276234	6.20668	6.91025	6.49117	8.55283	6.6099	7.78371	5.63025	6.03398	6.23385	TADA2A	17	37406874	37479730	+	5654	protein_coding	transcriptional adaptor 2A [Source:HGNC Symbol;Acc:HGNC:11531]	-
ENSG00000263797	0	0	0	0	0	0	0	0	0	AP005210.1	18	6873399	6875024	-	544	antisense	novel transcript, antisense to ARHGAP28	-
ENSG00000275923	0	0	0	0	0	0	0	0	0	AL160413.1	20	55504906	55505215	-	310	lincRNA	novel transcript	-
ENSG00000197038	0	0	0	0	0	0	0	0	0	RBMY1A3P	Y	9311130	9322869	-	1404	unprocessed_pseudogene	RNA binding motif protein, Y-linked, family 1, member A3 pseudogene [Source:HGNC Symbol;Acc:HGNC:18849]	-
ENSG00000213486	0	0	0	0	0	0	0	0	0	AC108039.1	2	61710076	61710978	-	609	processed_pseudogene	ribosomal protein L14 (RPL14) pseudogene	-
ENSG00000207090	0	0	0	0	0	0	0	0	0	RNU6-517P	7	121194948	121195057	-	110	snRNA	RNA, U6 small nuclear 517, pseudogene [Source:HGNC Symbol;Acc:HGNC:47480]	-
ENSG00000232754	0	0	0	0	0	0	0	0	0	AL035658.1	22	41169190	41183144	-	357	antisense	novel transcript, antisense to EP300	-
ENSG00000206961	0	0	0	0	0	0	0	0	0	RF00432	2	169727872	169728003	+	132	snoRNA		-
ENSG00000100427	0.142834	0.165885	0.0287937	0.0317307	0	0.257554	0.365541	0.054721	0.160113	MLC1	22	50059391	50085902	-	4297	protein_coding	megalencephalic leukoencephalopathy with subcortical cysts 1 [Source:HGNC Symbol;Acc:HGNC:17082]	-
ENSG00000251639	0	0	0	0.0481759	0	0	0	0	0	AC092535.2	4	1100016	1101558	-	1204	processed_pseudogene	protein phosphatase 2, regulatory subunit B, delta isoform (PPP2R2D) pseudogene	-
ENSG00000228376	0	0	0	0	0	0	0	0	0	GAS2L1P2	9	97075671	97081945	-	2262	transcribed_processed_pseudogene	growth arrest specific 2 like 1 pseudogene 2 [Source:HGNC Symbol;Acc:HGNC:27986]	-
ENSG00000228997	0.237905	0	0.119897	0.264254	0.557896	0.107246	0	0	0	AL136452.1	10	10776223	10776661	-	439	processed_pseudogene	ORM1-like (S. cerevisiae) pseudogene	-
ENSG00000243944	0	0	0	0	0	0	0	0	0	AC117386.2	3	150039214	150213726	+	1032	antisense	uncharacterized LOC105374313 [Source:NCBI gene;Acc:105374313]	-
ENSG00000124535	21.8371	21.7507	20.3127	20.5592	18.6144	20.2807	20.7665	22.0365	21.7231	WRNIP1	6	2765414	2786952	+	3877	protein_coding	Werner helicase interacting protein 1 [Source:HGNC Symbol;Acc:HGNC:20876]	-
ENSG00000091129	0.0983059	0.304456	0.138722	0.0873551	0.129098	0.124084	0.215644	0.225971	0.165297	NRCAM	7	108147623	108456717	-	8193	protein_coding	neuronal cell adhesion molecule [Source:HGNC Symbol;Acc:HGNC:7994]	-
ENSG00000239438	0	0	0	0	0	0	0	0	0	RPS26P48	14	78231281	78231619	-	339	processed_pseudogene	ribosomal protein S26 pseudogene 48 [Source:HGNC Symbol;Acc:HGNC:35519]	-
ENSG00000225091	0.389702	1.50865	0	0.432864	0.365547	0.35135	0	0.746492	0	SNORA71A	20	38427309	38427442	-	134	snoRNA	small nucleolar RNA, H/ACA box 71A [Source:HGNC Symbol;Acc:HGNC:10232]	-
ENSG00000167117	0	0	0	0	0	0	0	0	0	ANKRD40CL	17	50761029	50767557	-	3663	protein_coding	ANKRD40 C-terminal like [Source:HGNC Symbol;Acc:HGNC:26080]	-
ENSG00000272600	0	0	0	0	0	0	0	0	0	AC007308.1	22	20889206	20891214	-	373	antisense	novel transcript, antisense to SNAP29	-
ENSG00000273336	0.48987	0	0	0.108825	0.0919011	0.176664	0	0.0938368	0	OR7M1P	10	133481238	133481770	+	533	unprocessed_pseudogene	olfactory receptor family 7 subfamily M member 1 pseudogene [Source:HGNC Symbol;Acc:HGNC:15128]	-
ENSG00000236216	0	0	0	0	0	0	0	0	0	PPP1R11P1	1	21397987	21398362	+	376	processed_pseudogene	protein phosphatase 1 regulatory inhibitor subunit 11 pseudogene 1 [Source:HGNC Symbol;Acc:HGNC:16326]	-
ENSG00000204291	0.136651	0.11336	0.216443	0.195153	0.073246	0.0880018	0.142741	0.168275	0.109415	COL15A1	9	98943179	99070792	+	6653	protein_coding	collagen type XV alpha 1 chain [Source:HGNC Symbol;Acc:HGNC:2192]	-
ENSG00000257784	0	0	0	0	0	0	0	0	0	LINC02400	12	41764189	41765581	+	408	lincRNA	long intergenic non-protein coding RNA 2400 [Source:HGNC Symbol;Acc:HGNC:53327]	-
ENSG00000163376	2.41398	2.23323	2.5405	4.81065	5.19469	4.83292	1.58989	2.04004	2.15551	KBTBD8	3	66998307	67011210	+	4736	protein_coding	kelch repeat and BTB domain containing 8 [Source:HGNC Symbol;Acc:HGNC:30691]	-
ENSG00000174483	0.0431215	0.166935	0.173856	0.335282	0.323589	0.311022	0.39413	0.330405	0.0805631	BBS1	11	66510606	66533627	+	6145	protein_coding	Bardet-Biedl syndrome 1 [Source:HGNC Symbol;Acc:HGNC:966]	-
ENSG00000198759	0	0	0	0.0676035	0	0	0	0	0	EGFL6	X	13569605	13633575	+	2607	protein_coding	EGF like domain multiple 6 [Source:HGNC Symbol;Acc:HGNC:3235]	-
ENSG00000211892	0	0	0	0	0	0	0	0	0	IGHG4	14	105620506	105626066	-	2740	IG_C_gene	immunoglobulin heavy constant gamma 4 (G4m marker) [Source:HGNC Symbol;Acc:HGNC:5528]	-
ENSG00000248913	0	0	0	0	0	0	0	0	0	PHBP14	4	167648430	167648796	+	367	processed_pseudogene	prohibitin pseudogene 14 [Source:HGNC Symbol;Acc:HGNC:39293]	-
ENSG00000117298	145.94	143.636	148.056	124.339	122.687	127.38	142.032	134.63	135.389	ECE1	1	21217247	21345572	-	7333	protein_coding	endothelin converting enzyme 1 [Source:HGNC Symbol;Acc:HGNC:3146]	-
ENSG00000236209	0.547524	0.662381	0.689842	0.228062	0.38519	0.37023	0.625546	0.852156	0.958996	AC104135.1	2	74919555	74924846	-	763	lincRNA	novel transcript	-
ENSG00000271034	0	0	0	0	0	0	0	0	0	AC139700.1	3	70125070	70126609	-	1540	processed_pseudogene	RNA-binding region (RNP1, RRM) containing 3, pseudogene	-
ENSG00000230425	0	0	0	0	0	0	0	0	0	RSU1P1	10	42725857	42737159	+	441	unprocessed_pseudogene	Ras suppressor protein 1 pseudogene 1 [Source:HGNC Symbol;Acc:HGNC:31114]	-
ENSG00000257803	0	0	0	0	0	0.0323803	0	0	0	AC010200.1	12	100578744	100580197	+	1454	processed_pseudogene	phosphatidylinositol glycan anchor biosynthesis, class A (PIGA) pseudogene	-
ENSG00000170011	0.0322645	0	0	0	0	0.0436339	0	0	0.0150698	MYRIP	3	39808914	40260321	+	5872	protein_coding	myosin VIIA and Rab interacting protein [Source:HGNC Symbol;Acc:HGNC:19156]	-
ENSG00000283365	0	0	0	0	0	0	0	0	0	AC007603.3	16	49954985	49968730	-	979	unitary_pseudogene	nuclear receptor coactivator 5-like pseudogene	-
ENSG00000219088	0	0	0	0	0	0	0	0	0	Z97206.1	6	105666326	105667998	+	1673	processed_pseudogene	chromatin assembly factor 1, p60 subunit B (CHAF1B) pseudogene	-
ENSG00000248295	0	0	0	0	0	0	0	0	0	DDX43P1	5	115974513	115976275	-	1763	processed_pseudogene	DEAD-box helicase 43 pseudogene 1 [Source:HGNC Symbol;Acc:HGNC:50780]	-
ENSG00000189343	74.8114	84.4235	100.68	102.213	93.5842	89.9497	80.7018	89.6078	94.3577	RPS2P46	17	19445970	19446852	-	883	processed_pseudogene	ribosomal protein S2 pseudogene 46 [Source:HGNC Symbol;Acc:HGNC:35839]	-
ENSG00000223126	0	0	0	0	0	0	0	0	0	RN7SKP263	12	94008739	94009047	-	309	misc_RNA	RNA, 7SK small nuclear pseudogene 263 [Source:HGNC Symbol;Acc:HGNC:45987]	-
ENSG00000265986	0	0	0	0	0	0	0	0	0	MIR4735	1	196582413	196582481	-	69	miRNA	microRNA 4735 [Source:HGNC Symbol;Acc:HGNC:41888]	-
ENSG00000250913	0	0	0	0	0	0	0	0	0	USP17L23	4	9272364	9272914	+	551	protein_coding	ubiquitin specific peptidase 17-like family member 23 [Source:HGNC Symbol;Acc:HGNC:44451]	-
ENSG00000231864	0	0	0	0	0	0	0	0	0	AL807752.3	9	137063535	137064581	+	748	antisense	novel transcript	-
ENSG00000233851	0.0826268	0	0	0	0	0	0.226563	0	0	LATS2-AS1	13	21005157	21018122	+	632	antisense	LATS2 antisense RNA 1 [Source:HGNC Symbol;Acc:HGNC:39912]	-
ENSG00000164615	26.9145	27.4432	25.8783	26.5075	25.7492	27.0761	27.4489	29.3734	29.5879	CAMLG	5	134738501	134752160	+	2221	protein_coding	calcium modulating ligand [Source:HGNC Symbol;Acc:HGNC:1471]	-
ENSG00000224373	0	0	0	0	0	0	0	0	0	IGHV4-59	14	106627249	106627825	-	495	IG_V_gene	immunoglobulin heavy variable 4-59 [Source:HGNC Symbol;Acc:HGNC:5654]	-
ENSG00000146192	0	0	0	0	0	0	0	0	0	FGD2	6	37005646	37029070	+	10167	protein_coding	FYVE, RhoGEF and PH domain containing 2 [Source:HGNC Symbol;Acc:HGNC:3664]	-
ENSG00000276623	0	0	0	0	0	0	0	0	0	AC106872.12	4	165016887	165017433	+	547	processed_pseudogene	tripartite motif containing 60 (TRIM60) pseudogene	-
ENSG00000253427	0	0	0	0	0	0	0	0	0	AC084116.2	8	126474189	126492596	+	415	lincRNA	novel transcript	-
ENSG00000080644	0	0	0	0	0	0	0	0.0414374	0	CHRNA3	15	78593052	78621295	-	4765	protein_coding	cholinergic receptor nicotinic alpha 3 subunit [Source:HGNC Symbol;Acc:HGNC:1957]	-
ENSG00000166532	8.36316	7.57272	6.45792	8.50218	8.74892	7.36119	7.43663	7.73848	6.35582	RIMKLB	12	8681600	8783095	+	8619	protein_coding	ribosomal modification protein rimK like family member B [Source:HGNC Symbol;Acc:HGNC:29228]	-
ENSG00000259870	0	0	0	0	0	0	0	0	0	AC024651.2	15	97876289	97878386	+	2098	lincRNA	novel transcript	-
ENSG00000131873	58.8456	53.9871	57.9128	63.543	63.1838	63.7809	54.9895	54.6207	54.6373	CHSY1	15	101175723	101251932	-	5555	protein_coding	chondroitin sulfate synthase 1 [Source:HGNC Symbol;Acc:HGNC:17198]	-
ENSG00000261325	0	0	0	0	0	0	0	0	0	LINC02192	16	47849314	47887130	-	1325	lincRNA	long intergenic non-protein coding RNA 2192 [Source:HGNC Symbol;Acc:HGNC:53054]	-
ENSG00000237515	0	0	0	0	0	0.0180872	0	0	0	SHISA9	16	12901620	13240413	+	10155	protein_coding	shisa family member 9 [Source:HGNC Symbol;Acc:HGNC:37231]	-
ENSG00000229325	0.378407	0.366229	0.228847	0.336254	0.283961	0.750566	0.0691727	0.144971	0.424182	ACAP2-IT1	3	195280723	195282741	-	690	sense_intronic	ACAP2 intronic transcript 1 [Source:HGNC Symbol;Acc:HGNC:41426]	-
ENSG00000262408	0	0	0	0	0	0	0	0	0	AC015912.2	17	56884639	56884819	-	181	processed_pseudogene	family with sequence similarity 89, member B (FAM89B) pseudogene	-
ENSG00000078295	0	0	0	0	0	0	0	0	0	ADCY2	5	7396208	7830081	+	17538	protein_coding	adenylate cyclase 2 [Source:HGNC Symbol;Acc:HGNC:233]	-
ENSG00000226504	0	0	0	0	0	0	0	0	0	TMEM167AP1	Y	20907344	20907562	-	219	processed_pseudogene	transmembrane protein 167A pseudogene 1 [Source:HGNC Symbol;Acc:HGNC:23956]	-
ENSG00000163781	10.0862	9.40342	9.79327	12.3682	13.8299	14.0714	8.9087	8.27182	8.24061	TOPBP1	3	133598175	133662380	-	7304	protein_coding	DNA topoisomerase II binding protein 1 [Source:HGNC Symbol;Acc:HGNC:17008]	-
ENSG00000213578	0	0	0	0	0	0	0	0	0	CPLX3	15	74826547	74831802	+	2082	protein_coding	complexin 3 [Source:HGNC Symbol;Acc:HGNC:27652]	-
ENSG00000135241	14.3553	14.5226	13.9713	15.7719	18.5151	16.483	13.7625	15.1938	14.1387	PNPLA8	7	108470422	108569666	-	5668	protein_coding	patatin like phospholipase domain containing 8 [Source:HGNC Symbol;Acc:HGNC:28900]	-
ENSG00000252012	0	0	0	0	0	0	0	0	0	RNA5SP521	Y	17559774	17559889	+	116	rRNA_pseudogene	RNA, 5S ribosomal pseudogene 521 [Source:HGNC Symbol;Acc:HGNC:43421]	-
ENSG00000164299	0	0	0	0	0	0	0	0	0	SPZ1	5	80319625	80321842	+	1945	protein_coding	spermatogenic leucine zipper 1 [Source:HGNC Symbol;Acc:HGNC:30721]	Others
ENSG00000224394	0	0	0	0	0	0	0	0	0	GPC6-AS2	13	93818424	93836144	-	587	antisense	GPC6 antisense RNA 2 [Source:HGNC Symbol;Acc:HGNC:39910]	-
ENSG00000252143	0	0	0	0	0	0	0	0	0	RF00492	22	21544897	21545039	+	143	scaRNA		-
ENSG00000234986	0	0	0	0	0	0	0	0	0	AL731661.2	6	170695313	170696950	+	806	lincRNA	novel transcript	-
ENSG00000202056	0	0	0	0	0	0	0	0	0	RNA5SP19	1	228555793	228555901	+	109	rRNA_pseudogene	RNA, 5S ribosomal pseudogene 19 [Source:HGNC Symbol;Acc:HGNC:42587]	-
ENSG00000198832	177.47	216.383	216.701	197.487	187.515	194.304	199.298	234.877	213.105	SELENOM	22	31104772	31120069	-	3187	protein_coding	selenoprotein M [Source:HGNC Symbol;Acc:HGNC:30397]	-
ENSG00000201331	0	0	0	0	0	0	0	0	0	SNORD115-23	15	25211796	25211877	+	82	snoRNA	small nucleolar RNA, C/D box 115-23 [Source:HGNC Symbol;Acc:HGNC:33042]	-
ENSG00000276855	2.4218	4.10177	3.28015	3.78285	1.98773	2.2517	2.2827	2.60948	3.39346	AC015922.3	17	15789016	15789705	+	690	lincRNA	novel transcript	-
ENSG00000259659	0.239909	0.232188	0.322419	0	0.150025	0.432597	0.146184	0.229778	0.149406	AC009996.1	15	44557829	44559188	+	653	sense_intronic	novel transcript	-
ENSG00000165934	18.3616	16.5223	18.6595	22.9819	22.4094	22.9589	16.3538	16.4631	17.6688	CPSF2	14	92121937	92172145	+	13595	protein_coding	cleavage and polyadenylation specific factor 2 [Source:HGNC Symbol;Acc:HGNC:2325]	-
ENSG00000205318	0	0	0	0	0	0	0	0	0	GCNT2P	6	10633762	10634695	+	934	processed_pseudogene	GCNT2 pseudogene [Source:HGNC Symbol;Acc:HGNC:21623]	-
ENSG00000278294	0	0	0	0	0	0	0	0	0	RF00002	KI270442.1	217250	217401	-	152	rRNA		-
ENSG00000280607	0	0	0	0	0	0	0	0	0	AC009133.5	16	29808679	29812227	+	473	processed_transcript	novel transcript	-
ENSG00000267760	0	0	0	0	0	0	0	0	0	AC011478.1	19	30665274	30668647	-	554	lincRNA	novel transcript	-
ENSG00000267740	0	0	0	0	0	0	0	0	0	AC024592.3	19	5866171	5903787	-	2193	protein_coding	novel protein	-
ENSG00000240808	0	0	0.1815	0	0	0	0	0	0	AC126389.1	11	17137976	17138265	-	290	processed_pseudogene	ribosomal protein L34 (RPL34) pseudogene	-
ENSG00000273464	0	0.355913	0	0	0	0	0.11204	0	0	AP000238.1	21	29657406	29657831	+	426	antisense	novel transcript, antisense to GRIK1	-
ENSG00000267661	0	0	0	0	0	0	0	0	0	AP001269.3	18	11928838	11929476	+	329	processed_pseudogene	ribosomal protein S20 (RPS20) pseudogene	-
ENSG00000212387	0	0	0	0	0	0	0	0	0	RNU6-1055P	4	186501109	186501215	+	107	snRNA	RNA, U6 small nuclear 1055, pseudogene [Source:HGNC Symbol;Acc:HGNC:48018]	-
ENSG00000231643	0	0	0	0	0	0	0	0	0	Z70280.1	X	101191115	101191409	-	295	processed_pseudogene	tyrosine 3-monooxygenase/tryptophan 5-monooxygenase activation protein, theta polypeptide (YWHAQ) pseudogene	-
ENSG00000230896	2.88171	2.70446	3.16866	2.81289	2.62118	4.40892	3.8311	4.26549	2.4472	AL604028.1	1	45694684	45697075	-	598	sense_intronic	novel transcript	-
ENSG00000215045	0.0152423	0	0.0307268	0	0	0	0.0278629	0	0	GRID2IP	7	6497462	6551436	-	4134	protein_coding	Grid2 interacting protein [Source:HGNC Symbol;Acc:HGNC:18464]	-
ENSG00000213071	0.549324	0.764242	0.622898	0.343218	0.096614	0.680987	0.815883	0.460362	0.416931	LPAL2	6	160453428	160520269	-	4749	transcribed_unprocessed_pseudogene	lipoprotein(a) like 2, pseudogene [Source:HGNC Symbol;Acc:HGNC:21210]	-
ENSG00000114670	3.33738	3.29331	3.33091	3.01649	3.8671	3.68742	3.52885	3.69785	4.00395	NEK11	3	131026850	131350465	+	5355	protein_coding	NIMA related kinase 11 [Source:HGNC Symbol;Acc:HGNC:18593]	-
ENSG00000206846	0	0	0	0	0	0	0	0	0	RF00019	15	30673750	30673843	+	94	misc_RNA		-
ENSG00000263643	0	0	1.29963	0.716096	0	0	0	0	0	MIR4515	15	83067335	83067415	+	81	miRNA	microRNA 4515 [Source:HGNC Symbol;Acc:HGNC:41800]	-
ENSG00000259561	0	0	0	0	0	0	0	0	0	AC079075.1	15	89704665	89705415	+	449	sense_intronic	novel transcript	-
ENSG00000201892	0	0	0	0	0	0	0	0	0	RF00019	2	140992543	140992659	+	117	misc_RNA		-
ENSG00000211968	0	0	0	0	0	0	0	0	0	IGHV1-58	14	106622357	106622855	-	414	IG_V_gene	immunoglobulin heavy variable 1-58 [Source:HGNC Symbol;Acc:HGNC:5555]	-
ENSG00000266808	0	0	0	0	0	0	0	0	0	MIR548AE1	2	184378975	184379044	+	70	miRNA	microRNA 548ae-1 [Source:HGNC Symbol;Acc:HGNC:41742]	-
ENSG00000138685	139.215	127.228	144.92	147.767	132.376	140.466	124.05	134.338	117.669	FGF2	4	122826708	122898236	+	6775	protein_coding	fibroblast growth factor 2 [Source:HGNC Symbol;Acc:HGNC:3676]	-
ENSG00000243338	0	0	0	0	0	0	0	0	0	RN7SL307P	15	49198900	49199194	-	295	misc_RNA	RNA, 7SL, cytoplasmic 307, pseudogene [Source:HGNC Symbol;Acc:HGNC:46323]	-
ENSG00000225102	0	0	0	0	0	0	0	0	0	AL157373.1	6	11990343	11992012	-	276	antisense	novel transcript	-
ENSG00000240990	4.13673	5.84056	5.59215	5.13547	4.38248	3.7735	5.4268	4.80107	5.72824	HOXA11-AS	7	27184507	27189298	+	3128	antisense	HOXA11 antisense RNA [Source:HGNC Symbol;Acc:HGNC:24957]	-
ENSG00000142765	0.159208	0.215718	0.128378	0.106104	0	0.0287079	0.0582063	0.0304969	0.118978	SYTL1	1	27342020	27353937	+	5584	protein_coding	synaptotagmin like 1 [Source:HGNC Symbol;Acc:HGNC:15584]	-
ENSG00000229351	0	0	0	0	0	0	0	0	0	KRTAP9-11P	17	41271311	41271835	+	525	unprocessed_pseudogene	keratin associated protein 9-11, pseudogene [Source:HGNC Symbol;Acc:HGNC:18918]	-
ENSG00000229924	0	0	0	0	0	0	0	0	0	FAM90A26	4	9170409	9176730	+	2492	protein_coding	family with sequence similarity 90 member A26 [Source:HGNC Symbol;Acc:HGNC:43746]	-
ENSG00000130700	0	0	0	0	0	0	0	0	0	GATA5	20	62463497	62475970	-	2595	protein_coding	GATA binding protein 5 [Source:HGNC Symbol;Acc:HGNC:15802]	zf-GATA
ENSG00000277386	0	0	0.10506	0.115776	0	0	0	0.0998303	0	AL138999.1	13	33336216	33336716	-	501	sense_intronic	novel transcript, sense intronic to STARD13	-
ENSG00000258615	0	0	0	0	0	0	0	0	0	AL117187.1	14	95199039	95199345	+	181	unprocessed_pseudogene	mitochondrially encoded ATP synthase 6 (MT-ATP6) pseudogene	-
ENSG00000211769	0	0	0	0	0	0	1.98872	0	0	TRBJ2-5	7	142797119	142797166	+	48	TR_J_gene	T cell receptor beta joining 2-5 [Source:HGNC Symbol;Acc:HGNC:12173]	-
ENSG00000225466	0	0	0	0	0	0	0	0	0	OFD1P10Y	Y	23581595	23614640	+	1433	unprocessed_pseudogene	OFD1 pseudogene 10 Y-linked [Source:HGNC Symbol;Acc:HGNC:23882]	-
ENSG00000269237	0	0	0	0	0	0	0	0	0	AC010615.4	19	21405159	21491266	+	472	protein_coding	novel transcript	-
ENSG00000149243	1.20462	0.582926	0.637447	0.936624	0.706218	0.733094	1.10102	1.1249	1.09715	KLHL35	11	75422394	75430629	-	5041	protein_coding	kelch like family member 35 [Source:HGNC Symbol;Acc:HGNC:26597]	-
ENSG00000185414	13.7559	12.8791	15.1462	16.442	15.8486	16.817	11.8213	14.4639	12.9547	MRPL30	2	99181079	99197626	+	2898	protein_coding	mitochondrial ribosomal protein L30 [Source:HGNC Symbol;Acc:HGNC:14036]	-
ENSG00000283399	0	0	0.0396049	0	0	0	0	0.0376336	0	AC004381.2	16	20711473	20732990	+	1329	unprocessed_pseudogene	novel acyl-CoA synthetase medium-chain family member pseudogene	-
ENSG00000227517	0.10444	0	0.10527	0.348023	0.2939	0.188324	0	0.050015	0.0975619	LINC01483	17	69577251	69903000	+	4173	lincRNA	long intergenic non-protein coding RNA 1483 [Source:HGNC Symbol;Acc:HGNC:51130]	-
ENSG00000253346	0	0	0	0	0	0	0	0	0	AC109329.1	8	30331961	30332277	-	317	processed_pseudogene	general transcription factor IIA, 2, 12kDa (GTF2A2) pseudogene	-
ENSG00000250467	0	0	0	0	0	0	0	0	0	AC105389.3	4	41748293	41824119	+	907	antisense	novel transcript, antisense to PHOX2B	-
ENSG00000239393	0	0	0	0	0	0	0	0	0	AC146507.1	5	177346073	177346426	+	354	processed_pseudogene	ribosomal protein S20 (RPS20) pseudogene	-
ENSG00000261123	0.0876176	0.169596	0	0	0.164373	0.15799	0	0.0839178	0.163694	AC009065.5	16	2094830	2097026	-	596	sense_intronic	novel transcript, intronic to PKD1	-
ENSG00000270431	0	0	0	0	0	0.303748	0	0	0	AC005000.2	X	115659713	115660022	+	310	processed_pseudogene	PHD finger protein 5A (PHF5A) pseudogene	-
ENSG00000241397	0	0	0	0	0	0	0	0	0	LINC00903	3	116552473	116568264	+	223	antisense	long intergenic non-protein coding RNA 903 [Source:HGNC Symbol;Acc:HGNC:40351]	-
ENSG00000127528	17.2719	18.0079	21.4454	31.4955	29.1016	29.3937	13.901	15.4578	15.9077	KLF2	19	16324817	16327874	+	2018	protein_coding	Kruppel like factor 2 [Source:HGNC Symbol;Acc:HGNC:6347]	zf-C2H2
ENSG00000256484	0	0	0	0	0	0	0	0	0	AC140118.1	12	131366660	131371059	+	532	lincRNA	novel transcript	-
ENSG00000225727	0.112301	0	0	0	0	0.101249	0.102643	0.215118	0	AL139184.1	13	44437057	44464921	+	850	transcribed_processed_pseudogene	filamin A interacting protein 1-like (FILIP1L) pseudogene	-
ENSG00000241464	0	0.330324	0.688038	0	0	0	0	0	0	RPL39P38	19	18285343	18285495	-	153	processed_pseudogene	ribosomal protein L39 pseudogene 38 [Source:HGNC Symbol;Acc:HGNC:36935]	-
ENSG00000242256	0	0	0	0	0	0	0	0	0	RN7SL57P	9	112242550	112242839	-	290	misc_RNA	RNA, 7SL, cytoplasmic 57, pseudogene [Source:HGNC Symbol;Acc:HGNC:46073]	-
ENSG00000235190	0	0	0	0	0	0	0	0	0	AL008629.1	X	131937670	131937853	+	184	processed_pseudogene	pseudogene similar to part of SMT3 suppressor of mif two 3 (yeast)	-
ENSG00000169248	0	0.0851553	0.443428	0	0	0	0.0402099	0	0	CXCL11	4	76033682	76041415	-	1908	protein_coding	C-X-C motif chemokine ligand 11 [Source:HGNC Symbol;Acc:HGNC:10638]	-
ENSG00000125971	90.436	96.975	94.4844	139.614	135.664	107.01	91.4922	108.012	105.761	DYNLRB1	20	34516409	34540958	+	2460	protein_coding	dynein light chain roadblock-type 1 [Source:HGNC Symbol;Acc:HGNC:15468]	-
ENSG00000128342	103.021	96.1383	116.969	134.088	118.861	126.567	98.4506	117.747	90.3763	LIF	22	30240447	30246851	-	3969	protein_coding	LIF, interleukin 6 family cytokine [Source:HGNC Symbol;Acc:HGNC:6596]	-
ENSG00000236266	0	0	0	0	0.29508	0	0	0	0	Z98884.1	1	7810242	7827342	-	830	antisense	novel transcript	-
ENSG00000130714	19.2454	21.002	20.2231	25.7533	25.6146	25.7128	22.7427	23.919	21.7716	POMT1	9	131502902	131523806	+	6067	protein_coding	protein O-mannosyltransferase 1 [Source:HGNC Symbol;Acc:HGNC:9202]	-
ENSG00000232658	0	0	0	0	0	0	0	0	0	AC092638.1	2	193256483	193257757	+	1275	processed_pseudogene	solute carrier family 44, member 3 (SLC44A3) pseudogene	-
ENSG00000263885	0	0	0	0	0	0	0	0	0	MIR3920	11	101519820	101519905	-	86	miRNA	microRNA 3920 [Source:HGNC Symbol;Acc:HGNC:38974]	-
ENSG00000199308	0	0	0	0	0	0	0	0	0	RNU6-222P	19	54868939	54869045	-	107	snRNA	RNA, U6 small nuclear 222, pseudogene [Source:HGNC Symbol;Acc:HGNC:47185]	-
ENSG00000247596	38.1077	45.5951	41.4917	41.212	42.7376	42.3615	42.9448	43.9988	39.4707	TWF2	3	52228610	52239260	-	1824	protein_coding	twinfilin actin binding protein 2 [Source:HGNC Symbol;Acc:HGNC:9621]	-
ENSG00000228797	0.930655	1.00079	1.04228	1.26345	0.484983	1.30521	1.03965	0.594238	1.44894	FAM207BP	13	18697003	18697507	+	505	processed_pseudogene	family with sequence similarity 207 member B, pseudogene [Source:HGNC Symbol;Acc:HGNC:39715]	-
ENSG00000149575	0	0	0	0	0	0	0	0	0	SCN2B	11	118161951	118176673	-	5826	protein_coding	sodium voltage-gated channel beta subunit 2 [Source:HGNC Symbol;Acc:HGNC:10589]	-
ENSG00000198142	3.03879	2.70225	3.17595	2.95188	3.12391	3.1239	2.50073	2.85677	2.60821	SOWAHC	2	109614334	109618990	+	4657	protein_coding	sosondowah ankyrin repeat domain family member C [Source:HGNC Symbol;Acc:HGNC:26149]	-
ENSG00000253207	0	0	0	0	0	0	0	0	0	AC103993.1	8	113600310	113616958	+	1584	lincRNA	novel transcript	-
ENSG00000223162	0	0	0	0	0	0	0	0	0	RNA5SP280	9	27198287	27198401	+	115	rRNA_pseudogene	RNA, 5S ribosomal pseudogene 280 [Source:HGNC Symbol;Acc:HGNC:43180]	-
ENSG00000107331	29.1287	29.2311	27.8473	18.7347	19.7725	20.2962	28.5409	25.9712	27.7041	ABCA2	9	137007227	137028922	-	11514	protein_coding	ATP binding cassette subfamily A member 2 [Source:HGNC Symbol;Acc:HGNC:32]	-
ENSG00000266240	0.561507	0	0	1.24739	0	0	0	0	0	MIR5091	4	13627865	13627957	+	93	miRNA	microRNA 5091 [Source:HGNC Symbol;Acc:HGNC:43478]	-
ENSG00000252468	0	0	0	0	0	0	0	0	0	RNU2-57P	Y	5019076	5019266	+	191	snRNA	RNA, U2 small nuclear 57, pseudogene [Source:HGNC Symbol;Acc:HGNC:48550]	-
ENSG00000204310	23.0345	23.7628	21.8945	21.4405	23.7312	20.8836	23.4294	22.6288	22.5032	AGPAT1	6	32168212	32178096	-	3631	protein_coding	1-acylglycerol-3-phosphate O-acyltransferase 1 [Source:HGNC Symbol;Acc:HGNC:324]	-
ENSG00000150275	0	0	0	0	0	0	0.00893136	0	0	PCDH15	10	53802771	55627942	-	15423	protein_coding	protocadherin related 15 [Source:HGNC Symbol;Acc:HGNC:14674]	-
ENSG00000221046	0	0	0	0	0	0	0	0	0	RNU6ATAC38P	20	45778698	45778823	+	126	snRNA	RNA, U6atac small nuclear 38, pseudogene [Source:HGNC Symbol;Acc:HGNC:46937]	-
ENSG00000121577	1.81635	1.40632	2.15117	0.857447	0.937072	0.777859	2.07518	2.0006	2.50267	POPDC2	3	119636457	119665324	-	2445	protein_coding	popeye domain containing 2 [Source:HGNC Symbol;Acc:HGNC:17648]	-
ENSG00000229060	0	0	0	0	0	0	0	0	0	AL451124.1	9	28148211	28149236	+	1026	processed_pseudogene	novel pseudogene	-
ENSG00000255786	0	0	0	0	0	0	0	0	0	AP000763.1	11	73452020	73452344	+	325	processed_pseudogene	nucleophosmin/nucleoplasmin 3 (NPM3) pseudogene	-
ENSG00000279119	0	0	0	0	0	0	0	0	0	AC006449.7	17	38727833	38728198	-	366	TEC	TEC	-
ENSG00000197121	6.35914	5.53298	6.36229	4.12324	4.68676	4.4059	5.38278	4.80048	4.56498	PGAP1	2	196833004	196927796	-	12761	protein_coding	post-GPI attachment to proteins 1 [Source:HGNC Symbol;Acc:HGNC:25712]	-
ENSG00000083635	2.25809	2.19989	2.39661	3.27226	2.86157	3.66724	1.85887	2.73564	2.277	NUFIP1	13	44939249	44989483	-	3492	protein_coding	NUFIP1, FMR1 interacting protein 1 [Source:HGNC Symbol;Acc:HGNC:8057]	-
ENSG00000276517	0.0869176	0.0672965	0.245303	0.0579265	0.114142	0.0783638	0.0794427	0.0665979	0.211103	AL133243.3	2	32526504	32529507	+	3004	sense_intronic	novel transcript, sense intronic to BIRC6	-
ENSG00000254092	0	0	0	0	0	0	0	0	0	AC015468.3	8	20952645	20973877	-	417	lincRNA	novel transcript	-
ENSG00000275763	0.352159	0.170413	0.354956	0.307342	0.401116	0.362859	0.459819	0.289104	0.422956	C18orf65	18	76495521	76498088	+	2076	lincRNA	chromosome 18 open reading frame 65 [Source:HGNC Symbol;Acc:HGNC:51248]	-
ENSG00000212576	0	0	0	0	0	0	0	0	0.413398	RNA5SP467	19	12106497	12106614	+	118	rRNA_pseudogene	RNA, 5S ribosomal pseudogene 467 [Source:HGNC Symbol;Acc:HGNC:43367]	-
ENSG00000267497	0.053313	0.103195	0.0537365	0	0	0	0.0487281	0.0510618	0.0249009	NFE2L3P1	18	59969438	59971396	+	1959	processed_pseudogene	nuclear factor, erythroid 2 like 3 pseudogene 1 [Source:HGNC Symbol;Acc:HGNC:22278]	-
ENSG00000164197	1.35492	0.730901	0.671649	0.641471	0.791733	0.801037	0.629351	0.808409	1.43168	RNF180	5	64165844	64372869	+	5434	protein_coding	ring finger protein 180 [Source:HGNC Symbol;Acc:HGNC:27752]	-
ENSG00000260310	0	0	0	0	0.112605	0	0	0	0	AC027277.2	16	10576499	10578183	-	435	sense_intronic	novel transcript, sense intronic to EMP2	-
ENSG00000235227	0	0	0	0	0	0	0	0	0	VN1R38P	7	64180006	64180892	-	887	unitary_pseudogene	vomeronasal 1 receptor 38 pseudogene [Source:HGNC Symbol;Acc:HGNC:37358]	-
ENSG00000236241	0	0	0	0	0	0	0	0	0	AC119744.1	3	175675087	175676801	-	1715	processed_pseudogene	DEAD (Asp-Glu-Ala-Asp) box polypeptide 5 (DDX5) pseudogene	-
ENSG00000261206	0	0	0	0	0	0	0	0	0	LINC00561	13	75932395	75935132	-	2738	lincRNA	long intergenic non-protein coding RNA 561 [Source:HGNC Symbol;Acc:HGNC:43705]	-
ENSG00000277704	0	0	0	0	0	0	0	0	0	AL445675.2	1	242890247	242890803	+	557	processed_pseudogene	chromosome 2 open reading frame 27B (C2orf27B) pseudogene	-
ENSG00000176125	1.67775	1.87748	1.74393	2.8536	4.4262	2.41077	1.86891	2.8623	2.20396	UFSP1	7	100888723	100889718	-	996	protein_coding	UFM1 specific peptidase 1 (inactive) [Source:HGNC Symbol;Acc:HGNC:33821]	-
ENSG00000275833	1.09706	0.424703	0.44231	0.487427	0.823249	0.395638	0	1.05074	0.614886	AC073107.2	7	65764535	65768306	+	238	unprocessed_pseudogene	sulfatase modifying factor 2 (SUMF2) pseudogene	-
ENSG00000252689	0	0	0	0	0	0	0	0	0	RF00401	Y	16138248	16138379	-	132	snoRNA		-
ENSG00000223622	0	0	0	0	0	0	0	0	0	GSTA6P	6	52805613	52813460	-	582	unprocessed_pseudogene	glutathione S-transferase alpha 6, pseudogene [Source:HGNC Symbol;Acc:HGNC:4630]	-
ENSG00000239886	0	0	0	0	0	0	0	0	0	KRTAP9-2	17	41226648	41227652	+	1005	protein_coding	keratin associated protein 9-2 [Source:HGNC Symbol;Acc:HGNC:16926]	-
ENSG00000207960	0	0	0	0	0	0	0	0	0	MIR153-2	7	157574336	157574422	-	87	miRNA	microRNA 153-2 [Source:HGNC Symbol;Acc:HGNC:31540]	-
ENSG00000226631	0	0	0	0	0	0	0	0	0	SLC9A3P3	10	50025135	50027363	-	2229	processed_pseudogene	solute carrier family 9 member 3 pseudogene 3 [Source:HGNC Symbol;Acc:HGNC:33492]	-
ENSG00000180974	0	0	0	0	0	0	0	0	0	OR52E4	11	5880629	5887079	+	2947	protein_coding	olfactory receptor family 52 subfamily E member 4 [Source:HGNC Symbol;Acc:HGNC:15213]	-
ENSG00000264490	0	0	0	0	0	0	0	0	0	BX640514.1	20	62575590	62577507	+	1918	lincRNA	novel transcript	-
ENSG00000255272	0	0	0	0	0	0	0	0	0	AC113192.5	11	33776188	33779495	+	486	antisense	novel transcript	-
ENSG00000166451	5.79712	5.6551	7.14165	15.7913	16.3565	15.1406	5.50883	8.24036	5.11448	CENPN	16	81006498	81033114	+	3568	protein_coding	centromere protein N [Source:HGNC Symbol;Acc:HGNC:30873]	-
ENSG00000226207	0	0	0	0	0	0	0	0	0	AL080316.1	6	97710953	97717197	-	499	lincRNA	novel transcript	-
ENSG00000225246	0	0	0	0	0	0	0	0	0	RPS2P1	20	34122470	34123290	+	821	processed_pseudogene	ribosomal protein S2 pseudogene 1 [Source:HGNC Symbol;Acc:HGNC:16580]	-
ENSG00000242326	0	0	0	0	0	0	0	0	0	MCUR1P2	3	166181313	166181820	-	508	processed_pseudogene	MCUR1 pseudogene 2 [Source:HGNC Symbol;Acc:HGNC:53756]	-
ENSG00000224169	0	0	0	0	0	0	0	0	0	HSFY6P	Y	23657839	23659058	-	403	unprocessed_pseudogene	heat shock transcription factor Y-linked 6, pseudogene [Source:HGNC Symbol;Acc:HGNC:38790]	-
ENSG00000196993	0	0	0.0759158	0.0557729	0.0941986	0.113175	0.0688402	0.0480913	0.0234524	NPIPB9	16	28751787	28772807	+	2123	protein_coding	nuclear pore complex interacting protein family member B9 [Source:HGNC Symbol;Acc:HGNC:41987]	-
ENSG00000090924	20.5962	19.4737	19.084	21.8221	22.5024	22.4545	17.2433	17.1266	18.067	PLEKHG2	19	39412585	39428415	+	9200	protein_coding	pleckstrin homology and RhoGEF domain containing G2 [Source:HGNC Symbol;Acc:HGNC:29515]	-
ENSG00000249518	0	0	0.051806	0	0	0	0	0	0	AC011352.2	5	147851644	147852659	-	1016	processed_pseudogene	formyl peptide receptor 3 pseudogene	-
ENSG00000198431	610.049	616.166	734.032	683.566	681.204	674.983	595.664	661.428	646.785	TXNRD1	12	104215779	104350305	+	6708	protein_coding	thioredoxin reductase 1 [Source:HGNC Symbol;Acc:HGNC:12437]	-
ENSG00000213950	0	0	0	0	0	0	0	0	0	RPS10P2	20	14757563	14758056	+	494	processed_pseudogene	ribosomal protein S10 pseudogene 2 [Source:HGNC Symbol;Acc:HGNC:16594]	-
ENSG00000256128	0	0	0	0	0	0	0	0	0	LINC00944	12	126729787	126772411	-	1853	lincRNA	long intergenic non-protein coding RNA 944 [Source:HGNC Symbol;Acc:HGNC:48640]	-
ENSG00000264150	0	0	0	0	0	0	0	0	0	AP005136.1	18	2568392	2569122	+	429	processed_pseudogene	ubiquitin-conjugating enzyme E2 variant 1 (UBE2V1) pseudogene	-
ENSG00000276368	0	0	0.408023	0	0.126572	0	0	0.129238	0	HIST1H2AJ	6	27814354	27814740	-	387	protein_coding	histone cluster 1 H2A family member j [Source:HGNC Symbol;Acc:HGNC:4727]	-
ENSG00000252922	0	0	0	0	0	0	0	0	0	RNU6-365P	11	41122907	41123012	-	106	snRNA	RNA, U6 small nuclear 365, pseudogene [Source:HGNC Symbol;Acc:HGNC:47328]	-
ENSG00000116288	171.212	179.662	177.7	216.137	223.596	221.588	178.911	208.632	189.771	PARK7	1	7954291	7985505	+	2397	protein_coding	Parkinsonism associated deglycase [Source:HGNC Symbol;Acc:HGNC:16369]	-
ENSG00000089820	0.564362	0.385554	0.401538	0.147498	0.21798	0.239445	0.515827	0.69951	0.372137	ARHGAP4	X	153907367	153934999	-	5580	protein_coding	Rho GTPase activating protein 4 [Source:HGNC Symbol;Acc:HGNC:674]	-
ENSG00000182873	2.05986	1.67029	1.57119	1.60778	1.46219	1.05405	1.73006	1.49298	2.08021	PRKCZ-AS1	1	2181794	2184389	-	1734	antisense	PRKCZ antisense RNA 1 [Source:HGNC Symbol;Acc:HGNC:40477]	-
ENSG00000204427	0.850644	0.731796	0.571601	0.524921	0.930904	1.32082	1.07985	0.588412	0.750476	ABHD16A	6	31686949	31703444	-	4153	protein_coding	abhydrolase domain containing 16A [Source:HGNC Symbol;Acc:HGNC:13921]	-
ENSG00000178082	4.82874	6.69686	6.17168	7.63062	6.8642	7.8543	4.36797	5.29234	5.06875	TWF1P1	17	29203426	29204474	-	1049	processed_pseudogene	twinfilin 1 pseudogene 1 [Source:HGNC Symbol;Acc:HGNC:21736]	-
ENSG00000175463	0.95317	0.395356	0.583307	0.113436	0.0957952	0.245533	0.311142	0.260834	0.381598	TBC1D10C	11	67403915	67410089	+	4993	protein_coding	TBC1 domain family member 10C [Source:HGNC Symbol;Acc:HGNC:24702]	-
ENSG00000167114	15.1217	14.2604	17.1012	22.4376	22.4516	22.1545	13.6339	14.7667	14.7641	SLC27A4	9	128340646	128361470	+	3110	protein_coding	solute carrier family 27 member 4 [Source:HGNC Symbol;Acc:HGNC:10998]	-
ENSG00000182809	4.45993	3.52017	4.05891	3.12624	3.37116	4.13813	4.1951	3.73246	4.32799	CRIP2	14	105472962	105480170	+	4837	protein_coding	cysteine rich protein 2 [Source:HGNC Symbol;Acc:HGNC:2361]	-
ENSG00000279045	0	0	0	0	0	0	0	0	0	AP003400.2	11	89548130	89548795	-	666	TEC	novel transcript	-
ENSG00000087460	657.827	689.12	649.512	620.866	611.704	609.833	691.185	685.772	719.045	GNAS	20	58839718	58911192	+	13320	protein_coding	GNAS complex locus [Source:HGNC Symbol;Acc:HGNC:4392]	-
ENSG00000270930	0	0	0	0	0	0	0	0	0.0437497	GRAMD4P8	2	131646704	131648372	-	1115	processed_pseudogene	GRAM domain containing 4 pseudogene 8 [Source:HGNC Symbol;Acc:HGNC:49143]	-
ENSG00000104980	35.3915	38.5626	36.6649	43.0602	44.4103	39.22	36.7181	40.1826	41.8185	TIMM44	19	7926718	7943920	-	4888	protein_coding	translocase of inner mitochondrial membrane 44 [Source:HGNC Symbol;Acc:HGNC:17316]	-
ENSG00000139364	0.403326	0.369802	0.449323	1.21431	1.16485	1.19616	0.320135	0.376129	0.2677	TMEM132B	12	125186836	125662377	+	15703	protein_coding	transmembrane protein 132B [Source:HGNC Symbol;Acc:HGNC:29397]	-
ENSG00000264491	0	0	0	0	0	0	0	0	0	AC005544.1	17	67019934	67021743	-	460	antisense	novel transcript	-
ENSG00000251179	0.557015	0.53909	0.21054	0.46403	0.653111	0.627746	0.636389	0.333433	0.780495	TMEM92-AS1	17	50281577	50287855	-	750	antisense	TMEM92 antisense RNA 1 [Source:HGNC Symbol;Acc:HGNC:50442]	-
ENSG00000100583	1.26339	0.883085	0.672086	0.701658	0.625459	1.01249	0.416989	0.806693	0.655658	SAMD15	14	77376689	77391497	+	2616	protein_coding	sterile alpha motif domain containing 15 [Source:HGNC Symbol;Acc:HGNC:18631]	-
ENSG00000239389	0	0	0	0	0	0	0	0	0	PCDHA13	5	140882208	141012344	+	5354	protein_coding	protocadherin alpha 13 [Source:HGNC Symbol;Acc:HGNC:8667]	-
ENSG00000253485	0.307403	0.384285	0.387306	0.82517	0.564684	0.381082	0.245846	0.380296	0.0837544	PCDHGA5	5	141364232	141512979	+	5733	protein_coding	protocadherin gamma subfamily A, 5 [Source:HGNC Symbol;Acc:HGNC:8703]	-
ENSG00000152404	2.16445	1.89634	2.6639	2.83439	2.32948	2.54714	2.41561	2.29126	1.95805	CWF19L2	11	107326345	107457844	-	3581	protein_coding	CWF19 like cell cycle control factor 2 [Source:HGNC Symbol;Acc:HGNC:26508]	-
ENSG00000261664	0	0	0	0	0	0	0	0	0	TTC39A-AS1	1	51329654	51335324	+	1222	antisense	TTC39A antisense RNA 1 [Source:HGNC Symbol;Acc:HGNC:40851]	-
ENSG00000184845	0	0	0	0	0	0	0.0117734	0	0	DRD1	5	175440039	175444208	-	4054	protein_coding	dopamine receptor D1 [Source:HGNC Symbol;Acc:HGNC:3020]	-
ENSG00000269190	9.37284	9.96837	9.06663	12.1652	9.88683	12.6911	9.88474	10.0622	8.30655	FBXO17	19	38941401	38975910	-	4960	protein_coding	F-box protein 17 [Source:HGNC Symbol;Acc:HGNC:18754]	-
ENSG00000203663	0	0	0	0.0180136	0	0.0292428	0	0	0	OR2L2	1	248030070	248042305	+	4375	protein_coding	olfactory receptor family 2 subfamily L member 2 [Source:HGNC Symbol;Acc:HGNC:8266]	-
ENSG00000185156	0	0.0230986	0	0	0	0	0	0	0.0222948	MFSD6L	17	8797162	8799349	-	2188	protein_coding	major facilitator superfamily domain containing 6 like [Source:HGNC Symbol;Acc:HGNC:26656]	-
ENSG00000238906	0	0	0	0	0	0	0	0	0	RF01210	7	29912528	29912632	+	105	snoRNA		-
ENSG00000183379	0	0	0	0	0.0266503	0	0	0	0	SYNDIG1L	14	74405893	74426102	-	2612	protein_coding	synapse differentiation inducing 1 like [Source:HGNC Symbol;Acc:HGNC:32388]	-
ENSG00000222664	0	0	0	0	0	0	0	0	0	RN7SKP123	1	93026252	93026542	+	291	misc_RNA	RNA, 7SK small nuclear pseudogene 123 [Source:HGNC Symbol;Acc:HGNC:45847]	-
ENSG00000235623	0	0	0	0	0	0	0	0	0	OR7E110P	10	14986942	14987515	-	574	unprocessed_pseudogene	olfactory receptor family 7 subfamily E member 110 pseudogene [Source:HGNC Symbol;Acc:HGNC:15126]	-
ENSG00000271632	0	0	0	0	0	0	0	0	0	AL589743.3	14	19199763	19200279	-	517	processed_pseudogene	tetratricopeptide repeat domain 34 (TTC34) pseudogene	-
ENSG00000255398	0	0.0236498	0	0	0	0	0	0	0	HCAR3	12	122714756	122716892	-	2137	protein_coding	hydroxycarboxylic acid receptor 3 [Source:HGNC Symbol;Acc:HGNC:16824]	-
ENSG00000228061	0.18355	0.0888219	0	0.13592	0.0860866	0.0275811	0.0279609	0.234399	0.057154	AC131571.1	11	31618124	31767953	-	4246	antisense	novel transcript, antisense to ELP4	-
ENSG00000268751	0.308386	0.198975	0.310836	0	0	0	0.0939551	0.196909	0.192051	SCGB1B2P	19	34576733	34577701	-	616	lincRNA	secretoglobin family 1B member 2, pseudogene [Source:HGNC Symbol;Acc:HGNC:20741]	-
ENSG00000075223	105.02	112.414	108.426	135.457	125.232	137.2	111.816	97.6236	106.119	SEMA3C	7	80742538	80922359	-	6268	protein_coding	semaphorin 3C [Source:HGNC Symbol;Acc:HGNC:10725]	-
ENSG00000252261	0	0	0	0	0	0	0	0	0	RNA5SP262	8	32192028	32192153	-	126	rRNA_pseudogene	RNA, 5S ribosomal pseudogene 262 [Source:HGNC Symbol;Acc:HGNC:43162]	-
ENSG00000259508	0	0	0	0	0	0	0	0	0	AL132801.1	14	102770040	102774791	-	1006	lincRNA	novel transcript	-
ENSG00000256734	0	0	0	0	0	0	0	0	0	AC027544.3	11	18450112	18450868	-	757	processed_pseudogene	WW domain binding protein 2 (WBP2) pseudogene	-
ENSG00000259817	0	0	0	0	0	0	0	0	0	AC087565.1	16	73812621	73816053	+	391	lincRNA	novel transcript	-
ENSG00000213763	2.92953	1.30512	0.984268	2.06603	1.70111	1.59312	1.10504	1.87055	2.34566	ACTBP2	5	77784881	77786003	+	1123	processed_pseudogene	actin, beta pseudogene 2 [Source:HGNC Symbol;Acc:HGNC:135]	-
ENSG00000236810	0	0.197678	0.137249	0.226873	0.19159	0.552449	0.124457	0.717295	0.763196	ELOA-AS1	1	23760382	23778287	-	1347	antisense	ELOA antisense RNA 1 [Source:HGNC Symbol;Acc:HGNC:50582]	-
ENSG00000233448	0	0	0	0	0	0	0	0	0	PMS2P9	7	77039944	77043776	+	515	transcribed_unprocessed_pseudogene	PMS1 homolog 2, mismatch repair system component pseudogene 9 [Source:HGNC Symbol;Acc:HGNC:9135]	-
ENSG00000111783	0	0	0	0	0	0.0294993	0	0	0	RFX4	12	106582907	106762803	+	6783	protein_coding	regulatory factor X4 [Source:HGNC Symbol;Acc:HGNC:9985]	RFX
ENSG00000233238	0	0	0	0	0	0	0	0	0	DEFA9P	8	6959289	6960161	-	285	unprocessed_pseudogene	defensin alpha 9, pseudogene [Source:HGNC Symbol;Acc:HGNC:31800]	-
ENSG00000196839	7.05543	7.74204	6.41034	6.34675	4.10136	6.62986	6.31242	8.94654	7.65828	ADA	20	44619522	44652233	-	2852	protein_coding	adenosine deaminase [Source:HGNC Symbol;Acc:HGNC:186]	-
ENSG00000201000	0	0	0	0	0	0	0	0	0	RNA5SP516	X	142411053	142411171	+	119	rRNA_pseudogene	RNA, 5S ribosomal pseudogene 516 [Source:HGNC Symbol;Acc:HGNC:43416]	-
ENSG00000156017	11.7977	11.5216	14.0486	15.333	14.1781	15.7017	10.5386	11.5813	9.69621	CARNMT1	9	74981020	75028423	-	4610	protein_coding	carnosine N-methyltransferase 1 [Source:HGNC Symbol;Acc:HGNC:23435]	-
ENSG00000259170	0	0	0	0	0	0	0	0	0	AC090985.1	15	92470233	92471546	-	480	lincRNA	uncharacterized LOC104613533 [Source:NCBI gene;Acc:104613533]	-
ENSG00000105619	28.4244	29.29	27.6333	33.0885	33.342	33.3312	25.7629	32.5097	29.6566	TFPT	19	54107013	54115675	-	1240	protein_coding	TCF3 fusion partner [Source:HGNC Symbol;Acc:HGNC:13630]	-
ENSG00000165684	7.38318	6.76701	7.34326	8.23711	7.78168	7.52355	6.65885	6.33773	6.83603	SNAPC4	9	136375577	136400168	-	5045	protein_coding	small nuclear RNA activating complex polypeptide 4 [Source:HGNC Symbol;Acc:HGNC:11137]	MYB
ENSG00000199279	0	0	0	0	0	0	0	0	0	RNU6-661P	5	62443176	62443282	+	107	snRNA	RNA, U6 small nuclear 661, pseudogene [Source:HGNC Symbol;Acc:HGNC:47624]	-
ENSG00000264582	0	0	0	0	0	0	0	0	0	RN7SL326P	1	40804846	40805141	+	296	misc_RNA	RNA, 7SL, cytoplasmic 326, pseudogene [Source:HGNC Symbol;Acc:HGNC:46342]	-
ENSG00000130762	0	0	0	0	0.0271075	0	0	0	0	ARHGEF16	1	3454426	3481113	+	5563	protein_coding	Rho guanine nucleotide exchange factor 16 [Source:HGNC Symbol;Acc:HGNC:15515]	-
ENSG00000257465	0	0	0	0	0	0	0	0	0	ELOCP32	12	117245551	117246164	-	324	processed_pseudogene	elongin C pseudogene 32 [Source:HGNC Symbol;Acc:HGNC:49173]	-
ENSG00000226078	0	0	0	0	0	0	0	0	0	AL356309.1	9	126527618	126530343	+	339	lincRNA	novel transcript	-
ENSG00000182621	9.40137	8.57105	8.99235	7.36556	6.24056	8.08282	7.27701	7.12411	8.04865	PLCB1	20	8077251	8968360	+	17412	protein_coding	phospholipase C beta 1 [Source:HGNC Symbol;Acc:HGNC:15917]	-
ENSG00000171431	0.051096	0	0	0.11351	0	0.0921349	0	0	0	KRT20	17	40875941	40885227	-	1846	protein_coding	keratin 20 [Source:HGNC Symbol;Acc:HGNC:20412]	-
ENSG00000224743	0.0563932	0.0545785	0	0	0.0528977	0	0	0	0	TEX26-AS1	13	30881933	30933846	-	6510	antisense	TEX26 antisense RNA 1 [Source:HGNC Symbol;Acc:HGNC:42784]	-
ENSG00000279300	0	0	0	0	0	0	0	0	0	AC008761.3	19	17622447	17623338	+	892	TEC	TEC	-
ENSG00000279516	0	0	0	0	0	0	0	0	0	FAM230C	13	18195297	18232024	+	1970	lincRNA	family with sequence similarity 230 member C [Source:HGNC Symbol;Acc:HGNC:24482]	-
ENSG00000136457	0.114018	0.110349	0.114923	0.168861	0.249551	0.205594	0.173687	0.072802	0.142011	CHAD	17	50464496	50468966	-	1802	protein_coding	chondroadherin [Source:HGNC Symbol;Acc:HGNC:1909]	-
ENSG00000239525	0	0	0	0	0	0	0	0	0	RPL30P5	4	83502699	83503034	+	336	processed_pseudogene	ribosomal protein L30 pseudogene 5 [Source:HGNC Symbol;Acc:HGNC:36302]	-
ENSG00000188051	0.162553	0.393305	0.0819221	0.0451391	0.0381193	0.0366389	0.297147	0.116767	0.531466	TMEM221	19	17435509	17448567	-	2317	protein_coding	transmembrane protein 221 [Source:HGNC Symbol;Acc:HGNC:21943]	-
ENSG00000253340	0	0	0	0	0	0	0	0	0	AC087272.1	8	50859530	50860062	+	533	processed_pseudogene	programmed cell death 10 (PDCD10) pseudogene	-
ENSG00000280211	0.0417427	0.0201997	0.105186	0.0463659	0.137044	0.0752693	0.0190764	0	0.116981	AC106886.4	16	30773532	30776033	-	2502	TEC	novel transcript, antisense to RNF40	-
ENSG00000224670	0	0	0	0	0	0	0	0	0	AC068135.1	2	194027919	194028164	+	246	processed_pseudogene	S-phase kinase-associated protein 1 (SKP1) pseudogene	-
ENSG00000229976	0	0	0	0	0	0	0	0	0	AL118523.1	20	39785721	39813229	+	480	lincRNA	novel transcript	-
ENSG00000213820	0	0	0	0	0	0	0	0	0	RPL13P2	20	46099518	46100176	+	659	processed_pseudogene	ribosomal protein L13 pseudogene 2 [Source:HGNC Symbol;Acc:HGNC:16342]	-
ENSG00000234409	0.0496389	0.0480415	0.0500332	0.0551367	0.139686	0.0895075	0.13611	0.0475428	0.0927394	CCDC188	22	20148427	20151065	-	1598	protein_coding	coiled-coil domain containing 188 [Source:HGNC Symbol;Acc:HGNC:51899]	-
ENSG00000199405	0	0	0	0	0	0	0	0	0	SNORA1B	8	55902723	55902855	-	133	snoRNA	small nucleolar RNA, H/ACA box 1B [Source:HGNC Symbol;Acc:HGNC:52193]	-
ENSG00000261229	0.275568	0.066675	0.555514	0.0765221	0.0646218	0.248448	0.188902	0.197949	0.0643548	AC021483.2	15	79843547	79844304	-	758	lincRNA	novel transcript	-
ENSG00000225298	0	0	0	0	0	0	0	0	0	LINC00113	21	27722379	27751233	+	611	lincRNA	long intergenic non-protein coding RNA 113 [Source:HGNC Symbol;Acc:HGNC:1264]	-
ENSG00000181359	0	0	0	0	0	0	0	0	0	HSP90AA6P	4	170581470	170605450	-	853	transcribed_processed_pseudogene	heat shock protein 90 alpha family class A member 6, pseudogene [Source:HGNC Symbol;Acc:HGNC:32536]	-
ENSG00000130640	27.4561	29.3505	31.3854	37.6871	40.6275	39.9242	28.7678	31.2072	29.2168	TUBGCP2	10	133278630	133312337	-	7697	protein_coding	tubulin gamma complex associated protein 2 [Source:HGNC Symbol;Acc:HGNC:18599]	-
ENSG00000239862	0	0	0	0	0	0	0	0	0	IGKV1-37	2	89297264	89297785	-	398	IG_V_gene	immunoglobulin kappa variable 1-37 (non-functional) [Source:HGNC Symbol;Acc:HGNC:5739]	-
ENSG00000221240	0	0	0	0	0	0	0	0	0	MIR1258	2	179860836	179860908	-	73	miRNA	microRNA 1258 [Source:HGNC Symbol;Acc:HGNC:35323]	-
ENSG00000255036	0	0.025646	0	0	0	0.00796362	0	0	0	STRA6LP	9	97238497	97377287	+	7116	processed_transcript	STRA6 like, pseudogene [Source:HGNC Symbol;Acc:HGNC:53830]	-
ENSG00000253089	0	0	0	0	0	0	0	0	0	RNU1-104P	12	127321355	127321529	+	175	snRNA	RNA, U1 small nuclear 104, pseudogene [Source:HGNC Symbol;Acc:HGNC:48446]	-
ENSG00000238245	0	0	0	0	0	0	0	0.039166	0	MYO5BP2	9	62857208	62858484	+	1277	processed_pseudogene	myosin VB pseudogene 2 [Source:HGNC Symbol;Acc:HGNC:38496]	-
ENSG00000265932	0	0	0	0	0	0	0	0	0	MIR3146	7	19705358	19705436	-	79	miRNA	microRNA 3146 [Source:HGNC Symbol;Acc:HGNC:38368]	-
ENSG00000248837	0	0	0	0	0	0	0	0	0	AC097512.1	4	22997551	23056862	+	2175	lincRNA	uncharacterized LOC105374524 [Source:NCBI gene;Acc:105374524]	-
ENSG00000250037	0	0	0	0	0	0	0	0	0	AC091965.2	5	8455946	8456558	-	613	unprocessed_pseudogene	FAST kinase domains 3 (FASTKD3) pseudogene	-
ENSG00000249028	0	0	0	0	0	0	0	0	0	AC004672.1	12	1380060	1391502	-	2088	antisense	novel transcript	-
ENSG00000225787	0	0	0	0	0	0	0	0	0	LSM3P3	2	85102389	85102694	-	306	processed_pseudogene	LSM3 homolog, U6 small nuclear RNA and mRNA degradation associated pseudogene 3 [Source:HGNC Symbol;Acc:HGNC:44348]	-
ENSG00000256546	2.94304	1.67979	2.28186	2.93372	1.69884	1.83697	1.79329	2.67421	1.9033	AC156455.1	12	122063306	122068616	+	1831	processed_transcript	uncharacterized LOC100506691 [Source:NCBI gene;Acc:100506691]	-
ENSG00000171865	20.5632	21.8571	23.7217	24.1609	29.0629	28.863	22.3798	22.8824	20.7634	RNASEH1	2	3544793	3558616	-	2865	protein_coding	ribonuclease H1 [Source:HGNC Symbol;Acc:HGNC:18466]	-
ENSG00000250934	0.110169	0.106624	0.111044	0	0.10334	0	0.100694	0.105517	0.102913	AC016924.1	3	126266796	126291279	+	795	lincRNA	novel transcript	-
ENSG00000200089	0	0	0.701799	0	0	0	0	0	0	SNORD114-31	14	100993236	100993310	+	75	snoRNA	small nucleolar RNA, C/D box 114-31 [Source:HGNC Symbol;Acc:HGNC:33019]	-
ENSG00000240698	0	0	0	0	0	0	0	0	0	RPS2P39	11	108690289	108690956	-	668	processed_pseudogene	ribosomal protein S2 pseudogene 39 [Source:HGNC Symbol;Acc:HGNC:36131]	-
ENSG00000105205	0	0	0	0	0	0	0	0	0	CLC	19	39731250	39738028	-	635	protein_coding	Charcot-Leyden crystal galectin [Source:HGNC Symbol;Acc:HGNC:2014]	-
ENSG00000236299	0	0	0	0	0	0	0	0	0	AC092634.5	7	63888200	63900794	-	1856	lincRNA	novel transcript	-
ENSG00000278797	0	0	0	0	0	0	0	0	0	AC011551.1	19	46533669	46534351	+	683	unprocessed_pseudogene	paraneoplastic Ma antigen family-like 2 (PNMAL2) pseudogene	-
ENSG00000224510	0	0	0	0	0	0	0	0	0	POLR2KP2	13	48134358	48134534	-	177	processed_pseudogene	RNA polymerase II subunit K pseudogene 2 [Source:HGNC Symbol;Acc:HGNC:42652]	-
ENSG00000237200	0.382565	0.185127	0	0	0.179426	0.172458	0.174832	0	0.35737	ZBTB40-IT1	1	22517474	22519708	+	273	sense_intronic	ZBTB40 intronic transcript 1 [Source:HGNC Symbol;Acc:HGNC:41493]	-
ENSG00000154813	30.4037	33.3686	36.1297	39.4712	39.0657	39.3155	33.4458	34.8006	32.7856	DPH3	3	16257978	16264972	-	3562	protein_coding	diphthamide biosynthesis 3 [Source:HGNC Symbol;Acc:HGNC:27717]	-
ENSG00000219445	0	0	0	0	0	0	0	0	0	AC019155.2	7	125229579	125264291	-	1918	lincRNA	uncharacterized LOC101928254 [Source:NCBI gene;Acc:101928254]	-
ENSG00000271018	0	0.261863	0	0	0	0	0	0	0	AC013244.1	12	50756892	50757433	+	193	processed_pseudogene	mitochondrial inner membrane organizing system 1 (MINOS1) pseudogene	-
ENSG00000273204	0	0	0	0	0	0	0	0	0	AC104506.1	1	100894928	100895356	+	429	antisense	novel transcript, antisense to EXTL2	-
ENSG00000144120	3.82721	2.79861	3.72902	5.47918	5.06586	5.21418	3.3426	4.2358	3.69432	TMEM177	2	119679167	119686507	+	2588	protein_coding	transmembrane protein 177 [Source:HGNC Symbol;Acc:HGNC:28143]	-
ENSG00000183248	0.164387	0.212129	0.0552308	0.0811525	0.017133	0.164676	0.133555	0.0699755	0.068249	PRR36	19	7868719	7874379	-	4456	protein_coding	proline rich 36 [Source:HGNC Symbol;Acc:HGNC:26172]	-
ENSG00000228820	0	0	0	0	0	0	0	0	0	RPSAP1	20	51130788	51131667	-	880	processed_pseudogene	ribosomal protein SA pseudogene 1 [Source:HGNC Symbol;Acc:HGNC:16560]	-
ENSG00000006116	0	0	0	0	0	0	0	0	0	CACNG3	16	24255553	24362801	+	3088	protein_coding	calcium voltage-gated channel auxiliary subunit gamma 3 [Source:HGNC Symbol;Acc:HGNC:1407]	-
ENSG00000270812	0	0	0	0	0	0	0	0	0	AC002069.2	7	88455309	88456191	+	883	processed_pseudogene	polymerase (RNA) III (DNA directed) polypeptide F, 39 kDa, pseudogene	-
ENSG00000251895	0	0	0	0	0	0	0	0	0	RNU6-976P	14	84739942	84740052	+	111	snRNA	RNA, U6 small nuclear 976, pseudogene [Source:HGNC Symbol;Acc:HGNC:47939]	-
ENSG00000201502	0	0	0	0	0	0	0	0	0	RF00284	12	93266017	93266096	+	80	snoRNA		-
ENSG00000146205	0.678183	1.04421	0.807856	0.410889	0.578315	0.389099	1.04249	0.472397	0.691111	ANO7	2	241188509	241225377	+	5695	protein_coding	anoctamin 7 [Source:HGNC Symbol;Acc:HGNC:31677]	-
ENSG00000272398	0.1432	0.0923942	0.0962247	0.318119	0.716392	0.68857	0.0872563	0.320023	0.178358	CD24	6	106969831	106975627	-	3097	protein_coding	CD24 molecule [Source:HGNC Symbol;Acc:HGNC:1645]	-
ENSG00000280018	0	0.0651284	0	0.0747471	0.0631228	0	0	0	0	CU634019.6	21	6986450	6997765	-	1788	lincRNA	uncharacterized LOC105379499 [Source:NCBI gene;Acc:105379499]	-
ENSG00000267680	4.73383	4.00881	3.87679	2.79338	3.46907	2.56745	3.27885	2.4795	3.31655	ZNF224	19	44094339	44109886	+	7104	protein_coding	zinc finger protein 224 [Source:HGNC Symbol;Acc:HGNC:13017]	zf-C2H2
ENSG00000205744	0.155881	0	0	0	0	0	0	0	0	DENND1C	19	6467207	6482557	-	4657	protein_coding	DENN domain containing 1C [Source:HGNC Symbol;Acc:HGNC:26225]	-
ENSG00000270434	0	0	0	0	0	0	0	0	0	AC012044.1	10	45812648	45812944	-	297	processed_pseudogene	ataxin 1-like (ATXN1L) pseudogene	-
ENSG00000262380	0	0	0.209284	0	0	0	0	0	0	AC026401.2	16	15683290	15684570	+	503	sense_intronic	novel transcript, sense to NDE1	-
ENSG00000201448	0	0	0	0	0.379715	0.364969	0	0.387713	0.378147	SNORA63C	1	36418450	36418578	-	129	snoRNA	small nucleolar RNA, H/ACA box 63C [Source:HGNC Symbol;Acc:HGNC:52210]	-
ENSG00000254724	0	0	0	0	0	0	0	0	0	OR7E10P	8	12703066	12704056	-	991	unprocessed_pseudogene	olfactory receptor family 7 subfamily E member 10 pseudogene [Source:HGNC Symbol;Acc:HGNC:8381]	-
ENSG00000266673	0	0	0	0	0	0	0	0	0	AC233702.8	17	21552509	21552711	+	203	processed_pseudogene	ribonuclease P/MRP 40kDa subunit (RPP40) pseudogene	-
ENSG00000186472	0.0805711	0.00974728	0.0203028	0.0335605	0.0188942	0	0.0276157	0.0578766	0.0282243	PCLO	7	82754013	83162930	-	22873	protein_coding	piccolo presynaptic cytomatrix protein [Source:HGNC Symbol;Acc:HGNC:13406]	-
ENSG00000200394	0	0.385799	0	0	0	0	0	0	0	SNORA38B	17	67740669	67740799	+	131	snoRNA	small nucleolar RNA, H/ACA box 38B [Source:HGNC Symbol;Acc:HGNC:33617]	-
ENSG00000267682	0	0.404317	0.28072	0	0.522488	0	0.254556	0.133373	0.650413	AC016590.2	19	37337236	37337743	+	375	sense_intronic	novel transcript, sense intronic to HKR1	-
ENSG00000211934	0	0	0	0	0	0	0	0	0	IGHV1-2	14	105986582	105987083	-	417	IG_V_gene	immunoglobulin heavy variable 1-2 [Source:HGNC Symbol;Acc:HGNC:5550]	-
ENSG00000099889	3.50079	2.96462	3.88146	3.82371	3.50272	3.44559	2.42646	3.74414	2.56168	ARVCF	22	19969896	20016808	-	5621	protein_coding	ARVCF, delta catenin family member [Source:HGNC Symbol;Acc:HGNC:728]	-
ENSG00000237370	0	0	0	0	0	0	0	0	0	AC010907.2	2	3603397	3604242	-	693	antisense	novel transcript	-
ENSG00000225906	0	0	0	0	0	0	0	0	0	AP000949.1	21	22882582	22884000	+	629	processed_pseudogene	glomulin, FKBP associated protein (GLMN) pseudogene	-
ENSG00000200151	0	0	0	0	0	0	0	0	0	RN7SKP231	8	91594965	91595241	+	277	misc_RNA	RNA, 7SK small nuclear pseudogene 231 [Source:HGNC Symbol;Acc:HGNC:45955]	-
ENSG00000235224	0	0	0	0	0	0	0	0	0	AL591212.2	X	53113018	53113274	-	257	processed_pseudogene	ribosomal protein L27 (RPL27) pseudogene	-
ENSG00000226426	0	0	0	0	0	0	0	0	0	AC012558.1	10	64036345	64037280	-	622	lincRNA	novel transcript	-
ENSG00000258561	0	0.156712	0	0.0899283	0.227829	0.218981	0.0739987	0.0775426	0	AL359232.1	14	66212810	66509394	-	1797	lincRNA	novel transcript	-
ENSG00000201160	0	0	0	0	0	0	0	0	0	RF00019	2	25697076	25697188	-	113	misc_RNA		-
ENSG00000171102	0	0	0	0	0	0	0	0	0	OBP2B	9	133205277	133209250	-	1135	protein_coding	odorant binding protein 2B [Source:HGNC Symbol;Acc:HGNC:23381]	-
ENSG00000157927	0.9602	0.857816	0.69485	0.656337	0.554266	0.754716	0.697598	0.801749	0.919961	RADIL	7	4797055	4883719	-	6516	protein_coding	Rap associating with DIL domain [Source:HGNC Symbol;Acc:HGNC:22226]	-
ENSG00000279392	0	0	0.113193	0.249479	0.421362	0.607496	0.30793	0.215118	0.419621	AL158801.5	14	55229217	55229681	+	465	processed_pseudogene	ubiquitin-conjugating enzyme E2L 3 (UBE2L3) pseudogene	-
ENSG00000156136	6.67667	6.90177	6.07106	15.3372	14.7376	14.2933	6.46603	5.57839	6.31657	DCK	4	70992538	71030914	+	3227	protein_coding	deoxycytidine kinase [Source:HGNC Symbol;Acc:HGNC:2704]	-
ENSG00000216835	0	0	0	0	0	0	0	0	0	RBMXP1	6	48213604	48214794	-	1191	processed_pseudogene	RBMX pseudogene 1 [Source:HGNC Symbol;Acc:HGNC:9911]	-
ENSG00000267375	0	0	0	0	0	0.194549	0	0	0	AC008649.2	19	38683873	38693606	-	242	antisense	novel transcript, antisense to ACTN4	-
ENSG00000233677	0	0	0	0	0	0	0	0	0	DDX39BP1	6	29906543	29906909	+	192	unprocessed_pseudogene	DEAD-box helicase 39B pseudogene 1 [Source:HGNC Symbol;Acc:HGNC:33450]	-
ENSG00000230712	0.0786447	0	0	0	0	0	0.143763	0	0.146931	GGTLC4P	22	24248074	24249466	-	664	unprocessed_pseudogene	gamma-glutamyltransferase light chain 4 pseudogene [Source:HGNC Symbol;Acc:HGNC:33428]	-
ENSG00000130768	0	0.105437	0.0366029	0	0.0340635	0	0.0663827	0	0	SMPDL3B	1	27934993	27959157	+	2670	protein_coding	sphingomyelin phosphodiesterase acid like 3B [Source:HGNC Symbol;Acc:HGNC:21416]	-
ENSG00000209042	0	0	0	0	0.550374	0	0.536283	0	1.0962	SNORD12C	20	49278940	49279028	+	89	snoRNA	small nucleolar RNA, C/D box 12C [Source:HGNC Symbol;Acc:HGNC:10105]	-
ENSG00000200314	0	0	0	0	0	0	0	0	0	RF00019	6	106454828	106454929	+	102	misc_RNA		-
ENSG00000213026	0	0	0	0	0	0	0	0	0	CFL1P4	1	241993185	241993682	+	498	processed_pseudogene	cofilin 1 pseudogene 4 [Source:HGNC Symbol;Acc:HGNC:1880]	-
ENSG00000258239	0	0	0	0	0	0	0	0	0	MTND2P17	12	41698495	41699182	-	688	unprocessed_pseudogene	MT-ND2 pseudogene 17 [Source:HGNC Symbol;Acc:HGNC:42118]	-
ENSG00000142949	138.151	138.286	126.271	130.909	130.018	132.869	130.297	116.879	122.014	PTPRF	1	43525187	43623666	+	10712	protein_coding	protein tyrosine phosphatase, receptor type F [Source:HGNC Symbol;Acc:HGNC:9670]	-
ENSG00000173137	6.33286	5.97835	5.12746	8.07209	7.44975	7.81562	5.17145	6.11515	6.64313	ADCK5	8	144373101	144393242	+	2742	protein_coding	aarF domain containing kinase 5 [Source:HGNC Symbol;Acc:HGNC:21738]	-
ENSG00000253641	0	0.185808	0	0	0	0	0	0.0919393	0	LINCR-0001	8	10474565	10481974	+	1271	lincRNA	uncharacterized LINCR-0001 [Source:NCBI gene;Acc:101929191]	-
ENSG00000227248	0	0	0	0	0	0	0	0	0	FAM155A-IT1	13	107788342	107835451	-	819	sense_intronic	FAM155A intronic transcript 1 [Source:HGNC Symbol;Acc:HGNC:41503]	-
ENSG00000242221	0	0	0	0	0.0553484	0.265994	0	0	0.0551197	PSG2	19	43064211	43083045	-	2798	protein_coding	pregnancy specific beta-1-glycoprotein 2 [Source:HGNC Symbol;Acc:HGNC:9519]	-
ENSG00000271716	0.270104	0.697099	0.1815	0.200013	0.168908	0.243522	0.905209	0.344931	0.756946	AC022001.2	3	11607184	11610748	+	580	antisense	novel transcript, antisense to VGLL4	-
ENSG00000223896	0	0	0	0	0	0	0	0	0	CCNJP2	1	92755794	92756956	+	1163	processed_pseudogene	cyclin J pseudogene 2 [Source:HGNC Symbol;Acc:HGNC:37997]	-
ENSG00000237923	0	0.0632536	0	0	0	0	0	0	0	LINC02570	6	30839526	30848159	-	799	lincRNA	long intergenic non-protein coding RNA 2570 [Source:HGNC Symbol;Acc:HGNC:39766]	-
ENSG00000207574	0.586743	0.567861	0	0	0	0	0.536283	0	0	MIR661	8	143945191	143945279	-	89	miRNA	microRNA 661 [Source:HGNC Symbol;Acc:HGNC:32917]	-
ENSG00000224769	0.0932502	0	0.156652	0.0345261	0.0874702	0.0560487	0	0.0893125	0	MUC20P1	3	195614947	195620233	+	1680	unprocessed_pseudogene	mucin 20, cell surface associated pseudogene 1 [Source:HGNC Symbol;Acc:HGNC:51921]	-
ENSG00000280026	0	0	0	0	0	0	0	0	0	AC005618.3	5	141350109	141350662	-	554	antisense	novel transcript, antisense to PCDHGB1	-
ENSG00000277428	0	0	0	0	0	0	0	0	0	RF00019	GL000195.1	37434	37534	-	101	misc_RNA		-
ENSG00000254178	0	0	0	0	0	0	0	0	0	AC090103.1	8	25834129	25840135	-	485	lincRNA	novel transcript	-
ENSG00000235214	0.445058	0	0	0	0.278314	0.401258	0	0	0	FAM83C-AS1	20	35285251	35285756	+	352	antisense	FAM83C antisense RNA 1 [Source:HGNC Symbol;Acc:HGNC:16113]	-
ENSG00000099957	3.86234	4.2243	3.26001	1.56955	2.23856	1.84021	3.78849	3.8797	2.84531	P2RX6	22	21009808	21028830	+	4730	protein_coding	purinergic receptor P2X 6 [Source:HGNC Symbol;Acc:HGNC:8538]	-
ENSG00000267546	0.580223	0.280776	0.389888	0.107414	0.0907098	0.174374	0.0883874	0.277861	0.18067	AC015802.4	17	76545668	76557683	-	1494	antisense	novel transcript, antisense to PRCD	-
ENSG00000162714	5.02955	5.16572	4.91432	4.81702	5.05479	4.88161	4.99573	4.4608	4.80618	ZNF496	1	247297412	247331846	-	10531	protein_coding	zinc finger protein 496 [Source:HGNC Symbol;Acc:HGNC:23713]	zf-C2H2
ENSG00000215353	0	0	0	0	0	0	0	0	0	C1QBPP1	21	19759359	19760128	-	770	processed_pseudogene	complement C1q binding protein pseudogene 1 [Source:HGNC Symbol;Acc:HGNC:1244]	-
ENSG00000246082	0.552959	1.10378	0.522517	1.49712	1.16704	0.841288	0.821283	0.496509	0.774813	NUDT16P1	3	131361898	131365122	+	2312	transcribed_unitary_pseudogene	nudix hydrolase 16 pseudogene 1 [Source:HGNC Symbol;Acc:HGNC:27189]	-
ENSG00000164180	7.97725	6.32458	6.05272	8.07606	7.041	7.19219	6.24192	6.14615	6.13199	TMEM161B	5	88189633	88269476	-	9598	protein_coding	transmembrane protein 161B [Source:HGNC Symbol;Acc:HGNC:28483]	-
ENSG00000165195	3.03708	2.25445	2.25875	1.93237	2.268	3.34963	2.53334	3.38893	2.50653	PIGA	X	15319451	15335580	-	6321	protein_coding	phosphatidylinositol glycan anchor biosynthesis class A [Source:HGNC Symbol;Acc:HGNC:8957]	-
ENSG00000201876	0	0	0	0	0	0	0	0	0	RNA5SP97	2	73968123	73968206	-	84	rRNA_pseudogene	RNA, 5S ribosomal pseudogene 97 [Source:HGNC Symbol;Acc:HGNC:42895]	-
ENSG00000171872	0.054595	0	0.0275143	0	0	0	0	0	0.0254997	KLF17	1	44118850	44135140	+	3131	protein_coding	Kruppel like factor 17 [Source:HGNC Symbol;Acc:HGNC:18830]	zf-C2H2
ENSG00000141452	20.2112	19.1514	18.9031	24.0682	22.706	20.9343	19.2034	20.3932	18.9679	RMC1	18	23503470	23531807	+	3090	protein_coding	regulator of MON1-CCZ1 [Source:HGNC Symbol;Acc:HGNC:24326]	-
ENSG00000147164	95.1408	87.2328	86.7776	107.034	104.479	100.535	83.6895	89.9141	90.8796	SNX12	X	71056332	71073426	-	2595	protein_coding	sorting nexin 12 [Source:HGNC Symbol;Acc:HGNC:14976]	-
ENSG00000115306	88.2855	81.0824	90.8652	104.939	117.151	114.368	79.9629	77.0351	81.121	SPTBN1	2	54456285	54671445	+	18504	protein_coding	spectrin beta, non-erythrocytic 1 [Source:HGNC Symbol;Acc:HGNC:11275]	-
ENSG00000135269	112.748	116.232	114.84	101.963	99.2511	109.019	113.899	113.233	120.076	TES	7	116210493	116258783	+	4280	protein_coding	testin LIM domain protein [Source:HGNC Symbol;Acc:HGNC:14620]	-
ENSG00000125304	95.6913	95.8166	92.0422	90.0931	93.2079	93.888	100.956	91.505	97.9308	TM9SF2	13	99446311	99564006	+	5524	protein_coding	transmembrane 9 superfamily member 2 [Source:HGNC Symbol;Acc:HGNC:11865]	-
ENSG00000128309	25.1756	28.8613	24.4876	23.0414	23.54	23.4442	24.9383	25.5956	26.6599	MPST	22	37019635	37029822	+	6760	protein_coding	mercaptopyruvate sulfurtransferase [Source:HGNC Symbol;Acc:HGNC:7223]	-
ENSG00000196670	5.01313	4.31272	4.98277	4.40829	4.37584	5.39862	5.28203	3.60108	4.65045	ZFP62	5	180847611	180861285	-	4197	protein_coding	ZFP62 zinc finger protein [Source:HGNC Symbol;Acc:HGNC:23241]	zf-C2H2
ENSG00000008256	57.3892	56.2121	55.3836	60.3547	61.1623	61.1355	54.0906	51.1845	60.3774	CYTH3	7	6161776	6272644	-	5808	protein_coding	cytohesin 3 [Source:HGNC Symbol;Acc:HGNC:9504]	-
ENSG00000136490	10.4623	7.87057	11.1901	11.7733	8.31388	10.6684	8.97793	10.0643	10.7549	LIMD2	17	63695902	63701172	-	4745	protein_coding	LIM domain containing 2 [Source:HGNC Symbol;Acc:HGNC:28142]	-
ENSG00000244213	0	0	0	0	0	0	0	0	0	ZFAND6P1	9	35449748	35450352	+	605	processed_pseudogene	zinc finger AN1-type containing 6 pseudogene 1 [Source:HGNC Symbol;Acc:HGNC:42978]	-
ENSG00000261720	0	0	0	0	0	0	0	0	0	AC009041.3	16	1065240	1066502	+	879	lincRNA	novel transcript	-
ENSG00000169991	9.65312	8.08634	9.21878	9.48333	8.92162	9.14193	9.32341	7.32258	7.88073	IFFO2	1	18904281	18956686	-	6188	protein_coding	intermediate filament family orphan 2 [Source:HGNC Symbol;Acc:HGNC:27006]	-
ENSG00000186174	33.2915	30.1423	33.5559	33.133	33.7097	32.1006	30.2902	26.5424	28.8957	BCL9L	11	118893875	118925608	-	10470	protein_coding	B cell CLL/lymphoma 9 like [Source:HGNC Symbol;Acc:HGNC:23688]	-
ENSG00000272221	1.55752	1.38178	1.65711	1.48974	1.46098	1.71629	1.34448	1.24312	1.13162	AL645933.2	6	31394289	31395495	-	1207	lincRNA	novel transcript	-
ENSG00000205923	0	0	0	0	0	0	0	0	0	CEMP1	16	2530035	2531417	-	1383	protein_coding	cementum protein 1 [Source:HGNC Symbol;Acc:HGNC:32553]	-
ENSG00000167191	14.9536	17.1718	13.9208	9.9659	10.8747	8.75572	17.9368	13.8394	14.8791	GPRC5B	16	19856691	19886167	-	6667	protein_coding	G protein-coupled receptor class C group 5 member B [Source:HGNC Symbol;Acc:HGNC:13308]	-
ENSG00000124664	0	0.0268685	0	0	0	0	0	0	0.103734	SPDEF	6	34537802	34556333	-	1914	protein_coding	SAM pointed domain containing ETS transcription factor [Source:HGNC Symbol;Acc:HGNC:17257]	ETS
ENSG00000131153	1.02152	0.67228	1.07082	6.03639	6.51577	5.3049	0.896323	0.743572	0.954244	GINS2	16	85676198	85690073	-	3264	protein_coding	GINS complex subunit 2 [Source:HGNC Symbol;Acc:HGNC:24575]	-
ENSG00000259334	0	0	0	0	0	0	0	0	0	LINC00596	14	23922247	23934568	-	937	lincRNA	long intergenic non-protein coding RNA 596 [Source:HGNC Symbol;Acc:HGNC:23167]	-
ENSG00000277775	0	0	0.128066	0.141128	0	0	0	0	0.237377	HIST1H3F	6	26250195	26250605	-	411	protein_coding	histone cluster 1 H3 family member f [Source:HGNC Symbol;Acc:HGNC:4773]	-
ENSG00000259135	0.0821071	0	0	0	0	0	0	0	0	AL445363.2	14	34556774	34561298	+	1137	antisense	novel transcript, antisense to SNX6	-
ENSG00000277978	0.546807	0.132303	0.275576	0	0	0.123249	0.249891	0.130929	0.127699	AC010542.5	16	66565620	66566001	-	382	antisense	novel transcript, antisense to CKLF	-
ENSG00000228196	0	0	0	0.216432	0	0	0	0	0	PTPN2P1	1	178746683	178747754	-	1072	processed_pseudogene	protein tyrosine phosphatase, non-receptor type 2 pseudogene 1 [Source:HGNC Symbol;Acc:HGNC:9653]	-
ENSG00000259993	0	0	0	0	0	0	0.0561961	0	0	AC135731.1	15	30223017	30225564	+	2548	processed_pseudogene	hyperpolarization activated cyclic nucleotide-gated potassium channel 2 (HCN2) pseudogene	-
ENSG00000172188	0	0	0	0	0	0	0	0	0	OR4C11	11	55602360	55607645	-	2737	protein_coding	olfactory receptor family 4 subfamily C member 11 [Source:HGNC Symbol;Acc:HGNC:15167]	-
ENSG00000250098	0	0	0	0	0	0	0	0	0	AC007370.1	4	12947574	12948670	-	316	lincRNA	novel transcript	-
ENSG00000106028	46.3558	44.3235	44.1345	54.5918	50.9741	53.4255	44.309	48.6777	54.0503	SSBP1	7	141738321	141787922	+	4988	protein_coding	single stranded DNA binding protein 1 [Source:HGNC Symbol;Acc:HGNC:11317]	-
ENSG00000187902	0.0375055	0	0	0.0138865	0	0.0112715	0	0	0	SHISA7	19	55428740	55442863	-	6083	protein_coding	shisa family member 7 [Source:HGNC Symbol;Acc:HGNC:35409]	-
ENSG00000131370	6.38883	5.55381	6.05398	4.41933	4.01914	4.41492	7.34295	6.5221	7.57623	SH3BP5	3	15254853	15341368	-	4159	protein_coding	SH3 domain binding protein 5 [Source:HGNC Symbol;Acc:HGNC:10827]	-
ENSG00000250709	0	0	0	0	0	0	0	0	0	CCDC169-SOHLH2	13	36168794	36297842	-	2051	protein_coding	CCDC169-SOHLH2 readthrough [Source:HGNC Symbol;Acc:HGNC:38866]	bHLH
ENSG00000137491	0.128069	0	0.0645431	0	0.0300327	0.144332	0.146319	0.275987	0.0598172	SLCO2B1	11	75100563	75206549	+	10351	protein_coding	solute carrier organic anion transporter family member 2B1 [Source:HGNC Symbol;Acc:HGNC:10962]	-
ENSG00000166902	26.2714	31.4858	34.4176	35.9924	37.1764	38.1187	27.139	34.1264	30.9931	MRPL16	11	59806135	59810872	-	2271	protein_coding	mitochondrial ribosomal protein L16 [Source:HGNC Symbol;Acc:HGNC:14476]	-
ENSG00000161791	4.31667	3.67306	3.69393	5.00393	4.63337	5.015	3.82628	3.59331	3.89706	FMNL3	12	49636499	49708165	-	13424	protein_coding	formin like 3 [Source:HGNC Symbol;Acc:HGNC:23698]	-
ENSG00000285608	0	0	0	0	0	0	0	0.0127006	0	AL161665.1	14	32149176	32158008	-	3938	antisense	novel transcript, antisense to ARHGAP5	-
ENSG00000174957	0	0	0	0	0	0	0	0	0	OR5J2	11	56176618	56177556	+	939	protein_coding	olfactory receptor family 5 subfamily J member 2 [Source:HGNC Symbol;Acc:HGNC:19612]	-
ENSG00000229549	0	0	0	0	0	0	0	0	0	TSPY8	Y	9357797	9360599	+	1941	protein_coding	testis specific protein Y-linked 8 [Source:HGNC Symbol;Acc:HGNC:37471]	-
ENSG00000225347	0	0	0	0	0	0	0	0	0	SLC25A5P8	9	32333457	32334354	-	898	processed_pseudogene	solute carrier family 25 member 5 pseudogene 8 [Source:HGNC Symbol;Acc:HGNC:35469]	-
ENSG00000127129	0.0786447	0	0	0	0	0.28362	0	0	0.220396	EDN2	1	41478775	41484673	-	1639	protein_coding	endothelin 2 [Source:HGNC Symbol;Acc:HGNC:3177]	-
ENSG00000278531	0	0	0	0	0	0	0	0	0	AL512324.3	10	45187292	45198323	-	882	unprocessed_pseudogene	ankyrin repeat domain 30B-like (ANKRD30BL) pseudogene	-
ENSG00000251576	0	0	0	0	0	0	0	0	0	LINC01267	3	14348451	14352568	-	2284	lincRNA	long intergenic non-protein coding RNA 1267 [Source:HGNC Symbol;Acc:HGNC:50320]	-
ENSG00000202386	0	0	0	0	0	0	0	0	0	RNA5SP211	6	106449381	106449497	+	117	rRNA_pseudogene	RNA, 5S ribosomal pseudogene 211 [Source:HGNC Symbol;Acc:HGNC:43111]	-
ENSG00000199092	0	0	0	0	0	0	0	0	0	MIR410	14	101065912	101065991	+	80	miRNA	microRNA 410 [Source:HGNC Symbol;Acc:HGNC:32065]	-
ENSG00000167840	1.95962	2.35313	2.67015	2.05573	1.97431	2.29025	2.15594	1.98114	2.27125	ZNF232	17	5105541	5123116	-	2794	protein_coding	zinc finger protein 232 [Source:HGNC Symbol;Acc:HGNC:13026]	zf-C2H2
ENSG00000184828	0	0	0	0	0	0	0	0	0	ZBTB7C	18	48026673	48410752	-	7648	protein_coding	zinc finger and BTB domain containing 7C [Source:HGNC Symbol;Acc:HGNC:31700]	ZBTB
ENSG00000184160	0.728002	0.948465	1.01601	1.49286	0.866729	1.03502	0.99809	0.777713	0.941616	ADRA2C	4	3766348	3768526	+	2179	protein_coding	adrenoceptor alpha 2C [Source:HGNC Symbol;Acc:HGNC:283]	-
ENSG00000207581	0	0	0	0	0	0	0	0	0	MIR199B	9	128244721	128244830	-	110	miRNA	microRNA 199b [Source:HGNC Symbol;Acc:HGNC:31573]	-
ENSG00000156873	7.4317	6.84091	6.52527	8.80513	8.58215	8.33818	6.12841	7.11788	6.91141	PHKG2	16	30748270	30761176	+	7509	protein_coding	phosphorylase kinase catalytic subunit gamma 2 [Source:HGNC Symbol;Acc:HGNC:8931]	-
ENSG00000273682	0	0.78356	0	0.449642	0	0	0	0	0	AC109583.2	3	46918807	46918935	-	129	processed_pseudogene	biliverdin reductase B (flavin reductase (NADPH) (BLVRB) pseudogene	-
ENSG00000259370	0.1162	0.0224921	0.234245	0.0258139	0.0653983	0.0419056	0.318619	0.200327	0.369059	AC103740.1	15	62827675	62884034	-	8535	antisense	uncharacterized LOC105370854 [Source:NCBI gene;Acc:105370854]	-
ENSG00000277738	0	0	0	0	0	0	0	0	0	AC126175.1	12	91634887	91635644	+	758	lincRNA	novel transcript	-
ENSG00000086730	1.14293	0.953578	0.635592	1.44462	0.850276	0.959385	0.54033	0.943679	0.773132	LAT2	7	74199652	74229834	+	4545	protein_coding	linker for activation of T cells family member 2 [Source:HGNC Symbol;Acc:HGNC:12749]	-
ENSG00000228137	0.937284	0.129589	0	0.148728	0.125598	0.241441	0	0.128244	0.250159	AP001469.2	21	46246890	46247682	+	390	antisense	novel transcript	-
ENSG00000132749	0.796294	0.567861	0.506917	0.279312	0.707624	0.86907	0.19153	0.682388	0.587251	TESMIN	11	68707440	68751564	-	5833	protein_coding	testis expressed metallothionein like protein [Source:HGNC Symbol;Acc:HGNC:7446]	-
ENSG00000263731	0.253118	0.301504	0.235503	0.670439	0.328747	0.351088	0.124573	0.242429	0.0545648	AC145207.5	17	81878425	81881106	-	2682	lincRNA	novel transcript	-
ENSG00000139163	26.3288	23.6822	26.3175	23.9607	22.9016	23.7377	23.6897	22.4151	25.5142	ETNK1	12	22625075	22690665	+	8191	protein_coding	ethanolamine kinase 1 [Source:HGNC Symbol;Acc:HGNC:24649]	-
ENSG00000154133	0.0615078	0.0297642	0.154991	0.1708	0.115391	0.221818	0.252982	0.176731	0.0287285	ROBO4	11	124883691	124898500	-	7033	protein_coding	roundabout guidance receptor 4 [Source:HGNC Symbol;Acc:HGNC:17985]	-
ENSG00000278657	0	0	0	0	0	0	0	0	0	AC245452.5	22	22036344	22040065	+	780	lincRNA	novel transcript	-
ENSG00000276096	0.176419	0.341484	0.533462	0	0	0.795286	0.322494	0.16897	0.1648	RF00017	16	4756338	4756633	+	296	misc_RNA		-
ENSG00000274959	0	0	0	0	0	0	0.059811	0.125351	0	SPDYE13P	7	75281267	75287118	+	798	unprocessed_pseudogene	speedy/RINGO cell cycle regulator family member E13, pseudogene [Source:HGNC Symbol;Acc:HGNC:51509]	-
ENSG00000249740	0.543959	0.263227	0.685351	0.906309	1.02049	0.429123	0.621474	0.846608	0.762202	OSMR-AS1	5	38710367	38845829	-	2119	lincRNA	OSMR antisense RNA 1 (head to head) [Source:HGNC Symbol;Acc:HGNC:50296]	-
ENSG00000211451	0.307953	0.255466	0.532114	0.342061	0.371398	0.237983	0.402099	0.67417	0.493152	GNRHR2	1	145919013	145925341	+	2511	transcribed_unitary_pseudogene	gonadotropin releasing hormone receptor 2 (pseudogene) [Source:HGNC Symbol;Acc:HGNC:16341]	-
ENSG00000229327	0	0	0	0	0	0	0	0	0	AL391839.1	10	32347397	32374488	+	265	antisense	uncharacterized LOC102031319 [Source:NCBI gene;Acc:102031319]	-
ENSG00000172724	0	0	0	0	0.0929474	0	0	0	0	CCL19	9	34689567	34691277	-	777	protein_coding	C-C motif chemokine ligand 19 [Source:HGNC Symbol;Acc:HGNC:10617]	-
ENSG00000278255	0	0	0	0	0	0	0	0	0	AC005344.1	12	2217462	2217920	-	459	antisense	novel transcript, antisense to CACNA1C	-
ENSG00000281202	0	0	0	0	0	0	0	0	0	LINC01097	4	13526319	13534335	-	2226	lincRNA	long intergenic non-protein coding RNA 1097 [Source:HGNC Symbol;Acc:HGNC:27738]	-
ENSG00000267575	4.53255	4.63383	3.86075	5.46001	5.20971	4.83472	3.09248	2.75144	3.27989	AC006504.5	19	27793463	27918863	+	5141	lincRNA	uncharacterized LOC101927151 [Source:NCBI gene;Acc:101927151]	-
ENSG00000010319	0.049241	0.0476564	0.0744483	0.0273474	0	0	0.0225031	0	0	SEMA3G	3	52433053	52445085	-	5011	protein_coding	semaphorin 3G [Source:HGNC Symbol;Acc:HGNC:30400]	-
ENSG00000198569	0.097471	0.117918	0.0982453	0.2436	0.114287	0.197727	0.178177	0.0700163	0.204866	SLC34A3	9	137230757	137236554	+	2303	protein_coding	solute carrier family 34 member 3 [Source:HGNC Symbol;Acc:HGNC:20305]	-
ENSG00000197965	169.285	162.04	165.498	150.435	148.079	151.664	172.806	152.78	164.563	MPZL1	1	167721192	167791919	+	7069	protein_coding	myelin protein zero like 1 [Source:HGNC Symbol;Acc:HGNC:7226]	-
ENSG00000207800	0	0	0	0	0	0	0	0	0	MIR504	X	138667711	138667793	-	83	miRNA	microRNA 504 [Source:HGNC Symbol;Acc:HGNC:32139]	-
ENSG00000222852	0	0	0	0	0	0	0	0	0	RF00019	5	180909838	180909927	+	90	misc_RNA		-
ENSG00000280250	0	0	0	0	0	0	0	0	0	AC097372.4	4	146231892	146232267	+	376	TEC	TEC	-
ENSG00000231808	0	0	0	0	0	0	0	0	0	LINC01388	9	112713	113754	-	416	lincRNA	long intergenic non-protein coding RNA 1388 [Source:HGNC Symbol;Acc:HGNC:50660]	-
ENSG00000168000	1.40805	1.95523	1.66605	1.69999	2.12472	1.54545	0.951226	1.99356	2.23031	BSCL2	11	62690275	62709845	-	3965	protein_coding	BSCL2, seipin lipid droplet biogenesis associated [Source:HGNC Symbol;Acc:HGNC:15832]	-
ENSG00000241846	0	0	0	0	0	0	0	0	0	AC092451.1	12	25409293	25409445	-	153	processed_pseudogene	ribosomal protein L39 (RPL39) pseudogene	-
ENSG00000213096	1.42149	1.91076	2.10938	1.44735	1.77784	1.4418	1.91278	1.38038	1.67829	ZNF254	19	24033405	24129961	+	7602	protein_coding	zinc finger protein 254 [Source:HGNC Symbol;Acc:HGNC:13047]	zf-C2H2
ENSG00000248161	1.11472	0.580915	0.950713	1.42866	1.36735	0.463852	1.09722	0.821264	0.961201	AC098487.1	4	102418602	102450010	-	992	lincRNA	novel transcript	-
ENSG00000088247	162.019	158.432	178.45	207.04	206.232	202.391	155.048	166.448	155.52	KHSRP	19	6413348	6424794	-	4563	protein_coding	KH-type splicing regulatory protein [Source:HGNC Symbol;Acc:HGNC:6316]	-
ENSG00000273512	0	0	0	0	0	0	0	0	0	AC022748.3	15	78749833	78750107	-	275	unprocessed_pseudogene	dynamin 1 (DNM1) pseudogene	-
ENSG00000260781	0.663815	0.942265	0.7583	1.96623	0.788714	1.31667	0.52583	0.890097	0.454738	ARHGAP23P1	16	33907419	33937167	-	2080	transcribed_unprocessed_pseudogene	Rho GTPase activating protein 23 pseudogene 1 [Source:HGNC Symbol;Acc:HGNC:45039]	-
ENSG00000169193	4.9649	5.57738	5.5852	5.95794	6.1541	6.79436	6.72584	6.41109	6.29432	CCDC126	7	23597379	23644708	+	3550	protein_coding	coiled-coil domain containing 126 [Source:HGNC Symbol;Acc:HGNC:22398]	-
ENSG00000183153	1.23912	0.74239	0.892117	1.31082	1.38371	1.75556	1.02469	0.96074	1.59847	GJD3	17	40362931	40363815	-	885	protein_coding	gap junction protein delta 3 [Source:HGNC Symbol;Acc:HGNC:19147]	-
ENSG00000198553	0.0663113	0.0641773	0	0.0736556	0.0311005	0	0.0606085	0.0317556	0	KCNRG	13	50015254	50020922	+	1625	protein_coding	potassium channel regulator [Source:HGNC Symbol;Acc:HGNC:18893]	-
ENSG00000230491	0	0	0	0	0	0	0	0	0.399844	AC234781.4	X	155310247	155310490	+	244	processed_pseudogene	pseudogene similar to part of steroid-5-alpha-reductase, alpha polypeptide 2 (3-oxo-5 alpha-steroid delta 4-dehydrogenase alpha 2) (SRD5A2)	-
ENSG00000282390	0	0	0	0	0	0	0	0	0	AL392083.1	10	1290018	1293002	-	2985	sense_intronic	novel transcript, sense intronic to ADARB2	-
ENSG00000255462	0	0	0	0	0	0	0	0	0	AC104031.1	11	11570084	11573782	+	372	antisense	novel transcript	-
ENSG00000229690	0	0	0	0	0	0	0	0	0	MTCO2P1	20	60414396	60414872	-	477	processed_pseudogene	MT-CO2 pseudogene 1 [Source:HGNC Symbol;Acc:HGNC:16564]	-
ENSG00000170290	0	0	0	0	0	0	0	0	0	SLN	11	107707378	107719693	-	906	protein_coding	sarcolipin [Source:HGNC Symbol;Acc:HGNC:11089]	-
ENSG00000228734	0	0	0	0	0	0	0	0	0	AC096543.2	1	63249920	63251771	+	859	lincRNA	novel transcript	-
ENSG00000159387	0	0	0	0	0	0	0	0	0	IRX6	16	55323760	55330760	+	3399	protein_coding	iroquois homeobox 6 [Source:HGNC Symbol;Acc:HGNC:14675]	Homeobox
ENSG00000223820	0.488038	0.767541	0.491915	0.271046	0.343341	0.385008	0.780617	0.46743	0.797819	CFL1P1	10	87817928	87845612	+	2695	transcribed_unprocessed_pseudogene	cofilin 1 pseudogene 1 [Source:HGNC Symbol;Acc:HGNC:28560]	-
ENSG00000144218	4.94422	4.26713	5.85689	5.03888	4.08792	4.13595	3.65714	3.95433	4.40433	AFF3	2	99545419	100142739	-	12737	protein_coding	AF4/FMR2 family member 3 [Source:HGNC Symbol;Acc:HGNC:6473]	AF-4
ENSG00000124422	130.414	123.438	133.62	144.971	146.373	137.083	128.163	122.844	120.963	USP22	17	20999593	21043760	-	6808	protein_coding	ubiquitin specific peptidase 22 [Source:HGNC Symbol;Acc:HGNC:12621]	-
ENSG00000200174	0	0	0	0	0	0	0	0	0	RF00019	1	62211557	62211666	+	110	misc_RNA		-
ENSG00000211973	0	0	0	0	0	0	0	0	0	IGHV1-69	14	106714684	106715181	-	412	IG_V_gene	immunoglobulin heavy variable 1-69 [Source:HGNC Symbol;Acc:HGNC:5558]	-
ENSG00000254658	0	0	0	0	0	0	0	0	0	OR8J2	11	56208985	56215222	-	2883	polymorphic_pseudogene	olfactory receptor family 8 subfamily J member 2 (gene/pseudogene) [Source:HGNC Symbol;Acc:HGNC:15311]	-
ENSG00000267567	0.303605	0	0	0	0	0	0.184997	0	0.0945367	AC008736.2	19	32718298	32719595	-	516	lincRNA	novel transcript	-
ENSG00000201009	0	0	0	0	0	0	0	0	0	RF00218	7	132753023	132753126	+	104	snoRNA		-
ENSG00000229982	0	0	0	0	0	0	0	0	0	GTF3AP6	7	118880103	118881288	-	986	processed_pseudogene	general transcription factor IIIA pseudogene 6 [Source:HGNC Symbol;Acc:HGNC:49749]	-
ENSG00000218521	0	0	0	0	0	0	0	0	0	AL589655.1	6	38002832	38003313	-	482	processed_pseudogene	pseudogene similar to an integrin Alpha-E precursor fragment	-
ENSG00000258767	0	0	0	0	0	0	0	0	0	AC060814.2	15	21382383	21382842	+	460	processed_pseudogene	GRAM domain containing 4 (GRAMD4) pseudogene	-
ENSG00000233871	0.350471	0.37688	0.392505	0.519049	0.328747	0.140435	0.213553	0.410265	0.436519	DLG5-AS1	10	77927372	77929824	+	2445	processed_transcript	DLG5 antisense RNA 1 [Source:HGNC Symbol;Acc:HGNC:45109]	-
ENSG00000265806	5.45583	3.77162	3.14238	6.06009	3.65547	2.8108	2.13713	8.21142	0	MIR4292	9	136830957	136831023	+	67	miRNA	microRNA 4292 [Source:HGNC Symbol;Acc:HGNC:38348]	-
ENSG00000234376	0	0	0	0	0	0	0	0	0	UBTFL2	11	89752785	89753975	-	1191	processed_pseudogene	UBTF like 2 (pseudogene) [Source:HGNC Symbol;Acc:HGNC:35169]	-
ENSG00000174792	0.311452	0.401906	1.20338	0.230631	0.43822	0.280801	0.806557	0.497167	0.4849	ODAPH	4	75556048	75565885	+	2054	protein_coding	odontogenesis associated phosphoprotein [Source:HGNC Symbol;Acc:HGNC:26300]	-
ENSG00000203805	20.9846	22.2312	23.1529	26.7068	27.336	25.8873	22.3194	23.9023	21.2069	PLPP4	10	120456954	120589855	+	1785	protein_coding	phospholipid phosphatase 4 [Source:HGNC Symbol;Acc:HGNC:23531]	-
ENSG00000273710	0	0	0	0	0	0	0	0	0	RF00017	8	28915579	28915864	-	286	misc_RNA		-
ENSG00000134962	0	0	0.0173084	0	0.0402691	0.0154821	0.0235428	0.0246703	0	KLB	4	39406853	39451536	+	6082	protein_coding	klotho beta [Source:HGNC Symbol;Acc:HGNC:15527]	-
ENSG00000232258	0	0	0	0	0	0	0	0	0	TMEM114	16	8537605	8590193	-	1419	protein_coding	transmembrane protein 114 [Source:HGNC Symbol;Acc:HGNC:33227]	-
ENSG00000270453	0	0	0	0	0	0	0	0	0	AC007566.2	7	92442077	92442489	+	413	processed_pseudogene	coiled-coil-helix-coiled-coil-helix domain containing 4, pseudogene	-
ENSG00000277631	0.0844986	0	0	0	0	0	0.0772317	0.0809304	0	PGM5P3-AS1	9	72674	88826	+	2003	lincRNA	PGM5P3 antisense RNA 1 [Source:HGNC Symbol;Acc:HGNC:51194]	-
ENSG00000122728	0	0	0.025403	0	0	0	0	0.00804617	0.00784764	TAF1L	9	32629454	32635669	-	6216	protein_coding	TATA-box binding protein associated factor 1 like [Source:HGNC Symbol;Acc:HGNC:18056]	-
ENSG00000251075	0	0.0981352	0	0	0	0	0	0	0	HTT-AS	4	3063471	3074514	-	515	antisense	HTT antisense RNA [Source:HGNC Symbol;Acc:HGNC:37118]	-
ENSG00000272139	0	0	0	0	0	0	0	0	0	AC113349.2	5	122311297	122311673	-	377	antisense	novel transcript, antisense to SNCAIP	-
ENSG00000254663	0	0	0	0	0	0	0	0	0	OR4A11P	11	55318560	55319465	+	906	unprocessed_pseudogene	olfactory receptor family 4 subfamily A member 11 pseudogene [Source:HGNC Symbol;Acc:HGNC:15148]	-
ENSG00000279222	0	0	0	0	0	0	0	0	0	AC025183.3	5	1858409	1859890	-	1482	TEC	tec	-
ENSG00000156521	2.85918	2.98481	2.47713	3.90736	3.64625	3.82325	3.18586	3.16921	3.01599	TYSND1	10	70137981	70146676	-	4597	protein_coding	trypsin domain containing 1 [Source:HGNC Symbol;Acc:HGNC:28531]	-
ENSG00000228221	0	0	0	0	0	0	0	0	0	LINC00578	3	177441921	177752305	+	1234	lincRNA	long intergenic non-protein coding RNA 578 [Source:HGNC Symbol;Acc:HGNC:43807]	-
ENSG00000006530	10.2924	9.67901	12.4608	14.8329	14.1124	15.6148	10.2867	11.5333	10.2955	AGK	7	141551189	141655244	+	10786	protein_coding	acylglycerol kinase [Source:HGNC Symbol;Acc:HGNC:21869]	-
ENSG00000259319	0.605386	0.672705	0.474596	0.34867	0.294447	0.464947	0.307401	0.343598	0.397955	AF111167.2	14	75423683	75427741	-	4059	antisense	uncharacterized LOC101928377 [Source:NCBI gene;Acc:101928377]	-
ENSG00000212176	0	0	0	0	0	0	0	0	0	RNA5SP207	6	41239520	41239626	-	107	rRNA_pseudogene	RNA, 5S ribosomal pseudogene 207 [Source:HGNC Symbol;Acc:HGNC:43107]	-
ENSG00000196260	0	0	0	0	0	0	0	0	0	SFTA2	6	30931353	30955636	-	1204	protein_coding	surfactant associated 2 [Source:HGNC Symbol;Acc:HGNC:18386]	-
ENSG00000266385	0.0946017	0	0	0	0	0	0	0	0	AC005899.5	17	32411217	32412420	+	552	lincRNA	novel transcript	-
ENSG00000216676	0	0	0	0	0	0	0	0	0	AL031229.1	6	27652602	27652825	-	224	processed_pseudogene	60S ribosomal protein L8 (RPL8) pseudogene	-
ENSG00000235463	0	0	0	0	0	0	0	0	0	AC078974.1	2	85068809	85069031	-	223	processed_pseudogene	Cytochrome c oxidase subunit 1 (COX1) pseudogene	-
ENSG00000237181	0.571492	0.553101	0.648036	0.55544	1.20616	1.09491	0.587637	0.88946	0.800782	AC147651.3	7	603185	608482	+	731	antisense	novel transcript	-
ENSG00000258892	0	0	0	0	0	0	0	0	0	AL160236.2	14	60879714	60982585	+	200	processed_transcript	novel transcript	-
ENSG00000147894	1.41195	1.70814	1.37869	2.59755	2.37984	2.34709	1.02839	1.47911	1.93722	C9orf72	9	27546545	27573866	-	6332	protein_coding	chromosome 9 open reading frame 72 [Source:HGNC Symbol;Acc:HGNC:28337]	-
ENSG00000244582	0	0	0.10485	0	0	0	0	0	0	RPL21P120	17	21504558	21505059	+	502	processed_pseudogene	ribosomal protein L21 pseudogene 120 [Source:HGNC Symbol;Acc:HGNC:35743]	-
ENSG00000207629	0	0	0	0	0	0	0	0	0	MIR526A1	19	53706252	53706336	+	85	miRNA	microRNA 526a-1 [Source:HGNC Symbol;Acc:HGNC:32107]	-
ENSG00000212230	0	0	0	0	0	0	0	0	0	RNU6-747P	1	243081156	243081259	-	104	snRNA	RNA, U6 small nuclear 747, pseudogene [Source:HGNC Symbol;Acc:HGNC:47710]	-
ENSG00000100814	21.8457	23.0252	21.4159	15.4566	15.4856	14.0748	22.383	23.1684	23.3888	CCNB1IP1	14	20311368	20333312	-	3680	protein_coding	cyclin B1 interacting protein 1 [Source:HGNC Symbol;Acc:HGNC:19437]	-
ENSG00000167110	85.8223	91.8689	95.6079	97.4033	100.401	97.1259	90.0813	89.2249	91.6784	GOLGA2	9	128255829	128275995	-	6961	protein_coding	golgin A2 [Source:HGNC Symbol;Acc:HGNC:4425]	-
ENSG00000158485	0	0	0	0	0	0	0	0	0	CD1B	1	158327951	158331531	-	1395	protein_coding	CD1b molecule [Source:HGNC Symbol;Acc:HGNC:1635]	-
ENSG00000140795	0	0.0772777	0	0.0886908	0.049932	0.0239964	0.0729804	0.0764755	0.0497257	MYLK3	16	46703369	46790407	-	9522	protein_coding	myosin light chain kinase 3 [Source:HGNC Symbol;Acc:HGNC:29826]	-
ENSG00000236886	0	0	0	0	0	0	0	0	0	AC007563.2	2	216694464	216994079	+	904	antisense	novel transcript, antisense to IGFBP5 and TNP1	-
ENSG00000222503	0	0	0	0	0	0.435935	0	0	0	RF00019	10	103673158	103673265	+	108	misc_RNA		-
ENSG00000270449	0	0	0	0	0	0	0	0	0	AP001485.1	11	104682383	104682581	-	199	processed_pseudogene	nucleophosmin (nucleolar phosphoprotein B23, numatrin), pseudogene	-
ENSG00000124222	31.1816	27.7779	30.6148	30.859	28.151	29.3439	29.315	29.1176	28.0608	STX16	20	58651253	58679526	+	5099	protein_coding	syntaxin 16 [Source:HGNC Symbol;Acc:HGNC:11431]	-
ENSG00000223519	0.256768	0.0931893	0.129404	0.0356507	0.210746	0.0578745	0.117343	0.122962	0.0599643	KIF28P	1	246771837	246839611	-	3525	transcribed_unitary_pseudogene	kinesin family member 28, pseudogene [Source:HGNC Symbol;Acc:HGNC:49205]	-
ENSG00000233673	0.133351	0	0	0.14812	0.050034	0.0480909	0.048753	0.12772	0.0249137	ANAPC1P1	2	86861825	86912978	+	2553	transcribed_unprocessed_pseudogene	anaphase promoting complex subunit 1 pseudogene 1 [Source:HGNC Symbol;Acc:HGNC:44150]	-
ENSG00000274967	0	0	0	0	0	0	0	0	0	RF00019	3	53290640	53290751	+	112	misc_RNA		-
ENSG00000253936	0	0	0	0	0	0	0	0	0	IGHV3-63	14	106652237	106652681	-	341	IG_V_pseudogene	immunoglobulin heavy variable 3-63 (pseudogene) [Source:HGNC Symbol;Acc:HGNC:5616]	-
ENSG00000158258	0.0503084	0.0791203	0.012677	0.0349252	0.0176963	0.00566967	0.149441	0.036138	0.105739	CLSTN2	3	139935185	140577397	+	14596	protein_coding	calsyntenin 2 [Source:HGNC Symbol;Acc:HGNC:17448]	-
ENSG00000234780	0	0	0	0	0	0	0	0	0	AC245047.5	X	48197221	48199431	+	556	processed_pseudogene	ornithine aminotransferase (gyrate atrophy)(OAT) pseudogene	-
ENSG00000224961	0.357672	0	0	0.264857	0.111834	0.214981	0	0	0	LINC01752	20	10753090	10753966	+	438	lincRNA	long intergenic non-protein coding RNA 1752 [Source:HGNC Symbol;Acc:HGNC:52540]	-
ENSG00000180785	0	0	0	0	0	0	0	0	0	OR51E1	11	4643420	4655488	+	3612	protein_coding	olfactory receptor family 51 subfamily E member 1 [Source:HGNC Symbol;Acc:HGNC:15194]	-
ENSG00000182774	5.92065	6.76154	8.2354	14.3365	8.21942	11.8503	5.19501	6.12428	6.52625	RPS17	15	82536750	82540564	-	3293	protein_coding	ribosomal protein S17 [Source:HGNC Symbol;Acc:HGNC:10397]	-
ENSG00000188092	6.74218	2.21611	2.27593	2.68471	2.32686	7.42629	2.58703	3.01552	4.57507	GPR89B	1	147928393	147993521	+	5143	protein_coding	G protein-coupled receptor 89B [Source:HGNC Symbol;Acc:HGNC:13840]	-
ENSG00000213658	0.0998472	0.144951	0.150961	0	0.187317	0.0450105	0	0	0.0466357	LAT	16	28984826	28990783	+	4430	protein_coding	linker for activation of T cells [Source:HGNC Symbol;Acc:HGNC:18874]	-
ENSG00000185252	1.98644	2.47675	2.12849	3.02144	2.80336	2.8397	2.07732	1.73116	2.15653	ZNF74	22	20394115	20408461	+	6251	protein_coding	zinc finger protein 74 [Source:HGNC Symbol;Acc:HGNC:13144]	zf-C2H2
ENSG00000272056	0	0.153383	0	0.0880179	0	0.071443	0	0.151791	0.0740227	AC013472.3	2	27053618	27054276	-	659	antisense	novel transcript, antisense to AGBL5	-
ENSG00000256940	1.27056	3.19716	1.53679	7.90319	3.6946	3.89477	2.67098	2.92058	2.0177	AP001453.2	11	64245964	64248217	+	597	antisense	uncharacterized LOC105369340 [Source:NCBI gene;Acc:105369340]	-
ENSG00000257165	0	0	0	0	0	0	0	0	0	AC079362.1	12	78448995	78540675	-	718	lincRNA	novel transcript	-
ENSG00000234465	0.107338	0.0519421	0.649146	0.0596133	0.20137	0.532261	0.441483	0.462626	0.200538	PINLYP	19	43576800	43583964	+	3570	protein_coding	phospholipase A2 inhibitor and LY6/PLAUR domain containing [Source:HGNC Symbol;Acc:HGNC:44206]	-
ENSG00000240881	0	0	0	0	0	0	0	0	0	AC068472.1	11	23520322	23521202	+	881	processed_pseudogene	ribosomal protein S2 (RPS2) pseudogene	-
ENSG00000198948	10.1365	8.44352	10.47	7.63391	9.50818	7.3281	9.40816	9.1073	10.1725	MFAP3L	4	169986597	170033031	-	8741	protein_coding	microfibril associated protein 3 like [Source:HGNC Symbol;Acc:HGNC:29083]	-
ENSG00000229720	0.391371	0.432888	0.507189	0	0	0.100816	0.511019	0.69614	1.25347	AL109924.2	6	169034197	169035642	-	934	lincRNA	uncharacterized LOC101929460 [Source:NCBI gene;Acc:101929460]	-
ENSG00000047662	0.0473151	0.0228962	0.0397425	0.0262778	0.0369853	0.0213293	0.021623	0	0.044199	FAM184B	4	17629306	17781512	-	6622	protein_coding	family with sequence similarity 184 member B [Source:HGNC Symbol;Acc:HGNC:29235]	-
ENSG00000235962	0	0	0	0	0	0	0	0	0	RPL7AP53	10	33057615	33058407	-	793	processed_pseudogene	ribosomal protein L7a pseudogene 53 [Source:HGNC Symbol;Acc:HGNC:36392]	-
ENSG00000228930	0	0	0	0	0	0	0	0	0	MTCO1P3	21	45376191	45376382	-	192	processed_pseudogene	MT-CO1 pseudogene 3 [Source:HGNC Symbol;Acc:HGNC:39604]	-
ENSG00000165061	0	0	0	0	0	0	0	0	0.0499805	ZMAT4	8	40530590	40897833	-	3691	protein_coding	zinc finger matrin-type 4 [Source:HGNC Symbol;Acc:HGNC:25844]	-
ENSG00000270858	0	0	0	0	0	0	0	0	0	VDAC1P5	12	54802746	54803589	-	844	processed_pseudogene	voltage dependent anion channel 1 pseudogene 5 [Source:HGNC Symbol;Acc:HGNC:12676]	-
ENSG00000169515	1.61786	2.20142	1.6953	1.38782	1.42743	1.40087	2.02044	1.74899	2.3343	CCDC8	19	46410329	46413662	-	3334	protein_coding	coiled-coil domain containing 8 [Source:HGNC Symbol;Acc:HGNC:25367]	-
ENSG00000222874	0	0	0	0	0	0	0	0	0	RN7SKP33	20	46859333	46859672	+	340	misc_RNA	RNA, 7SK small nuclear pseudogene 33 [Source:HGNC Symbol;Acc:HGNC:45757]	-
ENSG00000103310	0	0	0	0	0	0	0	0	0	ZP2	16	21197450	21214510	-	3453	protein_coding	zona pellucida glycoprotein 2 [Source:HGNC Symbol;Acc:HGNC:13188]	-
ENSG00000127329	1.44599	1.71752	1.05999	0.851744	0.863142	0.740732	1.18146	1.10165	1.06424	PTPRB	12	70515866	70637440	-	14542	protein_coding	protein tyrosine phosphatase, receptor type B [Source:HGNC Symbol;Acc:HGNC:9665]	-
ENSG00000221603	0	0	0	0	0	0	0	0	0	MIR1184-3	X	155457517	155457615	+	99	miRNA	microRNA 1184-3 [Source:HGNC Symbol;Acc:HGNC:38389]	-
ENSG00000163518	0	0	0	0	0	0	0	0	0	FCRL4	1	157573749	157598080	-	3875	protein_coding	Fc receptor like 4 [Source:HGNC Symbol;Acc:HGNC:18507]	-
ENSG00000258343	0	0	0.119625	0	0	0	0	0.11367	0	AC090001.1	12	95795345	95858839	-	924	antisense	uncharacterized LOC105369921 [Source:NCBI gene;Acc:105369921]	-
ENSG00000284139	0	0	0	0	0	0	0	0	0	MIR1234	8	144400086	144400165	-	80	miRNA	microRNA 1234 [Source:HGNC Symbol;Acc:HGNC:33926]	-
ENSG00000239304	0	0	0	0	0	0	0	0	0	DNM1P48	Y	25486640	25487322	+	439	processed_pseudogene	dynamin 1 pseudogene 48 [Source:HGNC Symbol;Acc:HGNC:38801]	-
ENSG00000255041	0	0	0	0	0	0	0	0	0	AC103855.3	11	45387215	45513802	-	606	lincRNA	novel transcript	-
ENSG00000269961	0	0	0	0.228812	0.579684	0.650033	0.0941404	0.394596	0.38486	AC010359.1	5	65924629	65925135	-	507	lincRNA	novel transcript	-
ENSG00000171401	0	0	0.0470375	0	0	0	0	0.0893923	0	KRT13	17	41500981	41505705	-	2913	protein_coding	keratin 13 [Source:HGNC Symbol;Acc:HGNC:6415]	-
ENSG00000278265	0	0	0	0	0	0	0	0	0	MIR6770-1	16	14930820	14930879	+	60	miRNA	microRNA 6770-1 [Source:HGNC Symbol;Acc:HGNC:50223]	-
ENSG00000175701	7.53583	8.06374	8.23758	11.8483	12.0467	9.61714	7.08177	9.40323	8.52675	MTLN	2	110211529	110245420	-	2051	protein_coding	mitoregulin [Source:HGNC Symbol;Acc:HGNC:27339]	-
ENSG00000153230	0	0	0	0	0	0	0	0	0	OR14K1	1	247738615	247739559	+	945	protein_coding	olfactory receptor family 14 subfamily K member 1 [Source:HGNC Symbol;Acc:HGNC:15025]	-
ENSG00000060303	0	0	0	0	0	0	0	0	0	RPS17P5	6	50857255	50857662	-	408	processed_pseudogene	ribosomal protein S17 pseudogene 5 [Source:HGNC Symbol;Acc:HGNC:21352]	-
ENSG00000255606	0.0898797	0.0869873	0	0.199669	0.0843086	0	0.0821501	0.0860843	0	AP000439.1	11	69438365	69444743	-	581	lincRNA	novel transcript	-
ENSG00000227193	0	0	0	0	0.198313	0.190611	0	0.20249	0	AC244453.1	1	121118126	121146826	+	494	lincRNA	novel transcript	-
ENSG00000207697	1.58243	0	0.531666	0.585897	0.494781	0	0	1.0104	0	MIR573	4	24520192	24520290	-	99	miRNA	microRNA 573 [Source:HGNC Symbol;Acc:HGNC:32829]	-
ENSG00000232228	0	0	0	0	0	0	0	0	0	AC092431.2	2	69594741	69595058	-	318	processed_pseudogene	ribosomal protein L36a (RPL36A) pseudogene	-
ENSG00000067445	17.431	18.8071	16.0289	15.3195	12.8005	14.3704	17.6282	16.904	17.8807	TRO	X	54920462	54931431	+	6716	protein_coding	trophinin [Source:HGNC Symbol;Acc:HGNC:12326]	-
ENSG00000266458	0	0	0	0	0	0	0	0	0	MIR4259	1	159899979	159900079	-	101	miRNA	microRNA 4259 [Source:HGNC Symbol;Acc:HGNC:38309]	-
ENSG00000237407	0	0	0	0	0	0	0	0	0	AP000552.3	22	21312920	21314904	+	775	lincRNA	novel transcript	-
ENSG00000266038	0	0	0	0	0	0	0	0	0	MIR4659A	8	6745164	6745244	+	81	miRNA	microRNA 4659a [Source:HGNC Symbol;Acc:HGNC:41857]	-
ENSG00000225214	0	0	0	0	0	0	0	0	0	AC079790.1	2	152098328	152109202	+	507	antisense	novel transcript (LOC100127920)	-
ENSG00000265489	0.0141941	0	0	0	0	0	0	0.0135947	0	AC005358.2	17	12760140	12790242	-	3679	antisense	uncharacterized LOC100128006 [Source:NCBI gene;Acc:100128006]	-
ENSG00000200726	0	0	0	0	0	0	0	0	0	SNORD115-8	15	25184306	25184387	+	82	snoRNA	small nucleolar RNA, C/D box 115-8 [Source:HGNC Symbol;Acc:HGNC:33027]	-
ENSG00000265284	0	0	0	0	0	0	0	0	0	MIR4770	X	6383906	6383963	-	58	miRNA	microRNA 4770 [Source:HGNC Symbol;Acc:HGNC:41542]	-
ENSG00000202142	0	0	0	0	0	0	0	0	0	SNORD114-18	14	100975825	100975896	+	72	snoRNA	small nucleolar RNA, C/D box 114-18 [Source:HGNC Symbol;Acc:HGNC:33006]	-
ENSG00000215498	0	0	0	0	0	0	0	0	0	FAM230B	22	21167758	21192156	+	6393	processed_transcript	family with sequence similarity 230 member B [Source:HGNC Symbol;Acc:HGNC:32943]	-
ENSG00000269935	0	0	0	0	0	0	0	0	0	AC092720.2	16	87600526	87602190	-	1665	antisense	novel transcript, antisense to JPH3	-
ENSG00000259301	0	0	0	0	0	0	0	0	0	AC084759.1	15	53837271	53837560	-	290	processed_pseudogene	SMT3 suppressor of mif two 3 homolog 2 (S. cerevisiae) (SUMO2) pseudogene	-
ENSG00000275128	0	0	0	0	0	0	0	0	0	RN7SL203P	8	70480192	70480487	-	296	misc_RNA	RNA, 7SL, cytoplasmic 203, pseudogene [Source:HGNC Symbol;Acc:HGNC:46219]	-
ENSG00000211965	0	0	0	0	0	0	0	0	0	IGHV3-49	14	106556936	106557477	-	439	IG_V_gene	immunoglobulin heavy variable 3-49 [Source:HGNC Symbol;Acc:HGNC:5607]	-
ENSG00000125910	0	0	0.0532203	0	0	0	0.14478	0	0	S1PR4	19	3172346	3180332	+	1664	protein_coding	sphingosine-1-phosphate receptor 4 [Source:HGNC Symbol;Acc:HGNC:3170]	-
ENSG00000115602	0	0	0	0	0	0	0.026196	0	0	IL1RL1	2	102311502	102352037	+	5746	protein_coding	interleukin 1 receptor like 1 [Source:HGNC Symbol;Acc:HGNC:5998]	-
ENSG00000110987	3.2466	3.04832	3.28867	4.18029	3.72715	3.59697	2.9231	3.46531	2.95734	BCL7A	12	122019422	122062044	+	6565	protein_coding	BCL tumor suppressor 7A [Source:HGNC Symbol;Acc:HGNC:1004]	-
ENSG00000008118	0.714454	0.597172	1.04746	1.40681	0.670169	0.761259	0.534282	0.528765	0.273028	CAMK1G	1	209583717	209613938	+	2676	protein_coding	calcium/calmodulin dependent protein kinase IG [Source:HGNC Symbol;Acc:HGNC:14585]	-
ENSG00000241899	0	0	0	0	0	0	0	0	0	TPT1P3	3	141709016	141709832	-	512	processed_pseudogene	tumor protein, translationally-controlled 1 pseudogene 3 [Source:HGNC Symbol;Acc:HGNC:49295]	-
ENSG00000207466	0	0	0	0	0	0	0	0	0	RF00019	1	38950825	38950925	-	101	misc_RNA		-
ENSG00000182747	0	0	0	0	0	0.039916	0	0	0	SLC35D3	6	136922264	136925639	+	2359	protein_coding	solute carrier family 35 member D3 [Source:HGNC Symbol;Acc:HGNC:15621]	-
ENSG00000236695	0	0	0	0	0	0	0	0	0	HNRNPA1P47	2	194187379	194188309	+	931	processed_pseudogene	heterogeneous nuclear ribonucleoprotein A1 pseudogene 47 [Source:HGNC Symbol;Acc:HGNC:48777]	-
ENSG00000254254	0.162578	0.0314693	0	0.216701	0.0610004	0.146578	0.0297193	0	0.182245	AC012349.1	8	56445807	56552067	+	3078	antisense	uncharacterized LOC101929415 [Source:NCBI gene;Acc:101929415]	-
ENSG00000227692	0	0	0	0.21847	0.184495	0	0.0898855	0.0941902	0.183732	MED28P3	2	186364598	186365128	+	531	processed_pseudogene	mediator complex subunit 28 pseudogene 3 [Source:HGNC Symbol;Acc:HGNC:45080]	-
ENSG00000214530	25.8496	20.1654	18.7701	14.6094	15.5745	15.4393	24.1622	22.4506	22.5049	STARD10	11	72754729	72793681	-	3710	protein_coding	StAR related lipid transfer domain containing 10 [Source:HGNC Symbol;Acc:HGNC:10666]	-
ENSG00000141527	0.585248	0.308954	0.321762	0.502325	0.374299	0.359763	0.510603	0.586014	0.0994008	CARD14	17	80169992	80209331	+	8366	protein_coding	caspase recruitment domain family member 14 [Source:HGNC Symbol;Acc:HGNC:16446]	-
ENSG00000230894	0	0	0	0	0	0	0	0	0	AL133284.1	9	116568449	116586328	+	4996	antisense	novel transcript	-
ENSG00000023697	17.2601	15.9599	13.7959	24.3005	24.9041	25.7211	14.57	16.1101	14.8397	DERA	12	15911172	16037282	+	2844	protein_coding	deoxyribose-phosphate aldolase [Source:HGNC Symbol;Acc:HGNC:24269]	-
ENSG00000182974	0	0	0	0	0	0	0	0	0	AC135068.1	15	21637909	21638992	+	1084	protein_coding	novel olfactory receptor protein similar to OR4M2	-
ENSG00000062282	0.976338	1.29589	1.06844	0.650683	0.549492	0.729352	0.790387	0.908392	1.06839	DGAT2	11	75759512	75801535	+	7905	protein_coding	diacylglycerol O-acyltransferase 2 [Source:HGNC Symbol;Acc:HGNC:16940]	-
ENSG00000218233	0	0	0	0	0	0.0343406	0	0	0	NEPNP	6	117633706	117645087	+	1371	unitary_pseudogene	nephrocan, pseudogene [Source:HGNC Symbol;Acc:HGNC:33184]	-
ENSG00000163607	7.40498	7.58095	7.63638	8.8432	8.19065	8.02692	8.17656	7.37926	7.99688	GTPBP8	3	112990918	113015060	+	3826	protein_coding	GTP binding protein 8 (putative) [Source:HGNC Symbol;Acc:HGNC:25007]	-
ENSG00000277426	0	0	0	0	0	0	0	0	0	AC006441.5	17	39023394	39026742	+	209	unprocessed_pseudogene	RAD52 motif 1 (RDM1) pseudogene	-
ENSG00000232503	0	0	0	0	0	0	0	0	0	CYCSP8	2	130776646	130776957	+	312	processed_pseudogene	cytochrome c, somatic pseudogene 8 [Source:HGNC Symbol;Acc:HGNC:24423]	-
ENSG00000116752	21.0311	20.3082	19.9484	21.5594	21.5616	23.218	20.3557	22.0614	20.4925	BCAS2	1	114567557	114581639	-	1299	protein_coding	BCAS2, pre-mRNA processing factor [Source:HGNC Symbol;Acc:HGNC:975]	-
ENSG00000227203	0	0.132303	0.275576	0.151842	0.384686	0	0	0.130929	0.255398	SUB1P1	8	11790005	11790386	+	382	processed_pseudogene	SUB1 homolog, transcriptional regulator pseudogene 1 [Source:HGNC Symbol;Acc:HGNC:32300]	-
ENSG00000248387	0	0	0	0	0	0	0	0	0	AC121161.1	4	158469586	158470702	+	652	processed_pseudogene	GC-rich promoter binding protein 1 (GPBP1) pseudogene	-
ENSG00000144645	33.1911	38.6396	40.3522	24.5916	27.6325	24.0519	38.7988	38.2035	40.6451	OSBPL10	3	31657890	32077580	-	11976	protein_coding	oxysterol binding protein like 10 [Source:HGNC Symbol;Acc:HGNC:16395]	-
ENSG00000227519	0	0	0	0	0	0	0	0	0	AL008719.1	22	31963357	31970400	+	473	lincRNA	novel transcript	-
ENSG00000274098	0	0	0	0	0	0	0	0	0	RN7SL787P	9	67791499	67791782	-	284	misc_RNA	RNA, 7SL, cytoplasmic 787, pseudogene [Source:HGNC Symbol;Acc:HGNC:46803]	-
ENSG00000277351	0	0	0	0	0	0	0	0	0	AC013553.3	15	65049188	65049802	-	615	antisense	novel transcript, antisense to SLC51B	-
ENSG00000264050	0	0	0	0	0	0	0	0	0	AC005412.1	17	29197071	29197785	-	715	processed_pseudogene	gap junction protein, alpha 4, 37kDa (GJA4) pseudogene	-
ENSG00000155962	0.621668	0.386783	0.447576	0.0493229	0.374872	0.0800696	0.284102	0.467827	0.248882	CLIC2	X	155276211	155334657	-	2840	protein_coding	chloride intracellular channel 2 [Source:HGNC Symbol;Acc:HGNC:2063]	-
ENSG00000254635	5.29401	6.12788	5.52816	6.25669	6.13781	6.26219	5.90324	6.22652	5.8553	WAC-AS1	10	28522652	28532743	-	2943	antisense	WAC antisense RNA 1 (head to head) [Source:HGNC Symbol;Acc:HGNC:27347]	-
ENSG00000231253	0	0	0	0	0	0	0	0	0	LINC01640	22	33108529	33116294	+	550	lincRNA	long intergenic non-protein coding RNA 1640 [Source:HGNC Symbol;Acc:HGNC:52427]	-
ENSG00000156689	0.551472	0.656892	0.427579	0.518311	0.915204	0.650184	0.387727	0.568814	0.27739	GLYATL2	11	58834065	58904215	-	1838	protein_coding	glycine-N-acyltransferase like 2 [Source:HGNC Symbol;Acc:HGNC:24178]	-
ENSG00000104723	160.998	167.745	167.947	206.066	198.028	203.772	171.016	174.394	174.344	TUSC3	8	15417215	15766649	+	5190	protein_coding	tumor suppressor candidate 3 [Source:HGNC Symbol;Acc:HGNC:30242]	-
ENSG00000212511	0	0	0	0	0	0	0	0	0	RF00012	15	36852640	36852859	+	220	snoRNA		-
ENSG00000200398	0	0	0	0	0	0	0	0	0	SNORD115-24	15	25213648	25213729	+	82	snoRNA	small nucleolar RNA, C/D box 115-24 [Source:HGNC Symbol;Acc:HGNC:33043]	-
ENSG00000204971	0	0	0	0	0	0	0	0	0	AP000812.1	11	72163322	72209241	-	477	antisense	novel transcript	-
ENSG00000144847	0.158483	0	0.0266236	0.0586786	0.148659	0.0476287	0.0482845	0.101194	0.0493485	IGSF11	3	118900557	119146068	-	4899	protein_coding	immunoglobulin superfamily member 11 [Source:HGNC Symbol;Acc:HGNC:16669]	-
ENSG00000086102	15.5881	14.6649	15.2729	17.1109	19.8255	16.8648	14.3104	14.7981	14.5829	NFX1	9	33290511	33371157	+	7147	protein_coding	nuclear transcription factor, X-box binding 1 [Source:HGNC Symbol;Acc:HGNC:7803]	zf-NF-X1
ENSG00000222376	0	0	0	0	0	0	0	0	0	RN7SKP152	2	166180652	166180966	-	315	misc_RNA	RNA, 7SK small nuclear pseudogene 152 [Source:HGNC Symbol;Acc:HGNC:45876]	-
ENSG00000233514	0	0	0	0	0	0	0	0.277861	0	AL356653.1	1	44122153	44122512	-	360	processed_pseudogene	small nuclear ribonucleoprotein D1 polypeptide 16kDa (SNRPD1) pseudogene	-
ENSG00000237743	0	0	0	0	0	0	0	0	0	FBP2P1	9	87810642	87837225	-	530	transcribed_unprocessed_pseudogene	fructose-1,6-bisphosphatase 2 pseudogene 1 [Source:HGNC Symbol;Acc:HGNC:49924]	-
ENSG00000211448	1.34886	1.02571	1.52952	1.28422	1.0845	1.47671	0.550383	1.01506	0.832516	DIO2	14	80197527	80387757	-	7494	protein_coding	iodothyronine deiodinase 2 [Source:HGNC Symbol;Acc:HGNC:2884]	-
ENSG00000224606	0	0	0	0	0	0	0	0	0	TGFA-IT1	2	70467385	70468495	-	436	sense_intronic	TGFA intronic transcript 1 [Source:HGNC Symbol;Acc:HGNC:41389]	-
ENSG00000285108	0.0146029	0.004711	0.0294379	0.0324406	0.0319615	0.0394974	0.00889806	0.0233105	0.0181883	AC103718.1	8	129685401	129723023	-	10728	lincRNA	novel transcript	-
ENSG00000005981	0	0	0	0	0	0	0	0	0	ASB4	7	95478444	95540232	+	4605	protein_coding	ankyrin repeat and SOCS box containing 4 [Source:HGNC Symbol;Acc:HGNC:16009]	-
ENSG00000258345	0	0	0	0	0	0	0	0	0.207578	AC034102.7	12	56118968	56119939	-	470	antisense	novel transcript, antisense to ZC3H10 and ESYT1	-
ENSG00000228772	0	0	0	0	0	0	0	0	0	AL033539.1	6	22589137	22593833	-	743	lincRNA	novel transcript	-
ENSG00000223593	0	0	0	0	0	0	0	0	0	AL356806.1	14	34416687	34417602	-	916	processed_pseudogene	sulfotransferase family 3A, member 1 (Sult3a1) pseudogene	-
ENSG00000251256	0	0	0	0	0	0	0	0	0	LINC02358	4	54845568	54859241	+	465	lincRNA	long intergenic non-protein coding RNA 2358 [Source:HGNC Symbol;Acc:HGNC:53281]	-
ENSG00000244194	0	0	0	0	0	0	0	0	0	RN7SL218P	4	74011578	74011876	+	299	misc_RNA	RNA, 7SL, cytoplasmic 218, pseudogene [Source:HGNC Symbol;Acc:HGNC:46234]	-
ENSG00000247121	0.801625	0.942077	0.865706	1.46281	1.18161	0.980853	0.732685	0.822615	0.74883	AC009126.1	5	96814028	96935809	-	2536	antisense	novel transcript, antisense to LNPEP and ERAP2	-
ENSG00000235954	1.12705	1.45438	1.4726	1.901	1.60537	1.957	1.56427	1.11944	1.94968	TTC28-AS1	22	27919376	28008581	+	10818	processed_transcript	TTC28 antisense RNA 1 [Source:HGNC Symbol;Acc:HGNC:29336]	-
ENSG00000280878	0	0	0	0	0	0	0	0	0	AC017002.5	2	111468810	111637967	+	871	lincRNA	novel transcript	-
ENSG00000253487	0	0	0	0	0	0	0	0	0	IGKV2-36	2	89295233	89295455	-	223	IG_V_pseudogene	immunoglobulin kappa variable 2-36 (pseudogene) [Source:HGNC Symbol;Acc:HGNC:5786]	-
ENSG00000136250	0	0	0	0	0	0	0	0	0	AOAH	7	36512949	36724549	-	3510	protein_coding	acyloxyacyl hydrolase [Source:HGNC Symbol;Acc:HGNC:548]	-
ENSG00000272887	0	0	0	0	0	0	0	0	0	CSPG4P5	15	84401807	84408005	-	3730	transcribed_unprocessed_pseudogene	chondroitin sulfate proteoglycan 4 pseudogene 5 [Source:HGNC Symbol;Acc:HGNC:29403]	-
ENSG00000275875	0	0	0.152565	0	0	0	0	0	0	AC091812.3	7	55741525	55741869	+	345	processed_pseudogene	capicua homolog (Drosophila) (CIC) pseudogene	-
ENSG00000274228	0	0	0	0	0	0	0	0	0	RNA5SP414	16	35748520	35748655	+	136	rRNA_pseudogene	RNA, 5S ribosomal pseudogene 414 [Source:HGNC Symbol;Acc:HGNC:43314]	-
ENSG00000149679	3.59586	3.48014	3.57825	3.73972	4.59755	4.27445	3.43315	4.32147	3.80834	CABLES2	20	62388632	62407285	-	3785	protein_coding	Cdk5 and Abl enzyme substrate 2 [Source:HGNC Symbol;Acc:HGNC:16143]	-
ENSG00000229131	0	0	0	0	0	0	0	0	0	AC016710.1	2	139469775	139477747	+	466	lincRNA	novel transcript	-
ENSG00000205683	5.22754	5.05932	4.5721	10.8143	11.0264	11.9947	4.57573	5.24522	4.15982	DPF3	14	72619296	72894116	-	6889	protein_coding	double PHD fingers 3 [Source:HGNC Symbol;Acc:HGNC:17427]	-
ENSG00000250145	0	0	0	0	0	0	0	0	0	AC114940.1	5	106543066	106544330	-	1265	processed_pseudogene	zinc finger protein family pseudogene	-
ENSG00000238220	0	0	0	0	0	0	0	0	0	AP000275.1	21	32624416	32625096	-	390	processed_pseudogene	ribosomal protein S24 (RPS24) pseudogene	-
ENSG00000231443	0.126136	0.244153	0.0847583	0	0.236634	0.0379074	0	0.161079	0	AC124944.2	3	195937243	195938739	+	1242	processed_pseudogene	protein phosphatase 4, regulatory subunit 2 (PPP4R2) pseudogene	-
ENSG00000216069	0	0	0	0	0	0	0	0	0	MIR875	8	99536786	99536861	-	76	miRNA	microRNA 875 [Source:HGNC Symbol;Acc:HGNC:33652]	-
ENSG00000102125	9.07958	7.91351	6.87642	11.311	8.94027	10.4474	6.8774	8.4079	7.31011	TAZ	X	154411518	154421726	+	4721	protein_coding	tafazzin [Source:HGNC Symbol;Acc:HGNC:11577]	-
ENSG00000250826	0	0	0	0	0	0	0	0	0	HNRNPA3P13	4	82128535	82129656	+	1122	processed_pseudogene	heterogeneous nuclear ribonucleoprotein A3 pseudogene 13 [Source:HGNC Symbol;Acc:HGNC:48759]	-
ENSG00000145358	10.358	10.176	14.1043	23.7051	23.3184	22.8357	7.50234	10.9689	7.81371	DDIT4L	4	100185870	100190782	-	2994	protein_coding	DNA damage inducible transcript 4 like [Source:HGNC Symbol;Acc:HGNC:30555]	-
ENSG00000172757	839.408	801.906	883.814	1137.28	1118.35	1119.13	763.267	948.188	851.008	CFL1	11	65823022	65862026	-	5863	protein_coding	cofilin 1 [Source:HGNC Symbol;Acc:HGNC:1874]	-
ENSG00000235065	1.31924	1.91519	1.1081	1.95381	2.68119	0.89206	2.3111	0.842358	1.74584	RPL24P2	20	21114723	21115197	+	475	processed_pseudogene	ribosomal protein L24 pseudogene 2 [Source:HGNC Symbol;Acc:HGNC:16597]	-
ENSG00000255396	0	0	0	0	0	0	0	0	0	AP000857.1	11	84997226	84997768	-	543	processed_pseudogene	ras homolog gene family, member B (RHOB) pseudogene	-
ENSG00000278274	0	0	0	0	0	0	0	0	0	SNORA61	1	28579764	28579893	-	130	snoRNA	small nucleolar RNA, H/ACA box 61 [Source:HGNC Symbol;Acc:HGNC:32655]	-
ENSG00000182586	0.188294	0.668192	0.189789	0.0697161	0.294371	0.0565877	0.1721	0.240457	0.762202	LINC00334	21	45234340	45264548	+	1764	lincRNA	long intergenic non-protein coding RNA 334 [Source:HGNC Symbol;Acc:HGNC:16425]	-
ENSG00000222468	0	0	0	0	0	0	0	0	0	RNA5SP261	8	31598099	31598204	-	106	rRNA_pseudogene	RNA, 5S ribosomal pseudogene 261 [Source:HGNC Symbol;Acc:HGNC:43161]	-
ENSG00000283212	0	0	0	0	0	0	0	0	0	MIR642B	19	45674932	45675008	-	77	miRNA	microRNA 642b [Source:HGNC Symbol;Acc:HGNC:38902]	-
ENSG00000274677	0	0.0825811	0.0860048	0	0.240114	0.153859	0.0779889	0	0.0797074	AC040169.3	16	84085979	84086590	-	612	sense_intronic	novel transcript, sense intronic to MBTPS1	-
ENSG00000259360	0	0	0	0	0	0	0.0821501	0	0	AC009558.1	15	47397501	47399554	-	581	antisense	novel transcript, antisense to SEMA6D	-
ENSG00000261654	0.0698013	0.00844439	0.0439724	0.0290746	0.0409217	0.015733	0.0079748	0	0.00815053	AL360270.2	1	110936369	110942353	-	5985	sense_overlapping	novel transcript, sense overlapping C1orf103	-
ENSG00000254592	0	0	0	0	0	0	0	0	0	AC123788.1	11	3336721	3340630	+	783	antisense	novel transcript	-
ENSG00000285410	1.01338	0.895488	0.683916	1.13541	1.15722	1.08844	0.821528	1.09719	1.23475	GABPB1-IT1	15	50348936	50354861	-	5926	sense_intronic	GABPB1 intronic transcript [Source:HGNC Symbol;Acc:HGNC:25469]	-
ENSG00000155754	0.217041	0.210057	0.284395	0.24108	0.285023	0.469635	0.198376	0.311814	0.263571	C2CD6	2	201487425	201619178	-	6815	protein_coding	C2 calcium dependent domain containing 6 [Source:HGNC Symbol;Acc:HGNC:14438]	-
ENSG00000222287	0	0	0	0	0.494781	0	0	0.505202	0	RNU6-1043P	16	30701337	30701435	-	99	snRNA	RNA, U6 small nuclear 1043, pseudogene [Source:HGNC Symbol;Acc:HGNC:48006]	-
ENSG00000254436	0	0	0	0	0	0	0	0	0	AP000648.1	11	90098421	90098817	-	397	processed_pseudogene	tripartite motif-containing protein 43 (TRIM43) pseudogene	-
ENSG00000233129	0	0	0	0	0	0	0	0	0	AL117351.1	1	93934479	93935244	-	766	processed_pseudogene	pseudogene similar to part of NADH dehydrogenase 2 (MTND2)	-
ENSG00000146021	1.88044	1.61074	2.41824	3.38515	2.98036	2.68923	1.65946	1.13859	2.09984	KLHL3	5	137617500	137736090	-	11854	protein_coding	kelch like family member 3 [Source:HGNC Symbol;Acc:HGNC:6354]	-
ENSG00000207138	0	0	0	0	0	0	0	0	0	RNU6-869P	8	126504763	126504869	+	107	snRNA	RNA, U6 small nuclear 869, pseudogene [Source:HGNC Symbol;Acc:HGNC:47832]	-
ENSG00000267098	0	0	0	0	0	0	0	0	0	AC113137.1	18	60630167	60902726	-	558	lincRNA	novel transcript	-
ENSG00000173988	0.0248431	0.0240436	0	0	0.0233032	0.0671945	0.0227066	0	0.0232069	LRRC63	13	46211943	46277366	+	2677	protein_coding	leucine rich repeat containing 63 [Source:HGNC Symbol;Acc:HGNC:34296]	-
ENSG00000197565	1.91857	1.55299	2.07446	4.05548	4.31917	4.50786	1.2647	1.51459	1.72705	COL4A6	X	108155607	108439497	-	9282	protein_coding	collagen type IV alpha 6 chain [Source:HGNC Symbol;Acc:HGNC:2208]	-
ENSG00000279530	0.1567	0.1327	0.0789721	0.0435137	0.128613	0.0176598	0.0358058	0.0375206	0.0182974	AC092881.1	12	70321542	70324274	-	2733	TEC	TEC	-
ENSG00000114013	0.0374338	0	0	0	0	0	0	0	0	CD86	3	122055366	122121139	+	3433	protein_coding	CD86 molecule [Source:HGNC Symbol;Acc:HGNC:1705]	-
ENSG00000280171	0	0	0	0	0	0	0	0	0	AC010329.5	19	20674923	20696533	+	2174	unprocessed_pseudogene	novel zinc finger pseudogene	-
ENSG00000220256	0	0	0	0	0	0	0	0	0	AC093802.1	2	239762860	239802883	+	3238	lincRNA	uncharacterized LOC150935 [Source:NCBI gene;Acc:150935]	-
ENSG00000199803	0	0	0	0	0	0	0	0	0	RNU6-1159P	20	15021553	15021659	-	107	snRNA	RNA, U6 small nuclear 1159, pseudogene [Source:HGNC Symbol;Acc:HGNC:48122]	-
ENSG00000127364	0.0439194	0.063759	0.110671	0.0487837	0.102993	0.0593956	0.0802846	0	0.0615403	TAS2R4	7	141778442	141780819	+	2378	protein_coding	taste 2 receptor member 4 [Source:HGNC Symbol;Acc:HGNC:14911]	-
ENSG00000232542	0	0	0	0	0	0.234818	0	0	0	DPYD-IT1	1	97394154	97420141	-	401	sense_intronic	DPYD intronic transcript 1 [Source:HGNC Symbol;Acc:HGNC:41326]	-
ENSG00000182218	2.38547	2.80193	2.64486	2.03543	2.50205	2.28757	2.4479	2.59629	2.77533	HHIPL1	14	99645110	99680569	+	7836	protein_coding	HHIP like 1 [Source:HGNC Symbol;Acc:HGNC:19710]	-
ENSG00000283203	0	0	0	0	0	0	0	0	0	MIR1246	2	176600980	176601052	-	73	miRNA	microRNA 1246 [Source:HGNC Symbol;Acc:HGNC:35312]	-
ENSG00000252750	0	0	0	0	0	0	0	0	0	RNU7-70P	1	112634719	112634784	-	66	snRNA	RNA, U7 small nuclear 70 pseudogene [Source:HGNC Symbol;Acc:HGNC:34166]	-
ENSG00000283340	0	0	0	0	0	0	0	0	0	MIR3119-1	1	170151378	170151462	-	85	miRNA	microRNA 3119-1 [Source:HGNC Symbol;Acc:HGNC:38253]	-
ENSG00000244187	19.4419	19.9826	19.7583	24.6293	22.8338	23.468	20.1931	23.8533	23.1897	TMEM141	9	136791355	136793257	+	1443	protein_coding	transmembrane protein 141 [Source:HGNC Symbol;Acc:HGNC:28211]	-
ENSG00000224452	0.390674	0.504136	0.656296	0.289296	0.244306	0.117409	0.119025	0.249451	0.243296	RSL24D1P6	20	32170390	32170790	-	401	processed_pseudogene	ribosomal L24 domain containing 1 pseudogene 6 [Source:HGNC Symbol;Acc:HGNC:37876]	-
ENSG00000185345	0.422493	0.286228	0.0425849	0.281572	0.079261	0	0.154463	0.606978	0.513068	PRKN	6	161347420	162727771	-	5686	protein_coding	parkin RBR E3 ubiquitin protein ligase [Source:HGNC Symbol;Acc:HGNC:8607]	-
ENSG00000238382	0	0	0	0	0	0	0	0	0	RNU6-1211P	1	232700204	232700308	+	105	snRNA	RNA, U6 small nuclear 1211, pseudogene [Source:HGNC Symbol;Acc:HGNC:48174]	-
ENSG00000274892	0	0	0	0	0	0	0	0	0	AC011487.4	19	53512092	53512616	-	525	unprocessed_pseudogene	FSHD region gene 2 family, member C (FRG2C) pseudogene	-
ENSG00000228541	0	0	0	0	0	0	0	0	0	AC093159.1	2	62463127	62464070	+	424	lincRNA	novel transcript	-
ENSG00000224333	0	0	0	0	0	0	0	0	0	GAPDHP20	1	32402109	32403115	-	1007	processed_pseudogene	glyceraldehyde 3 phosphate dehydrogenase pseudogene 20 [Source:HGNC Symbol;Acc:HGNC:37772]	-
ENSG00000112877	1.17401	0.818088	1.94068	1.66917	1.67389	3.34478	1.03013	1.07946	1.18443	CEP72	5	612272	667168	+	3658	protein_coding	centrosomal protein 72 [Source:HGNC Symbol;Acc:HGNC:25547]	-
ENSG00000279205	0.0964657	0.0311205	0	0	0	0	0.0587798	0	0	AC092162.3	2	176822030	176823653	+	1624	TEC	TEC	-
ENSG00000219249	0	0	0	0	0	0	0	0	0	AMZ2P2	6	158725747	158726803	-	1057	processed_pseudogene	archaelysin family metallopeptidase 2 pseudogene 2 [Source:HGNC Symbol;Acc:HGNC:38072]	-
ENSG00000270972	0	0	0	0	0	0	0	0	0	AC136475.9	11	333192	333688	+	497	lincRNA	novel transcript	-
ENSG00000224851	0	0	0	0	0	0	0	0	0	LINC00502	10	91033157	91062164	+	1000	lincRNA	long intergenic non-protein coding RNA 502 [Source:HGNC Symbol;Acc:HGNC:43442]	-
ENSG00000137656	3.6189	4.2398	4.0956	4.51336	5.53854	4.69378	3.71388	3.52689	3.32126	BUD13	11	116748170	116772988	-	2196	protein_coding	BUD13 homolog [Source:HGNC Symbol;Acc:HGNC:28199]	-
ENSG00000236105	0	0	0	0	0	0.161236	0	0	0	PRELID3BP10	7	127295620	127296203	+	584	processed_pseudogene	PRELI domain containing 3B pseudogene 10 [Source:HGNC Symbol;Acc:HGNC:49072]	-
ENSG00000257864	0	0.0882018	0	0	0	0.164331	0	0	0	AC025030.1	12	44248432	44249004	-	573	processed_pseudogene	IQ motif containing F1 (IQCF1) pseudogene	-
ENSG00000260793	0.441421	0	0.133478	0.245155	0.041406	0.159192	0.322767	0.380503	0.288645	AC003102.1	17	44221401	44223710	+	2012	antisense	novel transcript, antisense to UBTF	-
ENSG00000164841	0.0348599	0.101214	0	0.0774416	0	0.0314292	0.0637239	0.0333878	0.0651281	TMEM74	8	108606850	108787615	-	2877	protein_coding	transmembrane protein 74 [Source:HGNC Symbol;Acc:HGNC:26409]	-
ENSG00000215603	0	0.0424346	0	0	0	0	0	0	0	ZNF92P1Y	Y	7853686	7854876	-	1191	processed_pseudogene	zinc finger protein 92 pseudogene 1, Y-linked [Source:HGNC Symbol;Acc:HGNC:39553]	-
ENSG00000279427	0	0	0	0	0	0	0	0	0	AC007490.1	16	52436772	52437474	-	703	TEC	novel transcript	-
ENSG00000147955	76.3754	82.5211	87.4903	108.667	103.162	104.275	76.656	84.9185	85.6058	SIGMAR1	9	34634722	34637809	-	2196	protein_coding	sigma non-opioid intracellular receptor 1 [Source:HGNC Symbol;Acc:HGNC:8157]	-
ENSG00000213067	0	0	0	0	0	0	0	0	0	AC092447.1	7	56597379	56598342	+	964	processed_pseudogene	insulin-like growth factor 2 mRNA binding protein 3 (IGF2BP3) pseudogene	-
ENSG00000236914	0.718296	0.695181	0.724002	1.27656	0.875905	1.23045	0.984784	0.96315	0.738089	LINC01852	15	38069481	38072959	-	1793	lincRNA	long intergenic non-protein coding RNA 1852 [Source:HGNC Symbol;Acc:HGNC:52668]	-
ENSG00000282339	0	0	0	0	0	0	0	0	0	AC010507.2	19	200499	201174	-	676	transcribed_processed_pseudogene	novel pseudogene	-
ENSG00000172939	37.1779	34.2039	37.4733	43.195	47.3495	45.7676	34.0385	36.7302	33.0137	OXSR1	3	38165089	38255488	+	6075	protein_coding	oxidative stress responsive 1 [Source:HGNC Symbol;Acc:HGNC:8508]	-
ENSG00000111331	29.8094	17.7973	12.8725	2.59159	2.6781	3.68123	11.9253	4.91035	3.92886	OAS3	12	112938352	112973249	+	8251	protein_coding	2'-5'-oligoadenylate synthetase 3 [Source:HGNC Symbol;Acc:HGNC:8088]	-
ENSG00000281160	0	0	0	0	0	0	0	0	0	AC018358.1	3	42264989	42266390	+	1402	antisense	novel transcript, antisense to CCK	-
ENSG00000235975	0	0	0	0	0	0	0	0	0	Z83313.1	X	138806374	138807091	+	718	processed_pseudogene	tropomyosin 2 (beta) (TPM2) pseudogene	-
ENSG00000259744	0.0691657	0.13388	0.13943	0.460957	0.648785	0.56123	0.189652	0.92743	0.193832	AC009269.4	15	70848883	70849770	-	755	sense_intronic	novel transcript, sense intronic to LARP6	-
ENSG00000220960	0	0.209708	0	0	0	0.195357	0	0.103766	0	AL079342.2	6	89059628	89060109	+	482	processed_pseudogene	adaptor-related (clathrin-associated) protein complex 4, sigma 1 subunit (AP4S1) pseudogene	-
ENSG00000220326	0	0	0	0	0	0	0	0	0	AL603865.2	6	121641009	121641221	-	213	processed_pseudogene	cytochrome c oxidase subunit VIc (COX6C) pseudogene	-
ENSG00000177803	0	0	0	0	0	0	0	0	0	AC112247.1	4	163932526	163933182	+	657	processed_pseudogene	tyrosine 3-monooxygenase/tryptophan 5-monooxygenase activation protein, theta polypeptide (YWHAQ) pseudogene	-
ENSG00000107643	8.56665	9.31411	9.14911	11.0744	11.2157	10.7966	10.4621	8.90319	9.09216	MAPK8	10	48306639	48439360	+	9674	protein_coding	mitogen-activated protein kinase 8 [Source:HGNC Symbol;Acc:HGNC:6881]	-
ENSG00000259248	0.0445564	0.129368	0.134731	0.0989825	0.167178	0.0401715	0.0814491	0.128025	0.041622	USP3-AS1	15	63544247	63601589	-	7141	antisense	USP3 antisense RNA 1 [Source:HGNC Symbol;Acc:HGNC:44140]	-
ENSG00000227736	0	0	0	0	0	0	0	0	0	MTCO3P16	2	201552859	201553612	+	754	unprocessed_pseudogene	MT-CO3 pseudogene 16 [Source:HGNC Symbol;Acc:HGNC:52046]	-
ENSG00000161016	1181.63	1192.83	1131.03	1266.39	1238.01	1258.77	1195.85	1368.56	1302.69	RPL8	8	144789765	144792587	-	2159	protein_coding	ribosomal protein L8 [Source:HGNC Symbol;Acc:HGNC:10368]	-
ENSG00000132153	34.805	33.3905	40.9326	47.7264	51.5514	49.2293	32.947	36.0059	34.7623	DHX30	3	47802909	47850195	+	7744	protein_coding	DExH-box helicase 30 [Source:HGNC Symbol;Acc:HGNC:16716]	-
ENSG00000181852	54.2232	55.2632	54.1705	45.4065	44.3258	45.3005	55.207	54.8246	57.873	RNF41	12	56202175	56221933	-	6537	protein_coding	ring finger protein 41 [Source:HGNC Symbol;Acc:HGNC:18401]	-
ENSG00000249563	0	0	0	0	0	0	0	0	0	AC098976.1	4	9733370	9742361	+	541	unprocessed_pseudogene	chromosome 21 open reading frame 63 (C21orf63) pseudogene	-
ENSG00000199133	2.40092	1.74275	1.815	0.66671	1.12605	0	1.09722	3.44931	2.8035	MIRLET7D	9	94178834	94178920	+	87	miRNA	microRNA let-7d [Source:HGNC Symbol;Acc:HGNC:31481]	-
ENSG00000112212	0	0	0.199375	0	0	0	0	0	0	TSPO2	6	41042554	41044337	+	988	protein_coding	translocator protein 2 [Source:HGNC Symbol;Acc:HGNC:21256]	-
ENSG00000186971	0	0	0	0	0	0	0	0	0	KRTAP13-4	21	30430230	30431026	+	797	protein_coding	keratin associated protein 13-4 [Source:HGNC Symbol;Acc:HGNC:18926]	-
ENSG00000182247	26.1871	29.1709	25.3082	29.0874	24.901	25.2302	25.2491	27.6386	26.1892	UBE2E2	3	23203020	23591793	+	3274	protein_coding	ubiquitin conjugating enzyme E2 E2 [Source:HGNC Symbol;Acc:HGNC:12478]	-
ENSG00000228928	0	0	0	0	0	0	0	0	0	KPNA2P2	7	88564793	88566281	-	1489	processed_pseudogene	karyopherin subunit alpha 2 pseudogene 2 [Source:HGNC Symbol;Acc:HGNC:52872]	-
ENSG00000259103	0	0	0	0	0	0	0	0	0	AF107885.2	14	75814502	75847698	-	1619	antisense	novel transcript, antisense to TTLL5	-
ENSG00000139445	0	0	0	0	0	0	0	0	0	FOXN4	12	109277979	109309220	-	3471	protein_coding	forkhead box N4 [Source:HGNC Symbol;Acc:HGNC:21399]	Fork
ENSG00000011454	34.6114	32.8746	33.5886	32.2617	33.4962	33.1171	34.023	30.0308	31.9429	RABGAP1	9	122940833	123104866	+	9162	protein_coding	RAB GTPase activating protein 1 [Source:HGNC Symbol;Acc:HGNC:17155]	-
ENSG00000161800	10.4763	9.87915	12.7797	35.5064	39.2572	34.5842	9.72261	10.1882	10.8402	RACGAP1	12	49976923	50033136	-	4487	protein_coding	Rac GTPase activating protein 1 [Source:HGNC Symbol;Acc:HGNC:9804]	-
ENSG00000233860	0	0	0.0948377	0	0	0	0	0	0	AC107072.2	4	76756960	76758474	-	555	antisense	novel transcript	-
ENSG00000140400	12.8915	13.7876	12.4761	14.5788	13.4945	13.56	11.8683	11.2288	11.6498	MAN2C1	15	75355207	75368630	-	9142	protein_coding	mannosidase alpha class 2C member 1 [Source:HGNC Symbol;Acc:HGNC:6827]	-
ENSG00000256915	0	0	0	0.318702	0	0.344915	0	0	0	AC090023.2	12	65644334	65663299	+	701	lincRNA	novel transcript	-
ENSG00000272308	0.436076	0.316532	0.329655	0	0.306785	0.786321	0.59786	0.208831	0.203678	AC104113.1	5	60866457	60866935	-	479	lincRNA	novel transcript	-
ENSG00000259030	0.0581732	0.0375341	0.0781804	0.0215387	0.0181891	0.0524481	0	0.0371444	0	FPGT-TNNI3K	1	74198235	74544393	+	9896	protein_coding	FPGT-TNNI3K readthrough [Source:HGNC Symbol;Acc:HGNC:42952]	-
ENSG00000279594	0.0329881	0.127706	0	0.0732833	0.0618867	0.0594832	0	0	0	AL049780.3	14	75011269	75012851	-	1583	TEC	TEC	-
ENSG00000227573	0	0	0	0	0	0	0	0	0	AC004986.1	7	122849746	122850352	+	607	processed_pseudogene	v-rel reticuloendotheliosis viral oncogene homolog A (avian) (RELA) pseudogene	-
ENSG00000115421	3.96465	3.30458	3.75148	3.7387	3.05102	3.37022	3.52016	3.40976	3.0233	PAPOLG	2	60756230	60802085	+	8501	protein_coding	poly(A) polymerase gamma [Source:HGNC Symbol;Acc:HGNC:14982]	-
ENSG00000223836	0	0	0	0	0	0	0	0	0	AC023141.1	7	57820032	57820410	-	379	unprocessed_pseudogene	family with sequence similarity 27 (FAM27) pseudogene	-
ENSG00000285687	0	0	0	0	0	0	0	0	0	AC134684.8	8	7571995	7575006	-	1395	protein_coding	Putative protein FAM90A22P [Source:UniProtKB/Swiss-Prot;Acc:A8MWA6]	-
ENSG00000259608	0	0	0	0	0	0	0	0	0	AC104229.1	15	85958717	85958971	-	255	processed_pseudogene	ADP-ribosylation factor-like 2 binding protein (ARL2BP) pseudogene	-
ENSG00000226906	0	0	0	0	0	0	0	0	0	TTTY4	Y	22936455	22973284	+	1346	lincRNA	testis-specific transcript, Y-linked 4 [Source:HGNC Symbol;Acc:HGNC:16481]	-
ENSG00000258970	0	0	0	0	0	0	0	0	0	AC104002.1	15	27418796	27420735	-	380	antisense	novel transcript, antisense to GABRG3	-
ENSG00000115539	21.5371	21.2438	23.9087	39.3901	35.2569	35.4304	23.6219	23.2273	21.9376	PDCL3	2	100562690	100576735	+	1831	protein_coding	phosducin like 3 [Source:HGNC Symbol;Acc:HGNC:28860]	-
ENSG00000168876	4.01044	4.20823	4.25505	4.07949	3.99944	4.98594	4.55299	4.00282	3.58857	ANKRD49	11	94493629	94499583	+	3526	protein_coding	ankyrin repeat domain 49 [Source:HGNC Symbol;Acc:HGNC:25970]	-
ENSG00000252928	0	0	0	0	0	0	0	0	0	RNU6-64P	13	30281765	30281869	+	105	snRNA	RNA, U6 small nuclear 64, pseudogene [Source:HGNC Symbol;Acc:HGNC:42554]	-
ENSG00000271435	0	0	0	0	0	0	0	0	0	AC068137.2	2	130313934	130314411	-	478	processed_pseudogene	tektin 4 (TEKT4) pseudogene	-
ENSG00000224616	0.371553	0.359596	0.170229	0.112556	0.285155	0.0913602	0.216109	0.323512	0.536401	RTCA-AS1	1	100251528	100266179	-	2776	lincRNA	RTCA antisense RNA 1 [Source:HGNC Symbol;Acc:HGNC:50573]	-
ENSG00000182220	180.93	194.127	178.098	166.067	156.33	164.189	208.688	200.958	203.135	ATP6AP2	X	40579372	40606848	+	9560	protein_coding	ATPase H+ transporting accessory protein 2 [Source:HGNC Symbol;Acc:HGNC:18305]	-
ENSG00000106460	37.0969	35.2464	39.7299	31.5301	31.9849	35.439	33.9665	32.2603	36.187	TMEM106B	7	12211241	12243367	+	13867	protein_coding	transmembrane protein 106B [Source:HGNC Symbol;Acc:HGNC:22407]	-
ENSG00000233824	0	0	0	0	0	0	0	0	0	AC003985.1	7	25321302	25326815	-	362	lincRNA	novel transcript	-
ENSG00000240426	0	0	0	0	0	0	0	0	0	AC096743.1	4	76401251	76401569	+	319	processed_pseudogene	ribosomal protein L36a pseudogene 18	-
ENSG00000212520	0	0	0	0	0	0	0	0	0	RNU6-1250P	10	67808502	67808608	+	107	snRNA	RNA, U6 small nuclear 1250, pseudogene [Source:HGNC Symbol;Acc:HGNC:48213]	-
ENSG00000127666	8.93271	9.04246	8.49264	10.5925	11.1192	9.94729	8.23069	9.82726	8.32185	TICAM1	19	4815932	4831704	-	2676	protein_coding	toll like receptor adaptor molecule 1 [Source:HGNC Symbol;Acc:HGNC:18348]	-
ENSG00000207782	0	0	0	0	0	0	0	0	0	MIR150	19	49500785	49500868	-	84	miRNA	microRNA 150 [Source:HGNC Symbol;Acc:HGNC:31537]	-
ENSG00000166979	1.54956	1.19975	2.03043	2.71086	2.39829	2.68934	1.55793	1.63254	1.51988	EVA1C	21	32412006	32515397	+	4353	protein_coding	eva-1 homolog C [Source:HGNC Symbol;Acc:HGNC:13239]	-
ENSG00000240545	0	0	0	0	0	0	0	0	0	RN7SL492P	4	56794348	56794642	-	295	misc_RNA	RNA, 7SL, cytoplasmic 492, pseudogene [Source:HGNC Symbol;Acc:HGNC:46508]	-
ENSG00000227225	0	0	0	0	0	0	0	0	0	MTND1P14	17	19602259	19603208	+	950	unprocessed_pseudogene	MT-ND1 pseudogene 14 [Source:HGNC Symbol;Acc:HGNC:42063]	-
ENSG00000285860	0	0	0	0	0	0	0	0	0	AC010677.2	7	26226413	26254709	-	697	lincRNA	novel transcript	-
ENSG00000250421	0	0	0	0	0	0	0	0	0	AC106798.1	5	67699429	67902600	-	737	lincRNA	novel transcript	-
ENSG00000284706	0	0	0	0	0	0	0	0	0	AC073869.9	2	131335502	131355769	+	354	unprocessed_pseudogene	fatty acyl CoA reductase 2 (FAR2) pseudogene	-
ENSG00000278944	0	0	0	0	0	0	0	0	0	AC027045.1	17	9791227	9808855	-	202	processed_transcript	novel transcript	-
ENSG00000108344	89.3114	90.3857	101.706	139.383	137.51	132.998	86.5713	94.0712	94.9577	PSMD3	17	39980797	39997960	+	4964	protein_coding	proteasome 26S subunit, non-ATPase 3 [Source:HGNC Symbol;Acc:HGNC:9560]	-
ENSG00000235880	0	0	0	0	0	0	0	0	0	AL158832.1	9	267966	273002	-	406	antisense	novel transcript	-
ENSG00000214650	0.285133	0.197112	0.123171	0.0452447	0	0	0.111691	0.273093	0.0761013	AC073592.1	12	124513222	124514813	+	1282	lincRNA	novel transcript	-
ENSG00000267004	0	0	0	0	0	0	0	0	0	AC018761.1	19	12725517	12725886	-	97	lincRNA	novel transcript	-
ENSG00000263712	0	0	0	0	0	0	0	0	0	MIR4639	6	16141556	16141624	+	69	miRNA	microRNA 4639 [Source:HGNC Symbol;Acc:HGNC:41645]	-
ENSG00000112486	0	0	0	0	0	0	0	0	0	CCR6	6	167111807	167139696	+	4346	protein_coding	C-C motif chemokine receptor 6 [Source:HGNC Symbol;Acc:HGNC:1607]	-
ENSG00000173517	53.0414	46.7641	50.7999	36.7028	37.633	37.7758	48.5674	38.4781	45.3541	PEAK1	15	77100656	77420144	-	24184	protein_coding	pseudopodium enriched atypical kinase 1 [Source:HGNC Symbol;Acc:HGNC:29431]	-
ENSG00000056277	0.980511	1.0561	1.08394	2.07282	1.86914	2.06746	0.867278	1.37837	1.04889	ZNF280C	X	130202711	130268899	-	4634	protein_coding	zinc finger protein 280C [Source:HGNC Symbol;Acc:HGNC:25955]	-
ENSG00000258172	0	0	0	0	0	0	0	0	0	AC073655.1	12	94272150	94277195	-	493	antisense	novel transcript, antisense to PLXNC1	-
ENSG00000272832	0	0	0	0.14393	0	0	0	0	0	AC022296.3	3	133543064	133543466	-	403	lincRNA	novel transcript	-
ENSG00000101850	0.746891	0.180714	0.752824	1.10615	0.175149	1.17843	0.739546	0.774964	0.406992	GPR143	X	9725346	9786297	-	2486	protein_coding	G protein-coupled receptor 143 [Source:HGNC Symbol;Acc:HGNC:20145]	-
ENSG00000151789	0.065727	0.0954178	0.0331246	0.0730066	0.0308265	0.0888879	0.0300372	0	0	ZNF385D	3	21412222	22373321	-	13621	protein_coding	zinc finger protein 385D [Source:HGNC Symbol;Acc:HGNC:26191]	-
ENSG00000106009	8.53133	9.00598	9.55816	11.6975	10.9222	10.0327	8.06296	10.349	8.557	BRAT1	7	2537877	2555727	-	6639	protein_coding	BRCA1 associated ATM activator 1 [Source:HGNC Symbol;Acc:HGNC:21701]	-
ENSG00000131653	84.9635	87.1467	85.9704	87.2147	89.0525	88.9024	93.3084	89.0808	87.1904	TRAF7	16	2155698	2178129	+	4489	protein_coding	TNF receptor associated factor 7 [Source:HGNC Symbol;Acc:HGNC:20456]	-
ENSG00000112659	10.3125	8.50285	7.90826	8.34962	8.08676	8.21746	8.58825	7.55962	8.00947	CUL9	6	43182175	43224587	+	12251	protein_coding	cullin 9 [Source:HGNC Symbol;Acc:HGNC:15982]	-
ENSG00000174640	0	0	0	0	0	0	0	0	0	SLCO2A1	3	133928145	134052184	-	9834	protein_coding	solute carrier organic anion transporter family member 2A1 [Source:HGNC Symbol;Acc:HGNC:10955]	-
ENSG00000178723	0	0	0	0	0	0	0	0	0	GLULP4	9	34917175	34918296	+	1122	processed_pseudogene	glutamate-ammonia ligase pseudogene 4 [Source:HGNC Symbol;Acc:HGNC:4345]	-
ENSG00000259449	0	0	0	0	0	0	0	0	0	NIFKP8	15	85181210	85182083	-	874	processed_pseudogene	nucleolar protein interacting with the FHA domain of MKI67 pseudogene 8 [Source:HGNC Symbol;Acc:HGNC:44956]	-
ENSG00000235735	0	0	0	0	0	0	0	0	0	RPL7AP72	X	128313281	128314048	+	768	processed_pseudogene	ribosomal protein L7a pseudogene 72 [Source:HGNC Symbol;Acc:HGNC:36442]	-
ENSG00000235321	0	0	0	0	0	0	0	0	0	AC007556.1	2	169100743	169101210	+	307	antisense	novel transcript	-
ENSG00000253618	0	0	0	0	0	0.587044	0	0	0	GRPEL2-AS1	5	149348116	149357642	-	401	antisense	GRPEL2 antisense RNA 1 [Source:HGNC Symbol;Acc:HGNC:48999]	-
ENSG00000162402	28.5533	25.0014	31.549	35.1778	39.1965	39.889	23.9491	23.5528	25.4145	USP24	1	55066359	55215113	-	11772	protein_coding	ubiquitin specific peptidase 24 [Source:HGNC Symbol;Acc:HGNC:12623]	-
ENSG00000244055	0.704318	0.292137	0.202832	0	0.18876	0.544288	0.183927	0.289104	0.563942	AC007566.1	7	92457564	92491610	+	701	antisense	novel transcript, antisense to ERVW-1 and PEX1	-
ENSG00000211915	0	0	0	0	0	0	0	0	0	IGHD5-18	14	105893542	105893561	-	20	IG_D_gene	immunoglobulin heavy diversity 5-18 [Source:HGNC Symbol;Acc:HGNC:5509]	-
ENSG00000283033	0	0	0	0	0	0	0	0	0	AC022596.2	17	16861146	16864223	+	3078	lincRNA	novel transcript	-
ENSG00000188581	0	0	0	0	0.0542451	0	0	0	0	KRTAP1-1	17	41040559	41041461	-	903	protein_coding	keratin associated protein 1-1 [Source:HGNC Symbol;Acc:HGNC:16772]	-
ENSG00000135315	0.584496	0.878303	0.80619	1.05927	1.06768	0.693387	0.871637	0.633474	0.93395	CEP162	6	84124241	84227635	-	5474	protein_coding	centrosomal protein 162 [Source:HGNC Symbol;Acc:HGNC:21107]	-
ENSG00000140025	1.94157	2.03568	2.52778	1.97689	1.59357	2.07871	1.88551	2.16951	1.62477	EFCAB11	14	89794669	89954777	-	8302	protein_coding	EF-hand calcium binding domain 11 [Source:HGNC Symbol;Acc:HGNC:20357]	-
ENSG00000084090	59.8386	55.658	64.228	87.0467	83.7434	88.3935	56.0784	62.3771	54.654	STARD7	2	96184859	96208825	-	4414	protein_coding	StAR related lipid transfer domain containing 7 [Source:HGNC Symbol;Acc:HGNC:18063]	-
ENSG00000108465	1.96501	1.99686	1.2874	2.07351	2.21185	3.01176	1.43681	2.02318	2.2486	CDK5RAP3	17	47967810	47981774	+	6070	protein_coding	CDK5 regulatory subunit associated protein 3 [Source:HGNC Symbol;Acc:HGNC:18673]	-
ENSG00000219738	0	0	0	0	0	0	0	0	0	CD83P1	6	27560822	27561744	-	572	processed_pseudogene	CD83 molecule pseudogene 1 [Source:HGNC Symbol;Acc:HGNC:13946]	-
ENSG00000260845	0	0	0	0	0	0	0	0	0	AC138907.2	16	32735909	32741094	-	866	lincRNA	novel transcript	-
ENSG00000228922	0	0.084656	0	0	0	0	0	0	0	AC234771.2	X	135201731	135215232	+	597	unprocessed_pseudogene	novel pseudogene	-
ENSG00000007933	0	0	0	0	0	0	0	0	0	FMO3	1	171090877	171117819	+	3463	protein_coding	flavin containing monooxygenase 3 [Source:HGNC Symbol;Acc:HGNC:3771]	-
ENSG00000252755	0	0	0.491915	0	0	0	0	0	0	RNU6-703P	8	98048856	98048962	+	107	snRNA	RNA, U6 small nuclear 703, pseudogene [Source:HGNC Symbol;Acc:HGNC:47666]	-
ENSG00000237316	0	0	0	0	0	0	0	0	0	Z82196.2	22	34711908	34724919	-	549	lincRNA	novel transcript	-
ENSG00000240764	0.333143	0.335856	0.433727	0.616733	0.70311	0.450535	0.291805	0.33237	0.181535	PCDHGC5	5	141489121	141512979	+	4990	protein_coding	protocadherin gamma subfamily C, 5 [Source:HGNC Symbol;Acc:HGNC:8718]	-
ENSG00000250966	0	0	0	0.141128	0	0	0.116129	0	0	AC023886.2	4	112564988	112565398	+	411	processed_pseudogene	H3 histone, family 3B (H3.3B) (H3F3B) pseudogene	-
ENSG00000261717	0	0	0	0	0	0	0	0	0	AC009163.4	16	75412684	75464706	-	530	protein_coding	novel TMEM170A-CFDP1 readthrough protein	-
ENSG00000226251	0	0	0	0	0	0	0	0	0	AL451060.1	1	212225278	212238977	-	511	lincRNA	uncharacterized LOC101929541 [Source:NCBI gene;Acc:101929541]	-
ENSG00000013374	21.3115	23.3031	22.2382	19.6128	22.137	24.0177	22.413	22.9631	22.0455	NUB1	7	151341699	151378449	+	5411	protein_coding	negative regulator of ubiquitin like proteins 1 [Source:HGNC Symbol;Acc:HGNC:17623]	-
ENSG00000279478	0	0	0	0	0	0	0	0	0	AC127071.2	12	130383364	130383890	+	527	TEC	novel transcript	-
ENSG00000241035	0	0	0	0	0	0	0	0	0	AL161747.1	14	21398925	21399282	+	358	processed_pseudogene	ubiquitin A-52 residue ribosomal protein fusion product 1 (UBA52) pseudogene	-
ENSG00000226777	0	0	0	0	0	0	0	0	0	FAM30A	14	105917979	105932642	+	9884	lincRNA	family with sequence similarity 30 member A [Source:HGNC Symbol;Acc:HGNC:19955]	-
ENSG00000281103	0	0	0	0	0	0	0	0	0	TRG-AS1	7	38341577	38378804	+	4130	antisense	T cell receptor gamma locus antisense RNA 1 [Source:HGNC Symbol;Acc:HGNC:48974]	-
ENSG00000244734	0.0897253	0	0	0	0	0	0	0	0	HBB	11	5225464	5229395	-	1304	protein_coding	hemoglobin subunit beta [Source:HGNC Symbol;Acc:HGNC:4827]	-
ENSG00000133706	70.9002	70.5041	72.6185	69.7148	73.1704	72.464	70.5289	70.9064	72.0117	LARS	5	146113038	146182660	-	8118	protein_coding	leucyl-tRNA synthetase [Source:HGNC Symbol;Acc:HGNC:6512]	-
ENSG00000271582	0	0	0	0	0	0	0	0	0	AC073111.2	7	150484061	150485135	-	1075	processed_pseudogene	EIF2A eukaryotic translation initiation factor 2A, 65kDa, pseudogene	-
ENSG00000268883	0	0	0.0877249	0.0966729	0	0	0.0397743	0.333433	0.0813016	PNMA6B	X	153075769	153076968	-	1200	unprocessed_pseudogene	PNMA family member 6B (pseudogene) [Source:HGNC Symbol;Acc:HGNC:26681]	-
ENSG00000248639	0	0	0	0	0	0	0	0	0	AC098799.1	4	68293127	68294364	+	800	processed_pseudogene	UDP glucuronos...yltransferase 2 family, polypeptide B4 (UGT2B4) pseudogene	-
ENSG00000234231	0	0	0	0.0280211	0	0.113722	0	0	0	AC093616.1	2	87700984	87738105	+	2070	transcribed_unprocessed_pseudogene	anaphase-promoting complex subunit 1-like [Source:NCBI gene;Acc:730268]	-
ENSG00000178568	0.154107	0.181107	0.221901	0.0855873	0.134229	0.258032	0.130792	0.168685	0.205653	ERBB4	2	211375717	212538841	-	13015	protein_coding	erb-b2 receptor tyrosine kinase 4 [Source:HGNC Symbol;Acc:HGNC:3432]	-
ENSG00000252661	0	0	0	0	0	0	0	0	0	RNU6-782P	19	15145215	15145318	+	104	snRNA	RNA, U6 small nuclear 782, pseudogene [Source:HGNC Symbol;Acc:HGNC:47745]	-
ENSG00000088881	0.360591	0.475891	0.429538	0.983115	0.245993	0.236439	0.779007	0.753522	0.765552	EBF4	20	2692878	2760108	+	3717	protein_coding	early B cell factor 4 [Source:HGNC Symbol;Acc:HGNC:29278]	COE
ENSG00000227373	0	0.0994875	0.207224	0	0.289271	0	0.0939551	0.0984547	0	AL121983.2	1	174115300	174160004	-	1158	lincRNA	uncharacterized LOC102724601 [Source:NCBI gene;Acc:102724601]	-
ENSG00000229750	0	0	0	0.116708	0	0	0	0	0	AC096649.1	2	175167904	175168522	+	497	antisense	novel transcript	-
ENSG00000200407	0	0	0	0	0	0	0	0	0	RNU6-1169P	15	41448742	41448844	-	103	snRNA	RNA, U6 small nuclear 1169, pseudogene [Source:HGNC Symbol;Acc:HGNC:48132]	-
ENSG00000054796	0	0	0	0	0	0	0	0	0	SPO11	20	57329759	57343994	+	1867	protein_coding	SPO11, initiator of meiotic double stranded breaks [Source:HGNC Symbol;Acc:HGNC:11250]	-
ENSG00000222610	0	0	0	0	0	0	0	0	0	RNU6-402P	5	98889731	98889833	+	103	snRNA	RNA, U6 small nuclear 402, pseudogene [Source:HGNC Symbol;Acc:HGNC:47365]	-
ENSG00000279313	0	0	0	0	0	0	0	0	0	CU634019.4	21	6994374	6997737	-	897	lincRNA	novel transcript	-
ENSG00000227511	0	0	0	0	0	0	0	0	0	AC005297.1	X	26170052	26170913	+	862	unprocessed_pseudogene	pseudogene similar to part of melanoma antigen family B proteins	-
ENSG00000224745	0.209299	0.101282	0.316442	0.69744	0.0981629	0	0	0	0	AC063965.1	10	87878692	87880427	+	499	sense_intronic	novel transcript, sense intronic to PTEN	-
ENSG00000206600	0	0	0	0	0	0	0	0	0	RNU6-25P	3	195214787	195214893	+	107	snRNA	RNA, U6 small nuclear 25, pseudogene [Source:HGNC Symbol;Acc:HGNC:34251]	-
ENSG00000243819	0.0594762	0.0575622	0.0599487	0.0990953	0.0836844	0.160869	0.0815419	0.113929	0	RN7SL832P	2	10690344	10692099	+	1756	lincRNA	RNA, 7SL, cytoplasmic 832, pseudogene [Source:HGNC Symbol;Acc:HGNC:46848]	-
ENSG00000224807	0	0	0	0	0	0	0	0	0	DUX4L9	4	190021407	190022665	-	1259	unprocessed_pseudogene	double homeobox 4 like 9 [Source:HGNC Symbol;Acc:HGNC:33855]	-
ENSG00000206952	0	0	0	0	0	0	0	0	0	SNORA50A	16	58559796	58559929	-	134	snoRNA	small nucleolar RNA, H/ACA box 50A [Source:HGNC Symbol;Acc:HGNC:32643]	-
ENSG00000159714	11.0833	9.32051	9.70692	8.29943	7.86536	8.98206	11.9892	10.5357	10.1982	ZDHHC1	16	67394152	67416833	-	3540	protein_coding	zinc finger DHHC-type containing 1 [Source:HGNC Symbol;Acc:HGNC:17916]	-
ENSG00000108854	128.864	114.483	134.452	211.334	210.574	207.912	108.359	132.927	108.115	SMURF2	17	64542295	64662068	-	6961	protein_coding	SMAD specific E3 ubiquitin protein ligase 2 [Source:HGNC Symbol;Acc:HGNC:16809]	-
ENSG00000162444	0.0697198	0.202428	0.140547	0.154883	0.326991	0.565726	0	0.200327	0.455897	RBP7	1	9997206	10016020	+	861	protein_coding	retinol binding protein 7 [Source:HGNC Symbol;Acc:HGNC:30316]	-
ENSG00000135018	60.8488	59.4546	67.5218	87.2297	92.6478	90.9491	59.4874	62.6583	58.7674	UBQLN1	9	83659963	83708203	-	7117	protein_coding	ubiquilin 1 [Source:HGNC Symbol;Acc:HGNC:12508]	-
ENSG00000188340	0	0	0	0	0	0	0	0	0	OR6N2	1	158774222	158781204	-	3455	protein_coding	olfactory receptor family 6 subfamily N member 2 [Source:HGNC Symbol;Acc:HGNC:15035]	-
ENSG00000259232	0	0	0.354444	0	0	0	0	0.336801	0	AC105129.1	15	65475318	65475614	-	297	processed_pseudogene	target of EGR1, member 1 (nuclear) (TOE1) pseudogene	-
ENSG00000254219	0	0	0	0	0	0	0	0	0	AC087439.2	8	91042690	91044762	-	616	processed_transcript	novel transcript	-
ENSG00000250045	0	0	0	0	0	0	0	0	0	CBX3P3	5	112777630	112778161	-	532	processed_pseudogene	chromobox 3 pseudogene 3 [Source:HGNC Symbol;Acc:HGNC:42875]	-
ENSG00000272264	0	0	0	0	0	0	0	0	0	AC009686.2	8	80032724	80033300	-	577	lincRNA	novel transcript	-
ENSG00000197191	0.764982	1.71453	1.01455	0.760265	1.0197	0.580798	1.10399	0.886927	1.20354	CYSRT1	9	137224635	137226311	+	1297	protein_coding	cysteine rich tail 1 [Source:HGNC Symbol;Acc:HGNC:30529]	-
ENSG00000263369	0	0	0	0	0	0	0	0	0	AC090616.1	17	32106330	32114125	-	447	transcribed_unprocessed_pseudogene	bromodomain PHD finger transcription factor (BPTF) pseudogene	-
ENSG00000249196	0	0	0	0	0	0	0	0	0	TMEM132D-AS1	12	129109629	129113294	+	2271	antisense	TMEM132D antisense RNA 1 [Source:HGNC Symbol;Acc:HGNC:27466]	-
ENSG00000155858	1.57834	1.68875	1.48695	1.05718	1.31684	1.28715	1.69633	1.69401	1.4003	LSM11	5	157743695	157760709	+	6584	protein_coding	LSM11, U7 small nuclear RNA associated [Source:HGNC Symbol;Acc:HGNC:30860]	-
ENSG00000269973	0.404055	0.469263	0.505009	0.484711	0.500294	0.349719	0.339762	0.309595	0.392542	AC010969.2	2	9936360	9939590	+	3231	lincRNA	novel transcript	-
ENSG00000178947	0.00998472	0.0966341	0.0402562	0.0110906	0.0280975	0.00900209	0.0456302	0.0669417	0.111926	SMIM10L2A	X	135421943	135428074	+	5230	protein_coding	small integral membrane protein 10 like 2A [Source:HGNC Symbol;Acc:HGNC:34499]	-
ENSG00000034152	81.0798	77.5909	97.5739	149.225	155.434	135.834	71.7392	90.8453	75.8673	MAP2K3	17	21284672	21315240	+	3783	protein_coding	mitogen-activated protein kinase kinase 3 [Source:HGNC Symbol;Acc:HGNC:6843]	-
ENSG00000224509	0.0813397	0	0	0	0	0	0	0	0	AC010884.1	2	104936241	105038496	-	642	antisense	uncharacterized LOC102724691 [Source:NCBI gene;Acc:102724691]	-
ENSG00000261821	0.010558	0.0204366	0	0.0117274	0	0.00951899	0	0	0.00986271	AC090826.1	15	74365435	74371211	+	4946	antisense	novel transcript, antisense to CYP11A1	-
ENSG00000258692	0	0	0	0	0	0	0	0	0	SALL4P7	14	60493766	60496885	-	3120	transcribed_processed_pseudogene	spalt like transcription factor 4 pseudogene 7 [Source:HGNC Symbol;Acc:HGNC:43900]	-
ENSG00000284693	1.49914	1.24939	0.839472	0.693825	0.624986	1.0137	1.10378	0.757803	1.08921	AL928921.2	1	9425094	9440564	-	2623	lincRNA	uncharacterized LOC100506022 [Source:NCBI gene;Acc:100506022]	-
ENSG00000277526	0	0	0	0	0	0	0	0	0	AC245123.1	8	2589985	2623382	-	1722	lincRNA	uncharacterized LOC101927815 [Source:NCBI gene;Acc:101927815]	-
ENSG00000226791	0	0	0	0	0	0	0	0	0	AC109826.1	2	98761938	98772920	-	2101	lincRNA	uncharacterized LOC101927070 [Source:NCBI gene;Acc:101927070]	-
ENSG00000125430	4.85412	4.35175	4.69955	6.82481	6.49436	6.39186	3.68944	4.63691	3.85427	HS3ST3B1	17	14301083	14349404	+	5367	protein_coding	heparan sulfate-glucosamine 3-sulfotransferase 3B1 [Source:HGNC Symbol;Acc:HGNC:5198]	-
ENSG00000232341	0	0	0	0	0	0	0	0	0	RPL4P2	1	166747379	166748660	+	1282	processed_pseudogene	ribosomal protein L4 pseudogene 2 [Source:HGNC Symbol;Acc:HGNC:36836]	-
ENSG00000104047	9.65521	9.98895	11.2033	11.9194	11.0026	11.2218	11.5168	10.8174	11.627	DTWD1	15	49620980	49656232	+	15053	protein_coding	DTW domain containing 1 [Source:HGNC Symbol;Acc:HGNC:30926]	-
ENSG00000227497	0	0	0	0	0	0	0	0	0	PABPC1P6	2	91877969	91880195	+	1829	processed_pseudogene	poly(A) binding protein cytoplasmic 1 pseudogene 6 [Source:HGNC Symbol;Acc:HGNC:37986]	-
ENSG00000128891	7.85796	6.63936	8.12992	7.15811	7.1369	7.23457	8.51221	8.91987	8.07837	CCDC32	15	40528683	40565057	-	8648	protein_coding	coiled-coil domain containing 32 [Source:HGNC Symbol;Acc:HGNC:28295]	-
ENSG00000188760	1.65832	1.80148	1.80794	1.12775	1.01586	1.2205	1.73223	2.00968	1.89686	TMEM198	2	219543663	219550595	+	2578	protein_coding	transmembrane protein 198 [Source:HGNC Symbol;Acc:HGNC:33704]	-
ENSG00000248378	0	0	0	0	0	0	0	0	0	AC022447.1	5	31743988	31744451	-	464	lincRNA	novel transcript	-
ENSG00000284276	0	0	0	0	0	0	0	0	0	MIR4800	4	2250077	2250156	-	80	miRNA	microRNA 4800 [Source:HGNC Symbol;Acc:HGNC:41877]	-
ENSG00000233021	0	0	0	0	0	0	0	0	0	AL669841.1	10	437561	441170	+	558	antisense	novel transcript	-
ENSG00000257184	0	0	0.0688038	0	0	0.123087	0	0	0	AC004080.3	7	27163535	27180013	-	765	protein_coding	HOXA10-HOXA9 readthrough	Homeobox
ENSG00000154975	0	0	0	0	0	0	0	0	0	CA10	17	51630313	52160017	-	4450	protein_coding	carbonic anhydrase 10 [Source:HGNC Symbol;Acc:HGNC:1369]	-
ENSG00000143815	7.62848	8.06066	9.73207	13.9176	16.3508	13.3568	7.444	7.8711	8.12442	LBR	1	225401502	225428925	-	5257	protein_coding	lamin B receptor [Source:HGNC Symbol;Acc:HGNC:6518]	-
ENSG00000123572	4.66227	3.60724	5.34978	10.0062	10.5997	11.0429	3.20201	4.16266	3.64165	NRK	X	105822543	105958610	+	9573	protein_coding	Nik related kinase [Source:HGNC Symbol;Acc:HGNC:25391]	-
ENSG00000211779	0	0	0	0	0	0	0	0	0	TRAV5	14	21749178	21749705	+	352	TR_V_gene	T cell receptor alpha variable 5 [Source:HGNC Symbol;Acc:HGNC:12143]	-
ENSG00000198792	104.44	108.852	110.427	92.5856	95.6396	91.1704	108.128	100.357	103.732	TMEM184B	22	38219291	38273034	-	7080	protein_coding	transmembrane protein 184B [Source:HGNC Symbol;Acc:HGNC:1310]	-
ENSG00000266028	15.9716	15.5348	15.3217	18.449	18.2971	16.9396	14.6952	12.3956	11.4691	SRGAP2	1	206203345	206464443	+	15675	protein_coding	SLIT-ROBO Rho GTPase activating protein 2 [Source:HGNC Symbol;Acc:HGNC:19751]	-
ENSG00000236541	0	0	0	0	0	0	0	0	0	VN2R9P	11	58040708	58041660	-	953	unitary_pseudogene	vomeronasal 2 receptor 9, pseudogene [Source:HGNC Symbol;Acc:HGNC:33215]	-
ENSG00000202526	0	0	0	0	0	0	0	0	0	RNA5S13	1	228637096	228637214	-	119	rRNA	RNA, 5S ribosomal 13 [Source:HGNC Symbol;Acc:HGNC:34374]	-
ENSG00000234283	0	0	0	0	0	0	0	0	0	LINC01731	1	148271884	148280749	-	420	lincRNA	long intergenic non-protein coding RNA 1731 [Source:HGNC Symbol;Acc:HGNC:52519]	-
ENSG00000138182	0.662605	0.597056	0.690898	2.39832	2.78619	2.43078	0.407228	0.568974	0.448217	KIF20B	10	89701610	89774939	+	6851	protein_coding	kinesin family member 20B [Source:HGNC Symbol;Acc:HGNC:7212]	-
ENSG00000202444	0	0	0	0	0	0	0	0	0	RNU5E-6P	1	44819883	44819997	-	115	snRNA	RNA, U5E small nuclear 6, pseudogene [Source:HGNC Symbol;Acc:HGNC:42522]	-
ENSG00000196526	89.0426	91.2753	94.9573	98.7733	107.5	102.549	92.7733	82.7762	86.1749	AFAP1	4	7758714	7939926	-	10036	protein_coding	actin filament associated protein 1 [Source:HGNC Symbol;Acc:HGNC:24017]	-
ENSG00000273768	0	0.308169	0	0	0.298679	0	0.291032	0.304969	0	RF00003	1	146376807	146376970	+	164	snRNA		-
ENSG00000234173	0	0	0	0	0	0	0	0	0	AL353784.1	10	54486230	54656051	+	2300	antisense	uncharacterized LOC105378311 [Source:NCBI gene;Acc:105378311]	-
ENSG00000282804	0	0	0	0	0	0	0	0	0	AL512428.1	6	24797373	24809798	-	654	protein_coding	novel protein	-
ENSG00000250079	0	0	0	0	0	0	0	0	0	AC093300.1	5	28213359	28214559	-	1201	processed_pseudogene	T, brachyury homolog (mouse) (T) pseudogene	-
ENSG00000273368	0.407174	0	0.102602	0.226136	0.668388	0.367103	0.186079	0.19499	0	AC006566.1	18	8154558	8155070	+	513	sense_intronic	novel transcript, sense intronic to PTPRM	-
ENSG00000057149	0	0	0	0	0	0	0	0	0.0294038	SERPINB3	18	63655197	63661963	-	1777	protein_coding	serpin family B member 3 [Source:HGNC Symbol;Acc:HGNC:10569]	-
ENSG00000132436	1.97146	2.38502	2.64949	4.66637	4.49105	5.20535	2.61706	2.56257	2.43357	FIGNL1	7	50444128	50542535	-	5034	protein_coding	fidgetin like 1 [Source:HGNC Symbol;Acc:HGNC:13286]	-
ENSG00000230941	0	0	0	0	0	0	0	0	0	AC002386.1	7	109322320	109326315	-	398	lincRNA	novel transcript	-
ENSG00000035720	0	0	0	0	0	0	0	0	0	STAP1	4	67558728	67607337	+	1655	protein_coding	signal transducing adaptor family member 1 [Source:HGNC Symbol;Acc:HGNC:24133]	-
ENSG00000226573	0	0	0.501285	0	0	0	0	0	0	AC003071.2	22	30105094	30105408	-	315	processed_pseudogene	ribosomal protein L36 (RPL36) pseudogene	-
ENSG00000260763	0	0	0	0	0	0	0	0	0	AC106799.3	5	4436850	4440259	-	3300	lincRNA	novel transcript	-
ENSG00000197786	0	0	0	0	0	0	0	0	0	OR5B17	11	58358124	58359069	-	946	protein_coding	olfactory receptor family 5 subfamily B member 17 [Source:HGNC Symbol;Acc:HGNC:15267]	-
ENSG00000131697	2.8668	2.85119	2.80975	2.28708	2.28797	2.38475	2.88083	3.15533	2.75197	NPHP4	1	5862811	5992473	-	13167	protein_coding	nephrocystin 4 [Source:HGNC Symbol;Acc:HGNC:19104]	-
ENSG00000270587	1.13797	0.489488	0.764672	1.40445	0.830225	0.797982	0.693402	1.08992	0.944909	AC046185.2	17	63610772	63611184	-	413	processed_pseudogene	family with sequence similarity 136, member A (FAM136A) pseudogene	-
ENSG00000253779	0	0	0	0	0	0	0	0	0	IGLVVI-25-1	22	22679097	22679345	+	249	IG_V_pseudogene	immunoglobulin lambda variable (VI)-25-1 (pseudogene) [Source:HGNC Symbol;Acc:HGNC:15690]	-
ENSG00000133835	44.3401	44.2625	48.9997	45.043	44.4631	46.4798	45.8732	48.6217	45.2137	HSD17B4	5	119452443	119637199	+	10664	protein_coding	hydroxysteroid 17-beta dehydrogenase 4 [Source:HGNC Symbol;Acc:HGNC:5213]	-
ENSG00000279214	0	0	0.0554052	0	0	0	0	0	0	AL109659.3	1	48262230	48263179	-	950	TEC	TEC	-
ENSG00000262633	0	0	0	0	0	0	0	0	0	AC005670.2	17	46923133	47049932	+	1876	protein_coding	novel transcript	-
ENSG00000185897	0	0	0	0	0	0	0	0	0	FFAR3	19	35358460	35360485	+	1855	protein_coding	free fatty acid receptor 3 [Source:HGNC Symbol;Acc:HGNC:4499]	-
ENSG00000175066	5.9313	4.85544	5.38057	5.9843	5.67956	4.81282	5.0372	4.49733	4.29402	GK5	3	142157527	142225607	-	12158	protein_coding	glycerol kinase 5 [Source:HGNC Symbol;Acc:HGNC:28635]	-
ENSG00000278376	0.221741	0.134129	0.335254	0.554176	0.181997	0.224909	0.228006	0.29202	0.310707	AP004609.3	11	118791254	118793137	+	1884	lincRNA	novel transcript	-
ENSG00000254186	0	0	0	0	0	0	0	0	0	AC113414.1	5	162424042	163437326	-	8161	antisense	novel transcript	-
ENSG00000242060	0	0	0	0	0	0	0	0	0	RPS3AP49	18	60149576	60150365	+	790	processed_pseudogene	ribosomal protein S3a pseudogene 49 [Source:HGNC Symbol;Acc:HGNC:36810]	-
ENSG00000259309	0	0	0	0	0	0	0	0	0	AC021818.1	15	69820756	69835111	-	1257	lincRNA	novel transcript	-
ENSG00000207313	0.381169	0	0.384197	0	0	0	0	0	0	SNORA2B	12	48667457	48667593	-	137	snoRNA	small nucleolar RNA, H/ACA box 2B [Source:HGNC Symbol;Acc:HGNC:32585]	-
ENSG00000204442	0.66941	0.695418	0.594255	0.989127	0.835303	0.719807	0.937407	0.735255	0.734324	FAM155A	13	107163510	107866735	-	8503	protein_coding	family with sequence similarity 155 member A [Source:HGNC Symbol;Acc:HGNC:33877]	-
ENSG00000261556	2.6988	1.98256	1.40928	0.830689	1.03701	1.02605	2.4667	1.8997	2.15657	SMG1P7	16	70219574	70246610	-	4433	transcribed_unprocessed_pseudogene	SMG1 pseudogene 7 [Source:HGNC Symbol;Acc:HGNC:49864]	-
ENSG00000221869	42.5817	53.6491	48.1641	28.7089	26.4483	24.47	50.7972	48.4305	55.3657	CEBPD	8	47736909	47739086	-	2178	protein_coding	CCAAT enhancer binding protein delta [Source:HGNC Symbol;Acc:HGNC:1835]	C/EBP
ENSG00000224583	0	0	0	0	0	0	0	0	0.221229	AL356277.2	6	74642384	74652002	+	441	lincRNA	novel transcript	-
ENSG00000184613	0	0	0.0327739	0.0361169	0	0	0	0.0622852	0.0607484	NELL2	12	44508275	44921848	-	6424	protein_coding	neural EGFL like 2 [Source:HGNC Symbol;Acc:HGNC:7751]	-
ENSG00000236336	0	0	0	0	0	0	0	0	0	AL022725.1	6	4774526	4775408	-	369	antisense	uncharacterized LOC101927913 [Source:NCBI gene;Acc:101927913]	-
ENSG00000135960	0	0	0	0	0	0	0	0	0	EDAR	2	108894471	108989372	-	4426	protein_coding	ectodysplasin A receptor [Source:HGNC Symbol;Acc:HGNC:2895]	-
ENSG00000251388	0	0.0816472	0.0850322	0.0937056	0	0	0	0	0	AC079380.1	4	133871246	134010690	-	619	lincRNA	novel transcript	-
ENSG00000175505	5.34829	3.95403	4.45488	8.95222	8.5355	9.17509	5.09202	5.72718	4.0246	CLCF1	11	67364168	67374177	-	1975	protein_coding	cardiotrophin like cytokine factor 1 [Source:HGNC Symbol;Acc:HGNC:17412]	-
ENSG00000254035	0.0774779	0.224954	0.312373	0.172118	0.0726755	0.139706	0.212444	0.0742062	0.0723753	AC104117.3	5	178969390	178990116	+	674	antisense	novel transcript	-
ENSG00000255116	0	0	0	0	0	0	0	0	0	SLC5A4P1	11	124273970	124274581	+	612	processed_pseudogene	solute carrier family 5 member 4 pseudogene 1 [Source:HGNC Symbol;Acc:HGNC:45041]	-
ENSG00000122591	28.5245	27.7282	27.4664	22.7309	22.8331	23.6133	25.9237	26.5463	25.8075	FAM126A	7	22889371	23014130	-	14499	protein_coding	family with sequence similarity 126 member A [Source:HGNC Symbol;Acc:HGNC:24587]	-
ENSG00000222733	0	0	0	0	0	0	0	0	0	RNY4P29	13	58527655	58527751	-	97	misc_RNA	RNA, Ro-associated Y4 pseudogene 29 [Source:HGNC Symbol;Acc:HGNC:42497]	-
ENSG00000274656	0	0	0	0	0	0	0	0	0	RN7SL625P	7	72841437	72841727	-	291	misc_RNA	RNA, 7SL, cytoplasmic 625, pseudogene [Source:HGNC Symbol;Acc:HGNC:46641]	-
ENSG00000283283	0	0	0	0	0	0	0	0.0275261	0	AC013268.4	2	110022447	110050064	-	3634	unprocessed_pseudogene	novel pseudogene, similar to zonadhesin (Zan)	-
ENSG00000238344	0	0	0	0	0	0	0	0.649545	0	SNORD126	14	20326450	20326526	-	77	snoRNA	small nucleolar RNA, C/D box 126 [Source:HGNC Symbol;Acc:HGNC:33565]	-
ENSG00000139679	0.328687	0.874801	0.496947	0.456363	0.616627	0.29634	0.976364	0.472211	0.5757	LPAR6	13	48389567	48444704	-	4348	protein_coding	lysophosphatidic acid receptor 6 [Source:HGNC Symbol;Acc:HGNC:15520]	-
ENSG00000251655	0	0	0	0	0	0	0	0	0	PRB1	12	11351823	11395566	-	1311	protein_coding	proline rich protein BstNI subfamily 1 [Source:HGNC Symbol;Acc:HGNC:9337]	-
ENSG00000228667	0	0	0	0	0	0	0	0	0	AL157385.1	10	24867645	24868190	+	268	processed_pseudogene	pseudogene similar to part of NADH dehydrogenase 6 (MTND6)	-
ENSG00000261514	0	0	0	0	0	0	0	0	0	LINC01976	17	43938363	43938959	+	434	lincRNA	long intergenic non-protein coding RNA 1976 [Source:HGNC Symbol;Acc:HGNC:52803]	-
ENSG00000186280	0.198179	0.0959007	0.259679	0.506295	0.241663	0.14294	0.199249	0.284715	0.0740508	KDM4D	11	94973681	94999518	+	2978	protein_coding	lysine demethylase 4D [Source:HGNC Symbol;Acc:HGNC:25498]	-
ENSG00000236137	0.0428737	0.041494	0.0864284	0	0	0.0386543	0.0391865	0.12319	0.12015	AL445231.1	1	117025482	117059490	-	1946	antisense	uncharacterized LOC101929099 [Source:NCBI gene;Acc:101929099]	-
ENSG00000154582	49.3732	52.993	54.7183	61.5126	61.7138	62.0245	48.5134	60.4737	58.9087	ELOC	8	73939169	73972287	-	4934	protein_coding	elongin C [Source:HGNC Symbol;Acc:HGNC:11617]	-
ENSG00000221400	0	0	0	0	0	0	0	0	0	SNORD3J	10	43417249	43417438	-	190	snoRNA	small nucleolar RNA, C/D box 3J [Source:HGNC Symbol;Acc:HGNC:52243]	-
ENSG00000113721	67.6436	83.7315	60.8854	25.0031	25.487	25.6929	86.8685	56.4756	81.8798	PDGFRB	5	150113837	150155872	-	7137	protein_coding	platelet derived growth factor receptor beta [Source:HGNC Symbol;Acc:HGNC:8804]	-
ENSG00000211955	0	0	0	0	0	0	0	0	0	IGHV3-33	14	106359793	106360324	-	431	IG_V_gene	immunoglobulin heavy variable 3-33 [Source:HGNC Symbol;Acc:HGNC:5596]	-
ENSG00000261904	0	0	0	0	0	0	0	0	0	MTND5P33	16	10720015	10721464	-	1450	unprocessed_pseudogene	MT-ND5 pseudogene 33 [Source:HGNC Symbol;Acc:HGNC:51952]	-
ENSG00000213172	0	0	0	0	0	0	0	0	0	AL031985.1	1	40364766	40365183	+	418	processed_pseudogene	ribosomal protein L10a (RPL10A)	-
ENSG00000184661	1.36554	1.57224	2.01712	5.46564	6.22781	6.17699	1.29114	2.16476	0.945708	CDCA2	8	25458997	25507920	+	3908	protein_coding	cell division cycle associated 2 [Source:HGNC Symbol;Acc:HGNC:14623]	-
ENSG00000235335	0.245549	0	0	0	0	0	0	0	0	AC016723.1	2	167814774	167941144	-	922	antisense	uncharacterized LOC105616981 [Source:NCBI gene;Acc:105616981]	-
ENSG00000111186	119.928	104.385	125.503	280.404	271.208	268.184	108.716	124.455	103.332	WNT5B	12	1529891	1647243	+	4305	protein_coding	Wnt family member 5B [Source:HGNC Symbol;Acc:HGNC:16265]	-
ENSG00000266139	0	0	0	0	0.661936	0	0	0.675878	0	MIR4435-2	2	111321013	111321086	-	74	miRNA	microRNA 4435-2 [Source:HGNC Symbol;Acc:HGNC:41837]	-
ENSG00000271736	0	0	0	0	0	0	0	0	0	AL138900.3	1	157280716	157283068	+	629	lincRNA	novel transcript	-
ENSG00000050426	26.5912	25.1473	28.1298	19.2408	21.4272	22.3303	27.7764	26.9237	26.6852	LETMD1	12	51047962	51060424	+	6032	protein_coding	LETM1 domain containing 1 [Source:HGNC Symbol;Acc:HGNC:24241]	-
ENSG00000260782	0	0	0.0573365	0.0315925	0.0533587	0.0512864	0	0	0.0265691	AC007225.1	16	46789898	46792040	+	1836	processed_pseudogene	nuclear factor (erythroid-derived 2)-like 3 (NFE2L3) pseudogene	-
ENSG00000180801	23.7049	22.8077	27.6462	48.0111	49.9595	52.6898	20.3769	20.7547	21.1067	ARSJ	4	113900284	113979727	-	5146	protein_coding	arylsulfatase family member J [Source:HGNC Symbol;Acc:HGNC:26286]	-
ENSG00000109625	0.0365943	0.10625	0.036885	0.0406473	0.0343261	0.0989789	0.0668944	0.175245	0	CPZ	4	8592660	8619759	+	3447	protein_coding	carboxypeptidase Z [Source:HGNC Symbol;Acc:HGNC:2333]	-
ENSG00000182700	4.22835	3.25921	4.03362	2.71735	2.90387	2.7094	3.39542	3.37001	2.82134	IGIP	5	140125935	140129392	+	3458	protein_coding	IgA inducing protein [Source:HGNC Symbol;Acc:HGNC:33847]	-
ENSG00000269931	0	0	0	0	0	0	0	0	0	AL078623.1	20	12934877	12935783	-	907	lincRNA	novel transcript	-
ENSG00000279420	0	0	0	0	0	0	0	0	0	AC138627.2	16	74053365	74053965	+	601	TEC	novel transcript	-
ENSG00000240199	0	0	0	0	0	0	0	0	0	RN7SL520P	16	75698531	75698816	-	286	misc_RNA	RNA, 7SL, cytoplasmic 520, pseudogene [Source:HGNC Symbol;Acc:HGNC:46536]	-
ENSG00000271304	0	0	0	0	0.0924213	0	0	0	0	DPRXP2	6	35989515	35991374	-	891	transcribed_processed_pseudogene	divergent-paired related homeobox pseudogene 2 [Source:HGNC Symbol;Acc:HGNC:32168]	-
ENSG00000168040	7.11964	8.07097	7.63364	13.1698	10.9354	11.3547	7.674	9.45422	8.18757	FADD	11	70203163	70207390	+	1841	protein_coding	Fas associated via death domain [Source:HGNC Symbol;Acc:HGNC:3573]	-
ENSG00000229485	0	0	0	0	0	0	0	0	0	KSR1P1	10	42149310	42149549	-	240	processed_pseudogene	kinase suppressor of ras 1 pseudogene 1 [Source:HGNC Symbol;Acc:HGNC:44977]	-
ENSG00000110583	15.5997	16.9893	16.0953	17.1226	17.6769	16.1259	15.7412	17.7313	16.9838	NAA40	11	63938959	63957328	+	5321	protein_coding	N(alpha)-acetyltransferase 40, NatD catalytic subunit [Source:HGNC Symbol;Acc:HGNC:25845]	-
ENSG00000272112	0.496389	0.576498	0.300199	0.33082	0.372497	0.71606	0.36296	0.380342	0.278218	AC011374.2	5	151724831	151725356	-	526	lincRNA	novel transcript	-
ENSG00000129864	0	0	0	0	0	0	0	0	0	VCY	Y	13985772	13986513	-	550	protein_coding	variable charge Y-linked [Source:HGNC Symbol;Acc:HGNC:12668]	-
ENSG00000207321	0	0	0	0	0	0	0	0	0	RNU6-160P	1	153331622	153331728	+	107	snRNA	RNA, U6 small nuclear 160, pseudogene [Source:HGNC Symbol;Acc:HGNC:47123]	-
ENSG00000122705	233.159	247.79	261.234	318.343	302.357	300.734	241.092	281.334	259.785	CLTA	9	36190856	36304781	+	2515	protein_coding	clathrin light chain A [Source:HGNC Symbol;Acc:HGNC:2090]	-
ENSG00000197275	0.531052	0.556793	0.802906	0.884803	0.913248	0.598487	0.485382	0.635784	0.661437	RAD54B	8	94371960	94475109	-	5313	protein_coding	RAD54 homolog B [Source:HGNC Symbol;Acc:HGNC:17228]	-
ENSG00000272745	0	0	0	0	0	0	0	0	0	AC004948.1	7	7619872	7620543	+	672	lincRNA	novel transcript	-
ENSG00000248781	0	0	0	0	0	0	0	0	0	PSMC1P4	5	56275304	56276630	-	1327	processed_pseudogene	proteasome 26S subunit, ATPase 1 pseudogene 4 [Source:HGNC Symbol;Acc:HGNC:39779]	-
ENSG00000227887	0	0	0	0	0	0	0	0	0	RPS26P13	1	208697369	208697698	-	330	processed_pseudogene	ribosomal protein S26 pseudogene 13 [Source:HGNC Symbol;Acc:HGNC:35784]	-
ENSG00000244535	0	0	0	0	0	0	0	0	0	AL049714.1	11	32758268	32758614	+	347	processed_pseudogene	ribosomal protein L34 (RPL34) pseudogene	-
ENSG00000235118	0	0	0	0.200358	0.1692	0	0	0	0	FAM237A	2	206642412	206649011	+	971	protein_coding	family with sequence similarity 237 member A [Source:HGNC Symbol;Acc:HGNC:52388]	-
ENSG00000249910	0	0	0	0	0	0	0	0	0	TRIM51CP	11	48945694	48951895	+	1357	unprocessed_pseudogene	tripartite motif-containing 51C, pseudogene [Source:HGNC Symbol;Acc:HGNC:43968]	-
ENSG00000234064	0	0	0	0	0	0	0	0	0	PRAMEF29P	1	12926162	12928253	+	1139	unprocessed_pseudogene	PRAME family member 29, pseudogene [Source:HGNC Symbol;Acc:HGNC:51891]	-
ENSG00000223353	0	0	0	0	0	0	0	0	0	AL589763.1	1	245123471	245124450	-	791	processed_pseudogene	aldo-keto reductase family 1, member B1 (aldose reductase) (AKR1B1) pseudogene	-
ENSG00000231811	0	0	0.159985	0.176303	0	0	0	0	0	AL159166.1	6	4345743	4347037	-	329	lincRNA	novel transcript	-
ENSG00000122641	295.461	296.619	288.912	305.164	295.783	299.097	296.124	272.849	278.952	INHBA	7	41667168	41705834	-	8302	protein_coding	inhibin subunit beta A [Source:HGNC Symbol;Acc:HGNC:6066]	-
ENSG00000205611	0.0467085	0.0565068	0	0.0129704	0.0219067	0.0105279	0.0213458	0.0894723	0.0763566	LINC01597	20	30278906	30288479	-	4472	lincRNA	long intergenic non-protein coding RNA 1597 [Source:HGNC Symbol;Acc:HGNC:51594]	-
ENSG00000235984	0	0	0	0	0	0	0	0	0	GPC5-AS1	13	92701389	92721614	-	461	antisense	GPC5 antisense RNA 1 [Source:HGNC Symbol;Acc:HGNC:39886]	-
ENSG00000235211	0	0	0	0	0	0	0	0	0	TMSB10P2	X	18341216	18341346	+	131	processed_pseudogene	thymosin beta 10 pseudogene 2 [Source:HGNC Symbol;Acc:HGNC:41950]	-
ENSG00000242810	0	0	0	0	0	0	0	0	0	MRPL42P6	3	151475804	151476174	-	371	processed_pseudogene	mitochondrial ribosomal protein L42 pseudogene 6 [Source:HGNC Symbol;Acc:HGNC:44533]	-
ENSG00000111405	0.0604399	0	0	0.033567	0	0.0544918	0	0	0	ENDOU	12	47709734	47725567	-	2679	protein_coding	endonuclease, poly(U) specific [Source:HGNC Symbol;Acc:HGNC:14369]	-
ENSG00000101160	303.79	355.103	299.012	257.245	266.491	256.604	362.742	343.874	333.097	CTSZ	20	58995185	59007247	-	2038	protein_coding	cathepsin Z [Source:HGNC Symbol;Acc:HGNC:2547]	-
ENSG00000207119	0	0	0	0	0	0	0	0	0	RF00012	15	69457941	69458149	-	209	snoRNA		-
ENSG00000162129	6.84676	7.28381	8.29781	9.74777	11.7489	9.28391	6.63043	8.19705	8.70544	CLPB	11	72285495	72434680	-	12428	protein_coding	ClpB homolog, mitochondrial AAA ATPase chaperonin [Source:HGNC Symbol;Acc:HGNC:30664]	-
ENSG00000220598	0	0	0	0	0	0	0	0	0	SSR1P1	6	150384307	150385120	-	814	processed_pseudogene	signal sequence receptor subunit 1 pseudogene 1 [Source:HGNC Symbol;Acc:HGNC:39273]	-
ENSG00000196636	4.09883	4.173	5.09716	7.15439	6.0917	6.09509	4.96267	4.43558	6.01681	SDHAF3	7	97116590	97181763	+	2303	protein_coding	succinate dehydrogenase complex assembly factor 3 [Source:HGNC Symbol;Acc:HGNC:21752]	-
ENSG00000166199	11.3652	12.9678	13.4451	14.285	16.1033	15.3701	11.2626	13.9217	14.5281	ALKBH3	11	43880811	43920266	+	2372	protein_coding	alkB homolog 3, alpha-ketoglutaratedependent dioxygenase [Source:HGNC Symbol;Acc:HGNC:30141]	-
ENSG00000214188	0	0	0	0	0	0	0	0	0.0622206	ST7-OT4	7	116953899	117098806	+	2664	sense_intronic	ST7 overlapping transcript 4 [Source:HGNC Symbol;Acc:HGNC:18835]	-
ENSG00000240970	0.720277	0.232366	0.604999	0.933394	1.12605	0.757624	0.109722	0.114977	0.22428	RPL23AP64	11	119003012	119003446	-	435	processed_pseudogene	ribosomal protein L23a pseudogene 64 [Source:HGNC Symbol;Acc:HGNC:36552]	-
ENSG00000148218	44.8412	51.089	48.5421	43.6483	37.147	38.5387	51.1612	50.7677	51.1058	ALAD	9	113386317	113401333	-	4983	protein_coding	aminolevulinate dehydratase [Source:HGNC Symbol;Acc:HGNC:395]	-
ENSG00000265817	0.188715	0.391376	0.135867	0.209616	0.0505765	0.0486122	0.295689	0.0774626	0.20147	FSBP	8	94372170	94436952	-	3597	protein_coding	fibrinogen silencer binding protein [Source:HGNC Symbol;Acc:HGNC:43653]	-
ENSG00000277611	0	0	0	0	0	0	0	0	0	Z98752.3	20	43540171	43569498	+	566	protein_coding	novel transcript	-
ENSG00000119714	2.97685	2.66565	4.17827	3.77009	4.20155	3.53671	2.92427	4.50321	3.09267	GPR68	14	91232532	91253925	-	3278	protein_coding	G protein-coupled receptor 68 [Source:HGNC Symbol;Acc:HGNC:4519]	-
ENSG00000164080	5.10958	5.04187	5.33904	5.3147	5.4491	5.68801	4.06497	4.75023	4.81974	RAD54L2	3	51541144	51668667	+	11924	protein_coding	RAD54 like 2 [Source:HGNC Symbol;Acc:HGNC:29123]	-
ENSG00000248049	4.75766	3.64681	3.22255	2.83255	3.07038	3.91197	3.93105	4.11931	4.55099	UBA6-AS1	4	67701280	68080952	+	5575	antisense	UBA6 antisense RNA 1 (head to head) [Source:HGNC Symbol;Acc:HGNC:49083]	-
ENSG00000186352	33.3386	43.0612	31.7819	5.53735	3.85787	5.11261	35.1419	31.2743	36.382	ANKRD37	4	185396021	185400628	+	2580	protein_coding	ankyrin repeat domain 37 [Source:HGNC Symbol;Acc:HGNC:29593]	-
ENSG00000230622	0	0	0	0.211693	0	0	0	0	0	UQCRHP1	6	31611083	31611356	-	274	processed_pseudogene	ubiquinol-cytochrome c reductase hinge protein pseudogene 1 [Source:HGNC Symbol;Acc:HGNC:31341]	-
ENSG00000112033	14.1212	13.9573	15.316	18.3345	18.6984	18.2855	13.9463	12.2844	15.1684	PPARD	6	35342558	35428191	+	4457	protein_coding	peroxisome proliferator activated receptor delta [Source:HGNC Symbol;Acc:HGNC:9235]	THR-like
ENSG00000249951	0	0	0	0	0	0	0	0	0	AC108067.1	4	94675245	94702570	+	215	lincRNA	novel transcript	-
ENSG00000120341	0.0497334	0.096266	0.100257	0.220967	0.116627	0.044839	0.0681845	0.07145	0.023229	SEC16B	1	177923956	177984303	-	7377	protein_coding	SEC16 homolog B, endoplasmic reticulum export factor [Source:HGNC Symbol;Acc:HGNC:30301]	-
ENSG00000232583	0	0	0	0	0	0	0	0	0	GPR143P	Y	7100733	7106502	-	205	unprocessed_pseudogene	G protein-coupled receptor 143 pseudogene [Source:HGNC Symbol;Acc:HGNC:18499]	-
ENSG00000250219	0	0	0	0	0	0	0	0	0	LTV1P1	4	120091046	120092282	-	1237	processed_pseudogene	LTV1 ribosome biogenesis factor pseudogene 1 [Source:HGNC Symbol;Acc:HGNC:44049]	-
ENSG00000254428	0.399389	0.676439	0.503202	0.554529	0.655608	0.810188	0.0912604	0.860679	0.6529	AP003392.1	11	119003742	119004893	-	523	antisense	novel transcript, antisense to CCDC84	-
ENSG00000236839	0	0	0	0	0	0	0	0	0	AC069280.1	7	69187833	69189318	-	439	lincRNA	novel transcript	-
ENSG00000272917	0	0	0	0	0	0	0	0	0	AC010186.4	12	9642872	9657070	+	615	processed_transcript	C-type lectin domain family 2 member D pseudogene [Source:NCBI gene;Acc:374443]	-
ENSG00000164591	0.078057	0.0377725	0.196693	0.0867022	0.0366093	0	0.0713441	0.149522	0.109374	MYOZ3	5	150660874	150679365	+	6037	protein_coding	myozenin 3 [Source:HGNC Symbol;Acc:HGNC:18565]	-
ENSG00000261780	0	0	0	0	0	0	0	0	0	LINC02582	18	73324941	73349878	+	2275	processed_transcript	long intergenic non-protein coding RNA 2582 [Source:HGNC Symbol;Acc:HGNC:53792]	-
ENSG00000274316	0	0	0	0	0	0	0	0	0	ZNF646P1	13	53408882	53409876	-	995	unprocessed_pseudogene	zinc finger protein 646 pseudogene 1 [Source:HGNC Symbol;Acc:HGNC:39749]	-
ENSG00000130703	18.366	18.6255	19.8184	15.5929	16.1148	14.1421	19.9993	18.9792	19.2497	OSBPL2	20	62231922	62296213	+	13047	protein_coding	oxysterol binding protein like 2 [Source:HGNC Symbol;Acc:HGNC:15761]	-
ENSG00000006327	203.682	236.218	244.566	336.209	330.665	321.648	228.652	260.891	233.133	TNFRSF12A	16	3018445	3022383	+	1848	protein_coding	TNF receptor superfamily member 12A [Source:HGNC Symbol;Acc:HGNC:18152]	-
ENSG00000272663	0.0940903	0.182125	0.379351	0.209023	0.264775	0.0848305	0.257996	0.63082	0.175787	AC093635.1	2	48440043	48440597	-	555	lincRNA	novel transcript	-
ENSG00000105258	5.12735	6.71826	6.44022	6.39619	8.73116	8.24983	5.98417	4.98639	5.23179	POLR2I	19	36113710	36115346	-	1269	protein_coding	RNA polymerase II subunit I [Source:HGNC Symbol;Acc:HGNC:9196]	-
ENSG00000128714	0	0.0225623	0	0	0.0218675	0.0210183	0.0213077	0	0	HOXD13	2	176092891	176095938	+	2240	protein_coding	homeobox D13 [Source:HGNC Symbol;Acc:HGNC:5136]	Homeobox
ENSG00000279581	0	0	0	0	0	0	0	0	0	AC073862.2	12	130980667	130981367	-	701	TEC	novel transcript	-
ENSG00000237802	0	0	0	0	0	0	0	0	0	FAM197Y6	Y	9388122	9397438	-	3054	transcribed_unprocessed_pseudogene	family with sequence similarity 197 Y-linked member 6 [Source:HGNC Symbol;Acc:HGNC:37468]	-
ENSG00000250583	0.227787	0	0	0	0	0	0	0.054542	0.106392	AC034232.2	5	33519616	33522230	-	917	lincRNA	novel transcript	-
ENSG00000212623	0	0	0	0	0	0	0	0	0	RNU6-493P	X	80900757	80900864	+	108	snRNA	RNA, U6 small nuclear 493, pseudogene [Source:HGNC Symbol;Acc:HGNC:47456]	-
ENSG00000267011	0.549685	0.132999	1.1081	0.152641	0	0.371692	0.251206	0	0.641855	AC011498.1	19	4457962	4471493	-	837	lincRNA	novel transcript	-
ENSG00000275945	0	0	0	0	0	0	0	0	0	EIF3FP1	21	10330732	10331537	+	806	processed_pseudogene	eukaryotic translation initiation factor 3 subunit F pseudogene 1 [Source:HGNC Symbol;Acc:HGNC:3276]	-
ENSG00000230568	0.0353555	0.0684355	0.213818	0.0392713	0.132656	0.15938	0.0646299	0.101588	0.0990811	SF3A3P1	20	3489529	3491005	-	1477	processed_pseudogene	splicing factor 3a, subunit 3 pseudogene 1 [Source:HGNC Symbol;Acc:HGNC:16576]	-
ENSG00000250722	0	0.0827163	0.129218	0.0474663	0.120254	0	0.0390583	0.0818576	0	SELENOP	5	42799880	42887392	-	5688	protein_coding	selenoprotein P [Source:HGNC Symbol;Acc:HGNC:10751]	-
ENSG00000272211	0.151729	0	0.0764672	0.084267	0	0.182396	0.0231134	0.145322	0.0708682	AC114760.2	2	196151263	196154881	+	2065	antisense	novel transcript, antisense to STK17B	-
ENSG00000253600	0	0	0	0	0	0	0	0	0	AC008446.1	5	164601002	164601452	-	451	processed_pseudogene	ribosomal protein S15 (RPS15) pseudogene	-
ENSG00000200610	0	0	0	0	0	0	0	0	0	RF00019	3	106515897	106515998	+	102	misc_RNA		-
ENSG00000233456	0	0	0	0	0	0	0	0	0	LINC01077	13	48570639	48573317	-	413	lincRNA	long intergenic non-protein coding RNA 1077 [Source:HGNC Symbol;Acc:HGNC:49120]	-
ENSG00000196990	0	0	0	0	0.0504462	0	0	0	0	FAM163B	9	133578415	133586197	-	1353	protein_coding	family with sequence similarity 163 member B [Source:HGNC Symbol;Acc:HGNC:33277]	-
ENSG00000260534	0	0	0	0	0	0	0	0	0	AC100827.3	15	72589691	72591845	+	2155	sense_overlapping	novel transcript	-
ENSG00000284755	0	0	0	0	0	0	0	0	0	AL049557.1	1	111722064	111755824	-	5865	protein_coding	inka box actin regulator 2 [Source:NCBI gene;Acc:55924]	-
ENSG00000075884	0	0	0	0	0	0	0	0	0	ARHGAP15	2	143091362	143768352	+	6226	protein_coding	Rho GTPase activating protein 15 [Source:HGNC Symbol;Acc:HGNC:21030]	-
ENSG00000200942	0	1.01079	0	0	0	0	0	0.50015	0	RNU6-501P	1	201733406	201733505	+	100	snRNA	RNA, U6 small nuclear 501, pseudogene [Source:HGNC Symbol;Acc:HGNC:47464]	-
ENSG00000254670	0	0	0	0	0	0	0	0	0	AC084859.1	11	13001090	13009159	-	670	lincRNA	novel transcript	-
ENSG00000235154	0	0	0	0	0	0	0	0	0	FP325330.1	22	48044710	48048549	-	372	lincRNA	novel transcript	-
ENSG00000258397	0	0	0	0	0	0	0	0	0	BCAR1P1	15	20073699	20074334	-	636	processed_pseudogene	breast cancer anti-estrogen resistance 1 pseudogene 1 [Source:HGNC Symbol;Acc:HGNC:51325]	-
ENSG00000253115	0	0	0	0	0	0	0	0	0	AC087672.1	8	74103516	74106744	+	429	lincRNA	novel transcript	-
ENSG00000202190	0	0	0	0	0	0	0	0	0	RF00019	10	60081741	60081854	+	114	misc_RNA		-
ENSG00000265102	0	0	0	0	0	0	0	0	0	MIR3942	15	35372256	35372364	-	109	miRNA	microRNA 3942 [Source:HGNC Symbol;Acc:HGNC:38976]	-
ENSG00000258230	0.834568	0.346162	0.240342	0	0.223668	0	0	0.228379	0	AC063950.1	12	101773114	101773755	-	642	transcribed_processed_pseudogene	suppression of tumorigenicity 13 (colon carcinoma) (Hsp70 interacting protein) (ST13) pseudogene	-
ENSG00000260954	0.129258	0	0.260569	0.287147	0	0	0	0	0	AL133297.1	16	1579242	1580308	-	404	sense_intronic	novel transcript, intronic to IFT140	-
ENSG00000239365	0	0	0	0	0	0	0.142902	0	0	RPS26P49	14	104830838	104831171	-	334	processed_pseudogene	ribosomal protein S26 pseudogene 49 [Source:HGNC Symbol;Acc:HGNC:35514]	-
ENSG00000283696	0	0.0506917	0	0	0	0.0944452	0	0.0501655	0	AL592295.4	1	161399409	161422424	+	997	lincRNA	novel transcript	-
ENSG00000242580	0	0	0	0	0	0	0	0	0	IGKV1D-43	2	90209873	90210529	+	532	IG_V_gene	immunoglobulin kappa variable 1D-43 [Source:HGNC Symbol;Acc:HGNC:5758]	-
ENSG00000139567	2.19916	2.59277	2.90177	1.68771	1.31272	1.83854	1.86385	2.45096	2.5399	ACVRL1	12	51906908	51923361	+	5040	protein_coding	activin A receptor like type 1 [Source:HGNC Symbol;Acc:HGNC:175]	-
ENSG00000200432	0	0	0	0	0	0	0	0	0	RF00019	2	128067800	128067901	+	102	misc_RNA		-
ENSG00000125637	0.673325	0.778368	1.07457	1.30882	1.17546	1.02863	0.803464	0.806116	0.524151	PSD4	2	113157325	113209396	+	13442	protein_coding	pleckstrin and Sec7 domain containing 4 [Source:HGNC Symbol;Acc:HGNC:19096]	-
ENSG00000214783	0.112301	0.0407578	0.084895	0.0311848	0.0395027	0.101249	0.0769826	0.0403347	0.0524526	POLR2J4	7	43940895	44019175	-	6492	processed_transcript	RNA polymerase II subunit J4, pseudogene [Source:HGNC Symbol;Acc:HGNC:28195]	-
ENSG00000284659	0	0	0	0	0	0	0	0	0	AC073869.8	2	131419665	131419784	-	120	processed_pseudogene	secreted frizzled related protein 4 (SFRP4) pseudogene	-
ENSG00000233071	0	0	0	0	0	0	0	0	0	RPSAP59	X	103206010	103206899	-	890	processed_pseudogene	ribosomal protein SA pseudogene 59 [Source:HGNC Symbol;Acc:HGNC:36957]	-
ENSG00000181227	0.154269	0.0373262	0.155495	0.471227	0.325591	0.104315	0.070501	0.0738774	0.108082	DLSTP1	1	75743423	75744776	-	1354	processed_pseudogene	dihydrolipoamide S-succinyltransferase pseudogene 1 [Source:HGNC Symbol;Acc:HGNC:2912]	-
ENSG00000094880	32.597	32.0189	34.1637	32.9048	34.2782	33.9704	32.1653	31.117	32.7731	CDC23	5	138187648	138213343	-	4618	protein_coding	cell division cycle 23 [Source:HGNC Symbol;Acc:HGNC:1724]	-
ENSG00000240342	455.129	471.933	441.678	499.268	495.406	492.77	482.559	542.996	536.757	RPS2P5	12	118246084	118246962	+	879	processed_pseudogene	ribosomal protein S2 pseudogene 5 [Source:HGNC Symbol;Acc:HGNC:31386]	-
ENSG00000162641	0.0259672	0	0.0261735	0.144216	0.0487154	0.0468234	0.0237341	0	0.0242571	AKNAD1	1	108815898	108858228	-	4915	protein_coding	AKNA domain containing 1 [Source:HGNC Symbol;Acc:HGNC:28398]	-
ENSG00000163050	2.86798	3.68611	2.59012	2.77786	2.17369	2.10995	2.62133	3.31822	3.92219	COQ8A	1	226897536	226987545	+	7797	protein_coding	coenzyme Q8A [Source:HGNC Symbol;Acc:HGNC:16812]	-
ENSG00000062524	0.0219967	0	0.0443428	0.219896	0.226966	0.138823	0	0.0210678	0.020548	LTK	15	41503638	41513887	-	3490	protein_coding	leukocyte receptor tyrosine kinase [Source:HGNC Symbol;Acc:HGNC:6721]	-
ENSG00000280739	0.527476	0.765752	0.443055	0.0976494	0.371086	0.515196	0.241056	0.505202	0.739105	EIF1B-AS1	3	40173145	40309698	-	5433	processed_transcript	EIF1B antisense RNA 1 [Source:HGNC Symbol;Acc:HGNC:44555]	-
ENSG00000146267	0.718008	0.810719	0.84433	0.830761	0.687534	0.809183	0.451178	0.372498	0.642774	FAXC	6	99271169	99350062	-	11662	protein_coding	failed axon connections homolog [Source:HGNC Symbol;Acc:HGNC:20742]	-
ENSG00000136044	21.9281	22.3968	30.4016	40.5304	42.0728	37.5866	23.7656	25.0698	24.6941	APPL2	12	105173296	105236238	-	5124	protein_coding	adaptor protein, phosphotyrosine interacting with PH domain and leucine zipper 2 [Source:HGNC Symbol;Acc:HGNC:18242]	-
ENSG00000230630	3.12791	3.48903	3.25962	3.651	3.87888	3.87163	4.50641	2.99582	4.25905	DNM3OS	1	172138397	172144840	-	3195	antisense	DNM3 opposite strand/antisense RNA [Source:HGNC Symbol;Acc:HGNC:41228]	-
ENSG00000232803	0	0	0	0	0	0	0	0	0	SLCO4A1-AS1	20	62663019	62666724	-	1534	antisense	SLCO4A1 antisense RNA 1 [Source:HGNC Symbol;Acc:HGNC:40537]	-
ENSG00000188177	1.22057	1.09869	0.911949	0.843795	0.960771	0.769548	1.0766	0.882906	0.980722	ZC3H6	2	112275594	112340063	+	11803	protein_coding	zinc finger CCCH-type containing 6 [Source:HGNC Symbol;Acc:HGNC:24762]	-
ENSG00000258698	0	0	0	0	0	0	0	0	0	AL139317.1	14	52792875	52820034	-	196	lincRNA	novel transcript	-
ENSG00000182255	0	0	0	0	0	0	0	0	0	KCNA4	11	30009741	30017023	-	4195	protein_coding	potassium voltage-gated channel subfamily A member 4 [Source:HGNC Symbol;Acc:HGNC:6222]	-
ENSG00000283527	0	0	0	0	0	0	0	0	0	RF00026	20	35769785	35769867	-	83	snRNA		-
ENSG00000158825	3.14652	2.10826	1.9517	4.16713	4.48399	3.00052	2.54408	2.55001	1.92184	CDA	1	20588948	20618908	+	963	protein_coding	cytidine deaminase [Source:HGNC Symbol;Acc:HGNC:1712]	-
ENSG00000211925	0	0	0	0	0	0	0	0	0	IGHD2-8	14	105907211	105907241	-	31	IG_D_gene	immunoglobulin heavy diversity 2-8 [Source:HGNC Symbol;Acc:HGNC:5492]	-
ENSG00000225616	0	0	0	0	0	0	0	0	0	AL138785.1	1	28982278	28982608	-	331	processed_pseudogene	ribosomal protein L27 (RPL27) pseudogene	-
ENSG00000234726	0	0	0	0	0	0	0	0	0	AC245060.3	22	22228719	22230469	-	1242	processed_pseudogene	chromosome 19 open reading frame 2 (C19orf2) pseudogene	-
ENSG00000250200	0	0	0	0	0	0	0	0	0	AC105914.1	4	174923813	174924038	-	226	processed_pseudogene	GC-rich promoter binding protein 1-like 1 (GPBP1L1) pseudogene	-
ENSG00000236343	0	0	0	0	0	0	0	0	0	EI24P4	7	145005058	145006135	+	1078	processed_pseudogene	EI24, autophagy associated transmembrane protein pseudogene 4 [Source:HGNC Symbol;Acc:HGNC:44589]	-
ENSG00000280134	0	0	0	0	0	0	0	0	0	AL731532.2	10	85555484	85557436	-	1953	TEC	TEC	-
ENSG00000147677	132.124	130.919	142.366	130.714	135.225	130.391	141.241	153.636	152.83	EIF3H	8	116642130	116766925	-	6434	protein_coding	eukaryotic translation initiation factor 3 subunit H [Source:HGNC Symbol;Acc:HGNC:3273]	-
ENSG00000235526	0.102795	0	0.207224	0	0	0.092679	0	0.0984547	0.192051	AL355990.2	1	110177643	110178719	-	508	antisense	novel transcript	-
ENSG00000269899	7.89884	11.2546	7.51927	6.33655	7.40924	6.72585	6.21683	8.40588	6.14886	AC025857.2	8	11846154	11846391	-	238	sense_intronic	novel transcript, sense intronic to CTSB	-
ENSG00000231482	0	0	0	0	0	0	0	0	0	AC105450.1	2	1366234	1580747	-	2569	lincRNA	novel transcript	-
ENSG00000250503	0	0	0	0	0	0	0	0	0	AC093831.1	4	130881027	130885641	-	434	lincRNA	novel transcript	-
ENSG00000203527	0	0	0	0	0	0	0	0	0	Z99756.1	22	43275955	43283830	+	1951	antisense	uncharacterized LOC101927447 [Source:NCBI gene;Acc:101927447]	-
ENSG00000183911	0.113031	0.109393	0.455714	0	0.530122	0.203814	0	0.108258	0.105586	RPL21P132	X	101339917	101340934	+	462	processed_pseudogene	ribosomal protein L21 pseudogene 132 [Source:HGNC Symbol;Acc:HGNC:35865]	-
ENSG00000225267	0	0	0	0	0	0	0	0	0	RPL8P2	21	30263380	30263881	-	502	processed_pseudogene	ribosomal protein L8 pseudogene 2 [Source:HGNC Symbol;Acc:HGNC:17220]	-
ENSG00000280017	0	0	0	0	0	0	0	0	0	AC112200.2	5	10541454	10543192	+	1739	TEC	TEC	-
ENSG00000185875	0.935494	0.945929	1.08366	1.5509	1.75502	1.66168	0.752947	1.3373	0.978228	THNSL1	10	25016658	25026664	+	3788	protein_coding	threonine synthase like 1 [Source:HGNC Symbol;Acc:HGNC:26160]	-
ENSG00000262410	0	0.0787222	0.0819859	0.0903485	0.228894	0.0733348	0.0743445	0.077905	0.151966	AC024361.1	17	82745068	82745709	+	642	sense_intronic	novel transcript, sense intronic FN3K	-
ENSG00000113163	22.9215	19.8549	20.8801	20.0251	18.6979	19.7436	19.3006	20.3402	18.5458	COL4A3BP	5	75356345	75512138	-	18138	protein_coding	collagen type IV alpha 3 binding protein [Source:HGNC Symbol;Acc:HGNC:2205]	-
ENSG00000161133	0.186057	0.0600233	0.0625118	0	0	0	0	0	0.0579346	USP41	22	20350578	20390758	-	1592	protein_coding	ubiquitin specific peptidase 41 [Source:HGNC Symbol;Acc:HGNC:20070]	-
ENSG00000260715	0	0	0	0	0	0	0	0	0	AC093536.2	16	64155169	64156574	+	1406	lincRNA	novel transcript	-
ENSG00000248418	0	0	0	0	0	0	0	0	0	UBL5P1	5	29600676	29600868	+	193	processed_pseudogene	ubiquitin like 5 pseudogene 1 [Source:HGNC Symbol;Acc:HGNC:44639]	-
ENSG00000273819	0	0	0	0	0	0	0	0	0	ENPP7P7	11	67812557	67873367	-	1102	unprocessed_pseudogene	ectonucleotide pyrophosphatase/phosphodiesterase 7 pseudogene 7 [Source:HGNC Symbol;Acc:HGNC:48690]	-
ENSG00000198106	0	0.0104898	0.0109246	0	0	0	0.0198129	0	0	SNX29P2	16	29291220	29372110	+	4818	processed_transcript	sorting nexin 29 pseudogene 2 [Source:NCBI gene;Acc:440352]	-
ENSG00000200138	0	0	0	0	0	0	0	0	0	RNY1P10	16	28183318	28183430	+	113	misc_RNA	RNA, Ro-associated Y1 pseudogene 10 [Source:HGNC Symbol;Acc:HGNC:50873]	-
ENSG00000175143	0	0	0	0	0	0	0	0	0	OR2T1	1	248403048	248408020	+	2224	protein_coding	olfactory receptor family 2 subfamily T member 1 [Source:HGNC Symbol;Acc:HGNC:8277]	-
ENSG00000226616	0	0	0	0	0	0	0	0	0	OR52M2P	11	4514966	4515924	-	959	unprocessed_pseudogene	olfactory receptor family 52 subfamily M member 2 pseudogene [Source:HGNC Symbol;Acc:HGNC:15226]	-
ENSG00000278138	0	0	0	0	0	0	0	0	0	CLUHP11	16	35068211	35085060	+	1026	unprocessed_pseudogene	clustered mitochondria homolog pseudogene 11 [Source:HGNC Symbol;Acc:HGNC:51806]	-
ENSG00000258424	0.174067	0.168465	0.701799	0.193346	0.163278	0.627746	0.318195	0	0	AL512791.1	14	90402523	90405235	-	300	antisense	novel transcript, antisense to CALM1	-
ENSG00000201231	0	0	0	0	0	0	0	0	0	RNU4-50P	8	58814412	58814552	-	141	snRNA	RNA, U4 small nuclear 50, pseudogene [Source:HGNC Symbol;Acc:HGNC:46986]	-
ENSG00000223675	0	0	0	0	0	0	0	0	0	AC093117.1	1	94585556	94592297	-	2171	lincRNA	novel transcript	-
ENSG00000163263	0	0.130593	0	0	0.126572	0	0	0.258475	0	C1orf189	1	154199372	154206333	-	387	protein_coding	chromosome 1 open reading frame 189 [Source:HGNC Symbol;Acc:HGNC:32305]	-
ENSG00000265683	0.0718296	0	0.0724002	0	0	0	0	0	0	SYPL1P2	17	27351858	27352584	-	727	processed_pseudogene	synaptophysin like 1 pseudogene 2 [Source:HGNC Symbol;Acc:HGNC:53547]	-
ENSG00000226003	0	0	0	0	0	0	0	0	0	PPIAP37	1	160848010	160848502	+	493	processed_pseudogene	peptidylprolyl isomerase A pseudogene 37 [Source:HGNC Symbol;Acc:HGNC:53661]	-
ENSG00000207221	0	0	0	0	0	0	0	0	0	SNORA70E	11	83041464	83041598	-	135	snoRNA	small nucleolar RNA, H/ACA box 70E [Source:HGNC Symbol;Acc:HGNC:34357]	-
ENSG00000227847	0	0	0	0	0	0	0	0	0	AC010099.2	7	125345825	125346197	+	373	processed_pseudogene	peptidylprolyl isomerase A (cyclophilin A) (PPIA) pseudogene	-
ENSG00000249986	0.343553	0.498746	0.519424	0.572406	0.644517	0.619486	0.157004	0.329046	0.320927	YWHAQP6	3	141600276	141600579	-	304	processed_pseudogene	YWHAQ pseudogene 6 [Source:HGNC Symbol;Acc:HGNC:37685]	-
ENSG00000267177	0	0	0	0	0	0	0	0	0	AP002505.1	18	13234945	13236470	-	228	antisense	novel transcript, antisense C18orf1	-
ENSG00000270336	0	0	0	0	0	0	0	0	0	AC105148.1	4	167741879	167742287	-	409	processed_pseudogene	protein phosphatase 2, catalytic subunit, beta isozyme (PPP2CB) pseudogene	-
ENSG00000276449	0.172862	0.0760452	0.0791979	0.069821	0.0737034	0.070841	0.114906	0.0602046	0.0880787	AC004076.2	19	57449689	57453011	+	3323	antisense	novel transcript	-
ENSG00000268560	0	0	0	0	0	0	0	0	0	AC010636.1	19	20611559	20615389	+	628	lincRNA	novel transcript	-
ENSG00000272359	0	0	0	0.872237	0	0	0	0	0.366774	RNU4-89P	3	196747192	196747324	-	133	snRNA	RNA, U4 small nuclear 89, pseudogene [Source:HGNC Symbol;Acc:HGNC:47025]	-
ENSG00000259646	0	0	0	0	0	0	0	0	0	AC140725.2	15	101903154	101903204	+	51	unprocessed_pseudogene	olfactory receptor pseudogene	-
ENSG00000231422	0	0	0	0	0	0	0	0	0	LINC01516	10	25113058	25161236	+	2992	lincRNA	long intergenic non-protein coding RNA 1516 [Source:HGNC Symbol;Acc:HGNC:51211]	-
ENSG00000206654	0	0	0	0	0	0	0	0	0	RNU6-608P	1	39120940	39121043	-	104	snRNA	RNA, U6 small nuclear 608, pseudogene [Source:HGNC Symbol;Acc:HGNC:47571]	-
ENSG00000201616	0	0	0	0	0.300511	0	0	0	1.19708	RNU1-91P	11	3048359	3048521	-	163	snRNA	RNA, U1 small nuclear 91, pseudogene [Source:HGNC Symbol;Acc:HGNC:48433]	-
ENSG00000249755	0	0.15385	0	0.0882858	0.298224	0.429963	0.0726472	0.0761263	0.222744	AC083829.1	4	88527160	88528170	+	657	processed_pseudogene	CD53 molecule (CD53) pseudogene	-
ENSG00000284691	2.67521	2.27843	2.69646	2.19891	2.0577	1.83307	3.3743	2.25477	2.34908	AC073111.5	7	150400702	150412470	+	4333	protein_coding	novel zinc finger protein	-
ENSG00000220267	0	0	0	0	0	0	0	0	0	ACTBP8	6	88275882	88276989	-	1108	processed_pseudogene	actin, beta pseudogene 8 [Source:HGNC Symbol;Acc:HGNC:141]	-
ENSG00000163803	0.149129	0.120275	0.150314	0.441723	0.3264	0.246497	0.159022	0.0952213	0.139308	PLB1	2	28457145	28643788	+	8238	protein_coding	phospholipase B1 [Source:HGNC Symbol;Acc:HGNC:30041]	-
ENSG00000241347	0	0	0	0	0	0	0	0	0	RN7SL466P	1	161735808	161736102	+	295	misc_RNA	RNA, 7SL, cytoplasmic 466, pseudogene [Source:HGNC Symbol;Acc:HGNC:46482]	-
ENSG00000182257	0.22441	0.325782	0.29405	0.324043	0.23155	0.24279	0.0615331	0.236427	0.293482	PRR34	22	46049478	46054144	-	2817	protein_coding	proline rich 34 [Source:HGNC Symbol;Acc:HGNC:25606]	-
ENSG00000153495	0.338213	0.523727	0.20454	1.20215	1.3959	0.670842	0.618254	0.129573	0.252751	TEX29	13	111316184	111344249	+	930	protein_coding	testis expressed 29 [Source:HGNC Symbol;Acc:HGNC:20370]	-
ENSG00000234880	0	0.0471232	0	0	0	0.0438983	0	0	0	LINC00163	21	44989864	44994086	-	2155	lincRNA	long intergenic non-protein coding RNA 163 [Source:HGNC Symbol;Acc:HGNC:33165]	-
ENSG00000140090	0	0	0	0	0	0	0	0.0120634	0	SLC24A4	14	92322581	92501483	+	14412	protein_coding	solute carrier family 24 member 4 [Source:HGNC Symbol;Acc:HGNC:10978]	-
ENSG00000251923	0	0	0	0	0	0	0	0	0	RNU6-276P	4	55798636	55798731	+	96	snRNA	RNA, U6 small nuclear 276, pseudogene [Source:HGNC Symbol;Acc:HGNC:47239]	-
ENSG00000160072	7.39232	6.75085	8.69288	14.7589	14.7039	16.457	6.30614	8.82297	7.15336	ATAD3B	1	1471769	1497848	+	7682	protein_coding	ATPase family, AAA domain containing 3B [Source:HGNC Symbol;Acc:HGNC:24007]	-
ENSG00000213376	0	0	0	0	0	0	0	0	0	GAPDHP71	5	174513305	174514307	+	1003	processed_pseudogene	glyceraldehyde-3-phosphate dehydrogenase pseudogene 71 [Source:HGNC Symbol;Acc:HGNC:4149]	-
ENSG00000258583	0.0548531	0	0.0552888	0	0	0	0	0.0525368	0	LINC01500	14	58646631	59017532	+	2430	lincRNA	long intergenic non-protein coding RNA 1500 [Source:HGNC Symbol;Acc:HGNC:51166]	-
ENSG00000105053	19.6191	19.1493	17.2084	18.3145	17.7765	20.5485	18.1989	21.5492	21.0565	VRK3	19	49976467	50025946	-	9796	protein_coding	vaccinia related kinase 3 [Source:HGNC Symbol;Acc:HGNC:18996]	-
ENSG00000267771	0	0	0	0	0	0	0	0	0	AC011447.4	19	20206844	20206954	-	111	unprocessed_pseudogene	zinc finger protein (ZNF) pseudogene	-
ENSG00000138439	1.66286	1.73314	2.12731	1.17215	1.4398	1.10999	2.38207	1.76109	1.95661	FAM117B	2	202635188	202769757	+	5986	protein_coding	family with sequence similarity 117 member B [Source:HGNC Symbol;Acc:HGNC:14440]	-
ENSG00000198929	0.421903	0.241284	0.309276	0.106507	0.161899	0.0345802	0.455732	0.183676	0.358288	NOS1AP	1	162069774	162370475	+	7771	protein_coding	nitric oxide synthase 1 adaptor protein [Source:HGNC Symbol;Acc:HGNC:16859]	-
ENSG00000261888	4.6597	3.84375	2.51681	0.895389	1.12499	1.02812	4.31288	3.23892	4.00386	AC144831.1	17	83104255	83106910	+	2656	lincRNA	novel transcript	-
ENSG00000227518	0.071461	0.0172903	0.0360143	0.0198439	0.100547	0.0805353	0.0163288	0	0	AL928970.1	9	27657	30891	+	2923	antisense	novel transcript	-
ENSG00000271654	0	0	0	0	0	0	0	0	0	AC025062.2	8	18387108	18387777	-	670	processed_pseudogene	SURF6 (surfeit 6) pseudogene	-
ENSG00000284252	0	0	0	0	0	0	0	0	0	MIR4444-1	2	177212726	177212799	+	74	miRNA	microRNA 4444-1 [Source:HGNC Symbol;Acc:HGNC:41710]	-
ENSG00000278404	0	0	0	0	0	0	0	0	0	RF01874	22	26657521	26657655	+	135	misc_RNA		-
ENSG00000277287	0.818526	0.569661	0.676708	0.234957	0.353701	0.232171	0.680885	0.766345	0.532656	AL109976.1	20	3239705	3245382	+	5678	lincRNA	novel transcript	-
ENSG00000075073	0.226429	0.410891	0.313813	0.628767	0.451337	0.484844	0.129347	0.704818	0.55523	TACR2	10	69403903	69416867	-	2871	protein_coding	tachykinin receptor 2 [Source:HGNC Symbol;Acc:HGNC:11527]	-
ENSG00000183506	4.21209	3.57592	2.63175	3.14643	2.51848	3.55328	2.83673	3.2321	2.16293	PI4KAP2	22	21473000	21517533	-	7474	transcribed_unitary_pseudogene	phosphatidylinositol 4-kinase alpha pseudogene 2 [Source:HGNC Symbol;Acc:HGNC:33577]	-
ENSG00000273313	0.203191	0	0	0	0	0	0	0	0	RBAKDN	7	5072125	5073223	+	514	lincRNA	RBAK downstream neighbor [Source:HGNC Symbol;Acc:HGNC:33770]	-
ENSG00000170688	0.22533	0.109039	0	0	0	0	0.0514878	0	0	OR5E1P	11	7848700	7849626	+	927	unprocessed_pseudogene	olfactory receptor family 5 subfamily E member 1 pseudogene [Source:HGNC Symbol;Acc:HGNC:8342]	-
ENSG00000212569	0	0	0	0	0	0	0	0	0	RF00019	22	50669804	50669901	+	98	misc_RNA		-
ENSG00000197054	0.62379	0.301858	0.404193	0.197965	0.668714	0.5624	0.244347	0.213375	0.291354	ZNF763	19	11965037	11980381	+	2845	protein_coding	zinc finger protein 763 [Source:HGNC Symbol;Acc:HGNC:27614]	zf-C2H2
ENSG00000162946	1.91028	1.42862	1.73291	1.42743	1.46608	1.39348	1.07934	1.09777	0.957125	DISC1	1	231626815	232041272	+	12906	protein_coding	DISC1 scaffold protein [Source:HGNC Symbol;Acc:HGNC:2888]	-
ENSG00000213753	26.8128	33.2222	28.6059	35.0665	32.7569	29.8277	29.8925	34.3788	28.9353	CENPBD1P1	19	58573503	58599801	+	4969	transcribed_processed_pseudogene	CENPB DNA-binding domains containing 1 pseudogene 1 [Source:HGNC Symbol;Acc:HGNC:28421]	-
ENSG00000238405	0.900347	1.74275	0.453749	0	0.42227	0.40587	0	0.862327	0	RNA5SP311	10	46807458	46807573	-	116	rRNA_pseudogene	RNA, 5S ribosomal pseudogene 311 [Source:HGNC Symbol;Acc:HGNC:43211]	-
ENSG00000244113	0	0.171904	0	0	0	0	0.0811721	0.0850595	0	AC079193.1	8	17150301	17150888	-	588	processed_pseudogene	ribosomal protein L9 (RPL9) pseudogene	-
ENSG00000121104	8.2209	7.62017	8.28621	5.98043	5.48483	5.53279	8.5722	8.20645	7.73356	FAM117A	17	49710332	49789180	-	3836	protein_coding	family with sequence similarity 117 member A [Source:HGNC Symbol;Acc:HGNC:24179]	-
ENSG00000111231	17.3059	17.2174	16.8334	23.2553	24.3497	22.9676	17.3661	19.4149	15.7139	GPN3	12	110452484	110469268	-	2595	protein_coding	GPN-loop GTPase 3 [Source:HGNC Symbol;Acc:HGNC:30186]	-
ENSG00000277794	0	0	0	0	0	0	0	0	0	RF00017	13	40730981	40731253	+	273	misc_RNA		-
ENSG00000140382	17.8154	16.8233	18.3568	13.2992	13.6666	13.5585	17.1733	16.0269	17.8212	HMG20A	15	77420412	77485607	+	6403	protein_coding	high mobility group 20A [Source:HGNC Symbol;Acc:HGNC:5001]	HMG
ENSG00000239689	0	0	0	0	0	0	0	0	0	RPL17P46	18	50823577	50824120	+	544	processed_pseudogene	ribosomal protein L17 pseudogene 46 [Source:HGNC Symbol;Acc:HGNC:36202]	-
ENSG00000131059	0	0	0	0	0	0	0	0	0	BPIFA3	20	33217310	33227758	+	2481	protein_coding	BPI fold containing family A member 3 [Source:HGNC Symbol;Acc:HGNC:16204]	-
ENSG00000136048	257.324	287.994	222.058	114.904	97.0811	114.992	277.565	260.497	257.086	DRAM1	12	101877351	102012130	+	4180	protein_coding	DNA damage regulated autophagy modulator 1 [Source:HGNC Symbol;Acc:HGNC:25645]	-
ENSG00000232614	0	0	0	0	0	0	0	0	0	USP9YP9	Y	25730011	25735160	-	715	unprocessed_pseudogene	USP9Y pseudogene 9 [Source:HGNC Symbol;Acc:HGNC:38435]	-
ENSG00000171033	3.59889	3.76359	3.70051	5.49989	6.52506	5.5748	4.45943	3.26185	3.54237	PKIA	8	78516139	78605267	+	4216	protein_coding	cAMP-dependent protein kinase inhibitor alpha [Source:HGNC Symbol;Acc:HGNC:9017]	-
ENSG00000148291	14.5293	14.8889	14.1279	20.0308	19.8819	18.7245	13.9047	16.1259	13.8918	SURF2	9	133356552	133361169	+	1008	protein_coding	surfeit 2 [Source:HGNC Symbol;Acc:HGNC:11475]	-
ENSG00000254753	0	0	0	0	0	0	0	0	0	AC022690.2	8	13844101	13849109	-	589	lincRNA	novel transcript	-
ENSG00000070214	9.96685	8.81645	9.50468	8.17972	9.28125	9.28396	9.44011	8.51719	9.11748	SLC44A1	9	105244622	105439171	+	12172	protein_coding	solute carrier family 44 member 1 [Source:HGNC Symbol;Acc:HGNC:18798]	-
ENSG00000273584	0	0	0	0	0.177476	0	0.0864659	0	0	AC096708.3	18	68908048	68908599	+	552	sense_intronic	novel transcript, sense intronic to CCDC102B	-
ENSG00000278546	0	0.571715	0.476334	1.04984	1.10822	1.91732	0.755892	0.226312	1.21401	AC003101.2	17	31560132	31560573	+	442	lincRNA	novel transcript	-
ENSG00000237963	0	0	0	0	0	0	0	0	0	AL441964.1	X	65356890	65357547	-	658	processed_pseudogene	novel pseudogene	-
ENSG00000269139	0	0.223133	0.116192	0	0	0	0.105362	0	0.107684	AC010336.5	19	7926001	7926810	+	714	processed_transcript	novel transcript, antisense to CTXN1 and TIMM44	-
ENSG00000253948	1.23679	2.92598	1.80067	3.35811	2.06245	2.10625	1.50724	1.97428	2.18231	AC104986.2	8	98996763	99013044	-	380	lincRNA	uncharacterized LOC105375666 [Source:NCBI gene;Acc:105375666]	-
ENSG00000105707	0	0	0	0	0	0.0329007	0	0	0	HPN	19	35040506	35066571	+	3380	protein_coding	hepsin [Source:HGNC Symbol;Acc:HGNC:5155]	-
ENSG00000238713	0	0	0.465796	0	0	0.416646	0	0	0	RF00019	4	145149537	145149649	-	113	misc_RNA		-
ENSG00000276366	0	0	0	0	0	0	0	0	0	RF00012	2	240289216	240289443	+	228	snoRNA		-
ENSG00000272426	0	0	0.120171	0	0	0	0.108971	0.456758	0	BX284668.6	1	16904339	16904776	-	438	lincRNA	novel transcript	-
ENSG00000285590	0	0	0	0	0	0	0	0	0	AC010291.1	5	163597352	163612516	-	545	lincRNA		-
ENSG00000284356	0	0	0	0	0	0	0	0	0	TAF11L10	5	17597232	17597828	-	597	protein_coding	TATA-box binding protein associated factor 11 like 10 [Source:HGNC Symbol;Acc:HGNC:53853]	-
ENSG00000159885	2.06715	1.95299	1.98435	2.51477	2.26219	2.3962	2.69911	1.64988	2.48272	ZNF222	19	44025342	44033112	+	2003	protein_coding	zinc finger protein 222 [Source:HGNC Symbol;Acc:HGNC:13015]	zf-C2H2
ENSG00000095139	112.37	106.395	120.865	126.727	126.758	131.809	105.411	103.976	115.34	ARCN1	11	118572390	118603033	+	4177	protein_coding	archain 1 [Source:HGNC Symbol;Acc:HGNC:649]	-
ENSG00000163093	3.43778	4.17956	3.80873	7.35303	7.00904	6.14768	4.23278	4.19059	4.2199	BBS5	2	169479178	169506655	+	4556	protein_coding	Bardet-Biedl syndrome 5 [Source:HGNC Symbol;Acc:HGNC:970]	-
ENSG00000259544	0	0	0	0	0	0	0	0	0	AC021739.4	15	85726115	85727227	-	569	antisense	novel transcript, antisense to AKAP13	-
ENSG00000277397	0	0	0	0	0	0	0	0	0	AL606760.4	1	53180921	53186900	+	718	unprocessed_pseudogene	carnitine palmitoyltransferase 2 (CPT2) pseudogene	-
ENSG00000253330	0.23565	0.866655	0.380036	0.2094	0.176835	0.46741	0.603076	0.677098	0.704418	AC024451.2	8	47511034	47512141	-	1108	processed_pseudogene	NSFL1 (p97) cofactor (p47) (NSFL1C) pseudogene	-
ENSG00000101004	5.85027	5.60622	4.90911	3.84131	2.64921	3.40375	5.47885	4.44394	5.41113	NINL	20	25452705	25585517	-	6008	protein_coding	ninein like [Source:HGNC Symbol;Acc:HGNC:29163]	-
ENSG00000205022	0.0522201	0	0	0	0	0	0	0	0	PABPN1L	16	88863333	88866660	-	1314	protein_coding	poly(A) binding protein nuclear 1 like, cytoplasmic [Source:HGNC Symbol;Acc:HGNC:37237]	-
ENSG00000231232	0	0	0	0	0	0	0	0	0	AC023141.6	7	57822465	57822801	-	337	unprocessed_pseudogene	family with sequence similarity 27 (FAM27) pseudogene	-
ENSG00000213411	0.0287873	0	0.0580319	0	0	0	0	0	0	RBM22P2	13	30539597	30543461	-	1814	processed_pseudogene	RNA binding motif protein 22 pseudogene 2 [Source:HGNC Symbol;Acc:HGNC:39695]	-
ENSG00000252992	0	0	0.341785	0	0	0	0	0	0	RF00564	11	117263799	117263952	+	154	scaRNA		-
ENSG00000159658	51.6765	49.1915	55.2376	49.324	48.0272	48.2143	45.5244	47.6721	49.7966	EFCAB14	1	46675159	46719064	-	6285	protein_coding	EF-hand calcium binding domain 14 [Source:HGNC Symbol;Acc:HGNC:29051]	-
ENSG00000235631	0.0974256	0	0	0	0	0	0	0	0	RNF148	7	122701664	122702967	-	1304	protein_coding	ring finger protein 148 [Source:HGNC Symbol;Acc:HGNC:22411]	-
ENSG00000251791	0	0.572147	0	0.218882	0	0	0	0	0	SCARNA6	2	233288676	233288940	+	265	scaRNA	small Cajal body-specific RNA 6 [Source:HGNC Symbol;Acc:HGNC:32562]	-
ENSG00000144230	0.796524	0.308357	0.256912	0.318508	0.268975	0.143627	0.203846	0.335671	0.238101	GPR17	2	127645864	127652639	+	2671	protein_coding	G protein-coupled receptor 17 [Source:HGNC Symbol;Acc:HGNC:4471]	-
ENSG00000274091	0	0	0	0	0	0	0	0	0	SNORD1C	17	76558791	76558868	+	78	snoRNA	small nucleolar RNA, C/D box 1C [Source:HGNC Symbol;Acc:HGNC:32677]	-
ENSG00000259616	0	0	0	0	0	0	0	0	0	AC104574.2	15	61298791	61635449	-	1985	lincRNA	novel transcript	-
ENSG00000225360	0	0	0	0	0	0	0	0	0	AL772155.2	9	63729702	63730173	+	472	processed_pseudogene	novel pseudogene	-
ENSG00000251296	0	0	0	0	0	0	0	0	0	AC006499.6	4	10167159	10167765	-	607	processed_pseudogene	novel developmental pluripotency associated 4 (DPPA4) pseudogene	-
ENSG00000151623	0.240942	0.326463	0.356188	0.356836	0.467082	0.637208	0.234902	0.353843	0.480157	NR3C2	4	148078762	148444698	-	6607	protein_coding	nuclear receptor subfamily 3 group C member 2 [Source:HGNC Symbol;Acc:HGNC:7979]	ESR-like
ENSG00000243926	0.63352	0.700723	0.820995	0.603159	0.509358	1.06075	0.827196	0.953492	0.676339	TIPARP-AS1	3	156671862	156674378	-	1254	bidirectional_promoter_lncRNA	TIPARP antisense RNA 1 [Source:HGNC Symbol;Acc:HGNC:41028]	-
ENSG00000234358	0	0	0	0	0	0	0	0	0	AC003080.1	7	111971222	111971988	-	767	processed_pseudogene	ribosomal protein L8 (RPL8) pseudogene	-
ENSG00000254754	0	0	0	0	0	0	0	0	0	AC013799.1	11	25924188	25926808	+	348	lincRNA	novel transcript	-
ENSG00000233711	0	0	0	0	0	0	0	0	0	EIF4EBP2P1	20	43423196	43423538	-	343	processed_pseudogene	eukaryotic translation initiation factor 4E binding protein 2 pseudogene 1 [Source:HGNC Symbol;Acc:HGNC:16596]	-
ENSG00000280117	0	0	0	0	0	0	0	0	0	AC122688.4	12	125160525	125164918	+	4394	TEC	novel transcript	-
ENSG00000224892	0.136523	0.330324	0.344019	0.37911	0.320152	0.184631	0.249564	0.457654	0.127532	RPS4XP16	13	51454164	51461315	+	997	transcribed_processed_pseudogene	ribosomal protein S4X pseudogene 16 [Source:HGNC Symbol;Acc:HGNC:36365]	-
ENSG00000272677	0.508637	0.246135	0.427232	0	0.159037	0.22929	0.464895	0.162386	0.15838	AC124016.1	4	82374301	82384027	+	906	antisense	uncharacterized LOC101928963 [Source:NCBI gene;Acc:101928963]	-
ENSG00000211930	0	0	0	0	0	0	0	0	0	IGHD3-3	14	105914359	105914389	-	31	IG_D_gene	immunoglobulin heavy diversity 3-3 [Source:HGNC Symbol;Acc:HGNC:5498]	-
ENSG00000241720	0	0.125098	0	0	0.0606229	0	0.0590708	0.185699	0.0603725	AL158847.1	1	109725820	109775252	+	808	antisense	novel transcript	-
ENSG00000201806	0	0	0	0	0.347399	0.333907	0	0.354716	0	RNU4-8P	2	97664591	97664731	-	141	snRNA	RNA, U4 small nuclear 8, pseudogene [Source:HGNC Symbol;Acc:HGNC:10195]	-
ENSG00000247240	0.879126	0.170167	1.12241	0.716096	0.714683	0.475565	0.589249	0.449068	0.437988	UBL7-AS1	15	74461265	74481302	+	1710	antisense	UBL7 antisense RNA 1 (head to head) [Source:HGNC Symbol;Acc:HGNC:48614]	-
ENSG00000265303	0	0	0	0	0	0	0	0	0	AC099850.2	17	59197566	59215226	+	557	protein_coding	novel protein	-
ENSG00000258998	0.107893	0.0348069	0.018125	0	0.0337351	0	0.11505	0.086114	0.134383	LINC02302	14	44763157	44782829	-	2904	lincRNA	long intergenic non-protein coding RNA 2302 [Source:HGNC Symbol;Acc:HGNC:53221]	-
ENSG00000238585	0	0	0	0	0	0	0	0	0	RF00019	4	55501595	55501708	-	114	misc_RNA		-
ENSG00000198795	3.15911	2.50711	3.24789	2.03522	1.89651	2.30705	2.8008	3.05597	3.15763	ZNF521	18	25061926	25352190	-	6223	protein_coding	zinc finger protein 521 [Source:HGNC Symbol;Acc:HGNC:24605]	zf-C2H2
ENSG00000198879	0.0109706	0	0	0.0121857	0.0102906	0.0494548	0.0300814	0.0105074	0.0409924	SFMBT2	10	7158624	7411486	-	9953	protein_coding	Scm like with four mbt domains 2 [Source:HGNC Symbol;Acc:HGNC:20256]	-
ENSG00000088726	0	0	0	0	0.0862382	0.0414445	0.0420151	0	0	TMEM40	3	12733525	12769457	-	3562	protein_coding	transmembrane protein 40 [Source:HGNC Symbol;Acc:HGNC:25620]	-
ENSG00000125997	0	0	0	0.13458	0	0.109237	0.166111	0.058022	0	BPIFB9P	20	33347720	33354444	+	1611	transcribed_unitary_pseudogene	BPI fold containing family B member 9, pseudogene [Source:HGNC Symbol;Acc:HGNC:16109]	-
ENSG00000276795	0	0	0	0	0	0	0	0	0	AL391987.5	9	61912704	61913115	+	412	processed_pseudogene	family with sequence similarity 27, member D1 (FAM27D1) pseudogene	-
ENSG00000111678	18.6183	22.5418	20.1867	18.2086	20.1082	19.5948	22.3731	24.0129	22.5889	C12orf57	12	6942978	6946003	+	1806	protein_coding	chromosome 12 open reading frame 57 [Source:HGNC Symbol;Acc:HGNC:29521]	-
ENSG00000269425	0.187169	0.181146	0.377311	0	0.351135	0.168749	0.342145	0.179265	0.524526	AC104521.1	19	4339577	4343491	+	279	antisense	novel transcript, antisense to STAP2	-
ENSG00000134686	56.0702	58.3172	60.0574	72.9374	70.0785	67.963	55.8004	61.0481	55.1462	PHC2	1	33323623	33431052	-	4975	protein_coding	polyhomeotic homolog 2 [Source:HGNC Symbol;Acc:HGNC:3183]	-
ENSG00000151012	28.2255	21.3252	26.998	28.2409	29.3843	28.1169	22.1962	22.6844	20.3402	SLC7A11	4	138164097	138242349	-	9645	protein_coding	solute carrier family 7 member 11 [Source:HGNC Symbol;Acc:HGNC:11059]	-
ENSG00000233048	0	0	0	0	0	0	0	0	0	LINC01722	20	12865202	12952519	-	3033	lincRNA	long intergenic non-protein coding RNA 1722 [Source:HGNC Symbol;Acc:HGNC:52510]	-
ENSG00000230113	0	0	0	0	0	0	0	0	0	AC138207.1	17	30956280	30956961	-	545	antisense	novel transcript	-
ENSG00000235119	0	0.87641	0	0	0	0	0	0	0	AL138895.1	9	114396724	114398503	-	173	lincRNA	novel transcript	-
ENSG00000277443	90.9302	95.7948	86.8999	80.4455	76.2306	80.9242	97.4345	87.4999	95.8845	MARCKS	6	113857362	113863471	+	4275	protein_coding	myristoylated alanine rich protein kinase C substrate [Source:HGNC Symbol;Acc:HGNC:6759]	-
ENSG00000084676	5.17004	4.11384	5.78863	4.24779	4.89958	4.7093	4.21391	3.80313	4.24453	NCOA1	2	24491914	24770702	+	8633	protein_coding	nuclear receptor coactivator 1 [Source:HGNC Symbol;Acc:HGNC:7668]	-
ENSG00000159239	0	0.0215582	0	0	0.00696478	0.00669429	0.00678646	0	0	AC005041.1	2	74393836	74421662	-	7033	protein_coding	novel transcript	-
ENSG00000101974	8.75519	8.35304	10.3608	12.7132	12.6761	10.95	7.46213	7.00031	6.91475	ATP11C	X	139726346	139945276	-	7407	protein_coding	ATPase phospholipid transporting 11C [Source:HGNC Symbol;Acc:HGNC:13554]	-
ENSG00000188293	0	0	0	0	0	0	0	0	0	IGFL1	19	46229752	46231243	+	769	protein_coding	IGF like family member 1 [Source:HGNC Symbol;Acc:HGNC:24093]	-
ENSG00000200381	0	0	0	0	0	0	0	0	0	RNA5S4	1	228616991	228617109	-	119	rRNA	RNA, 5S ribosomal 4 [Source:HGNC Symbol;Acc:HGNC:34365]	-
ENSG00000254042	0.0257369	0.0498173	0	0.0285874	0	0	0.047047	0.12325	0	AC011365.1	5	168706567	168720884	+	3478	antisense	uncharacterized LOC101927969 [Source:NCBI gene;Acc:101927969]	-
ENSG00000214073	0	0	0	0	0	0	0	0	0	RPL21P17	3	1905651	1906125	+	475	processed_pseudogene	ribosomal protein L21 pseudogene 17 [Source:HGNC Symbol;Acc:HGNC:19416]	-
ENSG00000212321	0	0	0	0	0	0	0	0	0	RF00012	X	122840426	122840645	+	220	snoRNA		-
ENSG00000241217	0.175825	0.170167	0	0	0	0.475565	0.160704	0	0	RN7SL809P	12	56670450	56670746	-	297	misc_RNA	RNA, 7SL, cytoplasmic 809, pseudogene [Source:HGNC Symbol;Acc:HGNC:46825]	-
ENSG00000234592	0	0	0	0	0	0	0	0	0	AL359845.1	X	129041536	129043183	-	1648	processed_pseudogene	tight junction protein 4 (peripheral) (TJP4) pseudogene	-
ENSG00000233716	0	0	0.0467866	0	0	0	0	0	0	AC074367.1	2	63232453	63233577	-	1125	processed_pseudogene	family with sequence similarity 54, member A (FAM54A) pseudogene	-
ENSG00000184371	66.9082	72.8677	71.7784	25.9612	23.376	28.5618	70.4031	58.6582	70.332	CSF1	1	109910242	109930992	+	5418	protein_coding	colony stimulating factor 1 [Source:HGNC Symbol;Acc:HGNC:2432]	-
ENSG00000232801	0.586084	0.22689	0.236296	0.130199	0.439805	0.528406	0.321409	0.168401	0.602234	SDCBPP3	X	40890647	40891537	-	891	processed_pseudogene	syndecan binding protein pseudogene 3 [Source:HGNC Symbol;Acc:HGNC:44687]	-
ENSG00000269900	0	0	0	0	0	0	0	0	0	RMRP	9	35657751	35658018	-	268	lincRNA	RNA component of mitochondrial RNA processing endoribonuclease [Source:HGNC Symbol;Acc:HGNC:10031]	-
ENSG00000253250	1.986	1.86556	1.05976	1.29762	2.08206	2.15919	1.76182	2.01403	2.61911	C8orf88	8	90958637	90985257	-	894	protein_coding	chromosome 8 open reading frame 88 [Source:HGNC Symbol;Acc:HGNC:44672]	-
ENSG00000250107	0.167731	0.486999	0	0	0.0524446	0	0	0.0535492	0	CACNA1G-AS1	17	50556207	50562108	-	1579	antisense	CACNA1G antisense RNA 1 [Source:HGNC Symbol;Acc:HGNC:27377]	-
ENSG00000243406	0.130225	0.252068	0.175012	0.0964319	0.0814352	0.195681	0.198376	0.374177	0.162198	MRPS31P5	13	52167709	52194465	-	3873	transcribed_unprocessed_pseudogene	mitochondrial ribosomal protein S31 pseudogene 5 [Source:HGNC Symbol;Acc:HGNC:39253]	-
ENSG00000244451	0	0	0	0	0	0	0	0	0	RPL34P21	11	130082495	130082781	-	287	processed_pseudogene	ribosomal protein L34 pseudogene 21 [Source:HGNC Symbol;Acc:HGNC:35677]	-
ENSG00000230450	0	0	0	0	0	0	0	0	0	NEK2P4	2	131177618	131178946	-	1329	processed_pseudogene	NEK2 pseudogene 4 [Source:HGNC Symbol;Acc:HGNC:37818]	-
ENSG00000269069	0.358549	0.322224	0.464654	0.19913	0.360348	0.115451	0.0468163	0.245292	0.334935	AC007842.1	19	40023384	40025502	-	2039	processed_pseudogene	protein associated with topoisomerase II homolog 1 (yeast) (PATL1) pseudogene	-
ENSG00000241651	0	0	0	0	0	0	0	0	0	AC099340.1	4	128069014	128069612	-	599	processed_pseudogene	ribosomal protein L15 (RPL15) pseudogene	-
ENSG00000233655	0	0	0	0	0	0	0	0	0	IGHD4-4	14	105913222	105913237	-	16	IG_D_gene	immunoglobulin heavy diversity 4-4 [Source:HGNC Symbol;Acc:HGNC:5505]	-
ENSG00000267694	0	0	0	0	0	0	0	0	0	AP005131.5	18	13461020	13470823	-	498	antisense	novel transcript, antisense C18orf1	-
ENSG00000217539	0	0	0	0	0	0	0	0	0	IQCB2P	6	28010723	28012355	+	1633	processed_pseudogene	IQ motif containing B2 pseudogene [Source:HGNC Symbol;Acc:HGNC:17727]	-
ENSG00000211710	0	0	0	0	0	0	0	0	0	TRBV4-1	7	142313184	142313666	+	373	TR_V_gene	T cell receptor beta variable 4-1 [Source:HGNC Symbol;Acc:HGNC:12215]	-
ENSG00000275423	0	0	0	0	0	0	0	0	0	AC092650.2	2	47989625	47990526	+	902	processed_pseudogene	vomeronasal 1 receptor 4 (VN1R4) pseudogene	-
ENSG00000258380	0	0	0	0	0	0	0	0	0	AL356805.1	14	89399995	89409469	+	341	antisense	novel transcript, antisense to FOXN3	-
ENSG00000255189	0	0	0	0	0	0	0	0	0	GLYATL1P1	11	58978787	58994120	+	1607	unprocessed_pseudogene	glycine-N-acyltransferase like 1 pseudogene 1 [Source:HGNC Symbol;Acc:HGNC:37866]	-
ENSG00000273437	0.311762	0.301729	0	0.173146	0	0.702701	0.569901	0	0.436844	AC108673.3	3	129163606	129163940	-	335	lincRNA	novel transcript	-
ENSG00000202211	0	0	0	0	0	0	0	0	0	RF00019	15	43247680	43247781	+	102	misc_RNA		-
ENSG00000199127	0	0	0	0	0	0	0	0	0	MIR383	8	14853438	14853510	-	73	miRNA	microRNA 383 [Source:HGNC Symbol;Acc:HGNC:31876]	-
ENSG00000116251	81.826	93.3793	93.6542	88.2107	80.8247	81.8591	91.8004	97.9518	93.0126	RPL22	1	6185020	6209389	-	4682	protein_coding	ribosomal protein L22 [Source:HGNC Symbol;Acc:HGNC:10315]	-
ENSG00000230953	0.596801	0.577596	0.300771	0.33145	0.839714	0.538068	1.36369	0	1.11499	AC099677.1	1	52920422	52920596	+	175	processed_pseudogene	translational machinery associated 7 homolog (S. cerevisiae) (TMA7) pseudogene	-
ENSG00000274499	0	0	0	0	0	0	0	0	0	AC012414.7	15	20803505	20826173	-	1507	transcribed_processed_pseudogene	coxsackie virus and adenovirus receptor (CXADR) pseudogene	-
ENSG00000265456	0	0	0	0	0	0	0	0	0	MIR3672	X	121370972	121371053	+	82	miRNA	microRNA 3672 [Source:HGNC Symbol;Acc:HGNC:38957]	-
ENSG00000203808	0.240424	0.139612	0.0969336	0.106821	0.135313	0	0.219748	0.184217	0.134754	BVES-AS1	6	105136308	105169945	+	2371	antisense	BVES antisense RNA 1 [Source:HGNC Symbol;Acc:HGNC:21223]	-
ENSG00000226356	0	0	0	0	0	0	0	0	0	RPS6P20	12	131292068	131293176	-	1109	unprocessed_pseudogene	ribosomal protein S6 pseudogene 20 [Source:HGNC Symbol;Acc:HGNC:36940]	-
ENSG00000236316	0	0	0	0	0	0	0	0	0	OR7E109P	9	90742526	90743380	-	855	unprocessed_pseudogene	olfactory receptor family 7 subfamily E member 109 pseudogene [Source:HGNC Symbol;Acc:HGNC:15118]	-
ENSG00000206914	2.04785	0	0	0.568664	0	0	0	0.490343	0	RF00019	12	122768099	122768200	+	102	misc_RNA		-
ENSG00000257452	0	0	0	0	0	0	0	0	0	AC004551.1	12	112907628	113017751	-	575	antisense	novel transcript, antisense to OAS1, OAS2 and OAS3	-
ENSG00000144524	25.0435	21.2557	25.7999	29.3968	28.4192	25.1787	23.3952	23.759	23.9108	COPS7B	2	231781671	231809254	+	6066	protein_coding	COP9 signalosome subunit 7B [Source:HGNC Symbol;Acc:HGNC:16760]	-
ENSG00000261528	0.0719285	0.0696138	0	0	0	0	0	0	0.0671914	AC002400.1	16	23500905	23501630	+	726	processed_pseudogene	cyclin Y-like 1 (CCNYL1) pseudogene	-
ENSG00000186184	41.5415	42.9841	41.5861	41.1103	39.9151	43.0694	43.3297	41.9181	44.02	POLR1D	13	27620742	27744237	+	11210	protein_coding	RNA polymerase I and III subunit D [Source:HGNC Symbol;Acc:HGNC:20422]	-
ENSG00000132740	12.1847	12.1452	12.7303	17.1313	15.5304	16.3871	13.7268	12.9108	11.4578	IGHMBP2	11	68903842	68940602	+	6465	protein_coding	immunoglobulin mu DNA binding protein 2 [Source:HGNC Symbol;Acc:HGNC:5542]	-
ENSG00000128606	4.44063	4.17376	3.95945	2.65594	2.60336	3.00271	4.37095	5.31639	3.31056	LRRC17	7	102912991	102944949	+	2674	protein_coding	leucine rich repeat containing 17 [Source:HGNC Symbol;Acc:HGNC:16895]	-
ENSG00000243927	19.3539	22.4716	20.6079	32.2134	30.58	31.5735	21.1411	23.199	20.0636	MRPS6	21	34073224	34143034	+	4299	protein_coding	mitochondrial ribosomal protein S6 [Source:HGNC Symbol;Acc:HGNC:14051]	-
ENSG00000228688	0	0	0	0	0	0	0	0	0	COL11A2P1	6	33103794	33107330	-	676	unprocessed_pseudogene	collagen type XI alpha 2 pseudogene 1 [Source:HGNC Symbol;Acc:HGNC:13947]	-
ENSG00000167978	243.476	197.144	238.502	229.704	252.608	229.152	202.551	185.915	193.561	SRRM2	16	2752329	2772538	+	13266	protein_coding	serine/arginine repetitive matrix 2 [Source:HGNC Symbol;Acc:HGNC:16639]	-
ENSG00000203492	0	0	0	0	0	0	0	0	0	AL645937.1	6	29137410	29142934	-	1652	transcribed_unprocessed_pseudogene	olfactory receptor, family 2, subfamily N, member 1 pseudogene	-
ENSG00000283337	0	0	0	0	0	0	0	0	0.492737	RF00026	10	102868421	102868519	+	99	snRNA		-
ENSG00000241950	0	0	0	0	0	0	0	0	0	RPL29P23	11	33190062	33190503	-	442	processed_pseudogene	ribosomal protein L29 pseudogene 23 [Source:HGNC Symbol;Acc:HGNC:35946]	-
ENSG00000125388	6.42343	5.3341	5.71511	6.65039	5.61616	6.11302	5.65357	6.56993	6.25967	GRK4	4	2963608	3040747	+	4686	protein_coding	G protein-coupled receptor kinase 4 [Source:HGNC Symbol;Acc:HGNC:4543]	-
ENSG00000266840	0	0	0	0	0	0	0	0	0	AC068254.1	18	69704978	69724975	-	483	antisense	novel transcript, antisense to DOK6	-
ENSG00000060718	181.728	200.726	161.954	43.0583	40.3567	44.8889	215.775	178.119	191.766	COL11A1	1	102876467	103108872	-	9091	protein_coding	collagen type XI alpha 1 chain [Source:HGNC Symbol;Acc:HGNC:2186]	-
ENSG00000223698	0	0	0	0	0	0	0	0	0	GOLGA6L11P	Y	24168187	24174494	+	1298	unprocessed_pseudogene	golgin A6 family-like 11, pseudogene [Source:HGNC Symbol;Acc:HGNC:23958]	-
ENSG00000229593	0	0	0	0	0	0	0	0	0	SUCLA2P3	2	25079901	25081689	-	1357	processed_pseudogene	succinate-CoA ligase ADP-forming beta subunit pseudogene 3 [Source:HGNC Symbol;Acc:HGNC:38103]	-
ENSG00000238616	0	0	0	0	0	0	0	0	0	RNU6-300P	6	151201341	151201444	+	104	snRNA	RNA, U6 small nuclear 300, pseudogene [Source:HGNC Symbol;Acc:HGNC:47263]	-
ENSG00000138442	17.3339	18.1153	19.6372	20.8312	23.1253	22.3257	20.3032	19.3224	18.9477	WDR12	2	202874782	203014798	-	9098	protein_coding	WD repeat domain 12 [Source:HGNC Symbol;Acc:HGNC:14098]	-
ENSG00000258271	0	0	0	0	0	0	0	0	0	AC025260.1	12	93529560	93529989	-	430	processed_pseudogene	RNA binding motif protein, X-linked (RBMX) pseudogene	-
ENSG00000248813	0	0	0	0	0	0	0	0	0	AC022447.3	5	31741833	31742327	-	495	lincRNA	novel transcript	-
ENSG00000271317	0	0	0	0	0	0	0	0	0	IGHD4OR15-4A	15	20004797	20004815	-	19	IG_D_gene	immunoglobulin heavy diversity 4/OR15-4A (non-functional) [Source:HGNC Symbol;Acc:HGNC:5506]	-
ENSG00000251886	0	0	0	0	0	0	0	0	0	RNU6-120P	18	21120404	21120506	-	103	snRNA	RNA, U6 small nuclear 120, pseudogene [Source:HGNC Symbol;Acc:HGNC:47083]	-
ENSG00000225867	0.209719	0	0	0	0	0	0	0.301295	0	AL022315.1	22	37550026	37551735	+	498	antisense	novel transcript	-
ENSG00000252776	0	0	0	0	0	0	0	0	0	RNU4ATAC10P	11	122449210	122449331	+	122	snRNA	RNA, U4atac small nuclear 10, pseudogene [Source:HGNC Symbol;Acc:HGNC:46896]	-
ENSG00000199962	0	0	0	0	0	0	0	0	0	RF00019	21	17576798	17576906	+	109	misc_RNA		-
ENSG00000079482	8.05621	7.23456	7.13513	12.4985	12.6361	11.6452	6.83225	6.75468	6.36595	OPHN1	X	68042344	68433913	-	8224	protein_coding	oligophrenin 1 [Source:HGNC Symbol;Acc:HGNC:8148]	-
ENSG00000235720	1.07829	0.521796	0.465796	0.898288	1.01145	0.416646	0.24639	0.663916	0.791431	GABPAP	7	63893286	63894641	+	1356	processed_pseudogene	GABPA pseudogene [Source:HGNC Symbol;Acc:HGNC:4072]	-
ENSG00000214788	0	0	0	0	0	0	0	0	0	OOSP1	11	59942879	59970146	+	888	processed_transcript	oocyte secreted protein 1 [Source:NCBI gene;Acc:255649]	-
ENSG00000180138	0	0	0	0	0	0	0	0	0	CSNK1A1L	13	37103259	37105664	-	2406	protein_coding	casein kinase 1 alpha 1 like [Source:HGNC Symbol;Acc:HGNC:20289]	-
ENSG00000147082	0.502653	0.108106	0.56294	0.217126	0.419108	0.151062	0.0765709	0.213968	0.208689	CCNB3	X	50202713	50351910	+	5408	protein_coding	cyclin B3 [Source:HGNC Symbol;Acc:HGNC:18709]	-
ENSG00000277151	0.0295307	0.0190536	0	0	0	0.00887482	0	0	0	AL138820.1	13	32782874	32788178	+	5305	lincRNA	novel transcript	-
ENSG00000187653	639.793	929.555	878.028	1001.1	826.911	765.501	712.049	785.421	790.251	TMSB4XP8	4	90838903	90839037	-	135	processed_pseudogene	TMSB4X pseudogene 8 [Source:HGNC Symbol;Acc:HGNC:11885]	-
ENSG00000103266	71.2973	82.3956	79.4403	114.363	116.128	118.96	77.9178	102.757	78.5708	STUB1	16	680224	682870	+	2316	protein_coding	STIP1 homology and U-box containing protein 1 [Source:HGNC Symbol;Acc:HGNC:11427]	-
ENSG00000284595	0	0	0	0	0	0	0	0	0	MIR6785	17	75498548	75498628	+	81	miRNA	microRNA 6785 [Source:HGNC Symbol;Acc:HGNC:50206]	-
ENSG00000257955	0	0	0	0	0	0	0	0	0	AC004801.3	12	48019771	48025382	-	962	lincRNA	novel transcript	-
ENSG00000035928	35.0349	34.2932	34.7774	36.7997	42.0035	37.1776	35.5034	32.1555	35.21	RFC1	4	39287456	39366375	-	6719	protein_coding	replication factor C subunit 1 [Source:HGNC Symbol;Acc:HGNC:9969]	-
ENSG00000261081	0	0	0	0	0	0	0	0	0	AC025678.2	15	34409625	34410594	+	970	unprocessed_pseudogene	amyloid beta (A4) precursor protein-binding, family A, member 2 (APBA2) pseudogene	-
ENSG00000270493	0	0	0	0	0	0	0	0	0	AL670379.4	X	120937762	120938015	+	254	processed_pseudogene	coiled-coil domain containing 58 (CCDC58) pseudogene	-
ENSG00000252943	0	0	0	0	0	0	0	0.480913	0	RNU6-264P	9	19073843	19073946	+	104	snRNA	RNA, U6 small nuclear 264, pseudogene [Source:HGNC Symbol;Acc:HGNC:47227]	-
ENSG00000145979	18.6159	18.1555	19.7261	18.1858	19.3426	17.7307	22.7739	22.5387	21.6259	TBC1D7	6	13266542	13328583	-	8300	protein_coding	TBC1 domain family member 7 [Source:HGNC Symbol;Acc:HGNC:21066]	-
ENSG00000252050	0	0	0	0	0	0	0	0	0	RF00322	X	38308112	38308241	-	130	snoRNA		-
ENSG00000231104	0.273762	0.0662381	0.206953	0.0760207	0	0.24682	0.0625546	0.0655504	0	AC022395.1	10	118017487	118045810	+	2085	antisense	novel transcript, antisense to RAB11FIP2	-
ENSG00000279115	0	0	0	0	0	0	0	0	0	AC006386.2	Y	25307729	25307803	+	75	processed_pseudogene	ribosomal protein L41 (RPL41) pseudogene	-
ENSG00000204572	0.0444049	0	0	0	0	0	0	0	0	KRTAP5-10	11	71565563	71566738	+	1176	protein_coding	keratin associated protein 5-10 [Source:HGNC Symbol;Acc:HGNC:23605]	-
ENSG00000230417	0.496743	0.721136	0.813619	1.17249	0.757173	0.335893	0.567529	0.654179	0.638039	LINC00856	10	78179185	78551355	+	9354	lincRNA	long intergenic non-protein coding RNA 856 [Source:HGNC Symbol;Acc:HGNC:45111]	-
ENSG00000164318	0	0	0	0.161032	0.0271978	0.0261416	0	0.083312	0.0270855	EGFLAM	5	38258409	38465021	+	5724	protein_coding	EGF like, fibronectin type III and laminin G domains [Source:HGNC Symbol;Acc:HGNC:26810]	-
ENSG00000203334	0	0	0.0253296	0	0	0	0	0	0	AP003027.1	11	108957718	108959797	+	2080	lincRNA	novel transcript	-
ENSG00000230686	0	0	0	0	0	0	0	0.160562	0	AC067945.2	2	191017954	191019079	+	623	antisense	novel transcript	-
ENSG00000200142	0	0	0	0	0	0	0	0	0	RF00019	15	90977208	90977305	-	98	misc_RNA		-
ENSG00000276809	0.251058	0.0971916	0	0.0557729	0.141298	0.13581	0.0917869	0.0480913	0	AL138955.1	13	95744726	95745765	+	1040	sense_intronic	novel transcript, sense intronic to DNAJC3	-
ENSG00000163623	0.0216591	0	0	0.0721739	0.0406332	0.0781102	0	0	0.060698	NKX6-1	4	84491987	84498450	-	3086	protein_coding	NK6 homeobox 1 [Source:HGNC Symbol;Acc:HGNC:7839]	Homeobox
ENSG00000253287	0	0	0	0	0	0	0	0	0	AC104012.1	8	71779605	71792875	-	719	lincRNA	novel transcript	-
ENSG00000124226	63.0911	68.942	65.704	68.2785	65.9661	69.8908	63.663	67.3555	58.419	RNF114	20	49936336	49953892	+	4344	protein_coding	ring finger protein 114 [Source:HGNC Symbol;Acc:HGNC:13094]	-
ENSG00000184305	0.0331978	0.0321295	0	0.0737492	0.03114	0.0299307	0	0	0.0310114	CCSER1	4	90127535	91601913	+	10474	protein_coding	coiled-coil serine rich protein 1 [Source:HGNC Symbol;Acc:HGNC:29349]	-
ENSG00000224689	0	0	0	0	0	0	0	0	0	ZNF812P	19	9689924	9700776	-	2332	transcribed_unprocessed_pseudogene	zinc finger protein 812, pseudogene [Source:HGNC Symbol;Acc:HGNC:33242]	zf-C2H2
ENSG00000285043	0.696268	0.99306	0.960356	1.13972	0.824982	0.925099	0.971331	0.737063	0.581948	AC093512.2	16	30053090	30070420	+	3369	protein_coding	Homo sapiens aldolase, fructose-bisphosphate A (ALDOA), transcript variant 7, mRNA. [Source:RefSeq mRNA;Acc:NM_001355562]	-
ENSG00000236466	0	0	0	0	0	0	0	0	0	AL359633.2	6	46492052	46532758	+	622	antisense	uncharacterized LOC101926898 [Source:NCBI gene;Acc:101926898]	-
ENSG00000162706	0	0.0216537	0.0676541	0.0497033	0.0419737	0.0403436	0.0204495	0.0214289	0.0418003	CADM3	1	159171609	159203313	+	3847	protein_coding	cell adhesion molecule 3 [Source:HGNC Symbol;Acc:HGNC:17601]	-
ENSG00000144712	0.365975	0.619847	0.507213	0.508136	0.386202	0.309336	0.501752	0.547689	0.512809	CAND2	3	12796472	12871916	+	5587	protein_coding	cullin associated and neddylation dissociated 2 (putative) [Source:HGNC Symbol;Acc:HGNC:30689]	-
ENSG00000260422	0	0	0	0	0	0	0	0	0	Z97205.2	6	164084023	164085661	-	1639	lincRNA	novel transcript	-
ENSG00000215177	0	0	0	0	0	0	0	0	0	IGLV8OR8-1	8	47202444	47202897	-	352	IG_V_pseudogene	immunoglobulin lambda variable 8/OR8-1 (pseudogene) [Source:HGNC Symbol;Acc:HGNC:5932]	-
ENSG00000275869	0	0.0708831	0	0	0	0	0.0334707	0	0	AC136612.1	KI270728.1	933862	936467	-	1426	protein_coding	TP53 target 3 family member E [Source:NCBI gene;Acc:102724101]	-
ENSG00000256056	0	0	0	0	0	0	0	0.0538955	0	AC087257.2	12	27592461	27594039	-	928	unprocessed_pseudogene	chromosome 12 open reading frame 71 (C12orf71) pseudogene	-
ENSG00000206836	0	0	0	0	0	0	0	0	0	RNU6-1029P	2	197447745	197447851	+	107	snRNA	RNA, U6 small nuclear 1029, pseudogene [Source:HGNC Symbol;Acc:HGNC:47992]	-
ENSG00000232042	0	0	0	0	0	0	0	0	0	AL512286.1	X	120273127	120273526	+	400	processed_pseudogene	prefoldin 4 (PFDN4) pseudogene	-
ENSG00000188064	0	0.0262135	0	0.0601699	0.152438	0.0976783	0	0	0	WNT7B	22	45920362	45977129	-	5051	protein_coding	Wnt family member 7B [Source:HGNC Symbol;Acc:HGNC:12787]	-
ENSG00000170903	21.6138	22.7505	23.6539	23.6571	21.051	23.7894	25.6671	24.0253	23.4694	MSANTD4	11	105995623	106022403	-	5105	protein_coding	Myb/SANT DNA binding domain containing 4 with coiled-coils [Source:HGNC Symbol;Acc:HGNC:29383]	-
ENSG00000279917	0	0	0	0	0	0	0	0	0	AC079331.2	17	67611277	67613822	+	2546	TEC	TEC	-
ENSG00000251636	0	0	0	0	0	0	0	0	0	LINC01218	4	100812255	100814280	-	481	sense_intronic	long intergenic non-protein coding RNA 1218 [Source:HGNC Symbol;Acc:HGNC:41420]	-
ENSG00000204540	3.63456	3.10377	2.9092	2.19666	1.50409	2.16852	2.93117	3.32751	2.69618	PSORS1C1	6	31114750	31140092	+	5781	protein_coding	psoriasis susceptibility 1 candidate 1 [Source:HGNC Symbol;Acc:HGNC:17202]	-
ENSG00000251293	0	0	0	0	0	0	0	0	0	AC008574.1	5	120245448	120333502	-	433	lincRNA	novel transcript	-
ENSG00000067248	13.68	13.6147	16.6813	22.1768	22.1465	21.0959	14.2093	15.3957	14.7363	DHX29	5	55256245	55307722	-	4734	protein_coding	DExH-box helicase 29 [Source:HGNC Symbol;Acc:HGNC:15815]	-
ENSG00000105392	0	0	0	0	0	0	0	0	0	CRX	19	47819779	47843330	+	5991	protein_coding	cone-rod homeobox [Source:HGNC Symbol;Acc:HGNC:2383]	TF_Otx
ENSG00000181511	0	0	0	0	0	0	0	0	0	AC011890.1	X	120733094	120733396	+	303	processed_pseudogene	novel pseudogene	-
ENSG00000259068	0	0	0	0	0	0	0	0	0	TRAV37	14	22265749	22266264	+	342	TR_V_pseudogene	T cell receptor alpha variable 37 (pseudogene) [Source:HGNC Symbol;Acc:HGNC:12136]	-
ENSG00000255085	0	0	0	0	0	0	0	0	0	AF186192.2	8	144700353	144708517	+	1680	transcribed_unprocessed_pseudogene	zinc finger protein 154 (ZNF154) pseudogene	-
ENSG00000231977	0	0	0	0	0	0	0	0	0	AL096828.1	20	63166797	63180903	-	542	lincRNA	novel transcript	-
ENSG00000215115	0	0	0	0	0	0	0	0	0	CXorf49	X	71714371	71718151	-	1756	protein_coding	chromosome X open reading frame 49 [Source:HGNC Symbol;Acc:HGNC:30891]	-
ENSG00000207771	0	0	0	0	0	0	0	0	0	MIR550A1	7	30289794	30289890	+	97	miRNA	microRNA 550a-1 [Source:HGNC Symbol;Acc:HGNC:32804]	-
ENSG00000106236	0.0884088	0	0	0.065467	0.0276429	0.0531388	0.0538704	0	0.0275288	NPTX2	7	98617297	98629868	+	3016	protein_coding	neuronal pentraxin 2 [Source:HGNC Symbol;Acc:HGNC:7953]	-
ENSG00000132763	3.84624	2.67936	3.47207	3.82623	3.64748	3.62015	2.60762	3.21829	3.47448	MMACHC	1	45500053	45513382	+	5296	protein_coding	methylmalonic aciduria (cobalamin deficiency) cblC type, with homocystinuria [Source:HGNC Symbol;Acc:HGNC:24525]	-
ENSG00000163001	19.0137	22.2828	24.0695	21.9203	23.2026	23.4389	23.6381	24.5975	24.159	CFAP36	2	55519604	55545879	+	3505	protein_coding	cilia and flagella associated protein 36 [Source:HGNC Symbol;Acc:HGNC:30540]	-
ENSG00000255872	0	0	0	0.0447733	0	0	0.0368423	0.0386067	0.0753083	AL138752.2	9	37588413	38068687	-	2591	protein_coding	novel transcript	-
ENSG00000111581	9.27487	9.76657	11.6857	13.8571	15.7151	15.1342	9.64135	10.9163	9.51823	NUP107	12	68686734	68745809	+	8320	protein_coding	nucleoporin 107 [Source:HGNC Symbol;Acc:HGNC:29914]	-
ENSG00000268864	0.040418	0	0	0	0	0	0	0	0	AC011487.2	19	53599628	53608451	-	2047	transcribed_unprocessed_pseudogene	solute carrier family 7 member 3 pseudogene [Source:NCBI gene;Acc:284379]	-
ENSG00000249489	0	0	0	0	0	0	0	0	0	GAPDHP70	11	88408179	88409223	-	1045	processed_pseudogene	glyceraldehyde 3 phosphate dehydrogenase pseudogene 70 [Source:HGNC Symbol;Acc:HGNC:4148]	-
ENSG00000175336	0	0	0.0306909	0	0	0	0	0	0	APOF	12	56360569	56362823	-	1715	protein_coding	apolipoprotein F [Source:HGNC Symbol;Acc:HGNC:615]	-
ENSG00000138443	16.8971	15.801	17.7915	18.0894	18.0867	18.5788	16.0588	16.4569	15.3273	ABI2	2	203328219	203447723	+	23331	protein_coding	abl interactor 2 [Source:HGNC Symbol;Acc:HGNC:24011]	-
ENSG00000241388	0	0	0	0.0632538	0	0	0	0	0	HNF1A-AS1	12	120941728	120980965	-	4671	processed_transcript	HNF1A antisense RNA 1 [Source:HGNC Symbol;Acc:HGNC:26785]	-
ENSG00000198964	15.4304	18.6489	17.4684	22.0364	24.6699	23.4377	14.6939	16.5261	15.7988	SGMS1	10	50305586	50625163	-	6429	protein_coding	sphingomyelin synthase 1 [Source:HGNC Symbol;Acc:HGNC:29799]	-
ENSG00000188315	1.59979	2.05671	2.28638	1.61785	1.63502	1.65763	1.65863	2.19545	1.8067	C3orf62	3	49268602	49277909	-	4813	protein_coding	chromosome 3 open reading frame 62 [Source:HGNC Symbol;Acc:HGNC:24771]	-
ENSG00000258741	1.27084	1.00632	1.63029	0.898288	1.19207	0.520807	1.05596	0.442611	0.86338	H2AFVP1	15	92715710	92734195	-	790	transcribed_processed_pseudogene	H2A histone family member V pseudogene 1 [Source:HGNC Symbol;Acc:HGNC:31026]	-
ENSG00000253682	0	0	0	0	0	0	0	0	0	AC022695.2	8	92403545	92413645	-	768	lincRNA	novel transcript	-
ENSG00000181524	14.6365	13.8054	12.8774	13.7776	16.9871	16.7747	17.6859	20.6713	16.6852	RPL24P4	6	42956345	42956765	-	421	processed_pseudogene	ribosomal protein L24 pseudogene 4 [Source:HGNC Symbol;Acc:HGNC:21371]	-
ENSG00000259106	0	0	0	0	0	0.0854464	0	0	0	AC008056.2	14	79611418	79633311	-	551	antisense	novel transcript, antisense to NRXN3	-
ENSG00000277655	0	0	0	0	0	0	0	0	0	AC245407.1	1	146459449	146461859	+	451	unprocessed_pseudogene	neuroblastoma breakpoint family, member 6 (NBPF6) pseudogene	-
ENSG00000103599	0.578794	0.591289	0.48616	0.892915	0.663567	0.78275	0.911087	0.369569	0.630788	IQCH	15	67254800	67502260	+	7108	protein_coding	IQ motif containing H [Source:HGNC Symbol;Acc:HGNC:25721]	-
ENSG00000120738	7.92122	5.6692	8.01768	7.6525	5.07316	6.91661	6.25134	8.11269	5.82946	EGR1	5	138465490	138469315	+	3138	protein_coding	early growth response 1 [Source:HGNC Symbol;Acc:HGNC:3238]	zf-C2H2
ENSG00000226484	0	0	0	0	0	0	0	0	0	AL606516.1	X	36365626	36440292	-	1861	antisense	uncharacterized LOC101928627 [Source:NCBI gene;Acc:101928627]	-
ENSG00000010072	6.67322	6.93792	7.43116	8.35099	7.35296	7.43522	7.05817	7.81484	8.46589	SPRTN	1	231337104	231355023	+	5906	protein_coding	SprT-like N-terminal domain [Source:HGNC Symbol;Acc:HGNC:25356]	-
ENSG00000261161	0	0	0	0.114181	0	0	0.0939551	0	0	AC009154.1	16	86646301	86668923	+	508	lincRNA	novel transcript	-
ENSG00000213315	0	0	0	0	0	0	0	0	0	AL122020.1	14	90766531	90766989	+	459	processed_pseudogene	ribosomal protein S18 (RPS18) pseudogene	-
ENSG00000285750	0	0	0	0	0	0	0	0	0	AL157385.2	10	24816331	24822950	+	2057	lincRNA	novel transcript	-
ENSG00000263167	0	0	0	0	0	0	0	0	0	AC115099.1	17	81135771	81136256	+	362	antisense	novel transcript, antisense to AATK	-
ENSG00000279645	0.0124393	0	0.0501524	0	0	0	0.022739	0	0.0348601	AC016251.1	15	96285068	96289265	-	4198	TEC	TEC	-
ENSG00000283291	0	0	0	0	0	0	0	0	0	RF00002	20	29741510	29741661	-	152	rRNA		-
ENSG00000141314	0	0	0.0220599	0.0972402	0	0	0	0	0	RHBDL3	17	32266176	32324661	+	5404	protein_coding	rhomboid like 3 [Source:HGNC Symbol;Acc:HGNC:16502]	-
ENSG00000265808	53.4069	54.0076	55.7176	67.1556	63.9159	64.7363	50.5036	54.2667	50.0495	SEC22B	1	120150898	120176515	-	9034	protein_coding	SEC22 homolog B, vesicle trafficking protein (gene/pseudogene) [Source:HGNC Symbol;Acc:HGNC:10700]	-
ENSG00000163814	5.63004	4.02495	2.9659	6.14465	6.03551	7.28676	3.92663	4.75349	3.26184	CDCP1	3	45082278	45146422	-	6507	protein_coding	CUB domain containing protein 1 [Source:HGNC Symbol;Acc:HGNC:24357]	-
ENSG00000214067	0	0	0	0	0	0	0	0	0	AL360182.1	10	110257064	110257843	+	468	processed_pseudogene	ribosomal protein L21 (RPL21) pseudogene	-
ENSG00000248949	0	0	0	0	0	0	0	0.178945	0	AC122719.1	5	946315	956520	+	559	lincRNA	novel transcript	-
ENSG00000239975	0	0	0	0	0	0	0	0	0	IGKV1D-33	2	89913982	89916052	+	479	IG_V_gene	immunoglobulin kappa variable 1D-33 [Source:HGNC Symbol;Acc:HGNC:5753]	-
ENSG00000181296	0	0	0	0	0	0	0	0	0	OR5G1P	11	56775261	56776206	-	946	unprocessed_pseudogene	olfactory receptor family 5 subfamily G member 1 pseudogene [Source:HGNC Symbol;Acc:HGNC:8344]	-
ENSG00000198909	20.5412	20.8243	19.3113	19.8965	21.2252	19.106	20.2608	21.5425	19.7959	MAP3K3	17	63622415	63696303	+	6107	protein_coding	mitogen-activated protein kinase kinase kinase 3 [Source:HGNC Symbol;Acc:HGNC:6855]	-
ENSG00000235803	0	0	0	0	0	0	0	0	0	MTCO2P23	10	69590583	69591262	-	680	processed_pseudogene	MT-CO2 pseudogene 23 [Source:HGNC Symbol;Acc:HGNC:52152]	-
ENSG00000285100	0	0	0	0	0	0	0	0	0	AL359555.2	20	38270778	38274020	+	3243	lincRNA	novel transcript	-
ENSG00000249278	0	0	0	0	0	0	0	0	0	AC112249.1	4	76509284	76509719	-	436	processed_pseudogene	ribosomal protein L18 (RPL18) pseudogene	-
ENSG00000270749	0	0	0	0	0	0	0	0	0	AC064862.7	7	57629285	57630151	+	867	processed_pseudogene	abhydrolase domain containing 15, pseudogene	-
ENSG00000138794	8.57164	9.64901	9.80394	10.8715	11.3477	10.6329	8.16786	10.6551	9.9947	CASP6	4	109688622	109703583	-	1943	protein_coding	caspase 6 [Source:HGNC Symbol;Acc:HGNC:1507]	-
ENSG00000257287	0	0	0	0	0	0	0	0	0	AC016256.1	12	72431722	72432075	-	354	processed_pseudogene	histone cluster 3, H3 (HIST3H3) pseudogene	-
ENSG00000250186	0	0	0	0	0	0	0	0	0	AC091180.3	17	49404081	49405197	+	963	antisense	novel transcript, antisense to PHB	-
ENSG00000225187	0.0607211	0	0.122407	0.269785	0	0	0	0.058157	0	AC073283.1	2	47067822	47071204	+	860	antisense	novel transcript	-
ENSG00000250350	0	0	0	0	0	0	0	0	0	AC104819.2	4	151279030	151279192	-	163	unprocessed_pseudogene	epidermis-specific serine protease-like protein (ESSPL) pseudogene	-
ENSG00000163888	1.30359	1.29874	1.39123	1.02209	1.54646	1.1753	1.36669	0.8446	0.895392	CAMK2N2	3	184259213	184261463	-	1362	protein_coding	calcium/calmodulin dependent protein kinase II inhibitor 2 [Source:HGNC Symbol;Acc:HGNC:24197]	-
ENSG00000075213	9.16863	8.26434	14.2346	37.9092	38.1751	38.4939	5.75352	9.38436	7.43986	SEMA3A	7	83955777	84492724	-	9371	protein_coding	semaphorin 3A [Source:HGNC Symbol;Acc:HGNC:10723]	-
ENSG00000171262	12.502	15.4433	16.0836	17.3928	17.7655	17.9495	12.4037	13.8309	14.5577	FAM98B	15	38454127	38487710	+	6851	protein_coding	family with sequence similarity 98 member B [Source:HGNC Symbol;Acc:HGNC:26773]	-
ENSG00000227971	0	0	0	0	0	0	0	0	0	AC078809.1	3	189645327	189645466	-	140	processed_pseudogene	serine/arginine-rich splicing factor 10 (SRSF10) pseudogene	-
ENSG00000276532	0	0	0	0	0	0	0	0	0	RF00017	17	18605054	18605356	-	303	misc_RNA		-
ENSG00000242889	0	0	0	0	0	0	0	0.524633	0	RN7SL449P	17	57618108	57618393	+	286	misc_RNA	RNA, 7SL, cytoplasmic 449, pseudogene [Source:HGNC Symbol;Acc:HGNC:46465]	-
ENSG00000279139	0	0	0	0	0	0	0	0	0	AC098679.3	4	158109500	158110153	-	654	TEC	TEC	-
ENSG00000166840	0.106899	0.258647	0.323244	0.534323	0.350955	0.385514	0	0.102385	0.0499293	GLYATL1	11	58905398	59043527	+	5440	protein_coding	glycine-N-acyltransferase like 1 [Source:HGNC Symbol;Acc:HGNC:30519]	-
ENSG00000074416	36.408	31.5081	37.5094	91.7041	99.1239	95.7282	32.3104	31.0845	31.1173	MGLL	3	127689062	128052190	-	11849	protein_coding	monoglyceride lipase [Source:HGNC Symbol;Acc:HGNC:17038]	-
ENSG00000227244	0	0	0	0	0	0	0	0	0	LINC00845	10	61016275	61026420	+	696	lincRNA	long intergenic non-protein coding RNA 845 [Source:HGNC Symbol;Acc:HGNC:45033]	-
ENSG00000177369	0	0	0	0	0	0	0	0	0	FLJ40194	17	49248239	49258662	+	2567	processed_transcript	uncharacterized FLJ40194 [Source:NCBI gene;Acc:124871]	-
ENSG00000231060	0	0	0	0	0	0	0	0	0	FARSBP1	10	80776165	80778088	-	1778	processed_pseudogene	FARSB pseudogene 1 [Source:HGNC Symbol;Acc:HGNC:45115]	-
ENSG00000232489	0.0416097	0	0	0	0	0	0	0	0	MFAP1P1	13	30541643	30542897	-	1255	processed_pseudogene	microfibril associated protein 1 pseudogene 1 [Source:HGNC Symbol;Acc:HGNC:39694]	-
ENSG00000235845	0	0	0	0	0	0	0	0	0	AC098649.1	3	44899178	44900925	+	569	antisense	novel transcript	-
ENSG00000243911	0	0	0	0	0	0	0	0	0	RN7SL430P	9	112272596	112272837	-	242	misc_RNA	RNA, 7SL, cytoplasmic 430, pseudogene [Source:HGNC Symbol;Acc:HGNC:46446]	-
ENSG00000255966	0.109476	0	0.110346	0.121601	0.205381	0.296107	0	0.419413	0	AC006064.3	12	6532290	6533498	-	477	antisense	novel transcript	-
ENSG00000148950	7.76566	7.43907	9.42477	7.56954	7.28431	6.28699	7.89451	10.0941	8.06847	IMMP1L	11	31432401	31509645	-	3901	protein_coding	inner mitochondrial membrane peptidase subunit 1 [Source:HGNC Symbol;Acc:HGNC:26317]	-
ENSG00000278421	0	0	0	0	0	0	0	0	0	RF02119	X	74274341	74274411	+	71	misc_RNA		-
ENSG00000225174	0	0	0	0	0	0	0	0	0	OSTM1-AS1	6	108123515	108159392	+	3452	lincRNA	OSTM1 antisense RNA 1 [Source:HGNC Symbol;Acc:HGNC:43666]	-
ENSG00000231465	0	0	0	0	0	0	0	0	0	AL359636.2	9	122471358	122475817	+	259	antisense	novel transcript	-
ENSG00000234553	0	0	0	0	0	0	0	0	0	AC022431.1	5	56536583	56537826	-	536	sense_intronic	novel transcript	-
ENSG00000229415	0	0	0	0	0	0	0	0	0	SFTA3	14	36473288	36513829	-	3108	protein_coding	surfactant associated 3 [Source:HGNC Symbol;Acc:HGNC:18387]	-
ENSG00000279900	0.115531	0.111813	0.465796	0.384981	0.10837	0.104161	0.105596	0.221305	0	AP001767.4	11	83083687	83084138	+	452	TEC	TEC	-
ENSG00000239182	0	0	0	0	0	0	0	0	0	RF00566	X	118738055	118738182	+	128	snoRNA		-
ENSG00000284377	0	0	0	0	0	0	0	0	0	AL589669.1	X	147181064	147271894	+	1506	lincRNA	periphilin-1-like [Source:NCBI gene;Acc:105373347]	-
ENSG00000138760	117.14	115.602	115.533	94.7096	94.2	98.094	109.401	105.403	107.612	SCARB2	4	76158733	76234536	-	19341	protein_coding	scavenger receptor class B member 2 [Source:HGNC Symbol;Acc:HGNC:1665]	-
ENSG00000077984	0	0	0	0	0.0526702	0	0	0	0	CST7	20	24949230	24959928	+	930	protein_coding	cystatin F [Source:HGNC Symbol;Acc:HGNC:2479]	-
ENSG00000257453	0	0	0	0	0	0	0	0.0878998	0.171462	AC011611.3	12	76030494	76031378	+	569	antisense	novel transcript, antisense to PHLDA1	-
ENSG00000250629	0	0.0894507	0	0	0	0.166658	0.253429	0	0	AC091435.2	5	38783580	38792754	+	565	antisense	novel transcript	-
ENSG00000224711	0	0	0	0	0	0	0	0	0	LINC01706	20	7347467	7367632	+	748	lincRNA	long intergenic non-protein coding RNA 1706 [Source:HGNC Symbol;Acc:HGNC:52494]	-
ENSG00000230748	0	0	0	0	0	0	0	0	0	AL157714.1	1	165497724	165498348	+	625	processed_pseudogene	px19-like protein (PX19) pseudogene	-
ENSG00000226981	0.0500193	0.145229	0.0504166	0.111118	0.234594	0.0450967	0.0457176	0.0958142	0.046725	ABHD17AP6	17	20814620	20844257	+	1044	unprocessed_pseudogene	abhydrolase domain containing 17A pseudogene 6 [Source:HGNC Symbol;Acc:HGNC:34044]	-
ENSG00000243894	0	0	0	0	0	0	0	0	0	AC116562.1	4	4076711	4077491	-	781	processed_pseudogene	ribosomal protein S3A (RPS3A) pseudogene	-
ENSG00000188393	0	0	0	0	0	0	0	0	0	CLEC2A	12	9898673	9932381	-	1220	protein_coding	C-type lectin domain family 2 member A [Source:HGNC Symbol;Acc:HGNC:24191]	-
ENSG00000274630	0	0	0	0	0	0	0	0	0	AC125257.2	17	41867581	41867736	+	156	antisense	novel transcript, antisense to ACLY	-
ENSG00000260602	0	0	0	0	0	0	0	0	0	HMGN2P40	15	68254549	68254939	+	391	processed_pseudogene	high mobility group nucleosomal binding domain 2 pseudogene 40 [Source:HGNC Symbol;Acc:HGNC:39411]	-
ENSG00000115361	0.155765	0.226128	0.157002	0.0432541	0	0	0.177961	0.0745936	0.291012	ACADL	2	210187939	210225491	-	4383	protein_coding	acyl-CoA dehydrogenase long chain [Source:HGNC Symbol;Acc:HGNC:88]	-
ENSG00000188536	0	0	0	0	0	0	0	0	0	HBA2	16	172876	173710	+	827	protein_coding	hemoglobin subunit alpha 2 [Source:HGNC Symbol;Acc:HGNC:4824]	-
ENSG00000261087	0.092425	0.143121	0.0931592	0.0821292	0.0693569	0.0833291	0.219639	0.123931	0.0690704	AP003469.4	8	101166805	101169629	-	2825	lincRNA	novel transcript	-
ENSG00000266663	0	0	0	0	0	0	0	0	0	MIR3169	13	61199798	61199880	-	83	miRNA	microRNA 3169 [Source:HGNC Symbol;Acc:HGNC:38380]	-
ENSG00000207082	0	0	0	0	0.457788	0	0	0	0	RNU6-171P	1	164639565	164639671	+	107	snRNA	RNA, U6 small nuclear 171, pseudogene [Source:HGNC Symbol;Acc:HGNC:47134]	-
ENSG00000277274	0	0	0	0	0	0	0	0	0	DUX4L22	10	133677059	133678327	+	1269	unprocessed_pseudogene	double homeobox 4 like 22 [Source:HGNC Symbol;Acc:HGNC:50803]	-
ENSG00000100292	118.233	118.012	104.404	117.736	132.048	106.839	149.81	140.433	129.648	HMOX1	22	35380361	35394214	+	2405	protein_coding	heme oxygenase 1 [Source:HGNC Symbol;Acc:HGNC:5013]	-
ENSG00000200563	0	0	0	0	0	0	0	0	0	RNU6-640P	2	86515204	86515308	-	105	snRNA	RNA, U6 small nuclear 640, pseudogene [Source:HGNC Symbol;Acc:HGNC:47603]	-
ENSG00000167447	16.0087	16.2364	17.1858	20.4612	21.5475	21.0814	16.3858	16.8029	16.5676	SMG8	17	59209400	59215247	+	3752	protein_coding	SMG8, nonsense mediated mRNA decay factor [Source:HGNC Symbol;Acc:HGNC:25551]	-
ENSG00000284638	0	0	0	0	0	0	0	0	0	AC005551.1	19	3482804	3483446	-	493	protein_coding	novel protein	-
ENSG00000135074	131.841	128.065	153.099	109.049	110.495	114.087	120.865	123.208	121.936	ADAM19	5	157395534	157575775	-	7704	protein_coding	ADAM metallopeptidase domain 19 [Source:HGNC Symbol;Acc:HGNC:197]	-
ENSG00000225542	0	0	0	0	0	0	0	0	0	ZNF385D-AS1	3	21542816	21579959	+	705	antisense	ZNF385D antisense RNA 1 [Source:HGNC Symbol;Acc:HGNC:41136]	-
ENSG00000184012	0	0	0	0	0.0361767	0.0347717	0.0352505	0	0	TMPRSS2	21	41464551	41531116	-	6117	protein_coding	transmembrane serine protease 2 [Source:HGNC Symbol;Acc:HGNC:11876]	-
ENSG00000185010	1.8631	1.80315	1.57386	0.906617	0.91542	0.927861	1.638	1.49552	1.8067	F8	X	154835788	155026940	-	10986	protein_coding	coagulation factor VIII [Source:HGNC Symbol;Acc:HGNC:3546]	-
ENSG00000243144	0.174067	0.252698	0.0877249	0.0966729	0.0816388	0.0784682	0.0795486	0.250075	0.0813016	AC079760.2	7	91311368	91515409	+	1162	lincRNA	novel transcript	-
ENSG00000166069	0	0	0	0	0	0	0	0	0	TMCO5A	15	37921939	37967724	+	5313	protein_coding	transmembrane and coiled-coil domains 5A [Source:HGNC Symbol;Acc:HGNC:28558]	-
ENSG00000265327	0	0	0	0	0	0	0	0	0	RN7SL411P	3	40209005	40209304	+	300	misc_RNA	RNA, 7SL, cytoplasmic 411, pseudogene [Source:HGNC Symbol;Acc:HGNC:46427]	-
ENSG00000254278	0	0	0	0	0.0347893	0.0668763	0	0	0.0346456	AC107953.2	8	119062942	119068782	-	1408	antisense	uncharacterized LOC101927513 [Source:NCBI gene;Acc:101927513]	-
ENSG00000259518	0.323487	0.0894507	0.326057	0.153992	0.043348	0	0.675811	0.177044	0.388521	LINC01583	15	82088594	82097694	+	2568	lincRNA	long intergenic non-protein coding RNA 1583 [Source:HGNC Symbol;Acc:HGNC:51425]	-
ENSG00000258314	0	0	0	0	0	0	0	0	0	AL589182.1	14	19024090	19055551	+	796	lincRNA	novel transcript	-
ENSG00000252649	0	0	0	0	0	0	0	0	0	RNA5SP480	20	31356870	31356978	+	109	rRNA_pseudogene	RNA, 5S ribosomal pseudogene 480 [Source:HGNC Symbol;Acc:HGNC:43380]	-
ENSG00000234397	0	0	0	0	0	0	0	0	0	PPIAP34	1	22322840	22323331	-	492	processed_pseudogene	peptidylprolyl isomerase A pseudogene 34 [Source:HGNC Symbol;Acc:HGNC:53658]	-
ENSG00000240502	0	0	0	0	0	0	0	0	0	RN7SL837P	1	230894141	230894427	+	287	misc_RNA	RNA, 7SL, cytoplasmic 837, pseudogene [Source:HGNC Symbol;Acc:HGNC:46853]	-
ENSG00000207042	0.488038	0	0	0	0	0	0	1.40229	0	RNU6-196P	16	21642294	21642400	+	107	snRNA	RNA, U6 small nuclear 196, pseudogene [Source:HGNC Symbol;Acc:HGNC:47159]	-
ENSG00000186676	0	0.0778132	0	0.0446526	0	0	0.073486	0	0	EEF1GP1	7	125033453	125035301	+	1299	processed_pseudogene	eukaryotic translation elongation factor 1 gamma pseudogene 1 [Source:HGNC Symbol;Acc:HGNC:44556]	-
ENSG00000183385	0	0	0	0	0	0	0	0	0	TTTY8	Y	9691100	9693957	+	708	lincRNA	testis-specific transcript, Y-linked 8 [Source:HGNC Symbol;Acc:HGNC:18489]	-
ENSG00000276085	0.0561507	0	0	0	0	0.101249	0	0	0	CCL3L1	17	36194869	36196758	-	1469	protein_coding	C-C motif chemokine ligand 3 like 1 [Source:HGNC Symbol;Acc:HGNC:10628]	-
ENSG00000266517	0	0	0	0	0	0	0	0	0	MIR4715	15	25848747	25848825	-	79	miRNA	microRNA 4715 [Source:HGNC Symbol;Acc:HGNC:41666]	-
ENSG00000259340	0	0	0	0	0	0	0	0	0	AC110588.1	15	96551381	96551517	+	137	processed_pseudogene	CDC28 protein kinase regulatory subunit 2 (CKS2) pseudogene	-
ENSG00000270797	0	0	0	0	0	0	0	0	0	AC004987.4	7	39788967	39789304	-	338	processed_pseudogene	calmodulin 1 (phosphorylase kinase, delta) (CALM1) pseudogene	-
ENSG00000206615	0	0	0	0	0	0	0	0	0	RNU6-338P	22	31388733	31388837	-	105	snRNA	RNA, U6 small nuclear 338, pseudogene [Source:HGNC Symbol;Acc:HGNC:47301]	-
ENSG00000242650	0	0	0	0	0	0	0	0	0	RN7SL292P	7	51716657	51716922	+	266	misc_RNA	RNA, 7SL, cytoplasmic 292, pseudogene [Source:HGNC Symbol;Acc:HGNC:46308]	-
ENSG00000205452	0	0	0	0	0	0	0	0	0	AC140658.1	16	33964547	33976346	-	2586	processed_transcript	novel transcript	-
ENSG00000225165	0	0	0	0	0	0	0	0	0	AC090071.1	5	95440044	95440687	+	644	processed_pseudogene	chromosome 14 open reading frame 166 (C14orf166) pseudogene	-
ENSG00000237804	0	0	0	0	0	0	0	0	0	HNRNPA1P39	2	174310015	174310974	-	960	processed_pseudogene	heterogeneous nuclear ribonucleoprotein A1 pseudogene 39 [Source:HGNC Symbol;Acc:HGNC:48768]	-
ENSG00000238741	0	0	0	0.351538	0	0	0	0	0	SCARNA7	3	160514907	160515236	-	330	scaRNA	small Cajal body-specific RNA 7 [Source:HGNC Symbol;Acc:HGNC:32563]	-
ENSG00000204138	14.3694	14.2951	13.3159	10.5664	13.3952	11.489	12.5839	11.3729	11.8206	PHACTR4	1	28369582	28500369	+	7322	protein_coding	phosphatase and actin regulator 4 [Source:HGNC Symbol;Acc:HGNC:25793]	-
ENSG00000271205	0	0	0	0	0	0	0	0	0	Z83818.1	X	87723089	87723238	-	150	processed_pseudogene	zinc finger protein 486 (ZNF486) pseudogene	-
ENSG00000224210	0	0	0	0	0	0	0	0	0	TRIM60P5Y	Y	24494709	24495583	-	574	processed_pseudogene	tripartite motif containing 60 pseudogene 5, Y-linked [Source:HGNC Symbol;Acc:HGNC:38430]	-
ENSG00000135407	1.74191	1.32716	1.75574	0.987999	1.182	0.835361	1.4566	0.958414	1.55794	AVIL	12	57797376	57818704	-	5889	protein_coding	advillin [Source:HGNC Symbol;Acc:HGNC:14188]	-
ENSG00000085872	15.4017	14.4101	15.8775	16.1188	16.294	16.099	13.2636	13.6663	13.5307	CHERP	19	16517889	16542530	-	6113	protein_coding	calcium homeostasis endoplasmic reticulum protein [Source:HGNC Symbol;Acc:HGNC:16930]	-
ENSG00000223318	0	0	0	0	0	0	0	0	0	RNA5SP111	2	164895677	164895777	-	101	rRNA_pseudogene	RNA, 5S ribosomal pseudogene 111 [Source:HGNC Symbol;Acc:HGNC:42909]	-
ENSG00000186008	0	0	0	0	0	0	0	0	0	RPS4XP21	19	34092561	34093310	-	750	processed_pseudogene	ribosomal protein S4X pseudogene 21 [Source:HGNC Symbol;Acc:HGNC:36228]	-
ENSG00000258272	0	0	0	0	0	0.248448	0	0	0	AC007513.1	12	96422326	96485442	-	379	lincRNA	novel transcript	-
ENSG00000111424	10.1286	10.3912	11.0518	5.86792	6.13182	6.69893	10.7686	10.6473	10.5444	VDR	12	47841537	47943048	-	5674	protein_coding	vitamin D receptor [Source:HGNC Symbol;Acc:HGNC:12679]	THR-like
ENSG00000232859	2.05268	2.58261	2.19312	2.09762	2.31053	1.99872	1.95119	2.39852	1.99419	LYRM9	17	27878314	27894752	-	5380	protein_coding	LYR motif containing 9 [Source:HGNC Symbol;Acc:HGNC:27314]	-
ENSG00000233395	0	0	0	0	0	0	0	0	0	LINC00841	10	43939003	43944466	+	2126	lincRNA	long intergenic non-protein coding RNA 841 [Source:HGNC Symbol;Acc:HGNC:27430]	-
ENSG00000169507	0	0.121005	0.0420071	0.138876	0.195464	0.300597	0.114276	0	0.155725	SLC38A11	2	164896186	164955525	-	5552	protein_coding	solute carrier family 38 member 11 [Source:HGNC Symbol;Acc:HGNC:26836]	-
ENSG00000232685	0	0	0	0	0	0	0	0	0	LINC00442	13	19008259	19012559	+	2178	antisense	long intergenic non-protein coding RNA 442 [Source:HGNC Symbol;Acc:HGNC:42779]	-
ENSG00000199085	0	0	0	0	0	0	0	0	0	MIR148A	7	25949919	25949986	-	68	miRNA	microRNA 148a [Source:HGNC Symbol;Acc:HGNC:31535]	-
ENSG00000188580	0.0720774	0.069758	0	0	0.101415	0.0649841	0.0658788	0.103551	0.0673305	NKAIN2	6	123804141	124825657	+	4197	protein_coding	sodium/potassium transporting ATPase interacting 2 [Source:HGNC Symbol;Acc:HGNC:16443]	-
ENSG00000261403	0	0	0	0	0	0	0	0	0	AC104758.5	15	77954075	77963654	-	571	lincRNA	novel transcript	-
ENSG00000261391	0	0	0	0	0	0	0	0	0	AC138907.6	16	32715931	32716056	+	126	processed_pseudogene	glypican 5 (GPC5) pseudogene	-
ENSG00000206622	0.395607	0	0	0	0	0.356674	0	0.378901	0	SNORA69	X	119787353	119787484	-	132	snoRNA	small nucleolar RNA, H/ACA box 69 [Source:HGNC Symbol;Acc:HGNC:10226]	-
ENSG00000277475	0	0	0	0	0	0	0	0	0	AC213203.2	KI270713.1	31698	32528	-	831	protein_coding		-
ENSG00000207242	0	0	0	0	0	0	0	0	0	RNU6-1065P	17	10857899	10858004	-	106	snRNA	RNA, U6 small nuclear 1065, pseudogene [Source:HGNC Symbol;Acc:HGNC:48028]	-
ENSG00000147912	6.39159	6.00624	5.58695	5.65603	5.44812	5.64302	5.74495	6.68052	5.94587	FBXO10	9	37510892	37576349	-	5997	protein_coding	F-box protein 10 [Source:HGNC Symbol;Acc:HGNC:13589]	-
ENSG00000240823	0.189891	0	0.382799	0.210923	0.178121	0	0.173561	0	0	RN7SL23P	11	61444149	61444423	+	275	misc_RNA	RNA, 7SL, cytoplasmic 23, pseudogene [Source:HGNC Symbol;Acc:HGNC:46039]	-
ENSG00000104522	60.4839	59.9556	60.6099	68.7452	68.5546	67.7944	55.3894	68.8197	64.658	TSTA3	8	143612618	143618048	-	3622	protein_coding	tissue specific transplantation antigen P35B [Source:HGNC Symbol;Acc:HGNC:12390]	-
ENSG00000244564	5.82277	4.47253	2.98109	9.54752	6.6756	7.99959	4.56173	3.62941	3.53986	AC096888.1	3	64445231	64454832	+	565	lincRNA	uncharacterized LOC101929316 [Source:NCBI gene;Acc:101929316]	-
ENSG00000253634	0	0	0	0	0	0	0	0	0	AC091096.1	8	92460539	92655569	-	2016	lincRNA	uncharacterized LOC102724710 [Source:NCBI gene;Acc:102724710]	-
ENSG00000143954	0	0	0	0	0	0	0	0	0	REG3G	2	79025686	79028505	+	1845	protein_coding	regenerating family member 3 gamma [Source:HGNC Symbol;Acc:HGNC:29595]	-
ENSG00000253917	0	0	0	0	0	0	0	0	0	AC226119.1	4	3915183	3955419	-	682	processed_transcript	novel transcript	-
ENSG00000154040	2.00658	1.13679	2.12118	1.25032	1.33132	1.41199	2.10241	2.71872	1.82871	CABYR	18	24138956	24161603	+	3518	protein_coding	calcium binding tyrosine phosphorylation regulated [Source:HGNC Symbol;Acc:HGNC:15569]	-
ENSG00000267089	0.118145	0	0	0	0	0	0	0	0	AC008543.4	19	11841241	11842439	-	442	lincRNA	novel transcript	-
ENSG00000283506	0	0	0	0	0	0	0	0	0	MIR7157	2	140586626	140586685	-	60	miRNA	microRNA 7157 [Source:HGNC Symbol;Acc:HGNC:50010]	-
ENSG00000248537	0	0.258515	0.134616	0	0	0	0	0.383747	0	AC091906.1	5	9363275	9422481	+	391	antisense	novel transcript	-
ENSG00000049540	0.061653	0.179007	0.155357	0.102722	0.0578315	0.277928	0.253579	0.0885744	0.0863889	ELN	7	74027789	74069907	+	6542	protein_coding	elastin [Source:HGNC Symbol;Acc:HGNC:3327]	-
ENSG00000248279	0	0	0	0	0	0	0	0	0	LINC02120	5	32947443	32962467	+	2008	lincRNA	long intergenic non-protein coding RNA 2120 [Source:HGNC Symbol;Acc:HGNC:27971]	-
ENSG00000223912	0	0	0	0	0	0	0	0	0	EEF1A1P36	6	132271982	132273332	+	1351	processed_pseudogene	eukaryotic translation elongation factor 1 alpha 1 pseudogene 36 [Source:HGNC Symbol;Acc:HGNC:37914]	-
ENSG00000141194	0	0	0	0	0	0	0	0	0	OR4D1	17	58148449	58159555	+	4927	protein_coding	olfactory receptor family 4 subfamily D member 1 [Source:HGNC Symbol;Acc:HGNC:8293]	-
ENSG00000201690	0	0	0	0	0	0	0	0	0	RNY1P2	13	102016953	102017069	-	117	misc_RNA	RNA, Ro-associated Y1 pseudogene 2 [Source:HGNC Symbol;Acc:HGNC:42479]	-
ENSG00000164610	11.6457	12.3478	13.383	14.4185	18.7862	18.4579	13.017	12.4327	13.7196	RP9	7	33094797	33109401	-	1898	protein_coding	RP9, pre-mRNA splicing factor [Source:HGNC Symbol;Acc:HGNC:10288]	-
ENSG00000267655	0.29255	0.566271	0.44231	0.324951	0.617436	0.659397	0.334238	0.140098	1.09313	AC125437.1	18	79117207	79117920	+	714	sense_intronic	novel transcript, sense intronic to ATP9B	-
ENSG00000270306	0	0	0	0	0	0	0	0	0	AL158050.2	6	51385282	51385849	-	568	processed_pseudogene	TIA1 cytotoxic granule-associated RNA binding protein (TIA1)	-
ENSG00000075643	8.34951	7.51348	5.50942	3.11489	3.13576	3.72819	7.35632	6.176	6.30482	MOCOS	18	36187519	36272157	+	6281	protein_coding	molybdenum cofactor sulfurase [Source:HGNC Symbol;Acc:HGNC:18234]	-
ENSG00000130427	0	0	0	0	0	0	0	0	0	EPO	7	100720800	100723700	+	1330	protein_coding	erythropoietin [Source:HGNC Symbol;Acc:HGNC:3415]	-
ENSG00000217624	0.213143	0.137523	0.501285	0.394583	0.0666439	0.192167	0.324688	0.408286	0.0663686	AL627402.1	X	41675760	41676494	-	735	processed_pseudogene	tyrosine 3-monooxygenase/tryptophan 5-monooxygenase activation protein, zeta polypeptide (YWHAZ) pseudogene	-
ENSG00000205890	0.0511795	0	0	0	0	0	0	0	0	AC108134.1	16	3032481	3039133	+	3061	antisense	uncharacterized LOC100128770 [Source:NCBI gene;Acc:100128770]	-
ENSG00000243477	4.48516	4.87236	4.47466	5.43944	5.10869	5.4467	4.05761	4.42727	4.14702	NAA80	3	50296402	50299421	-	2188	protein_coding	N(alpha)-acetyltransferase 80, NatH catalytic subunit [Source:HGNC Symbol;Acc:HGNC:30252]	-
ENSG00000249580	0	0	0	0	0	0	0	0	0	MTATP6P22	3	106897671	106898268	-	598	unprocessed_pseudogene	MT-ATP6 pseudogene 22 [Source:HGNC Symbol;Acc:HGNC:52178]	-
ENSG00000271079	0	0	0	0.0448425	0	0.0181991	0	0	0	CTAGE15	7	143571801	143574387	+	2587	protein_coding	CTAGE family member 15 [Source:HGNC Symbol;Acc:HGNC:37295]	-
ENSG00000144909	5.04632	3.82273	5.31247	5.63291	5.61011	5.88652	4.52123	4.37974	4.49283	OSBPL11	3	125528858	125595090	-	4191	protein_coding	oxysterol binding protein like 11 [Source:HGNC Symbol;Acc:HGNC:16397]	-
ENSG00000261266	0.0814666	0	0	0	0	0	0	0	0	AC008870.3	16	23687049	23687689	-	641	antisense	novel transcript	-
ENSG00000176222	2.35389	2.06785	1.86157	1.44808	1.69845	1.63249	1.85356	1.94233	1.89441	ZNF404	19	43872363	43901385	-	2479	protein_coding	zinc finger protein 404 [Source:HGNC Symbol;Acc:HGNC:19417]	zf-C2H2
ENSG00000273377	0	0	0	0	0	0	0	0	0	OR2Q1P	7	143980905	143981820	+	916	unprocessed_pseudogene	olfactory receptor family 2 subfamily Q member 1 pseudogene [Source:HGNC Symbol;Acc:HGNC:8273]	-
ENSG00000250198	0	0	0	0	0	0	0	0	0	LINC02199	5	8839732	8881525	+	3543	lincRNA	long intergenic non-protein coding RNA 2199 [Source:HGNC Symbol;Acc:HGNC:53065]	-
ENSG00000280991	0	0	0	0	0	0	0	0	0	AL121956.5	6	166229334	166229554	+	221	unprocessed_pseudogene	heterogeneous nuclear ribonucleoprotein D (AU-rich element RNA binding protein 1, 37kDa) (HNRNPD) pseudogene	-
ENSG00000232774	0.176867	0.21397	0.267409	0	0	0.0398653	0	0.0423497	0.0826096	FLJ22447	14	61570540	61658696	+	2653	lincRNA	uncharacterized LOC400221 [Source:NCBI gene;Acc:400221]	-
ENSG00000235795	0.0778243	0.0753199	0.0784425	0.0864438	0	0	0	0	0.290795	AC093157.2	1	100995473	100996260	+	671	antisense	novel transcript	-
ENSG00000207298	0	0	0	0	0	0	0	0	0	RNU6-83P	13	99025234	99025345	+	112	snRNA	RNA, U6 small nuclear 83, pseudogene [Source:HGNC Symbol;Acc:HGNC:42573]	-
ENSG00000204479	0	0	0	0	0	0	0	0	0	PRAMEF17	1	13389632	13392629	+	1578	protein_coding	PRAME family member 17 [Source:HGNC Symbol;Acc:HGNC:29485]	-
ENSG00000105270	88.2023	80.0312	85.2425	87.6316	89.7831	90.7371	82.4101	77.1214	78.4161	CLIP3	19	36014660	36033343	-	3772	protein_coding	CAP-Gly domain containing linker protein 3 [Source:HGNC Symbol;Acc:HGNC:24314]	-
ENSG00000118965	2.25946	1.61629	1.81061	2.05765	2.13257	2.07505	2.06514	2.05652	1.73047	WDR35	2	19910260	19990131	-	7836	protein_coding	WD repeat domain 35 [Source:HGNC Symbol;Acc:HGNC:29250]	-
ENSG00000259429	1.91793	1.60309	1.49381	0.871509	0.735976	0.864592	1.51395	0.834975	1.05868	UBE2Q2P2	15	82355142	82420075	+	1855	transcribed_unprocessed_pseudogene	ubiquitin conjugating enzyme E2 Q2 pseudogene 2 [Source:HGNC Symbol;Acc:HGNC:37440]	-
ENSG00000260597	1.55881	1.45207	1.49263	1.45009	1.73635	1.66891	1.69189	0.858466	1.18312	AC012531.1	12	54019910	54022589	+	2680	lincRNA	novel transcript	-
ENSG00000064666	356.286	342.117	351.395	303.357	297.455	316.007	312.3	334.592	349.069	CNN2	19	1026581	1039068	+	3645	protein_coding	calponin 2 [Source:HGNC Symbol;Acc:HGNC:2156]	-
ENSG00000260425	0.360139	0.232366	0.242	0.533368	0.337816	0.108232	0.438889	0.229954	0.22428	AL031709.1	16	1358900	1361405	-	435	antisense	novel transcript, antisense to GNPTG	-
ENSG00000181031	4.54088	4.72436	5.14907	6.24171	6.28264	6.90862	4.15036	5.16459	5.62041	RPH3AL	17	212389	386254	-	6066	protein_coding	rabphilin 3A like (without C2 domains) [Source:HGNC Symbol;Acc:HGNC:10296]	-
ENSG00000280924	0	0	0	0	0	0	0	0	0	LINC00628	1	204368431	204369719	-	1289	lincRNA	long intergenic non-protein coding RNA 628 [Source:HGNC Symbol;Acc:HGNC:27008]	-
ENSG00000100403	23.5299	22.7184	25.6485	27.4339	29.2356	27.9317	22.1301	22.3304	21.1681	ZC3H7B	22	41301522	41360147	+	10525	protein_coding	zinc finger CCCH-type containing 7B [Source:HGNC Symbol;Acc:HGNC:30869]	-
ENSG00000233874	0	0	0	0	0	0	0	0	0	AL118496.1	X	109568478	109570289	+	1812	processed_pseudogene	mitofusin 1 (MFN1) pseudogene	-
ENSG00000254031	0	0	0	0	0	0	0	0	0	AC022858.1	8	71155457	71204223	+	977	antisense	novel transcript	-
ENSG00000211674	0	0	0	0	0	0	0	0	0	IGLJ1	22	22893692	22893818	+	127	IG_J_gene	immunoglobulin lambda joining 1 [Source:HGNC Symbol;Acc:HGNC:5863]	-
ENSG00000105605	5.50145	5.78924	5.67718	3.78285	3.31743	3.81844	5.66684	6.60733	6.03644	CACNG7	19	53909335	53943941	+	2800	protein_coding	calcium voltage-gated channel auxiliary subunit gamma 7 [Source:HGNC Symbol;Acc:HGNC:13626]	-
ENSG00000227762	0	0	0	0	0	0	0	0	0	GUSBP8	5	99532628	99534611	+	679	unprocessed_pseudogene	glucuronidase, beta pseudogene 8 [Source:HGNC Symbol;Acc:HGNC:42322]	-
ENSG00000131477	0.183228	0.177332	0.092342	0	0.257807	0.330393	0.167471	0.526474	0.0855806	RAMP2	17	42758447	42763041	+	1148	protein_coding	receptor activity modifying protein 2 [Source:HGNC Symbol;Acc:HGNC:9844]	-
ENSG00000243738	2.07372	1.45963	0.570053	2.9316	3.71354	1.52971	1.37846	0.361119	0.528313	RN7SL181P	9	121203159	121203435	+	277	misc_RNA	RNA, 7SL, cytoplasmic 181, pseudogene [Source:HGNC Symbol;Acc:HGNC:46197]	-
ENSG00000251018	0	0	0	0	0	0	0	0	0	HMMR-AS1	5	163483065	163494058	-	957	antisense	HMMR antisense RNA 1 [Source:HGNC Symbol;Acc:HGNC:49149]	-
ENSG00000255331	0	0	0	0	0	0	0	0	0	AP000790.1	11	60077350	60078401	+	737	processed_pseudogene	tyrosine 3-monooxygenase/tryptophan 5-monooxygenase activation protein, zeta polypeptide (YWHAZ) pseudogene	-
ENSG00000092010	58.0755	53.4888	49.2624	36.5676	39.1754	36.3073	55.4838	51.274	47.3298	PSME1	14	24136158	24138967	+	1781	protein_coding	proteasome activator subunit 1 [Source:HGNC Symbol;Acc:HGNC:9568]	-
ENSG00000274617	0	0	0	0	0	0	0	0	0	RF02171	22	32362972	32363059	+	88	misc_RNA		-
ENSG00000237202	0	0	0	0	0	0	0	0	0	AJ239321.1	21	13120244	13120807	+	564	processed_pseudogene	BCL2/adenovirus E1B 19kDa interacting protein 3 (BNIP3) pseudogene	-
ENSG00000253790	0	0	0	0	0	0	0	0	0	AC007991.1	8	39997869	39998499	-	631	processed_pseudogene	nuclear transcription factor Y, beta (NFYB) pseudogene	-
ENSG00000256394	0	0.0597395	0.0622162	0.171406	0.0289499	0	0	0.0591194	0	ASIC5	4	155829729	155866273	-	1692	protein_coding	acid sensing ion channel subunit family member 5 [Source:HGNC Symbol;Acc:HGNC:17537]	-
ENSG00000141837	5.35156	4.47782	4.01058	3.51175	3.45747	3.69862	4.07375	4.01774	3.472	CACNA1A	19	13206442	13633025	-	43159	protein_coding	calcium voltage-gated channel subunit alpha1 A [Source:HGNC Symbol;Acc:HGNC:1388]	-
ENSG00000253362	0	0	0	0	0	0	0	0	0	AC012400.1	8	84163449	84164564	-	381	unprocessed_pseudogene	tropomyosin 3 (TPM3) pseudogene	-
ENSG00000267303	0	0	0.0853539	0	0	0	0	0	0	AC011511.4	19	10315471	10320678	-	1850	protein_coding	novel transcript	-
ENSG00000138160	0.48352	0.488758	0.92057	3.54467	3.46713	3.30342	0.441937	0.380773	0.582159	KIF11	10	92593286	92655395	+	4860	protein_coding	kinesin family member 11 [Source:HGNC Symbol;Acc:HGNC:6388]	-
ENSG00000219294	0	0	0	0	0	0	0	0	0	PIP5K1P1	6	7986537	7988192	+	1656	processed_pseudogene	phosphatidylinositol-4-phosphate 5-kinase type 1 pseudogene 1 [Source:HGNC Symbol;Acc:HGNC:28372]	-
ENSG00000230735	0	0	0.120446	0.132732	0	0	0.10922	0.114451	0	AC093423.2	1	89629725	89676386	+	437	sense_intronic	novel transcript	-
ENSG00000229305	0	0	0	0	0	0	0	0	0	AL358876.1	1	8189824	8192770	+	1075	processed_pseudogene	52kDa eukaryotic translation initiation factor 2 subunit 3 gamma (EIF2S3) pseudogene	-
ENSG00000264885	1.85178	1.24074	1.95263	0.949325	1.33615	0.847611	1.8748	1.17329	1.54353	AC026271.3	17	18667629	18669461	-	1833	sense_intronic	novel transcript	-
ENSG00000278902	0	0	0	0	0	0	0	0	0	AC010947.1	18	73921939	73922631	-	693	TEC	TEC	-
ENSG00000235411	0	0	0.0455714	0	0	0	0.041324	0	0	AC007041.1	2	20239892	20241046	-	1155	processed_pseudogene	developmentally regulated GTP binding protein 1 (DRG1) pseudogene	-
ENSG00000213700	3.53873	2.86947	2.98843	1.80598	1.52512	1.37966	4.63305	2.93128	3.75238	RPL17P50	10	73005833	73006595	-	546	processed_pseudogene	ribosomal protein L17 pseudogene 50 [Source:HGNC Symbol;Acc:HGNC:45098]	-
ENSG00000267053	0.185672	0	0.0467866	0.154677	0.0435407	0.0836995	0.0424259	0.0444578	0	AC012617.1	19	36304580	36312668	+	2674	lincRNA	uncharacterized LOC100134317 [Source:NCBI gene;Acc:100134317]	-
ENSG00000283210	0	0	0	0	0	0	0	0	0	MIR1322	8	10825373	10825443	-	71	miRNA	microRNA 1322 [Source:HGNC Symbol;Acc:HGNC:35374]	-
ENSG00000136014	0.0597143	0.173378	0.0902829	0.198984	0.224052	0.242269	0.136447	0.171578	0.139454	USP44	12	95516560	95551490	-	5386	protein_coding	ubiquitin specific peptidase 44 [Source:HGNC Symbol;Acc:HGNC:20064]	-
ENSG00000231063	0	0	0	0	0.116766	0	0	0	0	AC006994.1	2	210088226	210089064	+	839	processed_pseudogene	ribosomal protein L6 (RPL6) pseudogene	-
ENSG00000197635	541.64	550.874	476.911	271.264	251.87	271.495	577.945	537.503	564.02	DPP4	2	161992241	162074542	-	5009	protein_coding	dipeptidyl peptidase 4 [Source:HGNC Symbol;Acc:HGNC:3009]	-
ENSG00000237521	0	0	0	0	0	0	0	0	0	OR7E24	19	9247344	9252625	+	1870	protein_coding	olfactory receptor family 7 subfamily E member 24 [Source:HGNC Symbol;Acc:HGNC:8396]	-
ENSG00000127362	0.426867	0	0.0956129	0	0	0	0.0433508	0.0454269	0	TAS2R3	7	141764097	141765197	+	1101	protein_coding	taste 2 receptor member 3 [Source:HGNC Symbol;Acc:HGNC:14910]	-
ENSG00000219240	0	0	0	0	0	0	0	0	0	AL353692.2	6	89886156	89887848	+	1396	processed_pseudogene	G protein pathway suppressor 1 (GPS1) pseudogene	-
ENSG00000265965	0	0	0	0	0	0	0	0	0	MIR4266	2	109313571	109313625	-	55	miRNA	microRNA 4266 [Source:HGNC Symbol;Acc:HGNC:38175]	-
ENSG00000130950	0	0	0	0	0	0	0	0.0196987	0.0384253	NUTM2F	9	94318196	94328644	-	2561	protein_coding	NUT family member 2F [Source:HGNC Symbol;Acc:HGNC:23450]	-
ENSG00000225448	0	0	0	0	0	0	0	0	0	AC009477.1	2	131181153	131181369	-	217	processed_pseudogene	nitric oxide synthase 2A (NOS2) pseudogene	-
ENSG00000259841	0	0	0	0	0	0	0	0	0	LINC01566	16	35363412	35390584	+	2961	lincRNA	long intergenic non-protein coding RNA 1566 [Source:HGNC Symbol;Acc:HGNC:27555]	-
ENSG00000230623	0.0548531	0	0	0	0	0	0.300814	0	0.0512405	AC104461.1	1	200333193	200478360	+	3344	processed_transcript	novel transcript, antisense to ZNF281	-
ENSG00000118960	31.9259	31.6084	30.067	29.9912	31.9456	29.9806	27.8394	31.5479	31.3895	HS1BP3	2	20560448	20651089	-	9059	protein_coding	HCLS1 binding protein 3 [Source:HGNC Symbol;Acc:HGNC:24979]	-
ENSG00000170088	10.812	10.6271	13.0436	15.2958	14.1354	14.9635	9.97014	11.1388	11.3245	TMEM192	4	165070608	165208549	-	10241	protein_coding	transmembrane protein 192 [Source:HGNC Symbol;Acc:HGNC:26775]	-
ENSG00000270665	0	0	0	0	0	0	0	0	0	HNRNPA1P67	4	72807267	72808192	+	926	processed_pseudogene	heterogeneous nuclear ribonucleoprotein A1 pseudogene 67 [Source:HGNC Symbol;Acc:HGNC:48797]	-
ENSG00000251261	0	0	0	0	0	0	0	0	0	OR7H2P	5	101816475	101816780	-	306	unprocessed_pseudogene	olfactory receptor family 7 subfamily H member 2 pseudogene [Source:HGNC Symbol;Acc:HGNC:31314]	-
ENSG00000257572	0	0	0	0	0	0	0	0	0	AC008127.2	12	45071769	45072843	+	1075	processed_pseudogene	Sjogren syndrome antigen B (autoantigen La) (SSB) pseudogene	-
ENSG00000178802	19.1419	18.9226	21.5663	20.7612	22.0694	22.7275	21.3545	21.3565	21.7485	MPI	15	74890005	74902219	+	9090	protein_coding	mannose phosphate isomerase [Source:HGNC Symbol;Acc:HGNC:7216]	-
ENSG00000203307	0	0	0	0	0	0	0	0	0	AL626787.1	1	166081183	166087483	+	594	antisense	novel transcript	-
ENSG00000221947	0.251815	0.15232	0.222088	0.0699262	0.177155	0.170275	0.201389	0.180886	0.117615	XKR9	8	70669365	70790371	+	3905	protein_coding	XK related 9 [Source:HGNC Symbol;Acc:HGNC:20937]	-
ENSG00000230183	1.21442	1.17534	1.22407	0.595114	1.10564	0.51525	0.979395	1.0263	1.43473	CNOT6LP1	15	56005715	56007176	-	1462	processed_pseudogene	CCR4-NOT transcription complex subunit 6-like pseudogene 1 [Source:HGNC Symbol;Acc:HGNC:32355]	-
ENSG00000249286	0	0.0508447	0.0529526	0.0583539	0.049279	0.142095	0.0480173	0	0.0981508	AMD1P3	5	43586918	43588223	-	994	processed_pseudogene	adenosylmethionine decarboxylase 1 pseudogene 3 [Source:HGNC Symbol;Acc:HGNC:51608]	-
ENSG00000176555	0	0	0	0	0	0	0	0	0	OR4S1	11	48306223	48307152	+	930	protein_coding	olfactory receptor family 4 subfamily S member 1 [Source:HGNC Symbol;Acc:HGNC:14705]	-
ENSG00000171552	43.5105	42.9823	42.1912	49.2886	53.209	52.1241	38.8765	46.3115	43.731	BCL2L1	20	31664452	31723989	-	3314	protein_coding	BCL2 like 1 [Source:HGNC Symbol;Acc:HGNC:992]	-
ENSG00000163069	78.3577	87.6056	86.9391	93.4539	95.1793	92.5743	85.3241	83.9029	87.2814	SGCB	4	52020706	52038482	-	4541	protein_coding	sarcoglycan beta [Source:HGNC Symbol;Acc:HGNC:10806]	-
ENSG00000147853	33.1825	32.3391	34.8251	31.9381	29.8641	33.471	32.8297	37.4446	35.1994	AK3	9	4709559	4742043	-	4483	protein_coding	adenylate kinase 3 [Source:HGNC Symbol;Acc:HGNC:17376]	-
ENSG00000225276	0	0	0	0	0	0	0	0	0	MTND1P18	10	37600796	37601368	-	573	processed_pseudogene	MT-ND1 pseudogene 18 [Source:HGNC Symbol;Acc:HGNC:42067]	-
ENSG00000225580	0.620613	0.471932	0.357453	0.886305	0.457399	0.719403	0.243103	0.551948	0.37269	AL358942.1	6	112616703	112617880	-	1178	processed_pseudogene	proliferation-associated 2G4, 38kD (PA2G4) pseudogene	-
ENSG00000126775	4.60635	5.03682	4.45321	4.42777	3.63532	4.02324	5.01986	4.35881	4.31333	ATG14	14	55366392	55411858	-	5052	protein_coding	autophagy related 14 [Source:HGNC Symbol;Acc:HGNC:19962]	-
ENSG00000219755	0.700941	0.8819	0.353255	0.622859	0.460246	0.568763	0.768792	0.335671	0.982167	AL137784.1	6	99575712	99576456	+	745	processed_pseudogene	40S ribososmal protein 3 (RPS3) pseudogene	-
ENSG00000225056	0	0	0	0	0	0	0	0	0	AL121894.1	20	23655225	23656390	-	436	lincRNA	novel transcript	-
ENSG00000255418	0	0	0	0	0	0	0.0798147	0	0	AC090092.1	11	23164900	23203161	+	930	lincRNA	novel transcript	-
ENSG00000284839	0	0	0	0	0	0	0	0	0	AC018637.1	7	32427901	32431804	+	687	lincRNA	novel transcript	-
ENSG00000261221	10.9174	13.3738	11.1836	11.7308	13.9407	12.2521	11.0484	11.7969	11.2919	ZNF865	19	55605405	55617269	+	4005	protein_coding	zinc finger protein 865 [Source:HGNC Symbol;Acc:HGNC:38705]	zf-C2H2
ENSG00000279693	0	0	0	0	0	0	0	0	0	AC099521.2	16	68367325	68370262	-	2938	TEC	novel transcript	-
ENSG00000276926	0	0.70194	1.46208	0	0	0	0.662905	0	0	MIR6797	19	41869627	41869698	+	72	miRNA	microRNA 6797 [Source:HGNC Symbol;Acc:HGNC:50169]	-
ENSG00000253294	0	0	0	0	0	0	0	0	0	IGHVII-40-1	14	106440950	106441007	-	58	IG_V_pseudogene	immunoglobulin heavy variable (II)-40-1 (pseudogene) [Source:HGNC Symbol;Acc:HGNC:5679]	-
ENSG00000031003	30.819	26.3922	30.9576	31.8123	31.8754	29.5286	24.6355	25.2094	27.1479	FAM13B	5	137937960	138051961	-	6808	protein_coding	family with sequence similarity 13 member B [Source:HGNC Symbol;Acc:HGNC:1335]	-
ENSG00000273965	0	0.344981	0	0	0	0	0	0	0	AC243654.1	17	37407936	37408594	-	293	antisense	novel transcript, antisense TADA2A	-
ENSG00000171148	48.4651	51.4944	46.8935	54.0803	54.1174	51.9009	49.2416	52.6666	49.5538	TADA3	3	9779860	9793011	-	4234	protein_coding	transcriptional adaptor 3 [Source:HGNC Symbol;Acc:HGNC:19422]	-
ENSG00000132541	12.9697	14.4021	15.068	14.8611	13.5104	14.2781	14.4747	16.214	12.6257	RIDA	8	98102344	98117241	-	1567	protein_coding	reactive intermediate imine deaminase A homolog [Source:HGNC Symbol;Acc:HGNC:16897]	-
ENSG00000232260	0	0	0	0	0	0	0	0	0	BTF3L4P1	21	17518526	17518993	-	468	processed_pseudogene	basic transcription factor 3 like 4 pseudogene 1 [Source:HGNC Symbol;Acc:HGNC:39645]	-
ENSG00000278068	0	0	0	0	0	0	0	0	0	AL136317.3	9	66029264	66030169	+	906	processed_pseudogene	calponin 2 (CNN2) pseudogene	-
ENSG00000261227	0	0	0	0	0	0	0	0	0	AC140912.1	16	73232055	73233970	+	1141	lincRNA	novel transcript	-
ENSG00000259013	0	0	0	0	0	0	0	0	0	AL118558.2	14	101969364	101969601	-	238	processed_pseudogene	NADH dehydrogenase (ubiquinone) 1 alpha subcomplex, 4, 9kDa (NDUFA4) pseudogene	-
ENSG00000274565	0.588268	0.613133	0.364887	0.301579	0.339572	0.20399	0.537677	0.476746	0.253627	AC080038.1	17	62626437	62627590	-	1154	antisense	novel transcript	-
ENSG00000231362	0	0	0	0	0	0	0	0	0	AC069271.1	3	13052967	13053122	-	156	processed_pseudogene	ribosomal protein L39 (RPL39) pseudogene	-
ENSG00000177599	1.09772	1.97302	2.00213	1.68379	1.32387	2.26215	0.955539	1.90247	2.34383	ZNF491	19	11797667	11809622	+	3032	protein_coding	zinc finger protein 491 [Source:HGNC Symbol;Acc:HGNC:23706]	zf-C2H2
ENSG00000199474	0	0	0	0	0	0	0	0	0	RF00443	16	12842487	12842610	-	124	snoRNA		-
ENSG00000265078	0	0	0	0	0	0	0	0	0	RN7SL664P	3	48094801	48095105	-	305	misc_RNA	RNA, 7SL, cytoplasmic 664, pseudogene [Source:HGNC Symbol;Acc:HGNC:46680]	-
ENSG00000248514	0	0	0	0	0	0	0	0.219364	0	AC008443.3	5	181205361	181206120	-	456	antisense	novel transcript	-
ENSG00000221345	0	0	0	0	0	0	0	0	0	RF00012	6	71126893	71127105	-	213	snoRNA		-
ENSG00000253607	0.0835522	0	0	0	0	0	0	0	0	AC104316.1	8	123002560	123030751	+	625	antisense	novel transcript, antisense to DERL1	-
ENSG00000248117	0	0	0	0	0	0	0	0	0	MINOS1P4	4	78379197	78379514	+	318	processed_pseudogene	mitochondrial inner membrane organizing system 1 pseudogene 4 [Source:HGNC Symbol;Acc:HGNC:44094]	-
ENSG00000204711	0	0	0	0	0	0	0	0	0	C9orf135	9	69820793	69906232	+	1279	protein_coding	chromosome 9 open reading frame 135 [Source:HGNC Symbol;Acc:HGNC:31422]	-
ENSG00000213090	0	0.0182784	0	0	0	0.0170275	0	0.0180886	0.0176423	AC007256.1	2	201410544	201413308	-	2765	processed_pseudogene	SCY1-like 2 (S. cerevisiae) (SCYL2) pseudogene	-
ENSG00000260442	0.67195	0.278711	0	1.91924	1.80086	0.692367	0.35095	1.19521	0.986379	ATP2A1-AS1	16	28878957	28879920	-	583	antisense	ATP2A1 antisense RNA 1 [Source:HGNC Symbol;Acc:HGNC:51370]	-
ENSG00000261745	0	0	0	0	0	0	0	0	0	AL512347.1	6	53125644	53126146	-	503	sense_overlapping	novel transcript, overlapping to GCM1	-
ENSG00000207628	0	0	0	0	0	0	0	0	0	MIR651	X	8126965	8127061	+	97	miRNA	microRNA 651 [Source:HGNC Symbol;Acc:HGNC:32907]	-
ENSG00000211772	5.85582	6.73417	7.70775	20.7375	18.4172	17.7019	3.6521	6.5323	5.21274	TRBC2	7	142801041	142802748	+	758	TR_C_gene	T cell receptor beta constant 2 [Source:HGNC Symbol;Acc:HGNC:12157]	-
ENSG00000170091	0	0	0	0	0	0	0	0	0	NSG2	5	174045604	174243501	+	3946	protein_coding	neuronal vesicle trafficking associated 2 [Source:HGNC Symbol;Acc:HGNC:24955]	-
ENSG00000225489	0.129686	0.0418375	0	0	0	0	0.0790218	0	0.201908	AL354707.1	9	6716495	6727438	+	2839	lincRNA	novel transcript	-
ENSG00000174353	1.04286	0.934535	1.129	1.32997	1.05068	1.3581	0.953172	1.36875	1.15458	STAG3L3	7	72969696	73005922	-	3644	transcribed_unprocessed_pseudogene	stromal antigen 3-like 3 (pseudogene) [Source:HGNC Symbol;Acc:HGNC:33845]	-
ENSG00000230665	0	0	0	0	0	0	0	0	0	THAP12P1	X	74396871	74399550	-	2203	processed_pseudogene	THAP domain containing 12 pseudogene 1 [Source:HGNC Symbol;Acc:HGNC:39563]	-
ENSG00000277156	0	0	0	0.110483	0	0	0	0	0	AL589743.5	14	19267115	19268164	+	1050	processed_pseudogene	translocase of outer mitochondrial membrane 40 homolog (yeast) (TOMM40) pseudogene	-
ENSG00000199883	0	0	0	0	0	0	0	0	0	RN7SKP90	11	16842253	16842587	+	335	misc_RNA	RNA, 7SK small nuclear pseudogene 90 [Source:HGNC Symbol;Acc:HGNC:45814]	-
ENSG00000266998	0.030547	0	0	0	0	0	0.01396	0	0	AC111182.1	17	77373818	77377236	-	3419	antisense	novel transcript, antisense to SEPT9	-
ENSG00000255330	0.0633432	0	0.0255385	0	0	0.0228437	0	0	0.0355029	AL096711.2	6	127438406	127519001	-	11464	protein_coding	novel transcript	-
ENSG00000242536	0	0	0	0	0	0	0	0	0	AC079943.2	3	158016216	158088997	-	835	lincRNA	novel transcript	-
ENSG00000227288	0.187057	0.0905188	0	0.242404	0.0584875	0.14054	0.0569901	0.0895791	0.116492	AL138799.1	1	81501794	81503468	+	1675	processed_pseudogene	dead ringer (Drosophila)-like 2 (bright and dead ringer) (DRIL2) pseudogene	-
ENSG00000274647	0	0	0	0	0	0	0	0	0	RF02110	12	91632912	91633023	-	112	misc_RNA		-
ENSG00000117155	2.33026	2.81372	3.37776	4.65904	4.55901	4.92219	3.04266	2.50819	2.46703	SSX2IP	1	84643707	84690803	-	8639	protein_coding	SSX family member 2 interacting protein [Source:HGNC Symbol;Acc:HGNC:16509]	-
ENSG00000236670	0	0.0782953	0.0815413	0.0449293	0.0379421	0.0364686	0	0.116224	0	KRT18P5	22	20482815	20484105	-	1291	processed_pseudogene	keratin 18 pseudogene 5 [Source:HGNC Symbol;Acc:HGNC:19259]	-
ENSG00000251143	0	0	0	0	0.0115718	0.0222447	0.022551	0	0	AP002490.1	11	72014291	72020910	+	4233	antisense	uncharacterized LOC100128494 [Source:NCBI gene;Acc:100128494]	-
ENSG00000234524	0	0	0	0	0	0	0	0	0	RPL12P43	X	118146063	118146561	+	499	processed_pseudogene	ribosomal protein L12 pseudogene 43 [Source:HGNC Symbol;Acc:HGNC:35840]	-
ENSG00000143178	0.459993	0.360392	0.529882	0.291965	0.452027	0.31598	0.440454	0.314692	0.45016	TBX19	1	168281040	168314426	+	3647	protein_coding	T-box 19 [Source:HGNC Symbol;Acc:HGNC:11596]	T-box
ENSG00000281710	0	0	0	0	0	0	0	0	0	RF00012	3	30304321	30304536	-	216	snoRNA		-
ENSG00000187546	0.104545	0	0.0526876	0	0.0490323	0	0	0	0	AGMO	7	15200318	15562015	-	3587	protein_coding	alkylglycerol monooxygenase [Source:HGNC Symbol;Acc:HGNC:33784]	-
ENSG00000260188	0	0	0	0	0	0	0	0	0	AC002464.1	6	110477907	110479436	+	1530	antisense	novel transcript, antisense to SLC22A16	-
ENSG00000087301	4.1262	3.96068	4.56806	3.64402	3.77527	3.47618	4.20412	4.11393	5.08661	TXNDC16	14	52430590	52552522	-	4739	protein_coding	thioredoxin domain containing 16 [Source:HGNC Symbol;Acc:HGNC:19965]	-
ENSG00000265537	0	0	0	0	0	0	0	0	0	MIR3180-1	16	14911220	14911313	+	94	miRNA	microRNA 3180-1 [Source:HGNC Symbol;Acc:HGNC:38382]	-
ENSG00000276160	0	0	0	0	0	0	0	0	0	GGTLC5P	22	18340145	18345899	+	998	unprocessed_pseudogene	gamma-glutamyltransferase light chain 5 pseudogene [Source:HGNC Symbol;Acc:HGNC:33427]	-
ENSG00000268078	0	0	0	0	0	0	0	0	0	AC135012.2	16	86158206	86158798	-	479	lincRNA	novel transcript	-
ENSG00000283522	0	0	0	0	0	0	0	0	0	MIR3150A	8	95072914	95072993	+	80	miRNA	microRNA 3150a [Source:HGNC Symbol;Acc:HGNC:38362]	-
ENSG00000156049	0.197305	0.190956	0.265163	0.0365263	0.185075	0	0.270505	0.346451	0.153592	GNA14	9	77423079	77648307	-	2721	protein_coding	G protein subunit alpha 14 [Source:HGNC Symbol;Acc:HGNC:4382]	-
ENSG00000260211	0.330376	0.0799362	0.1665	0.0458709	0.154949	0.111699	0.0377455	0.217542	0.0578659	AC139426.1	15	32313126	32315654	-	2529	processed_pseudogene	hyperpolarization activated cyclic nucleotide-gated potassium channel 2 (HCN2) pseudogene	-
ENSG00000249372	0	0	0	0	0	0	0	0	0	ATP6V1G1P6	5	78222184	78222517	+	334	processed_pseudogene	ATPase H+ transporting V1 subunit G1 pseudogene 6 [Source:HGNC Symbol;Acc:HGNC:37673]	-
ENSG00000278730	4.18333	3.56425	3.92825	2.48219	2.49863	2.4016	4.10134	3.61286	4.09152	AC005332.6	17	68126666	68129586	+	2921	lincRNA	novel transcript	-
ENSG00000139684	56.1128	57.4733	64.4475	81.7848	80.1368	84.6038	59.0086	67.7047	64.5642	ESD	13	46771256	46797232	-	3401	protein_coding	esterase D [Source:HGNC Symbol;Acc:HGNC:3465]	-
ENSG00000232710	0	0	0.0789129	0	0	0	0	0	0	AC254562.2	22	42136433	42139927	-	667	lincRNA	novel transcript	-
ENSG00000229398	0	0	0	0	0	0	0	0	0	AL031667.1	20	41382383	41383107	+	725	processed_pseudogene	novel pseudogene	-
ENSG00000232783	0	0	0	0	0	0	0	0	0	FRG2FP	3	198110112	198111878	+	1155	transcribed_unprocessed_pseudogene	FSHD region gene 2 family member F, pseudogene [Source:HGNC Symbol;Acc:HGNC:51366]	-
ENSG00000261586	0	0	0	0	0	0	0	0	0	AC068987.4	12	51817899	51820150	+	2094	lincRNA	novel transcript	-
ENSG00000285571	0	0	0	0	0	0.042263	0.0428449	0	0	AL513548.4	6	26677003	26683211	+	1114	lincRNA	novel transcript	-
ENSG00000225730	0	0	0	0	0	0	0	0	0	AL096772.1	6	46903471	46909078	+	781	antisense	uncharacterized LOC101926962 [Source:NCBI gene;Acc:101926962]	-
ENSG00000107249	8.90116	8.23184	7.57624	4.35761	3.67993	5.14205	8.25618	6.03085	7.20628	GLIS3	9	3824127	4348392	-	11826	protein_coding	GLIS family zinc finger 3 [Source:HGNC Symbol;Acc:HGNC:28510]	zf-C2H2
ENSG00000252919	0	0	0	0	0.480228	0	0.467933	0	0	RF00019	14	49592236	49592337	-	102	misc_RNA		-
ENSG00000218418	0.441496	0.28201	0.267002	0.32366	0.273326	0.358242	0.177552	0.312911	0.387674	AL591135.1	6	80064286	80070199	-	5914	processed_pseudogene	Rho GTPase activating protein 21 (ARHGAP21) pseudogene	-
ENSG00000229072	0	0	0	0	0	0	0	0	0	HMGN2P24	3	40699066	40699338	-	273	processed_pseudogene	high mobility group nucleosomal binding domain 2 pseudogene 24 [Source:HGNC Symbol;Acc:HGNC:39389]	-
ENSG00000229380	0.182588	0	0	0	0	0	0	0	0	AC147651.1	7	561958	565619	+	572	antisense	uncharacterized LOC101927000 [Source:NCBI gene;Acc:101927000]	-
ENSG00000258919	0	0	0	0	0	0	0	0	0	AL049836.1	14	101628984	101632530	-	539	lincRNA	novel transcript	-
ENSG00000130528	0	0	0	0	0.075301	0.0361883	0.11006	0	0	HRC	19	49151198	49155424	-	2685	protein_coding	histidine rich calcium binding protein [Source:HGNC Symbol;Acc:HGNC:5178]	-
ENSG00000285770	0	0	0	0	0	0	0	0	0	AC018653.4	12	7146482	7147817	-	724	antisense	novel transcript, antisense to CLSTN3	-
ENSG00000235641	0	0	0.129324	0	0.0802347	0.0771187	0	0.122887	0	LINC00484	9	91159573	91165658	+	3697	lincRNA	long intergenic non-protein coding RNA 484 [Source:HGNC Symbol;Acc:HGNC:27862]	-
ENSG00000274425	0.148511	0.0898323	0.0374226	0.288679	0.0870659	0.117158	0.0169674	0.12446	0.0173413	AC114271.1	19	10333436	10336248	+	2813	antisense	novel transcript, antisense to ICAM3	-
ENSG00000222561	0	0	0	0	0	0	0	0	0	RNU6-1025P	11	948421	948524	+	104	snRNA	RNA, U6 small nuclear 1025, pseudogene [Source:HGNC Symbol;Acc:HGNC:47988]	-
ENSG00000214338	0.0917108	0.0532557	0.0739514	0	0.0860262	0.0992222	0.0167647	0.0175676	0.0171342	SOGA3	6	127472794	127519191	-	4325	protein_coding	SOGA family member 3 [Source:HGNC Symbol;Acc:HGNC:21494]	-
ENSG00000247911	0	0	0.539845	0	0	0	0	0	0	HMGN1P12	5	71537652	71537846	-	195	processed_pseudogene	high mobility group nucleosome binding domain 1 pseudogene 12 [Source:HGNC Symbol;Acc:HGNC:39356]	-
ENSG00000261629	0	0	0	0	0	0	0	0	0	AC005692.2	7	141429711	141431268	-	596	antisense	novel transcript, antisense to novel TMEM gene	-
ENSG00000175287	0.347803	0.384698	0.801293	0.60708	0.51267	0.582352	0.363305	0.666232	0.510552	PHYHD1	9	128920895	128942041	+	2915	protein_coding	phytanoyl-CoA dioxygenase domain containing 1 [Source:HGNC Symbol;Acc:HGNC:23396]	-
ENSG00000196504	54.7345	54.137	56.9324	65.0468	65.7668	70.5393	48.7617	50.8875	52.151	PRPF40A	2	152651593	152717997	-	9536	protein_coding	pre-mRNA processing factor 40 homolog A [Source:HGNC Symbol;Acc:HGNC:16463]	-
ENSG00000272602	1.3579	1.62847	0.981884	1.44272	1.43987	1.88963	1.16018	0.93301	1.13059	ZNF595	4	53285	88211	+	3933	protein_coding	zinc finger protein 595 [Source:HGNC Symbol;Acc:HGNC:27196]	zf-C2H2
ENSG00000169126	0.979893	1.10642	1.15229	0.907017	0.651068	0.846647	0.634399	1.05583	1.64002	ARMC4	10	27812164	27999048	-	4773	protein_coding	armadillo repeat containing 4 [Source:HGNC Symbol;Acc:HGNC:25583]	-
ENSG00000221719	0	0	0	0	0	0	0	0	0	SNORA3C	16	2796408	2796532	-	125	snoRNA	small nucleolar RNA, H/ACA box 3C [Source:HGNC Symbol;Acc:HGNC:52203]	-
ENSG00000189077	32.8769	33.2245	36.5317	45.2444	39.5087	44.343	34.575	38.3174	32.8084	TMEM120A	7	75986837	75994659	-	1997	protein_coding	transmembrane protein 120A [Source:HGNC Symbol;Acc:HGNC:21697]	-
ENSG00000223343	0	0.0646287	0.134616	0.148347	0.0626385	0.0602058	0	0.0639578	0	AC137630.1	3	48985049	48989988	-	782	antisense	novel transcript	-
ENSG00000278618	0	0	0	0	0	0	0	0	0	MIR8069-2	21	13724189	13724274	+	86	miRNA	microRNA 8069-2 [Source:HGNC Symbol;Acc:HGNC:50836]	-
ENSG00000200737	0	0.447253	0	1.53992	1.30044	0.833291	0.422382	0	0.86338	RF00019	10	97421195	97421307	-	113	misc_RNA		-
ENSG00000249790	0	0.216351	0	0	0	0	0.0817281	0.0428211	0	AC092490.1	12	8788257	8795789	+	2279	lincRNA	novel transcript	-
ENSG00000250573	0	0	0	0	0	0	0	0	0	AC006499.4	4	10259445	10260138	-	694	processed_pseudogene	pseudogene similar to part of myxovirus (influenza virus) resistance 1, interferon-inducible protein p78 (mouse) (MX1)	-
ENSG00000272692	0	0	0	0.0306898	0	0	0	0.026463	0.02581	AC010997.3	10	75409157	75411842	+	1890	lincRNA	uncharacterized LOC101929234 [Source:NCBI gene;Acc:101929234]	-
ENSG00000272281	0	0.0357423	0	0	0	0.0332963	0	0	0.137994	TPTE2P2	13	52219344	52334277	-	6223	transcribed_unprocessed_pseudogene	transmembrane phosphoinositide 3-phosphatase and tensin homolog 2 pseudogene 2 [Source:HGNC Symbol;Acc:HGNC:38076]	-
ENSG00000258467	0	0	0	0	0	0	0	0	0	PHKBP2	14	36533506	36534538	-	708	unprocessed_pseudogene	phosphorylase kinase regulatory subunit beta pseudogene 2 [Source:HGNC Symbol;Acc:HGNC:8929]	-
ENSG00000119048	64.3703	67.1151	59.9309	66.0439	64.139	62.3473	71.3575	75.4558	71.2999	UBE2B	5	134371179	134391992	+	3291	protein_coding	ubiquitin conjugating enzyme E2 B [Source:HGNC Symbol;Acc:HGNC:12473]	-
ENSG00000254495	0.132538	0	0	0	0	0	0	0	0	AP000487.2	11	70358198	70358677	-	394	antisense	novel transcript	-
ENSG00000141644	37.8458	38.8623	38.9775	43.1975	43.8529	41.2082	37.0529	39.3013	34.5574	MBD1	18	50266882	50281774	-	6734	protein_coding	methyl-CpG binding domain protein 1 [Source:HGNC Symbol;Acc:HGNC:6916]	MBD
ENSG00000263189	0	0	0	0	0	0	0	0	0	AC023934.1	17	53952936	53955324	+	2389	processed_pseudogene	Zinc finger protein pseudogene	-
ENSG00000254804	0	0	0	0	0	0	0	0	0	AP006437.1	11	55684141	55686160	-	345	lincRNA	novel transcript	-
ENSG00000276430	0	0	0	0	0	0	0	0	0	FAM25C	10	47995355	47999791	-	319	protein_coding	family with sequence similarity 25 member C [Source:HGNC Symbol;Acc:HGNC:23586]	-
ENSG00000235748	0	0	0	0	0	0	0	0	0	SEPT14P12	1	197138748	197139307	-	560	processed_pseudogene	septin 14 pseudogene 12 [Source:HGNC Symbol;Acc:HGNC:51699]	-
ENSG00000211599	0	0	0	0	0	0	0	0	0	IGKV5-2	2	88897232	88897784	+	408	IG_V_gene	immunoglobulin kappa variable 5-2 [Source:HGNC Symbol;Acc:HGNC:5835]	-
ENSG00000252555	0	0	0	0	0	0	0	0	0	RNU6-567P	18	60018625	60018731	+	107	snRNA	RNA, U6 small nuclear 567, pseudogene [Source:HGNC Symbol;Acc:HGNC:47530]	-
ENSG00000119547	0.0378452	0.054941	0.0572188	0.0420368	0.0177497	0.0398075	0.0115302	0.0664531	0.047137	ONECUT2	18	57435685	57491297	+	16234	protein_coding	one cut homeobox 2 [Source:HGNC Symbol;Acc:HGNC:8139]	CUT
ENSG00000101076	0	0	0	0	0	0	0	0	0	HNF4A	20	44355700	44434596	+	7311	protein_coding	hepatocyte nuclear factor 4 alpha [Source:HGNC Symbol;Acc:HGNC:5024]	RXR-like
ENSG00000285733	0	0	0.0232898	0	0	0	0	0	0	AL031315.1	6	169419969	169702047	-	4233	protein_coding	novel protein	-
ENSG00000095739	26.2905	33.0483	27.7306	8.17172	8.98418	8.10964	35.448	26.7757	32.7022	BAMBI	10	28677342	28682939	+	2314	protein_coding	BMP and activin membrane bound inhibitor [Source:HGNC Symbol;Acc:HGNC:30251]	-
ENSG00000250869	0	0	0	0	0	0	0	0	0	AC087359.1	8	67133554	67135911	-	1740	unprocessed_pseudogene	tigger transposable element derived 1 (TIGD1) pseudogene	-
ENSG00000196220	0.272074	0.263319	0.3108	0.100736	0.08507	0.114473	0.348146	0.364819	0.271099	SRGAP3	3	8980591	9363053	-	18924	protein_coding	SLIT-ROBO Rho GTPase activating protein 3 [Source:HGNC Symbol;Acc:HGNC:19744]	-
ENSG00000251705	0	0	0	0	0	0	0	0	0	RNA5-8SP6	Y	10200155	10200306	+	152	rRNA_pseudogene	RNA, 5.8S ribosomal pseudogene 6 [Source:HGNC Symbol;Acc:HGNC:41960]	-
ENSG00000219891	1.05648	1.3633	1.77478	1.28525	1.4157	1.40608	1.28749	1.30097	0.986898	ZSCAN12P1	6	28091154	28093664	+	1657	transcribed_unprocessed_pseudogene	zinc finger and SCAN domain containing 12 pseudogene 1 [Source:HGNC Symbol;Acc:HGNC:13850]	-
ENSG00000212382	0	0	0	0	0	0	0	0	0	RNU6-159P	16	27863251	27863356	+	106	snRNA	RNA, U6 small nuclear 159, pseudogene [Source:HGNC Symbol;Acc:HGNC:47122]	-
ENSG00000253103	0	0	0	0	0	0	0	0	0	LINC01609	8	111098961	111236203	-	900	lincRNA	long intergenic non-protein coding RNA 1609 [Source:HGNC Symbol;Acc:HGNC:51663]	-
ENSG00000279619	0	0	0.0271875	0	0	0	0	0	0	AC020907.5	19	35137645	35139580	-	1936	TEC	novel transcript	-
ENSG00000275170	0	0	0	0	0	0	0	0	0	FRG2MP	21	14019060	14020725	-	856	processed_pseudogene	FSHD region gene 2 family member M, pseudogene [Source:HGNC Symbol;Acc:HGNC:51799]	-
ENSG00000138798	2.12061	3.11063	3.37318	2.31868	1.80268	2.65876	2.05938	2.28495	2.53809	EGF	4	109912884	110012266	+	6127	protein_coding	epidermal growth factor [Source:HGNC Symbol;Acc:HGNC:3229]	-
ENSG00000169488	0	0	0	0	0	0	0	0	0	OR4K15	14	19975444	19976659	+	1216	protein_coding	olfactory receptor family 4 subfamily K member 15 [Source:HGNC Symbol;Acc:HGNC:15353]	-
ENSG00000221739	0	0	0	0	0	0	0	0	0	MIR1203	17	48156427	48156511	-	85	miRNA	microRNA 1203 [Source:HGNC Symbol;Acc:HGNC:35269]	-
ENSG00000273782	0	0	0	0	0	0	0	0	0	RF02202	19	15834730	15834804	+	75	misc_RNA		-
ENSG00000279368	0	0	0.0286527	0	0	0	0.0259821	0	0.0265547	AL031123.3	6	6685148	6686984	+	1837	TEC	TEC	-
ENSG00000255973	0	0	0	0	0	0	0	0	0	AC137627.1	12	5583797	5584085	+	289	processed_pseudogene	dynein, light chain, roadblock-type 1 (DYNLRB1) pseudogene	-
ENSG00000201179	0	0	0	0	0	0	0	0	0	RNU6-1322P	7	105332790	105332896	+	107	snRNA	RNA, U6 small nuclear 1322, pseudogene [Source:HGNC Symbol;Acc:HGNC:48285]	-
ENSG00000201638	0	0	0	0	0	0	0	0	0	RNY4P16	1	234837976	234838069	+	94	misc_RNA	RNA, Ro-associated Y4 pseudogene 16 [Source:HGNC Symbol;Acc:HGNC:34066]	-
ENSG00000267289	0	0	0	0	0	0	0.190917	0	0	AC008752.2	19	9834079	9835013	-	750	lincRNA	uncharacterized LOC100996288 [Source:NCBI gene;Acc:100996288]	-
ENSG00000269903	0.361802	0	0.121559	0	0.113125	0.217464	0	0.231016	0	AC025165.4	12	57814494	57814926	+	433	lincRNA	novel transcript	-
ENSG00000258544	0	0	0	0	0	0	0	0	0	GLRXP2	14	90107675	90107995	+	321	processed_pseudogene	glutaredoxin pseudogene 2 [Source:HGNC Symbol;Acc:HGNC:18376]	-
ENSG00000249209	0	0	0	0	0	0	0	0	0	AP000311.1	21	33584687	33931607	-	1078	protein_coding	novel protein similar to ATP synthase delta (OSCP) subunit domain	-
ENSG00000175283	17.7149	15.5246	15.1609	18.6223	17.9996	18.7423	17.4246	17.3258	15.5212	DOLK	9	128945530	128947619	-	2090	protein_coding	dolichol kinase [Source:HGNC Symbol;Acc:HGNC:23406]	-
ENSG00000118160	0	0	0.057556	0	0	0	0.0260958	0	0	SLC8A2	19	47428017	47472168	-	5546	protein_coding	solute carrier family 8 member A2 [Source:HGNC Symbol;Acc:HGNC:11069]	-
ENSG00000282989	0	0	0	0	0	0	0	0	0	AP001206.1	8	101871830	101872549	-	720	processed_pseudogene	phosducin-like 3 (PDCL3) pseudogene	-
ENSG00000231237	0	0	0	0	0	0	0	0	0	OR6K1P	1	158694539	158695509	-	971	unprocessed_pseudogene	olfactory receptor family 6 subfamily K member 1 pseudogene [Source:HGNC Symbol;Acc:HGNC:15028]	-
ENSG00000275358	0	0.0802217	0	0	0	0	0	0	0	AL080312.2	20	25062962	25063591	-	630	lincRNA	novel transcript	-
ENSG00000134013	3507.92	3983.23	3092.63	2452.4	2387.07	2478.69	4036.85	3396.09	3599.23	LOXL2	8	23297189	23425328	-	5707	protein_coding	lysyl oxidase like 2 [Source:HGNC Symbol;Acc:HGNC:6666]	-
ENSG00000237412	0	0	0	0	0	0	0	0	0	PRSS56	2	232520463	232525716	+	2390	protein_coding	serine protease 56 [Source:HGNC Symbol;Acc:HGNC:39433]	-
ENSG00000285694	0	0	0.0291606	0	0	0.0521673	0	0.0277091	0	AL162718.2	6	4449392	4468181	+	1805	lincRNA	novel transcript	-
ENSG00000252376	0	0	0	0	0	0	0	0.423856	0	RNA5SP395	15	50463381	50463498	+	118	rRNA_pseudogene	RNA, 5S ribosomal pseudogene 395 [Source:HGNC Symbol;Acc:HGNC:43295]	-
ENSG00000176183	0	0	0	0	0	0	0	0	0	AC233964.1	5	98338744	98339832	+	1089	processed_pseudogene	actin, beta (ACTB) pseudogene	-
ENSG00000211633	0	0	0	0	0	0	0	0	0	IGKV1D-42	2	90190193	90190681	+	373	IG_V_gene	immunoglobulin kappa variable 1D-42 (non-functional) [Source:HGNC Symbol;Acc:HGNC:5757]	-
ENSG00000260115	0	0	0	0	0	0	0	0	0	AC012174.1	16	61918321	61940697	+	714	antisense	uncharacterized LOC105371305 [Source:NCBI gene;Acc:105371305]	-
ENSG00000055957	0	0	0	0	0	0	0	0	0	ITIH1	3	52777592	52792068	+	4544	protein_coding	inter-alpha-trypsin inhibitor heavy chain 1 [Source:HGNC Symbol;Acc:HGNC:6166]	-
ENSG00000258795	0	0	0	0	0	0	0	0	0	AL132719.1	14	98497132	98514798	+	423	lincRNA	novel transcript	-
ENSG00000213774	0	0	0	0	0	0	0	0	0	AC010904.1	2	7324748	7325062	-	315	processed_pseudogene	CDK2-associated protein 1 (CDK2AP1) pseudogene	-
ENSG00000269025	0	0	0	0	0	0	0	0	0	AC011467.4	19	22605739	22608211	+	607	transcribed_processed_pseudogene	testis expressed 264 (TEX264) pseudogene	-
ENSG00000270829	0	0	0	0	0	0	0	0	0	AC015849.2	17	35808489	35808897	-	409	lincRNA	novel transcript	-
ENSG00000223799	0.140629	0.113419	0.354364	0.156204	0.065956	0.126789	0.278492	0.179587	0.240839	IL10RB-DT	21	33263873	33266260	-	2228	antisense	IL10RB divergent transcript [Source:HGNC Symbol;Acc:HGNC:44303]	-
ENSG00000263125	0	0	0	0	0	0	0	0	0	ARL2BPP8	17	54754165	54754649	-	485	processed_pseudogene	ADP ribosylation factor like GTPase 2 binding protein pseudogene 8 [Source:HGNC Symbol;Acc:HGNC:39452]	-
ENSG00000235818	0	0	0	0	0	0	0	0	0	VN1R17P	1	247236868	247237957	-	1090	processed_pseudogene	vomeronasal 1 receptor 17 pseudogene [Source:HGNC Symbol;Acc:HGNC:37331]	-
ENSG00000262561	0	0	0	0	0	0	0	0	0	AC136932.1	16	34120470	34120677	+	208	processed_pseudogene	mitochondrial ribosomal protein 63 (MRP63) pseudogene	-
ENSG00000213149	0.114896	0.0555992	0.0579042	0	0.107774	0.155383	0.210029	0	0.160993	CNN2P9	6	110858239	110859147	+	909	processed_pseudogene	calponin 2 pseudogene 9 [Source:HGNC Symbol;Acc:HGNC:39534]	-
ENSG00000279245	0	0	0	0	0	0	0	0	0	FAM223A	X	154571248	154571960	+	713	lincRNA	family with sequence similarity 223 member A [Source:HGNC Symbol;Acc:HGNC:30612]	-
ENSG00000018280	0.303018	0.195511	0.101808	0.336579	0.189491	0.182131	0.276958	0.193482	0.188708	SLC11A1	2	218382029	218396894	+	8676	protein_coding	solute carrier family 11 member 1 [Source:HGNC Symbol;Acc:HGNC:10907]	-
ENSG00000273784	0.228368	0.294692	0.0767273	0.0845536	0.142808	0.137262	0.208728	0.145816	0.142218	AL137058.2	13	52600042	52642542	+	985	processed_transcript	novel transcript	-
ENSG00000151655	0.0363144	0.0702916	0.183014	0.0403364	0.238444	0.0327406	0.0331914	0.278248	0.135691	ITIH2	10	7703269	7749520	+	3378	protein_coding	inter-alpha-trypsin inhibitor heavy chain 2 [Source:HGNC Symbol;Acc:HGNC:6167]	-
ENSG00000100908	10.5684	11.7658	9.32947	12.6596	12.0514	10.7115	10.0383	9.59282	10.5176	EMC9	14	24138959	24141588	-	1588	protein_coding	ER membrane protein complex subunit 9 [Source:HGNC Symbol;Acc:HGNC:20273]	-
ENSG00000236754	0.0445184	0.0430858	0.0448721	0	0	0	0.0406898	0.0852771	0	AC007666.1	22	17580157	17589192	-	1960	antisense	novel transcript	-
ENSG00000271245	0	0	0	0	0	0	0	0	0	AL136139.1	6	11154929	11155150	-	222	processed_pseudogene	P antigen family, member 4 (prostate associated) (PAGE4) pseudogene	-
ENSG00000211639	0	0	0	0	0	0	0	0	0	IGLV4-60	22	22162199	22162681	+	362	IG_V_gene	immunoglobulin lambda variable 4-60 [Source:HGNC Symbol;Acc:HGNC:5920]	-
ENSG00000223599	0.0398931	0	0.04021	0.0443115	0.0374204	0	0	0.0382086	0	AL513523.1	1	153852106	153853414	-	1309	processed_pseudogene	adipose differentiation-related protein (ADFP) pseudogene	-
ENSG00000272166	0	0	0	0	0	0	0	0	0	RF01161	3	25555543	25555606	-	64	snoRNA		-
ENSG00000224104	0	0	0	0	0	0	0	0	0	AC079809.1	7	153144313	153144588	-	276	processed_pseudogene	SMT3 suppressor of mif two 3 homolog 2 (S. cerevisiae) (SUMO2) pseudogene	-
ENSG00000248554	0	0.088356	0.276057	0.101405	0	0	0	0.349755	0.170563	AC114956.2	5	43511058	43521811	+	572	antisense	novel transcript	-
ENSG00000205336	1.80069	1.29461	1.76314	3.88597	3.3299	2.69034	1.31667	1.97103	1.34568	ADGRG1	16	57610652	57665580	+	8659	protein_coding	adhesion G protein-coupled receptor G1 [Source:HGNC Symbol;Acc:HGNC:4512]	-
ENSG00000268818	0	0	0	0	0	0	0	0	0	AL049747.1	22	35626988	35635134	-	852	sense_intronic	novel transcript	-
ENSG00000235078	0.160842	0	0.2702	0.0595521	0.100582	0.193351	0.0980065	0.0513501	0	AC231981.1	2	3519275	3523197	+	974	antisense	novel transcript, antisense to ADI1	-
ENSG00000262480	0	0	0	0	0	0	0	0	0	SAMD11P1	17	2613284	2613944	-	661	processed_pseudogene	sterile alpha motif domain containing 11 pseudogene 1 [Source:HGNC Symbol;Acc:HGNC:44473]	-
ENSG00000284385	0	0	0	0	0	0	0	0	0	MIR4313	15	75762215	75762315	-	101	miRNA	microRNA 4313 [Source:HGNC Symbol;Acc:HGNC:38310]	-
ENSG00000188856	0	0.227656	0.177821	0	0.165484	0.106038	0.107498	0.112646	0.274667	RPSAP47	8	80558870	80559757	+	888	processed_pseudogene	ribosomal protein SA pseudogene 47 [Source:HGNC Symbol;Acc:HGNC:36162]	-
ENSG00000087269	16.9009	18.5394	17.8423	26.4505	25.6777	25.0224	19.6271	19.3965	18.2682	NOP14	4	2937933	2963385	-	3538	protein_coding	NOP14 nucleolar protein [Source:HGNC Symbol;Acc:HGNC:16821]	-
ENSG00000280295	0	0	0	0	0	0	0	0	0	AC099811.6	17	42233832	42235469	+	1638	TEC	novel transcript	-
ENSG00000253862	0	0	0	0	0	0	0	0	0	IGHVIII-47-1	14	106531141	106531471	-	331	IG_V_pseudogene	immunoglobulin heavy variable (III)-47-1 (pseudogene) [Source:HGNC Symbol;Acc:HGNC:5701]	-
ENSG00000279370	0	0	0	0	0	0.164045	0	0	0	AC004777.1	5	131261321	131261607	-	287	TEC	TEC	-
ENSG00000242818	0	0	0	0	0	0	0	0	0	RN7SL846P	10	119768247	119768538	+	292	misc_RNA	RNA, 7SL, cytoplasmic 846, pseudogene [Source:HGNC Symbol;Acc:HGNC:46862]	-
ENSG00000197355	22.4083	20.4002	22.0429	24.1117	25.5536	22.3092	20.3662	21.5653	20.2443	UAP1L1	9	137077501	137084539	+	5283	protein_coding	UDP-N-acetylglucosamine pyrophosphorylase 1 like 1 [Source:HGNC Symbol;Acc:HGNC:28082]	-
ENSG00000207947	0	0.580915	0	0	0.563026	0	0.548611	0.574885	0	MIR152	17	48037161	48037247	-	87	miRNA	microRNA 152 [Source:HGNC Symbol;Acc:HGNC:31538]	-
ENSG00000231535	0.280753	0.0905728	0	0	0	0	0	0.0896326	0	LINC00278	Y	3002912	3102272	+	775	lincRNA	long intergenic non-protein coding RNA 278 [Source:HGNC Symbol;Acc:HGNC:38712]	-
ENSG00000229308	0.373668	0.271232	0.753273	0	0.26288	0.421118	0.341533	0.357889	1.04718	AC010737.1	Y	4036497	4100320	+	559	lincRNA	novel transcript	-
ENSG00000168575	91.6324	92.2936	95.4857	121.449	121.362	114.664	85.6825	94.3054	89.9215	SLC20A2	8	42416475	42541926	-	6641	protein_coding	solute carrier family 20 member 2 [Source:HGNC Symbol;Acc:HGNC:10947]	-
ENSG00000229503	0	0	0	0	0	0	0	0.104853	0	AC092155.2	2	62532583	62533059	-	477	processed_pseudogene	ribosomal protein L21 (RPL21) pseudogene	-
ENSG00000137947	19.7844	18.757	23.1295	25.7878	23.6079	25.2393	21.3428	25.2653	26.0249	GTF2B	1	88852932	88891944	-	2225	protein_coding	general transcription factor IIB [Source:HGNC Symbol;Acc:HGNC:4648]	-
ENSG00000235998	0	0	0	0	0	0	0	0	0	TAAR7P	6	132559024	132559265	+	242	unprocessed_pseudogene	trace amine associated receptor 7, pseudogene [Source:HGNC Symbol;Acc:HGNC:31925]	-
ENSG00000135211	16.3858	16.896	16.9276	16.8398	15.1307	16.0158	16.7495	18.0895	17.7862	TMEM60	7	77793728	77798580	-	1023	protein_coding	transmembrane protein 60 [Source:HGNC Symbol;Acc:HGNC:21754]	-
ENSG00000199710	0	0	0	0	0	0	0	0	0	RF00019	1	110764408	110764506	-	99	misc_RNA		-
ENSG00000182670	116.7	105.447	114.734	77.1719	79.9466	81.5186	112.306	101.289	109.063	TTC3	21	37073226	37203112	+	15883	protein_coding	tetratricopeptide repeat domain 3 [Source:HGNC Symbol;Acc:HGNC:12393]	-
ENSG00000257065	0	0	0	0	0.0642825	0	0	0	0	AL049844.1	6	143807092	143844617	+	762	protein_coding	novel transcript	-
ENSG00000226359	0	0.0576279	0	0.0661388	0	0.161052	0	0.0570296	0.0556225	ACTG1P24	17	17242010	17242886	+	877	processed_pseudogene	actin gamma 1 pseudogene 24 [Source:HGNC Symbol;Acc:HGNC:49661]	-
ENSG00000213310	0	0	0	0	0.15501	0.297981	0	0	0	CYCSP19	7	121398452	121398767	+	316	processed_pseudogene	cytochrome c, somatic pseudogene 19 [Source:HGNC Symbol;Acc:HGNC:24392]	-
ENSG00000221552	0	0	0	0	0	0	0	0	0	MIR1303	5	154685776	154685861	+	86	miRNA	microRNA 1303 [Source:HGNC Symbol;Acc:HGNC:35301]	-
ENSG00000199407	0.431571	0	0	0	0.404821	0	0	0	0	RNA5SP301	10	13727796	13727916	+	121	rRNA_pseudogene	RNA, 5S ribosomal pseudogene 301 [Source:HGNC Symbol;Acc:HGNC:43201]	-
ENSG00000277774	0	0	0	0	0	0	0	0	0	RN7SL763P	9	39886861	39887144	-	284	misc_RNA	RNA, 7SL, cytoplasmic 763, pseudogene [Source:HGNC Symbol;Acc:HGNC:46779]	-
ENSG00000251803	0	0	0	0	0	0	0	0	0	RF00019	10	17403508	17403620	+	113	misc_RNA		-
ENSG00000196862	0.00955712	0.0277487	0.0288991	0.0424625	0.0268942	0.0258497	0.00873521	0.0183071	0	RGPD4	2	107826937	107890841	+	5464	protein_coding	RANBP2-like and GRIP domain containing 4 [Source:HGNC Symbol;Acc:HGNC:32417]	-
ENSG00000223393	0.854989	0.954779	0.861781	0.438316	0.308459	0.29648	0.901685	0.629912	0.552933	AL118511.1	1	230874846	230879015	+	794	antisense	uncharacterized LOC101927604 [Source:NCBI gene;Acc:101927604]	-
ENSG00000224340	0	0	0	0	0	0	0	0	0	AL590639.1	1	10054445	10054781	-	337	processed_pseudogene	pseudogene similar to part of ribosomal protein L21 (RPL21)	-
ENSG00000226954	0	0	0	0.0153652	0	0	0	0	0	AL023802.1	22	49718053	49724506	-	3775	lincRNA	novel transcript	-
ENSG00000232901	0.710478	0.515711	0.537091	0.197292	0	0.320279	0	0.170119	0.165922	CYCSP10	3	10000647	10000940	-	294	processed_pseudogene	cytochrome c, somatic pseudogene 10 [Source:HGNC Symbol;Acc:HGNC:24384]	-
ENSG00000222581	0	0	0	0	0	0	0	0	0	RNU2-47P	9	12300266	12300451	-	186	snRNA	RNA, U2 small nuclear 47, pseudogene [Source:HGNC Symbol;Acc:HGNC:48540]	-
ENSG00000124486	55.7367	47.5823	52.9963	53.7184	55.1803	56.9312	44.9519	45.3716	44.284	USP9X	X	41085635	41236579	+	13962	protein_coding	ubiquitin specific peptidase 9 X-linked [Source:HGNC Symbol;Acc:HGNC:12632]	-
ENSG00000278112	0.670922	0.108222	0.338126	0.372615	0.209779	0.403263	0	0.107098	0.104456	AC145423.3	12	123519390	123519856	-	467	sense_intronic	novel transcript, sense intronic to RILPL1	-
ENSG00000249460	0	0	0	0	0	0	0	0	0	LINC02500	4	181261161	181265029	-	493	lincRNA	long intergenic non-protein coding RNA 2500 [Source:HGNC Symbol;Acc:HGNC:53488]	-
ENSG00000052850	0.0181509	0.0263502	0.0274426	0.0100806	0.0255387	0.081823	0.00829496	0.00869221	0.00847775	ALX4	11	44260440	44310166	-	5754	protein_coding	ALX homeobox 4 [Source:HGNC Symbol;Acc:HGNC:450]	Homeobox
ENSG00000242836	0	0	0	0	0	0	0	0	0	MTCO3P35	3	106896891	106897671	-	781	unprocessed_pseudogene	MT-CO3 pseudogene 35 [Source:HGNC Symbol;Acc:HGNC:52138]	-
ENSG00000226726	0	0	0	0.170099	0	0.138067	0	0	0	TMEM256P2	2	221532668	221533008	+	341	processed_pseudogene	transmembrane protein 256 pseudogene 2 [Source:HGNC Symbol;Acc:HGNC:45088]	-
ENSG00000250300	0	0	0	0	0	0	0	0	0	AP001960.1	4	99469598	99498698	-	658	unprocessed_pseudogene	alcohol dehydrogenase (ADH) family pseudogene	-
ENSG00000169885	0.531379	0.233763	0.48691	0.107315	0.0453129	0.348425	0.264917	0.231337	0.361006	CALML6	1	1914827	1917296	+	2321	protein_coding	calmodulin like 6 [Source:HGNC Symbol;Acc:HGNC:24193]	-
ENSG00000253117	0	0	0	0	0	0	0	0	0	OC90	8	132024220	132059380	-	1782	protein_coding	otoconin 90 [Source:HGNC Symbol;Acc:HGNC:8100]	-
ENSG00000188396	1.91633	1.25852	1.37968	0.456124	0.641983	0.74046	1.68897	0.589954	1.98193	TCTEX1D4	1	44805913	44806675	-	763	protein_coding	Tctex1 domain containing 4 [Source:HGNC Symbol;Acc:HGNC:32315]	-
ENSG00000233712	0	0	0	0	0	0	0	0	0	AL135929.1	1	157636300	157640301	-	552	unprocessed_pseudogene	pseudogene similar to part of Fc receptor-like protein	-
ENSG00000221630	0	0	0	0	0	0	0	0	0	MIR1179	15	88608107	88608197	+	91	miRNA	microRNA 1179 [Source:HGNC Symbol;Acc:HGNC:35260]	-
ENSG00000177084	7.11222	5.66552	6.50699	11.9107	11.7262	11.6901	5.42548	5.81631	6.05609	POLE	12	132623753	132687365	-	16609	protein_coding	DNA polymerase epsilon, catalytic subunit [Source:HGNC Symbol;Acc:HGNC:9177]	-
ENSG00000178035	82.2151	94.2008	94.4636	119.152	125.142	121.694	97.9907	101.934	96.1553	IMPDH2	3	49024325	49029408	-	2773	protein_coding	inosine monophosphate dehydrogenase 2 [Source:HGNC Symbol;Acc:HGNC:6053]	-
ENSG00000245534	0.0721272	0	0	0	0.0676565	0	0	0.414489	0.269508	RORA-AS1	15	60479178	60630637	+	2036	antisense	RORA antisense RNA 1 [Source:HGNC Symbol;Acc:HGNC:51410]	-
ENSG00000259089	0	0	0	0	0	0	0	0	0	GRAMD4P5	15	20813299	20814958	+	761	unprocessed_pseudogene	GRAM domain containing 4 pseudogene 5 [Source:HGNC Symbol;Acc:HGNC:49140]	-
ENSG00000214820	0.431571	0.464092	0.676666	0.31958	0.404821	0.302632	0.438284	0.321492	0.268766	MPRIPP1	3	44579938	44581026	-	1089	processed_pseudogene	myosin phosphatase Rho interacting protein pseudogene 1 [Source:HGNC Symbol;Acc:HGNC:44594]	-
ENSG00000213222	2.84745	3.1495	4.04884	3.50169	3.10021	3.52992	3.90385	4.13951	3.41989	AC093724.1	2	131723253	131724279	-	1027	processed_pseudogene	translocase of outer mitochondrial membrane 40 (TOMM40) pseudogene	-
ENSG00000120137	20.4196	20.3092	20.7068	18.5184	19.2056	19.1057	19.268	18.2509	17.7104	PANK3	5	168548495	168579600	-	10580	protein_coding	pantothenate kinase 3 [Source:HGNC Symbol;Acc:HGNC:19365]	-
ENSG00000279523	0	0	0	0	0	0	0	0	0	AC040168.1	16	56108980	56109970	+	991	TEC	novel transcript	-
ENSG00000251131	0	0.259178	0.134961	0.297455	0	0	0	0	0	AC025171.3	5	43018429	43024247	+	553	antisense	novel transcript	-
ENSG00000207302	0	0	0	0	0	0	0	0	0	RF00019	1	25877496	25877605	+	110	misc_RNA		-
ENSG00000207122	0	0	0	0	0	0	0	0	0	RNU6-591P	X	39081180	39081285	-	106	snRNA	RNA, U6 small nuclear 591, pseudogene [Source:HGNC Symbol;Acc:HGNC:47554]	-
ENSG00000254411	0	0	0	0	0	0	0	0	0	AP002512.1	11	56495760	56496412	+	653	processed_pseudogene	ubiquitin carboxyl-terminal esterase L1 (ubiquitin thiolesterase) (UCHL1) pseudogene	-
ENSG00000248652	0	0	0	0	0	0	0	0	0	AC034244.1	5	57081745	57081951	-	207	processed_pseudogene	cytochrome c oxidase subunit VIc (COX6C) pseudogene	-
ENSG00000212657	0	0	0	0	0	0	0	0	0	KRTAP16-1	17	41307700	41309253	-	1554	protein_coding	keratin associated protein 16-1 [Source:HGNC Symbol;Acc:HGNC:18916]	-
ENSG00000057608	191.548	178.269	198.998	232.906	236.767	232.834	180.165	196.134	186.675	GDI2	10	5765223	5842132	-	4033	protein_coding	GDP dissociation inhibitor 2 [Source:HGNC Symbol;Acc:HGNC:4227]	-
ENSG00000234837	0	0	0	0	0	0	0	0	0	AC073464.2	2	94750582	94751293	+	712	processed_pseudogene	novel zinc finger protein pseudogene	-
ENSG00000226837	0	0	0	0	0	0	0	0	0	HMGB1P32	X	98422138	98422809	+	565	processed_pseudogene	high mobility group box 1 pseudogene 32 [Source:HGNC Symbol;Acc:HGNC:39123]	-
ENSG00000203795	0	0	0	0	0	0	0	0	0	FAM24A	10	122910701	122913111	+	596	protein_coding	family with sequence similarity 24 member A [Source:HGNC Symbol;Acc:HGNC:23470]	-
ENSG00000255993	0.0391162	0.0757148	0.157708	0.086897	0	0.1058	0	0.0749288	0	PSMC1P9	12	18692762	18694096	+	1335	processed_pseudogene	proteasome 26S subunit, ATPase 1 pseudogene 9 [Source:HGNC Symbol;Acc:HGNC:39784]	-
ENSG00000260835	0	0	0	0	0	0	0	0	0	AC007223.1	16	6573767	6577359	+	572	sense_intronic	novel transcript	-
ENSG00000149639	11.1076	10.2481	11.7277	12.7054	13.4559	12.377	8.7137	9.03679	9.00597	SOGA1	20	36777442	36863686	-	15128	protein_coding	suppressor of glucose, autophagy associated 1 [Source:HGNC Symbol;Acc:HGNC:16111]	-
ENSG00000185247	0	0	0	0	0	0	0	0	0	MAGEA11	X	149688228	149717266	+	3465	protein_coding	MAGE family member A11 [Source:HGNC Symbol;Acc:HGNC:6798]	-
ENSG00000174572	0	0	0	0	0	0	0	0	0	RPL10P2	6	27211244	27211913	+	670	processed_pseudogene	ribosomal protein L10 pseudogene 2 [Source:HGNC Symbol;Acc:HGNC:13975]	-
ENSG00000238884	0	0	0	0	0	0	0	0	0	RNU7-85P	8	79800133	79800195	-	63	snRNA	RNA, U7 small nuclear 85 pseudogene [Source:HGNC Symbol;Acc:HGNC:34181]	-
ENSG00000261738	0	0	0	0	0	0	0	0	0	MIR3976HG	18	5748819	5876328	+	1820	lincRNA	MIR3976 host gene [Source:HGNC Symbol;Acc:HGNC:51104]	-
ENSG00000241255	0	0	0	0	0	0	0.237459	0.124415	0	AL136126.1	11	33237008	33237409	+	402	processed_pseudogene	ribosomal protein S24 (RPS24) pseudogene	-
ENSG00000270574	0	0	0	0.0821971	0.0231381	0	0.0450913	0.0472508	0	AC010680.2	2	178578790	178580906	+	2117	antisense	novel transcript, antisense to titin	-
ENSG00000214216	0	0	0	0	0	0	0	0	0	IQCJ	3	158962928	159266307	+	2923	protein_coding	IQ motif containing J [Source:HGNC Symbol;Acc:HGNC:32406]	-
ENSG00000273778	0	0	0	0	0	0	0	0	0	MIR6765	14	105150778	105150864	-	87	miRNA	microRNA 6765 [Source:HGNC Symbol;Acc:HGNC:50030]	-
ENSG00000165383	0	0	0	0	0	0	0	0	0	LRRC18	10	48909483	48914232	-	1617	protein_coding	leucine rich repeat containing 18 [Source:HGNC Symbol;Acc:HGNC:23199]	-
ENSG00000265933	0	0	0	0	0	0	0	0	0	LINC00668	18	6919496	6929966	-	4866	lincRNA	long intergenic non-protein coding RNA 668 [Source:HGNC Symbol;Acc:HGNC:44328]	-
ENSG00000018869	2.51166	1.9229	1.77591	2.54001	1.54721	1.8251	1.78171	1.97475	1.89101	ZNF582	19	56375846	56393545	-	3350	protein_coding	zinc finger protein 582 [Source:HGNC Symbol;Acc:HGNC:26421]	zf-C2H2
ENSG00000250462	1.87393	2.12799	2.19102	1.77619	1.66403	1.77961	1.75844	1.96231	2.47406	LRRC37BP1	17	30629680	30637466	+	5202	transcribed_unprocessed_pseudogene	leucine rich repeat containing 37B pseudogene 1 [Source:HGNC Symbol;Acc:HGNC:25390]	-
ENSG00000271755	0	0	0	0	0	0.0159326	0.032304	0	0	AL031118.1	6	27404010	27406964	-	2955	lincRNA	novel transcript	-
ENSG00000165588	0	0	0	0	0	0	0	0	0	OTX2	14	56799905	56810479	-	3272	protein_coding	orthodenticle homeobox 2 [Source:HGNC Symbol;Acc:HGNC:8522]	TF_Otx
ENSG00000259674	0	0	0	0	0	0	0	0	0	AC092868.1	15	59406963	59408154	-	802	processed_pseudogene	ribosomal protein L7a (RPL7A) pseudogene	-
ENSG00000255074	0.101992	0.394841	0.102803	0	0.0956705	0.091955	0.0932211	0	0	AC018523.1	11	14440787	14441677	+	512	processed_pseudogene	ribosomal protein L13a pseudogene	-
ENSG00000228336	0	0	0	0	0	0	0	0	0	OR9H1P	1	247770169	247779524	+	4888	polymorphic_pseudogene	olfactory receptor family 9 subfamily H member 1 pseudogene [Source:HGNC Symbol;Acc:HGNC:15038]	-
ENSG00000255870	0	0	0	0	0	0	0	0	0	AP003170.2	11	113789242	113790027	+	786	processed_pseudogene	SH3-domain GRB2-like 1 (SH3GL1) pseudogene	-
ENSG00000224940	0	0.0250444	0	0	0	0	0	0	0	PRRT4	7	128350325	128361685	-	3683	protein_coding	proline rich transmembrane protein 4 [Source:HGNC Symbol;Acc:HGNC:37280]	-
ENSG00000230539	0	0	0	0	0	0	0	0	0	AOAH-IT1	7	36597834	36600120	-	573	sense_intronic	AOAH intronic transcript 1 [Source:HGNC Symbol;Acc:HGNC:41307]	-
ENSG00000225889	0.2238	0	0	0.0828625	0	0	0.0681845	0	0	AC012368.1	2	64143239	64252859	+	2453	antisense	uncharacterized LOC100507006 [Source:NCBI gene;Acc:100507006]	-
ENSG00000226601	0	0	0	0	0	0	0	0	0	AL359979.1	1	223181144	223188154	+	487	lincRNA	novel transcript	-
ENSG00000255525	0	0	0	0	0	0	0	0	0	AL137804.1	11	31305685	31314548	+	576	antisense	novel transcript	-
ENSG00000272574	2.37834	1.10086	1.25073	2.5269	2.03693	1.86459	1.32319	0.891356	0.772767	AL596325.2	1	162593103	162593754	+	505	sense_intronic	novel transcript, sense intronic to UAP1	-
ENSG00000235370	0.0225232	0.0980929	0.113511	0.0625445	0.126763	0.03046	0.0617587	0.0431443	0.0946794	DNM1P51	15	84398316	84411701	-	8796	transcribed_unprocessed_pseudogene	dynamin 1 pseudogene 51 [Source:HGNC Symbol;Acc:HGNC:48500]	-
ENSG00000223880	0	0	0	0	0	0	0	0	0	LINC01078	13	75250480	75252012	+	387	lincRNA	long intergenic non-protein coding RNA 1078 [Source:HGNC Symbol;Acc:HGNC:49121]	-
ENSG00000073792	56.4845	55.9701	58.7053	70.3026	74.282	67.7547	56.9605	52.7737	55.8046	IGF2BP2	3	185643739	185825056	-	4735	protein_coding	insulin like growth factor 2 mRNA binding protein 2 [Source:HGNC Symbol;Acc:HGNC:28867]	-
ENSG00000256499	0	0	0	0	0	0	0	0	0	LINC02468	12	20120980	20129813	-	633	lincRNA	long intergenic non-protein coding RNA 2468 [Source:HGNC Symbol;Acc:HGNC:53406]	-
ENSG00000274752	0	0	0.128692	0.283637	0	0.345337	0	0	0	TRBV12-3	7	142560423	142560931	+	409	TR_V_gene	T cell receptor beta variable 12-3 [Source:HGNC Symbol;Acc:HGNC:12185]	-
ENSG00000240747	0	0.0440241	0	0.0505259	0	0	0	0.0435671	0	KRBOX1	3	42809483	42942792	+	2943	protein_coding	KRAB box domain containing 1 [Source:HGNC Symbol;Acc:HGNC:38708]	-
ENSG00000273232	0	0	0	0	0	0	0	0	0	AC090912.3	18	22882825	22883357	-	533	sense_intronic	novel transcript, sense intronic to RBBP8	-
ENSG00000196166	0	0	0	0	0.0535629	0	0	0.0273455	0	C8orf86	8	38510834	38560939	-	2762	protein_coding	chromosome 8 open reading frame 86 [Source:HGNC Symbol;Acc:HGNC:33774]	-
ENSG00000264235	0.118817	0.229987	0.179641	0.197965	0.445809	0.26781	0.0542994	0	0.055496	AP005329.1	18	3255436	3261850	-	1063	antisense	uncharacterized LOC104968399 [Source:NCBI gene;Acc:104968399]	-
ENSG00000258687	0	0	0	0	0	0	0	0	0	AL358334.1	14	50848122	50865659	+	174	antisense	novel transcript, antisense to PYGL	-
ENSG00000239175	0	0	0	0	0	0	0	0	0	RNU6-1218P	8	30043801	30043908	-	108	snRNA	RNA, U6 small nuclear 1218, pseudogene [Source:HGNC Symbol;Acc:HGNC:48181]	-
ENSG00000057252	15.5585	13.3069	15.3272	25.211	24.9686	24.0166	13.3445	15.1544	14.5247	SOAT1	1	179293714	179358680	+	7005	protein_coding	sterol O-acyltransferase 1 [Source:HGNC Symbol;Acc:HGNC:11177]	-
ENSG00000267233	0	0	0	0	0	0	0	0	0	HNRNPA3P16	18	50814392	50815730	+	1016	processed_pseudogene	heterogeneous nuclear ribonucleoprotein A3 pseudogene 16 [Source:HGNC Symbol;Acc:HGNC:48762]	-
ENSG00000268352	0	0	0	0	0	0	0.276958	0	0	AC006115.1	19	56672268	56684653	+	517	lincRNA	novel transcript	-
ENSG00000280355	0.44296	0.547791	0.545697	0.24601	0.415504	0.354993	0.449851	0.565674	0.413787	AL132656.4	10	79681973	79684094	-	2122	TEC	novel transcript	-
ENSG00000122376	8.35679	8.22076	9.64908	8.91192	11.0406	11.0893	9.03663	8.36088	7.97134	SHLD2	10	87094161	87191468	+	4242	protein_coding	shieldin complex subunit 2 [Source:HGNC Symbol;Acc:HGNC:28773]	-
ENSG00000198899	4473.29	3748.99	3528.7	3872.11	3755.53	3875.99	3731.85	3783.95	4124.6	MT-ATP6	MT	8527	9207	+	681	protein_coding	mitochondrially encoded ATP synthase membrane subunit 6 [Source:HGNC Symbol;Acc:HGNC:7414]	-
ENSG00000102901	29.7567	26.8698	31.5123	49.0926	45.8819	46.3357	26.4421	30.0369	25.208	CENPT	16	67828157	67847811	-	5539	protein_coding	centromere protein T [Source:HGNC Symbol;Acc:HGNC:25787]	-
ENSG00000176540	0	0	0	0	0	0	0	0	0	OR4C5	11	48365485	48366465	-	981	protein_coding	olfactory receptor family 4 subfamily C member 5 (gene/pseudogene) [Source:HGNC Symbol;Acc:HGNC:14702]	-
ENSG00000239227	0	0	0	0	0	0	0	0	0	AC069439.1	3	166861944	166862110	+	167	processed_pseudogene	pseudogene similar to part of S-phase kinase-associated protein 2 (p45) SKP2	-
ENSG00000123908	21.9897	19.5685	22.2525	25.2507	25.4656	23.7868	19.3594	15.7435	17.0498	AGO2	8	140520156	140635619	-	15833	protein_coding	argonaute 2, RISC catalytic component [Source:HGNC Symbol;Acc:HGNC:3263]	-
ENSG00000242353	0	0	0	0	0	0	0	0	0	RPL12P30	11	30368148	30368646	+	499	processed_pseudogene	ribosomal protein L12 pseudogene 30 [Source:HGNC Symbol;Acc:HGNC:35970]	-
ENSG00000239799	0	0	0	0	0	0	0	0	0	ITIH4-AS1	3	52823935	52825314	+	395	antisense	ITIH4 antisense RNA 1 [Source:HGNC Symbol;Acc:HGNC:40310]	-
ENSG00000249551	0	0	0	0	0	0.0810343	0	0	0	LINC02216	5	118575575	118581324	+	581	lincRNA	long intergenic non-protein coding RNA 2216 [Source:HGNC Symbol;Acc:HGNC:53083]	-
ENSG00000133101	0.117878	0.171127	0.207926	0.196401	0.165858	0.132847	0.134676	0.169351	0.165172	CCNA1	13	36431520	36442882	+	2400	protein_coding	cyclin A1 [Source:HGNC Symbol;Acc:HGNC:1577]	-
ENSG00000270557	0	0.0572363	0.119218	0.0656894	0	0	0.0540534	0.113284	0	AC013731.1	2	157877683	157878565	+	883	lincRNA	novel transcript	-
ENSG00000252591	0	0	0	0	0	0	0	0	0	RNA5SP468	19	17972025	17972117	+	93	rRNA_pseudogene	RNA, 5S ribosomal pseudogene 468 [Source:HGNC Symbol;Acc:HGNC:43368]	-
ENSG00000228113	0	0	0	0	0	0	0	0	0	AC003991.1	7	88219359	88304367	+	4838	antisense	novel transcript, antisense to STEAP4	-
ENSG00000202601	0	0	0	0	0	0	0	0	0	MIR582	5	59703606	59703703	-	98	miRNA	microRNA 582 [Source:HGNC Symbol;Acc:HGNC:32838]	-
ENSG00000179148	0.0402933	0	0.0812267	0.134268	0.0377958	0.0363279	0.018414	0.0385918	0	ALOXE3	17	8095900	8119047	-	3760	protein_coding	arachidonate lipoxygenase 3 [Source:HGNC Symbol;Acc:HGNC:13743]	-
ENSG00000013503	8.09106	8.33862	7.58225	9.27866	8.5331	8.55659	6.57575	7.16295	7.66032	POLR3B	12	106357658	106510198	+	4858	protein_coding	RNA polymerase III subunit B [Source:HGNC Symbol;Acc:HGNC:30348]	-
ENSG00000249493	0	0	0	0	0	0.191386	0	0	0	ANKRD20A18P	21	14064325	14069087	+	492	unprocessed_pseudogene	ankyrin repeat domain 20 family member A18, pseudogene [Source:HGNC Symbol;Acc:HGNC:23756]	-
ENSG00000160917	34.5202	35.6969	27.9796	23.2626	21.6558	20.6165	34.6162	31.9569	34.8655	CPSF4	7	99438922	99457371	+	4250	protein_coding	cleavage and polyadenylation specific factor 4 [Source:HGNC Symbol;Acc:HGNC:2327]	-
ENSG00000055955	0.14546	0.0703895	0.109962	0	0	0	0	0.0348294	0.06794	ITIH4	3	52812975	52831479	-	5462	protein_coding	inter-alpha-trypsin inhibitor heavy chain family member 4 [Source:HGNC Symbol;Acc:HGNC:6169]	-
ENSG00000270098	0	0	0	0	0	0	0	0	0	LDHAL6EP	4	71434405	71437924	-	1143	processed_pseudogene	lactate dehydrogenase A like 6E, pseudogene [Source:HGNC Symbol;Acc:HGNC:44241]	-
ENSG00000233693	0	0	0	0	0	0	0	0	0	AL357568.1	1	164769116	164774641	-	1963	antisense	uncharacterized LOC100505795 [Source:NCBI gene;Acc:100505795]	-
ENSG00000213601	0	0	0	0	0.0694799	0	0.203103	0	0	KRT18P19	2	189311263	189311967	-	705	processed_pseudogene	keratin 18 pseudogene 19 [Source:HGNC Symbol;Acc:HGNC:33387]	-
ENSG00000240647	0	0	0	0	0	0	0	0	0	RN7SL305P	22	31981147	31981427	-	281	misc_RNA	RNA, 7SL, cytoplasmic 305, pseudogene [Source:HGNC Symbol;Acc:HGNC:46321]	-
ENSG00000260419	0	0	0	0	0	0	0	0	0	AC138869.2	16	33191561	33195354	-	262	antisense	novel transcript, antisense to TP53-target gene 3	-
ENSG00000249438	0	0	0	0	0	0	0	0	0	KRT18P45	5	80288449	80289781	+	1333	processed_pseudogene	keratin 18 pseudogene 45 [Source:HGNC Symbol;Acc:HGNC:33415]	-
ENSG00000200331	0	0	0	0	0	0	0	0	0	RNU6-183P	5	78314916	78315025	-	110	snRNA	RNA, U6 small nuclear 183, pseudogene [Source:HGNC Symbol;Acc:HGNC:47146]	-
ENSG00000133872	163.942	195.111	163.361	140.433	139.355	142.236	190.785	172.942	178.699	SARAF	8	30063012	30083208	-	2990	protein_coding	store-operated calcium entry associated regulatory factor [Source:HGNC Symbol;Acc:HGNC:28789]	-
ENSG00000207619	0	0	0	0	0	0	0	0	0	MIR585	5	169263601	169263694	-	94	miRNA	microRNA 585 [Source:HGNC Symbol;Acc:HGNC:32841]	-
ENSG00000221957	0	0	0	0	0	0	0	0	0	KIR2DS4	19	54832676	54848569	+	1608	polymorphic_pseudogene	killer cell immunoglobulin like receptor, two Ig domains and short cytoplasmic tail 4 [Source:HGNC Symbol;Acc:HGNC:6336]	-
ENSG00000259475	0	0.257855	0.0895152	0	0	0.0800696	0	0.0850595	0	AC036108.1	15	98954149	99105824	-	588	antisense	novel transcript, antisense to IGF1R and SYNM	-
ENSG00000230405	0	0	0	0	0	0	0	0	0	RPS3AP52	13	68634190	68634486	+	297	processed_pseudogene	ribosomal protein S3a pseudogene 52 [Source:HGNC Symbol;Acc:HGNC:42004]	-
ENSG00000167767	0.182784	0.299373	0.283441	0.234264	0.250588	0.304239	0.244172	0.336665	0.328359	KRT80	12	52168996	52192000	-	4350	protein_coding	keratin 80 [Source:HGNC Symbol;Acc:HGNC:27056]	-
ENSG00000227940	0	0	0	0	0	0	0	0	0	LINC01696	1	209325456	209328532	+	492	lincRNA	long intergenic non-protein coding RNA 1696 [Source:HGNC Symbol;Acc:HGNC:52484]	-
ENSG00000285668	0	0.0942904	0	0	0	0.0878376	0.445235	0.186623	0	AC126544.2	17	45586452	45588379	-	536	lincRNA	novel transcript	-
ENSG00000100095	0	0	0	0	0	0	0	0	0	SEZ6L	22	26169474	26383597	+	7149	protein_coding	seizure related 6 homolog like [Source:HGNC Symbol;Acc:HGNC:10763]	-
ENSG00000276496	0	0	0	0	0	0	0	0	0	RF02139	7	27186166	27186263	+	98	misc_RNA		-
ENSG00000100023	18.208	16.2113	17.9402	19.6281	20.5336	18.7217	16.8525	16.8023	15.5516	PPIL2	22	21666009	21700015	+	7669	protein_coding	peptidylprolyl isomerase like 2 [Source:HGNC Symbol;Acc:HGNC:9261]	-
ENSG00000186185	0.640357	0.259895	0.707906	3.25812	4.32092	3.76201	0.0755209	0.237413	0.289444	KIF18B	17	44924709	44947711	-	4655	protein_coding	kinesin family member 18B [Source:HGNC Symbol;Acc:HGNC:27102]	-
ENSG00000278422	0	0	0	0	0	0	0	0	0	RN7SL331P	15	84205454	84205700	-	247	misc_RNA	RNA, 7SL, cytoplasmic 331, pseudogene [Source:HGNC Symbol;Acc:HGNC:46347]	-
ENSG00000178999	1.3472	1.98682	2.58648	9.2635	12.2759	11.2786	1.17271	1.78186	1.85775	AURKB	17	8204733	8210600	-	2241	protein_coding	aurora kinase B [Source:HGNC Symbol;Acc:HGNC:11390]	-
ENSG00000213492	0.702513	0.30218	0.196693	0.303458	0.402703	0.175938	0.107016	0.261663	0.182291	NT5C3AP1	4	117574512	117576174	-	1663	transcribed_processed_pseudogene	5'-nucleotidase, cytosolic IIIA pseudogene 1 [Source:HGNC Symbol;Acc:HGNC:18530]	-
ENSG00000215007	0	0	0	0	0	0	0	0	0	DNAJA1P3	X	107351650	107352843	-	1194	processed_pseudogene	DnaJ heat shock protein family (Hsp40) member A1 pseudogene 3 [Source:HGNC Symbol;Acc:HGNC:39339]	-
ENSG00000105429	25.3822	25.6468	25.8318	11.7852	13.0872	12.7546	27.3033	21.6005	22.504	MEGF8	19	42325609	42378769	+	11372	protein_coding	multiple EGF like domains 8 [Source:HGNC Symbol;Acc:HGNC:3233]	-
ENSG00000250657	0.283805	0.274672	0.190706	3.25746	3.01709	2.21758	0	0.0906069	0	AC097451.1	4	43340875	43345600	+	681	processed_transcript	novel transcript	-
ENSG00000100053	0	0	0	0	0	0	0	0	0	CRYBB3	22	25199850	25207363	+	867	protein_coding	crystallin beta B3 [Source:HGNC Symbol;Acc:HGNC:2400]	-
ENSG00000182853	0.87276	0.563116	0.806385	0.727067	0.682219	0.786868	0.465326	0.975223	0.74734	VMO1	17	4785285	4786433	-	803	protein_coding	vitelline membrane outer layer 1 homolog [Source:HGNC Symbol;Acc:HGNC:30387]	-
ENSG00000283069	0	0	0	0	0	0	0	0	0	DUX4L32	20	29318824	29319579	+	756	unprocessed_pseudogene	double homeobox 4 like 32 (pseudogene) [Source:HGNC Symbol;Acc:HGNC:51771]	-
ENSG00000243667	2.17422	2.25456	1.76102	3.83817	3.0956	3.60546	1.95175	2.93768	3.44549	WDR92	2	68122936	68157560	-	4079	protein_coding	WD repeat domain 92 [Source:HGNC Symbol;Acc:HGNC:25176]	-
ENSG00000257373	0	0	0	0	0	0	0	0	0	AC012038.1	12	42979254	42996486	-	552	lincRNA	novel transcript	-
ENSG00000102362	1.64963	1.01115	1.16392	1.11976	1.16913	1.47076	1.25647	1.07087	0.958839	SYTL4	X	100674491	100732123	-	7428	protein_coding	synaptotagmin like 4 [Source:HGNC Symbol;Acc:HGNC:15588]	-
ENSG00000255313	0	0	0	0	0	0	0	0	0	AC100858.2	8	124936524	124943765	-	487	lincRNA	novel transcript	-
ENSG00000233640	0	0	0	0	0	0	0	0	0	KRTAP13-5P	21	30436466	30436964	-	499	unprocessed_pseudogene	keratin associated protein 13-5, pseudogene [Source:HGNC Symbol;Acc:HGNC:18929]	-
ENSG00000232789	0	0	0	0	0	0	0	0	0	AC053503.3	2	219358870	219358983	-	114	unprocessed_pseudogene	pseudogene similar to part of protein tyrosine phosphatase, receptor type, N (PTPRN)	-
ENSG00000255271	0	0	0	0	0	0	0	0	0	AL137224.1	11	34533014	34557924	-	389	lincRNA	novel transcript	-
ENSG00000278400	0	0	0	0	0	0	0	0	0	AC026120.2	12	56941174	56941482	-	309	processed_pseudogene	hydroxysteroid (17-beta) dehydrogenase 6 (HSD17B6) pseudogene	-
ENSG00000253083	0	0	0	0	0	0	0	0	0	RNA5SP106	2	147713455	147713554	-	100	rRNA_pseudogene	RNA, 5S ribosomal pseudogene 106 [Source:HGNC Symbol;Acc:HGNC:42904]	-
ENSG00000183346	0	0.0469699	0.0978344	0.215627	0.091047	0.131267	0.133074	0	0.136006	CABCOCO1	10	61662961	61766766	+	1789	protein_coding	ciliary associated calcium binding coiled-coil 1 [Source:HGNC Symbol;Acc:HGNC:28678]	-
ENSG00000236782	0.192931	0.68465	0.324107	0.0714332	0.482594	0.347889	0.0587798	0.369569	0.180225	AL391650.1	1	26169516	26171831	-	2073	protein_coding	novel protein	-
ENSG00000257434	0	0	0	0	0	0	0	0	0	AC073525.1	12	75020969	75044793	+	3188	antisense	novel transcript, antisense to KCNC2	-
ENSG00000243761	0	0	0	0	0	0	0	0	0	AC023194.2	8	86043102	86043507	+	406	processed_pseudogene	ribosomal protein L32 (RPL32) pseudogene	-
ENSG00000214914	0	0	0	0	0	0.402401	0	0	0	RPL23AP3	21	36016079	36016546	-	468	processed_pseudogene	ribosomal protein L23a pseudogene 3 [Source:HGNC Symbol;Acc:HGNC:10320]	-
ENSG00000163617	1.64521	1.71021	1.56615	1.48901	2.1148	1.18114	1.44803	1.22557	1.36609	CCDC191	3	113964137	114056613	-	5303	protein_coding	coiled-coil domain containing 191 [Source:HGNC Symbol;Acc:HGNC:29272]	-
ENSG00000257837	0	0	0	0	0	0	0	0	0	AC089998.2	12	82505211	82506188	-	277	lincRNA	novel transcript	-
ENSG00000172772	0	0	0	0	0	0	0	0	0	OR10W1	11	58266792	58268260	-	1469	protein_coding	olfactory receptor family 10 subfamily W member 1 [Source:HGNC Symbol;Acc:HGNC:15139]	-
ENSG00000224592	0.179143	0.260067	0.541697	0.596951	0.168039	0.0807563	0.818682	0.171578	0.669378	AL139158.2	1	38047314	38119025	+	684	lincRNA	novel transcript	-
ENSG00000138755	0.0190584	0	0.0192098	0	0.0178771	0	0	0.0365073	0.0890163	CXCL9	4	76001275	76007488	-	2740	protein_coding	C-X-C motif chemokine ligand 9 [Source:HGNC Symbol;Acc:HGNC:7098]	-
ENSG00000267658	0	0	0.371541	0	0.23051	0.443115	0.224608	0.470729	0.803451	AC099811.3	17	42154600	42155972	+	425	lincRNA	novel transcript	-
ENSG00000283938	0	0	0	0	0	0	0	0	0	MIR3917	1	25906362	25906454	-	93	miRNA	microRNA 3917 [Source:HGNC Symbol;Acc:HGNC:38911]	-
ENSG00000239649	0	0	0	0	0	0	0	0	0	MYADML	2	33722721	33728207	-	2528	transcribed_processed_pseudogene	myeloid associated differentiation marker like (pseudogene) [Source:HGNC Symbol;Acc:HGNC:31019]	-
ENSG00000253235	0	0	0	0	0	0	0	0	0	AC111149.1	8	73368770	73369295	-	343	lincRNA	novel transcript	-
ENSG00000228132	0	0	0	0	0	0	0	0	0	AL360221.1	9	6276640	6276974	+	335	processed_pseudogene	glycine cleavage system protein H (aminomethyl carrier) (GCSH) pseudogene	-
ENSG00000227630	0	0	0	0.0299143	0.0252621	0	0	0	0	LINC01132	1	234724042	234736720	+	5081	lincRNA	long intergenic non-protein coding RNA 1132 [Source:HGNC Symbol;Acc:HGNC:49444]	-
ENSG00000265334	0	0	0	0.090915	0	0	0	0.0783934	0	AC130324.2	17	30834325	30863028	-	638	antisense	novel transcript, antisense ATAD5	-
ENSG00000108622	0.103817	0.100476	0.209284	0	0.243456	0.234001	0.0474445	0.14915	0.09698	ICAM2	17	64002594	64020634	-	3243	protein_coding	intercellular adhesion molecule 2 [Source:HGNC Symbol;Acc:HGNC:5345]	-
ENSG00000213480	0	0	0	0	0	0	0	0	0	AC093816.1	4	121369433	121370345	-	913	processed_pseudogene	novel pseudogene	-
ENSG00000276673	0	0	0	0	0	0	0	0	0	RF02271	8	76733302	76733476	-	175	misc_RNA		-
ENSG00000251024	0	0	0	0	0	0	0	0	0	AC097372.2	4	146077846	146108157	-	522	lincRNA	novel transcript	-
ENSG00000270490	0	0.0234305	0	0	0.022709	0.0436541	0	0	0	AC110048.1	15	66808404	66810560	+	2157	processed_pseudogene	leucine zipper-EF-hand containing transmembrane protein 1 (LETM1) pseudogene	-
ENSG00000279939	0	0	0	0	0	0	0	0	0	AC025034.2	12	89544203	89544488	-	286	TEC	TEC	-
ENSG00000154359	3.85585	4.31083	4.22152	3.83984	4.77049	3.71613	4.7395	4.58444	4.28502	LONRF1	8	12721894	12756073	-	5685	protein_coding	LON peptidase N-terminal domain and ring finger 1 [Source:HGNC Symbol;Acc:HGNC:26302]	-
ENSG00000261523	0	0	0	0	0	0	0	0	0	AC009167.1	16	14695567	14707055	-	579	antisense	novel transcript, antisense to a novel member of the nuclear pore complex interacting protein-like NPIPL gene family	-
ENSG00000230795	0.249618	0.483171	0.201281	0.110906	0.187317	0.0900209	0.182521	0.191262	0.0932714	HLA-K	6	29926459	29929232	+	1046	unprocessed_pseudogene	major histocompatibility complex, class I, K (pseudogene) [Source:HGNC Symbol;Acc:HGNC:4969]	-
ENSG00000229313	0	0	0	0	0	0	0	0	0	AL133268.3	6	25041839	25056664	+	577	antisense	novel transcript	-
ENSG00000279709	0	0	0	0	0	0	0	0	0	CU633906.3	21	6309161	6312948	+	741	unprocessed_pseudogene	clustered mitochondria (cluA/CLU1) homolog (CLUH) pseudogene	-
ENSG00000231672	0.243167	0.38243	0.0612746	0.405149	0.399165	0.520686	0.166691	0.203786	0.28394	DIRC3	2	217284019	217756593	-	4665	lincRNA	disrupted in renal carcinoma 3 [Source:HGNC Symbol;Acc:HGNC:17805]	-
ENSG00000150276	0	0	0	0	0	0	0	0	0	PPIAP26	13	52820497	52821018	+	522	processed_pseudogene	peptidylprolyl isomerase A pseudogene 26 [Source:HGNC Symbol;Acc:HGNC:39271]	-
ENSG00000223803	14.3605	11.231	11.1118	9.66729	6.80324	10.0701	10.2087	14.5877	20.5964	RPS20P14	3	186900198	186900557	+	360	processed_pseudogene	ribosomal protein S20 pseudogene 14 [Source:HGNC Symbol;Acc:HGNC:36692]	-
ENSG00000137269	9.12671	8.20412	7.08547	4.39621	4.0173	3.99442	8.90873	7.18541	8.66358	LRRC1	6	53794497	53924121	+	4897	protein_coding	leucine rich repeat containing 1 [Source:HGNC Symbol;Acc:HGNC:14307]	-
ENSG00000163823	0	0	0	0	0	0	0	0	0	CCR1	3	46201709	46208396	-	2731	protein_coding	C-C motif chemokine receptor 1 [Source:HGNC Symbol;Acc:HGNC:1602]	-
ENSG00000163508	0	0	0	0	0	0.0170275	0	0	0	EOMES	3	27715949	27722711	-	3656	protein_coding	eomesodermin [Source:HGNC Symbol;Acc:HGNC:3372]	T-box
ENSG00000132879	11.6045	11.5166	9.68113	11.1784	10.7314	11.2013	10.4567	12.7785	10.289	FBXO44	1	11654375	11663327	+	3527	protein_coding	F-box protein 44 [Source:HGNC Symbol;Acc:HGNC:24847]	-
ENSG00000226080	0	0	0	0	0	0	0	0	0	AC062028.1	2	11102142	11102997	+	856	processed_pseudogene	ribosomal protein L6 (RPL6) pseudogene	-
ENSG00000271547	0.51096	0.395614	0.309011	0.340531	0	0	0.186807	0	0.763694	AC117498.3	12	48800576	48801086	-	511	processed_pseudogene	chromosome 20 open reading frame 27 (C20orf27) pseudogene	-
ENSG00000271048	0	0	0	0	0	0	0	0	0	AC087045.1	8	134673131	134673512	+	382	processed_pseudogene	developmental pluripotency associated 3 (DPPA3) pseudogene	-
ENSG00000205301	0	0	0	0	0	0	0	0	0	MGAT4D	4	140442262	140498377	-	5595	protein_coding	MGAT4 family member D [Source:HGNC Symbol;Acc:HGNC:43619]	-
ENSG00000235354	0.305381	0.295553	0	0	0.286452	0.275327	0	0.292485	0	RPS29P16	7	103348601	103348771	+	171	processed_pseudogene	ribosomal protein S29 pseudogene 16 [Source:HGNC Symbol;Acc:HGNC:35560]	-
ENSG00000283801	0	0	0	0	0	0	0	0	0	MIR1302-11	19	71973	72110	+	138	miRNA	microRNA 1302-11 [Source:HGNC Symbol;Acc:HGNC:38246]	-
ENSG00000217897	0	0	0	0	0	0.163476	0	0.173663	0	HSPE1P8	1	39304294	39304898	-	288	processed_pseudogene	heat shock protein family E (Hsp10) member 1 pseudogene 8 [Source:HGNC Symbol;Acc:HGNC:49326]	-
ENSG00000279539	0.332461	0.505626	0.382974	0.316528	0.400955	0.449613	0.477509	0.341166	0.465848	AC006486.2	19	42242775	42244973	+	2199	TEC	TEC	-
ENSG00000263293	0.204384	0.395614	0.515019	1.02159	0.191715	0.36854	0.747228	0.195753	0.190923	THCAT158	17	47303460	47323613	-	713	antisense	thyroid cancer-associated transcript 158 [Source:NCBI gene;Acc:102724508]	-
ENSG00000211958	0	0	0	0	0	0	0	0	0	IGHV3-38	14	106410493	106411021	-	426	IG_V_gene	immunoglobulin heavy variable 3-38 (non-functional) [Source:HGNC Symbol;Acc:HGNC:5601]	-
ENSG00000141068	22.5606	22.8235	20.4631	8.18385	7.89484	7.58823	21.9721	17.925	19.442	KSR1	17	27456470	27626438	+	12178	protein_coding	kinase suppressor of ras 1 [Source:HGNC Symbol;Acc:HGNC:6465]	-
ENSG00000234613	0	0	0	0	0	0	0	0	0	AL031584.2	X	45913267	45917040	-	767	lincRNA	novel transcript	-
ENSG00000082497	2.84468	3.84877	3.39391	1.57987	2.09656	1.28236	3.36943	1.94611	2.71156	SERTAD4	1	210232799	210246631	+	5467	protein_coding	SERTA domain containing 4 [Source:HGNC Symbol;Acc:HGNC:25236]	-
ENSG00000277020	0	0.185127	0	0	0.179426	0	0	0	0	AL590096.1	13	20564708	20567045	-	787	antisense	novel transcript, antisense to IFT88	-
ENSG00000136237	0.192251	0.11629	0.145333	0.0266929	0.0225418	0.0433327	0.32947	0.115083	0.157141	RAPGEF5	7	22118238	22357144	-	10245	protein_coding	Rap guanine nucleotide exchange factor 5 [Source:HGNC Symbol;Acc:HGNC:16862]	-
ENSG00000201386	0	0	0	0	0	0	0	0	0	RNU6-1163P	6	112971493	112971599	+	107	snRNA	RNA, U6 small nuclear 1163, pseudogene [Source:HGNC Symbol;Acc:HGNC:48126]	-
ENSG00000277173	0	0.135374	0	0	0	0	0	0	0	AC004241.4	12	47768529	47769648	+	1120	sense_intronic	novel transcript, sense intronic to SLC48A1	-
ENSG00000283871	0	0	0	0	0	0	0	0	0	MIR130B	22	21653304	21653385	+	82	miRNA	microRNA 130b [Source:HGNC Symbol;Acc:HGNC:31515]	-
ENSG00000168495	23.7177	23.8507	24.8914	27.4018	26.6633	25.3959	21.7015	23.9727	23.5494	POLR3D	8	22245104	22254600	+	5611	protein_coding	RNA polymerase III subunit D [Source:HGNC Symbol;Acc:HGNC:1080]	-
ENSG00000229871	0	0	0	0	0	0	0	0	0	RPSAP20	1	56207567	56208456	-	890	processed_pseudogene	ribosomal protein SA pseudogene 20 [Source:HGNC Symbol;Acc:HGNC:35595]	-
ENSG00000215043	0	0	0	0	0	0	0	0	0	GLULP6	2	194129354	194130266	-	913	processed_pseudogene	glutamate-ammonia ligase pseudogene 6 [Source:HGNC Symbol;Acc:HGNC:37990]	-
ENSG00000231210	0	0	0.0732057	0.161346	0.204381	0.0654811	0.0663827	0	0.0678455	LINC01510	7	116563594	116663829	-	1691	lincRNA	long intergenic non-protein coding RNA 1510 [Source:HGNC Symbol;Acc:HGNC:51196]	-
ENSG00000252149	0	0	0	0	0	0	0	0	0	RNA5SP315	10	48040462	48040577	+	116	rRNA_pseudogene	RNA, 5S ribosomal pseudogene 315 [Source:HGNC Symbol;Acc:HGNC:43215]	-
ENSG00000277129	0	0	0	0	0	0	0	0	0	AC012531.4	12	53968351	53968501	+	151	misc_RNA		-
ENSG00000184226	1.84227	1.547	2.90823	6.34957	6.68358	6.4057	1.39907	1.81637	1.54378	PCDH9	13	66302834	67230445	-	30944	protein_coding	protocadherin 9 [Source:HGNC Symbol;Acc:HGNC:8661]	-
ENSG00000222431	0	0	0	0	0	0	0	0	0	RNU6-141P	6	20452369	20452473	-	105	snRNA	RNA, U6 small nuclear 141, pseudogene [Source:HGNC Symbol;Acc:HGNC:47104]	-
ENSG00000199836	0	0	0	0	0	0	0	0	0	RNU1-47P	14	99945315	99945477	+	163	snRNA	RNA, U1 small nuclear 47, pseudogene [Source:HGNC Symbol;Acc:HGNC:48389]	-
ENSG00000152049	32.1775	41.4666	35.3907	9.63967	10.2398	8.87812	45.2064	33.0575	41.6961	KCNE4	2	223051814	223198399	+	4124	protein_coding	potassium voltage-gated channel subfamily E regulatory subunit 4 [Source:HGNC Symbol;Acc:HGNC:6244]	-
ENSG00000255288	0	0	0	0	0	0	0	0	0	AL358944.1	11	30167163	30167306	+	144	processed_pseudogene	follicle stimulating hormone, beta polypeptide (FSHB) pseudogene	-
ENSG00000184571	0	0	0	0	0	0	0	0	0	PIWIL3	22	24719034	24774720	-	3803	protein_coding	piwi like RNA-mediated gene silencing 3 [Source:HGNC Symbol;Acc:HGNC:18443]	-
ENSG00000232085	0	0	0.161954	0	0	0	0	0	0	AL606534.2	1	243164638	243169445	+	488	antisense	novel transcript, antisense to CEP170	-
ENSG00000188763	0.804074	0.778198	0.450256	0.669847	0.335215	0.322196	0.265389	0.620374	0.646796	FZD9	7	73433783	73436120	+	2338	protein_coding	frizzled class receptor 9 [Source:HGNC Symbol;Acc:HGNC:4047]	-
ENSG00000074800	1708.3	1654.48	1673.11	1817.03	1863.98	1800.88	1653.25	1772.09	1692.24	ENO1	1	8861000	8879250	-	5276	protein_coding	enolase 1 [Source:HGNC Symbol;Acc:HGNC:3350]	-
ENSG00000280352	0	0	0	0	0	0	0	0	0	AC116563.2	4	137601899	137602433	-	535	TEC	TEC	-
ENSG00000268240	0	0	0	0	0	0	0	0	0	AC123912.2	19	21587432	21594628	-	2612	lincRNA	novel transcript	-
ENSG00000237396	0	0	0	0	0	0	0	0	0	LNCNEF	20	22587522	22607517	-	659	lincRNA	lncRNA neighboring enhancer of FOXA2 [Source:HGNC Symbol;Acc:HGNC:50656]	-
ENSG00000179766	0.059341	0.0191438	0.0398749	0	0.0371086	0.0178337	0.0180792	0.0568352	0	ATP8B5P	9	35406755	35483035	+	6291	transcribed_unprocessed_pseudogene	ATPase phospholipid transporting 8B5, pseudogene [Source:HGNC Symbol;Acc:HGNC:27245]	-
ENSG00000244089	0	0	0	0	0	0	0	0	0	HMGB1P30	3	148824782	148825387	-	606	processed_pseudogene	high mobility group box 1 pseudogene 30 [Source:HGNC Symbol;Acc:HGNC:39121]	-
ENSG00000254373	0	0.151771	0	0	0	0	0.143331	0	0.146489	AC112191.2	5	160258253	160258585	+	333	processed_pseudogene	ubiquinol-cytochrome c reductase binding protein (UQCRB) pseudogene	-
ENSG00000270892	0	0	0	0	0	0	0	0	0	AC006077.1	5	134863091	134863433	-	343	processed_pseudogene	ribosomal protein L31 (RPL31) pseudogene	-
ENSG00000149548	0.150181	0.249168	0.194624	0.953225	0.623863	0.947809	0.274531	0.205485	0.180373	CCDC15	11	124954121	125041489	+	4823	protein_coding	coiled-coil domain containing 15 [Source:HGNC Symbol;Acc:HGNC:25798]	-
[truncated: 56,737 more rows]

## Sheet: Readcount_NR 1 Day
gene_id	WTD1_1	WTD1_2	WTD1_3	KOW_D1_1	KOW_D1_2	KOW_D1_3	NRD1_1	NRD1_2	NRD1_3	gene_name	gene_chr	gene_start	gene_end	gene_strand	gene_length	gene_biotype	gene_description	tf_family
ENSG00000223972	2	0	0	0	2	0	0	0	0	DDX11L1	1	11869	14409	+	1735	transcribed_unprocessed_pseudogene	DEAD/H-box helicase 11 like 1 [Source:HGNC Symbol;Acc:HGNC:37102]	-
ENSG00000227232	35	38	44	38	53	36	54	37	63	WASH7P	1	14404	29570	-	1351	unprocessed_pseudogene	WAS protein family homolog 7, pseudogene [Source:HGNC Symbol;Acc:HGNC:38034]	-
ENSG00000278267	4	1	2	3	3	0	7	6	1	MIR6859-1	1	17369	17436	-	68	miRNA	microRNA 6859-1 [Source:HGNC Symbol;Acc:HGNC:50039]	-
ENSG00000243485	0	1	1	0	0	0	0	0	0	MIR1302-2HG	1	29554	31109	+	1021	lincRNA	MIR1302-2 host gene [Source:HGNC Symbol;Acc:HGNC:52482]	-
ENSG00000284332	0	0	0	0	0	0	0	0	0	MIR1302-2	1	30366	30503	+	138	miRNA	microRNA 1302-2 [Source:HGNC Symbol;Acc:HGNC:35294]	-
ENSG00000237613	0	0	0	0	0	0	0	0	0	FAM138A	1	34554	36081	-	1219	lincRNA	family with sequence similarity 138 member A [Source:HGNC Symbol;Acc:HGNC:32334]	-
ENSG00000268020	0	0	0	0	0	0	0	0	0	OR4G4P	1	52473	53312	+	840	unprocessed_pseudogene	olfactory receptor family 4 subfamily G member 4 pseudogene [Source:HGNC Symbol;Acc:HGNC:14822]	-
ENSG00000240361	0	0	0	0	0	0	0	0	0	OR4G11P	1	57598	64116	+	1414	transcribed_unprocessed_pseudogene	olfactory receptor family 4 subfamily G member 11 pseudogene [Source:HGNC Symbol;Acc:HGNC:31276]	-
ENSG00000186092	0	0	0	0	0	0	0	0	0	OR4F5	1	65419	71585	+	2618	protein_coding	olfactory receptor family 4 subfamily F member 5 [Source:HGNC Symbol;Acc:HGNC:14825]	-
ENSG00000238009	0	0	0	0	0	0	0	0	0	AL627309.1	1	89295	133723	-	3726	lincRNA	novel transcript	-
ENSG00000239945	0	0	0	0	0	0	0	0	0	AL627309.3	1	89551	91105	-	1319	lincRNA	novel transcript	-
ENSG00000233750	0	1	0	0	0	0	0	0	1	CICP27	1	131025	134836	+	3812	processed_pseudogene	capicua transcriptional repressor pseudogene 27 [Source:HGNC Symbol;Acc:HGNC:48835]	-
ENSG00000268903	0	1	0	0	1	1	0	0	0	AL627309.6	1	135141	135895	-	755	processed_pseudogene	novel pseudogene	-
ENSG00000269981	0	0	0	0	0	0	0	2	0	AL627309.7	1	137682	137965	-	284	processed_pseudogene	novel pseudogene	-
ENSG00000239906	1	0	0	0	0	0	0	0	0	AL627309.2	1	139790	140339	-	323	antisense	novel transcript	-
ENSG00000241860	1	0	0	0	0	0	0	1	0	AL627309.5	1	141474	173862	-	6195	processed_transcript	uncharacterized LOC100996442 [Source:NCBI gene;Acc:100996442]	-
ENSG00000222623	0	0	0	0	0	0	0	0	0	RNU6-1100P	1	157784	157887	-	104	snRNA	RNA, U6 small nuclear 1100, pseudogene [Source:HGNC Symbol;Acc:HGNC:48063]	-
ENSG00000241599	0	0	0	0	0	0	0	0	0	AL627309.4	1	160446	161525	+	457	lincRNA	novel transcript	-
ENSG00000279928	0	0	0	0	0	0	0	0	0	FO538757.2	1	182696	184174	+	570	unprocessed_pseudogene	DEAD/H-box helicase 11 (DDX11) pseudogene	-
ENSG00000279457	103	111	92	116	173	73	142	92	122	FO538757.1	1	185217	195411	-	1397	unprocessed_pseudogene	WAS protein family homolog 2-like [Source:NCBI gene;Acc:102723897]	-
ENSG00000273874	0	0	0	0	0	0	0	0	0	MIR6859-2	1	187891	187958	-	68	miRNA	microRNA 6859-2 [Source:HGNC Symbol;Acc:HGNC:49954]	-
ENSG00000228463	16	12	17	18	16	12	10	21	7	AP006222.1	1	257864	359681	-	8224	transcribed_processed_pseudogene	ribosomal protein L23a (RPL23A) pseudogene	-
ENSG00000236679	2	1	2	0	5	1	1	3	1	RPL23AP24	1	347982	348366	-	385	processed_pseudogene	ribosomal protein L23a pseudogene 24 [Source:HGNC Symbol;Acc:HGNC:36176]	-
ENSG00000236601	0	0	0	0	0	0	0	0	0	AL732372.1	1	358857	366052	+	1095	lincRNA	novel transcript	-
ENSG00000237094	4	3	0	0	2	7	1	4	0	AL732372.2	1	365389	522928	-	6204	transcribed_unprocessed_pseudogene	pseudogene similar to part of septin 14 SEPT14	-
ENSG00000269732	0	0	0	0	0	0	0	0	0	WBP1LP7	1	439870	440232	+	363	processed_pseudogene	WW domain binding protein 1-like pseudogene 7 [Source:HGNC Symbol;Acc:HGNC:43955]	-
ENSG00000284733	0	0	0	0	0	0	0	0	0	OR4F29	1	450703	451697	-	995	protein_coding	olfactory receptor family 4 subfamily F member 29 [Source:HGNC Symbol;Acc:HGNC:31275]	-
ENSG00000233653	0	0	0	0	0	0	0	0	0	CICP7	1	487101	489906	+	2477	processed_pseudogene	capicua transcriptional repressor pseudogene 7 [Source:HGNC Symbol;Acc:HGNC:37756]	-
ENSG00000250575	0	0	0	1	0	0	0	0	0	AL732372.3	1	491225	493241	-	1239	unprocessed_pseudogene	novel pseudogene	-
ENSG00000278757	0	0	0	0	0	0	0	0	0	RF00026	1	516376	516479	-	104	snRNA		-
ENSG00000230021	1	13	0	3	2	0	4	0	4	AL669831.3	1	586071	827796	-	5495	transcribed_processed_pseudogene	uncharacterized LOC101928626 [Source:NCBI gene;Acc:101928626]	-
ENSG00000235146	0	0	0	0	0	0	0	0	0	AC114498.1	1	587629	594768	+	635	lincRNA	novel transcript	-
ENSG00000225972	3	10	3	1	5	6	12	2	8	MTND1P23	1	629062	629433	+	372	unprocessed_pseudogene	MT-ND1 pseudogene 23 [Source:HGNC Symbol;Acc:HGNC:42092]	-
ENSG00000225630	2575	2692	2482	2279	2738	3202	2718	2814	2545	MTND2P28	1	629640	630683	+	1044	unprocessed_pseudogene	MT-ND2 pseudogene 28 [Source:HGNC Symbol;Acc:HGNC:42129]	-
ENSG00000237973	1084	827	737	535	646	756	977	923	1145	MTCO1P12	1	631074	632616	+	1543	unprocessed_pseudogene	MT-CO1 pseudogene 12 [Source:HGNC Symbol;Acc:HGNC:52014]	-
ENSG00000278791	0	0	0	0	0	0	0	0	0	MIR6723	1	632325	632413	-	89	miRNA	microRNA 6723 [Source:HGNC Symbol;Acc:HGNC:50152]	-
ENSG00000229344	3	3	1	2	0	1	1	1	1	MTCO2P12	1	632757	633438	+	682	unprocessed_pseudogene	MT-CO2 pseudogene 12 [Source:HGNC Symbol;Acc:HGNC:52028]	-
ENSG00000240409	0	0	0	0	0	0	0	0	0	MTATP8P1	1	633535	633741	+	207	unprocessed_pseudogene	MT-ATP8 pseudogene 1 [Source:HGNC Symbol;Acc:HGNC:44571]	-
ENSG00000248527	9081	6629	6526	5947	6636	7277	7037	6816	10112	MTATP6P1	1	633696	634376	+	681	unprocessed_pseudogene	MT-ATP6 pseudogene 1 [Source:HGNC Symbol;Acc:HGNC:44575]	-
ENSG00000198744	30	13	14	13	22	15	19	26	28	MTCO3P12	1	634376	634922	+	547	unprocessed_pseudogene	MT-CO3 pseudogene 12 [Source:HGNC Symbol;Acc:HGNC:52042]	-
ENSG00000268663	0	0	0	0	0	0	0	0	0	WBP1LP6	1	674842	675265	+	424	processed_pseudogene	WW domain binding protein 1-like pseudogene 6 [Source:HGNC Symbol;Acc:HGNC:43956]	-
ENSG00000284662	0	0	0	0	0	0	0	0	0	OR4F16	1	685679	686673	-	995	protein_coding	olfactory receptor family 4 subfamily F member 16 [Source:HGNC Symbol;Acc:HGNC:15079]	-
ENSG00000229376	0	3	0	1	0	0	0	1	3	CICP3	1	722092	724903	+	2455	processed_pseudogene	capicua transcriptional repressor pseudogene 3 [Source:HGNC Symbol;Acc:HGNC:37742]	-
ENSG00000228327	23	30	10	21	15	17	9	11	16	AL669831.1	1	725885	778626	-	6432	transcribed_unprocessed_pseudogene	general transcription factor IIi (GTF2I) pseudogene	-
ENSG00000223181	0	0	0	0	0	0	0	0	0	RNU6-1199P	1	758233	758336	-	104	snRNA	RNA, U6 small nuclear 1199, pseudogene [Source:HGNC Symbol;Acc:HGNC:48162]	-
ENSG00000229905	0	0	0	0	0	0	0	0	0	AL669831.2	1	760911	761989	+	456	antisense	novel transcript	-
ENSG00000237491	15	13	14	8	11	9	11	7	14	AL669831.5	1	778770	810060	+	5517	lincRNA	novel transcript	-
ENSG00000285268	0	0	0	0	0	0	0	0	0	AL669831.7	1	781937	782050	+	114	transcribed_processed_pseudogene	novel septin family pseudogene	-
ENSG00000230092	4	4	5	2	4	1	7	4	8	AL669831.4	1	800879	817712	-	872	transcribed_unprocessed_pseudogene	F-box only protein 25 (FBXO25) pseudogene	-
ENSG00000177757	1	4	4	2	2	0	2	2	1	FAM87B	1	817371	819837	+	1947	lincRNA	family with sequence similarity 87 member B [Source:HGNC Symbol;Acc:HGNC:32236]	-
ENSG00000228794	241	250	295	241	301	286	258	273	238	LINC01128	1	825138	859446	+	9470	processed_transcript	long intergenic non-protein coding RNA 1128 [Source:HGNC Symbol;Acc:HGNC:49377]	-
ENSG00000225880	4	5	4	2	16	10	7	7	4	LINC00115	1	826206	827522	-	1317	lincRNA	long intergenic non-protein coding RNA 115 [Source:HGNC Symbol;Acc:HGNC:26211]	-
ENSG00000230368	0	0	0	0	0	0	0	0	0	FAM41C	1	868071	876903	-	1971	lincRNA	family with sequence similarity 41 member C [Source:HGNC Symbol;Acc:HGNC:27635]	-
ENSG00000234711	0	0	0	0	0	0	0	0	0	TUBB8P11	1	873292	874349	+	1058	unprocessed_pseudogene	tubulin beta 8 class VIII pseudogene 11 [Source:HGNC Symbol;Acc:HGNC:32337]	-
ENSG00000283040	0	0	0	0	0	0	0	0	0	AL669831.6	1	874529	877234	-	837	transcribed_unprocessed_pseudogene	FAM166A, pseudogene P3	-
ENSG00000272438	1	1	1	2	1	1	0	3	0	AL645608.6	1	904834	915976	+	351	lincRNA	novel transcript	-
ENSG00000230699	2	1	9	2	2	1	2	1	1	AL645608.2	1	911435	914948	+	3043	lincRNA	novel transcript	-
ENSG00000241180	0	0	0	0	0	0	1	0	0	AL645608.4	1	914171	914971	+	443	lincRNA	novel transcript	-
ENSG00000223764	12	27	32	45	57	69	22	17	24	LINC02593	1	916865	921016	-	4152	lincRNA	long intergenic non-protein coding RNA 2593 [Source:HGNC Symbol;Acc:HGNC:53933]	-
ENSG00000187634	29	37	40	40	86	47	25	29	40	SAMD11	1	923928	944581	+	4166	protein_coding	sterile alpha motif domain containing 11 [Source:HGNC Symbol;Acc:HGNC:28706]	-
ENSG00000188976	1857	1719	1921	2610	3261	3144	1705	2109	1732	NOC2L	1	944204	959309	-	5539	protein_coding	NOC2 like nucleolar associated transcriptional repressor [Source:HGNC Symbol;Acc:HGNC:24517]	-
ENSG00000187961	227	267	208	278	325	345	228	252	251	KLHL17	1	960587	965715	+	3395	protein_coding	kelch like family member 17 [Source:HGNC Symbol;Acc:HGNC:24023]	-
ENSG00000187583	111	104	117	217	222	256	111	110	84	PLEKHN1	1	966497	975865	+	2833	protein_coding	pleckstrin homology domain containing N1 [Source:HGNC Symbol;Acc:HGNC:25284]	-
ENSG00000187642	25	15	29	52	67	68	26	24	29	PERM1	1	975204	982093	-	3424	protein_coding	PPARGC1 and ESRR induced regulator, muscle 1 [Source:HGNC Symbol;Acc:HGNC:28208]	-
ENSG00000272512	0	2	3	2	2	0	1	4	0	AL645608.7	1	995966	998051	-	2086	lincRNA	novel transcript	-
ENSG00000188290	241	252	210	273	262	314	225	262	206	HES4	1	998962	1000172	-	1118	protein_coding	hes family bHLH transcription factor 4 [Source:HGNC Symbol;Acc:HGNC:24149]	bHLH
ENSG00000187608	7139	5614	3713	1320	1529	1683	3676	2495	2139	ISG15	1	1001138	1014540	+	941	protein_coding	ISG15 ubiquitin-like modifier [Source:HGNC Symbol;Acc:HGNC:4053]	-
ENSG00000231702	0	0	1	0	0	2	0	0	0	AL645608.3	1	1008076	1008229	-	154	processed_pseudogene	ribosomal protein L39 (RPL39) pseudogene	-
ENSG00000224969	3	0	1	0	2	0	0	1	5	AL645608.1	1	1011997	1013193	-	471	antisense	novel transcript	-
ENSG00000188157	9917	10470	8599	5733	7137	7401	9664	7537	8140	AGRN	1	1020123	1056118	+	10758	protein_coding	agrin [Source:HGNC Symbol;Acc:HGNC:329]	-
ENSG00000242590	0	0	0	0	0	0	0	0	0	AL645608.5	1	1055033	1056116	+	402	sense_intronic	novel transcript	-
ENSG00000217801	25	8	4	32	41	29	16	17	32	AL390719.1	1	1059734	1069355	+	2171	transcribed_unprocessed_pseudogene	uncharacterized LOC100288175 [Source:NCBI gene;Acc:100288175]	-
ENSG00000273443	3	0	7	0	2	4	1	0	0	AL645608.8	1	1062208	1063288	-	829	lincRNA	novel transcript	-
ENSG00000237330	0	0	0	0	0	0	0	0	0	RNF223	1	1070966	1074307	-	1902	protein_coding	ring finger protein 223 [Source:HGNC Symbol;Acc:HGNC:40020]	-
ENSG00000131591	151	205	214	185	208	239	160	191	166	C1orf159	1	1081818	1116361	-	6322	protein_coding	chromosome 1 open reading frame 159 [Source:HGNC Symbol;Acc:HGNC:26062]	-
ENSG00000285812	3	0	2	1	0	0	1	2	0	AL390719.3	1	1097585	1104598	+	1095	antisense	novel transcript, antisense to C1orf159	-
ENSG00000223823	0	0	0	0	0	0	0	0	0	LINC01342	1	1137017	1144056	+	1620	lincRNA	long intergenic non-protein coding RNA 1342 [Source:HGNC Symbol;Acc:HGNC:50551]	-
ENSG00000207730	0	0	0	0	0	0	0	0	0	MIR200B	1	1167104	1167198	+	95	miRNA	microRNA 200b [Source:HGNC Symbol;Acc:HGNC:31579]	-
ENSG00000207607	0	0	0	0	0	0	0	0	0	MIR200A	1	1167863	1167952	+	90	miRNA	microRNA 200a [Source:HGNC Symbol;Acc:HGNC:31578]	-
ENSG00000198976	0	0	0	0	0	0	0	0	0	MIR429	1	1169005	1169087	+	83	miRNA	microRNA 429 [Source:HGNC Symbol;Acc:HGNC:13784]	-
ENSG00000272141	0	0	0	0	0	0	0	0	0	AL390719.2	1	1169357	1170343	+	987	lincRNA	novel transcript	-
ENSG00000205231	0	0	0	0	0	0	0	0	0	TTLL10-AS1	1	1173056	1179555	-	3532	antisense	TTLL10 antisense RNA 1 [Source:HGNC Symbol;Acc:HGNC:41159]	-
ENSG00000162571	0	0	0	0	1	0	0	0	0	TTLL10	1	1173884	1197935	+	3943	protein_coding	tubulin tyrosine ligase like 10 [Source:HGNC Symbol;Acc:HGNC:26693]	-
ENSG00000186891	0	1	0	5	2	3	2	0	0	TNFRSF18	1	1203508	1206691	-	1370	protein_coding	TNF receptor superfamily member 18 [Source:HGNC Symbol;Acc:HGNC:11914]	-
ENSG00000186827	3	1	1	2	1	2	1	0	2	TNFRSF4	1	1211326	1214138	-	1721	protein_coding	TNF receptor superfamily member 4 [Source:HGNC Symbol;Acc:HGNC:11918]	-
ENSG00000078808	7925	9433	8226	7049	8078	8529	9942	9580	9517	SDF4	1	1216908	1232031	-	4709	protein_coding	stromal cell derived factor 4 [Source:HGNC Symbol;Acc:HGNC:24188]	-
ENSG00000176022	1022	1083	1175	1103	1262	1375	1221	1265	1170	B3GALT6	1	1232226	1235041	+	2816	protein_coding	beta-1,3-galactosyltransferase 6 [Source:HGNC Symbol;Acc:HGNC:17978]	-
ENSG00000184163	32	28	22	16	19	17	44	28	18	C1QTNF12	1	1242446	1246722	-	1794	protein_coding	C1q and TNF related 12 [Source:HGNC Symbol;Acc:HGNC:32308]	-
ENSG00000260179	4	2	1	1	5	5	2	0	5	AL162741.1	1	1249777	1251334	-	1558	lincRNA	novel transcript	-
ENSG00000160087	896	1096	949	1198	1416	1337	1056	1099	1021	UBE2J2	1	1253909	1273885	-	4712	protein_coding	ubiquitin conjugating enzyme E2 J2 [Source:HGNC Symbol;Acc:HGNC:19268]	-
ENSG00000230415	9	5	4	0	1	2	7	5	0	LINC01786	1	1275223	1280420	+	513	lincRNA	long intergenic non-protein coding RNA 1786 [Source:HGNC Symbol;Acc:HGNC:52575]	-
ENSG00000162572	45	39	32	20	21	25	34	22	43	SCNN1D	1	1280436	1292029	+	4025	protein_coding	sodium channel epithelial 1 delta subunit [Source:HGNC Symbol;Acc:HGNC:10601]	-
ENSG00000131584	715	777	896	931	1066	1102	764	835	755	ACAP3	1	1292376	1309609	-	8809	protein_coding	ArfGAP with coiled-coil, ankyrin repeat and PH domains 3 [Source:HGNC Symbol;Acc:HGNC:16754]	-
ENSG00000278073	0	0	0	0	0	0	0	0	0	MIR6726	1	1296110	1296170	-	61	miRNA	microRNA 6726 [Source:HGNC Symbol;Acc:HGNC:50009]	-
ENSG00000169972	340	317	337	450	431	435	340	352	283	PUSL1	1	1308567	1311677	+	2489	protein_coding	pseudouridylate synthase like 1 [Source:HGNC Symbol;Acc:HGNC:26914]	-
ENSG00000127054	1175	1133	1102	1215	1460	1437	1142	1198	1188	INTS11	1	1311585	1324691	-	8220	protein_coding	integrator complex subunit 11 [Source:HGNC Symbol;Acc:HGNC:26052]	-
ENSG00000283712	0	0	0	0	0	0	0	0	0	MIR6727	1	1312502	1312566	-	65	miRNA	microRNA 6727 [Source:HGNC Symbol;Acc:HGNC:50171]	-
ENSG00000240731	31	19	19	27	26	29	20	13	28	AL139287.1	1	1317581	1318689	-	386	sense_intronic	novel transcript	-
ENSG00000224051	721	811	782	903	1016	1027	652	831	729	CPTP	1	1324756	1328897	+	2556	protein_coding	ceramide-1-phosphate transfer protein [Source:HGNC Symbol;Acc:HGNC:28116]	-
ENSG00000169962	3	9	12	8	13	4	12	7	7	TAS1R3	1	1331314	1335306	+	3433	protein_coding	taste 1 receptor member 3 [Source:HGNC Symbol;Acc:HGNC:15661]	-
ENSG00000107404	1148	1149	1169	1514	2085	2004	1224	1274	1280	DVL1	1	1335276	1349350	-	3814	protein_coding	dishevelled segment polarity protein 1 [Source:HGNC Symbol;Acc:HGNC:3084]	-
ENSG00000284372	0	0	0	0	0	0	0	0	0	MIR6808	1	1339650	1339708	-	59	miRNA	microRNA 6808 [Source:HGNC Symbol;Acc:HGNC:50046]	-
ENSG00000162576	5710	6688	6570	6571	7766	7713	6614	5741	6555	MXRA8	1	1352689	1361777	-	3622	protein_coding	matrix remodeling associated 8 [Source:HGNC Symbol;Acc:HGNC:7542]	-
ENSG00000175756	1387	1559	1570	1886	2136	2245	1589	1765	1716	AURKAIP1	1	1373730	1375495	-	1669	protein_coding	aurora kinase A interacting protein 1 [Source:HGNC Symbol;Acc:HGNC:24114]	-
ENSG00000223663	0	0	3	1	1	1	1	0	0	NDUFB4P8	1	1378666	1379032	+	367	processed_pseudogene	NADH:ubiquinone oxidoreductase subunit B4 pseudogene 8 [Source:HGNC Symbol;Acc:HGNC:45256]	-
ENSG00000221978	1321	1365	1355	1263	1388	1452	1348	1420	1373	CCNL2	1	1385711	1399328	-	6850	protein_coding	cyclin L2 [Source:HGNC Symbol;Acc:HGNC:20570]	-
ENSG00000224870	262	278	261	225	259	330	305	307	279	AL391244.1	1	1399522	1402046	+	2525	processed_transcript	uncharacterized LOC148413 [Source:NCBI gene;Acc:148413]	-
ENSG00000242485	843	862	943	1287	1526	1474	996	1072	986	MRPL20	1	1401908	1407313	-	2788	protein_coding	mitochondrial ribosomal protein L20 [Source:HGNC Symbol;Acc:HGNC:14478]	-
ENSG00000264293	0	0	0	0	0	0	0	0	0	RN7SL657P	1	1405460	1405752	-	293	misc_RNA	RNA, 7SL, cytoplasmic 657, pseudogene [Source:HGNC Symbol;Acc:HGNC:46673]	-
ENSG00000272455	34	41	32	41	36	40	23	37	35	AL391244.3	1	1409096	1410618	+	1523	lincRNA	novel transcript	-
ENSG00000235098	2	3	4	5	3	4	3	2	3	ANKRD65	1	1418420	1421769	-	2644	protein_coding	ankyrin repeat domain 65 [Source:HGNC Symbol;Acc:HGNC:42950]	-
ENSG00000225905	0	0	0	0	0	0	0	0	0	AL391244.2	1	1420245	1422691	+	543	antisense	novel transcript	-
ENSG00000205116	0	0	0	0	0	0	0	0	0	TMEM88B	1	1426128	1427787	+	492	protein_coding	transmembrane protein 88B [Source:HGNC Symbol;Acc:HGNC:37099]	-
ENSG00000225285	2	0	0	0	0	1	1	0	1	LINC01770	1	1430539	1434573	-	851	lincRNA	long intergenic non-protein coding RNA 1770 [Source:HGNC Symbol;Acc:HGNC:52560]	-
ENSG00000179403	52	105	91	47	58	79	101	89	111	VWA1	1	1434861	1442882	+	5065	protein_coding	von Willebrand factor A domain containing 1 [Source:HGNC Symbol;Acc:HGNC:30910]	-
ENSG00000215915	0	0	0	0	0	1	0	0	0	ATAD3C	1	1449689	1470158	+	3976	protein_coding	ATPase family, AAA domain containing 3C [Source:HGNC Symbol;Acc:HGNC:32151]	-
ENSG00000160072	390	368	455	701	827	963	364	486	404	ATAD3B	1	1471769	1497848	+	7682	protein_coding	ATPase family, AAA domain containing 3B [Source:HGNC Symbol;Acc:HGNC:24007]	-
ENSG00000284740	14	12	6	13	7	9	11	13	11	AL645728.2	1	1503250	1509452	+	660	transcribed_unprocessed_pseudogene	ATPase family, AAA domain containing 3C (ATAD3C) pseudogene	-
ENSG00000197785	820	862	851	1214	1459	1563	885	864	820	ATAD3A	1	1512151	1534687	+	3069	protein_coding	ATPase family, AAA domain containing 3A [Source:HGNC Symbol;Acc:HGNC:25567]	-
ENSG00000205090	58	63	59	46	59	35	70	66	61	TMEM240	1	1535174	1540453	-	1380	protein_coding	transmembrane protein 240 [Source:HGNC Symbol;Acc:HGNC:25186]	-
ENSG00000160075	1965	2153	1980	1999	2547	2630	2288	2406	2356	SSU72	1	1541673	1574869	-	6925	protein_coding	SSU72 homolog, RNA polymerase II CTD phosphatase [Source:HGNC Symbol;Acc:HGNC:25016]	-
ENSG00000215014	30	28	35	14	24	32	32	43	55	AL645728.1	1	1574102	1577075	+	2349	processed_transcript	novel transcript	-
ENSG00000274481	0	0	0	0	0	0	0	0	0	AL691432.3	1	1583510	1583909	-	400	processed_pseudogene	sulfiredoxin 1 (SRXN1) pseudogene	-
ENSG00000228594	372	339	236	242	283	291	357	337	367	FNDC10	1	1598012	1600096	-	2085	protein_coding	fibronectin type III domain containing 10 [Source:HGNC Symbol;Acc:HGNC:42951]	-
ENSG00000272106	76	58	84	57	63	69	49	75	77	AL691432.2	1	1613758	1615795	-	2038	antisense	artifact	-
ENSG00000197530	1059	1113	985	656	815	770	1232	1123	1195	MIB2	1	1615415	1630610	+	8767	protein_coding	mindbomb E3 ubiquitin protein ligase 2 [Source:HGNC Symbol;Acc:HGNC:30577]	-
ENSG00000189409	17	7	4	10	8	14	13	64	2	MMP23B	1	1632095	1635263	+	2273	protein_coding	matrix metallopeptidase 23B [Source:HGNC Symbol;Acc:HGNC:7171]	-
ENSG00000248333	520	554	516	571	722	659	508	635	534	CDK11B	1	1635227	1659012	-	3488	protein_coding	cyclin dependent kinase 11B [Source:HGNC Symbol;Acc:HGNC:1729]	-
ENSG00000272004	1	1	0	0	0	2	1	0	0	FO704657.1	1	1659325	1662602	+	400	antisense	novel transcript, antisense to SLC35E2B	-
ENSG00000189339	906	922	831	656	892	866	957	822	870	SLC35E2B	1	1659529	1692728	-	8395	protein_coding	solute carrier family 35 member E2B [Source:HGNC Symbol;Acc:HGNC:33941]	-
ENSG00000269737	11	7	8	1	6	7	9	5	4	AL691432.1	1	1671990	1674397	+	1819	transcribed_processed_pseudogene	ribosomal protein S7 (RPS7) pseudogene	-
ENSG00000215914	6	9	6	10	12	11	20	16	11	MMP23A	1	1699942	1701782	+	1017	unprocessed_pseudogene	matrix metallopeptidase 23A (pseudogene) [Source:HGNC Symbol;Acc:HGNC:7170]	-
ENSG00000008128	6	4	6	11	6	10	5	5	6	CDK11A	1	1702730	1724324	-	4701	protein_coding	cyclin dependent kinase 11A [Source:HGNC Symbol;Acc:HGNC:1730]	-
ENSG00000268575	27	39	31	24	21	22	36	20	21	AL031282.2	1	1702736	1737688	-	5079	processed_transcript	novel transcript, readthrough between SLC35E2 and CDK11A	-
ENSG00000227775	3	2	3	3	2	7	4	4	0	AL031282.1	1	1724512	1737251	+	2759	transcribed_processed_pseudogene	ribosomal protein S7 (RPS7) pseudogene	-
ENSG00000215790	436	425	379	341	365	422	436	405	441	SLC35E2A	1	1724838	1745999	-	7713	protein_coding	solute carrier family 35 member E2A [Source:HGNC Symbol;Acc:HGNC:20863]	-
ENSG00000008130	1183	1304	1216	1117	1352	1322	1290	1350	1232	NADK	1	1751232	1780457	-	5570	protein_coding	NAD kinase [Source:HGNC Symbol;Acc:HGNC:29831]	-
ENSG00000078369	10020	10216	10135	12016	14567	14721	10702	10665	10676	GNB1	1	1785285	1891117	-	6417	protein_coding	G protein subunit beta 1 [Source:HGNC Symbol;Acc:HGNC:4396]	-
ENSG00000231050	11	2	3	7	14	5	4	6	14	AL109917.1	1	1891471	1892658	+	906	antisense	collagen alpha-2(VIII) chain [Source:NCBI gene;Acc:105378949]	-
ENSG00000169885	11	5	10	2	1	8	6	5	8	CALML6	1	1914827	1917296	+	2321	protein_coding	calmodulin like 6 [Source:HGNC Symbol;Acc:HGNC:24193]	-
ENSG00000178821	1	1	1	0	5	6	0	3	0	TMEM52	1	1917590	1919273	-	1594	protein_coding	transmembrane protein 52 [Source:HGNC Symbol;Acc:HGNC:27916]	-
ENSG00000142609	0	0	0	0	0	0	0	1	0	CFAP74	1	1921951	2003837	-	10422	protein_coding	cilia and flagella associated protein 74 [Source:HGNC Symbol;Acc:HGNC:29368]	-
ENSG00000233542	0	0	0	0	0	0	0	0	0	AL391845.2	1	2013213	2015530	-	1954	antisense	novel transcript	-
ENSG00000187730	0	0	0	0	0	0	0	0	0	GABRD	1	2019298	2030758	+	5556	protein_coding	gamma-aminobutyric acid type A receptor delta subunit [Source:HGNC Symbol;Acc:HGNC:4084]	-
ENSG00000226969	0	0	0	0	0	0	0	0	0	AL391845.1	1	2049203	2050070	-	538	antisense	uncharacterized LOC105378591 [Source:NCBI gene;Acc:105378591]	-
ENSG00000067606	30	48	30	40	34	36	32	30	32	PRKCZ	1	2050470	2185395	+	7636	protein_coding	protein kinase C zeta [Source:HGNC Symbol;Acc:HGNC:9412]	-
ENSG00000271806	0	0	0	0	0	1	1	2	0	AL590822.2	1	2141084	2145279	-	4196	antisense	novel transcript, antisense PRKCZ	-
ENSG00000182873	37	31	28	26	28	21	34	28	40	PRKCZ-AS1	1	2181794	2184389	-	1734	antisense	PRKCZ antisense RNA 1 [Source:HGNC Symbol;Acc:HGNC:40477]	-
ENSG00000162585	1014	1072	1013	1008	1152	1211	1084	1193	1160	FAAP20	1	2184461	2212720	-	10916	protein_coding	FA core complex associated protein 20 [Source:HGNC Symbol;Acc:HGNC:26428]	-
ENSG00000234396	0	0	0	1	0	0	0	2	0	AL590822.1	1	2212523	2220738	+	326	lincRNA	novel transcript	-
ENSG00000157933	2763	2785	2602	1984	2376	2509	2975	2589	2769	SKI	1	2228695	2310119	+	6080	protein_coding	SKI proto-oncogene [Source:HGNC Symbol;Acc:HGNC:10896]	-
ENSG00000116151	104	93	96	77	86	116	110	110	111	MORN1	1	2321253	2391707	-	11337	protein_coding	MORN repeat containing 1 [Source:HGNC Symbol;Acc:HGNC:25852]	-
ENSG00000272161	0	0	0	0	0	0	0	1	0	AL589739.1	1	2326201	2326693	-	493	sense_intronic	novel transcript, sense intronic to MORN1	-
ENSG00000269896	19	20	14	11	15	15	24	9	17	AL513477.1	1	2350414	2352820	-	2407	transcribed_processed_pseudogene	small nuclear ribonucleoprotein polypeptide N pseudogene [Source:NCBI gene;Acc:100129534]	-
ENSG00000272420	2	6	1	0	0	2	0	3	0	AL513477.2	1	2363061	2363628	-	568	sense_intronic	novel transcript, sense intronic to MORN1	-
ENSG00000157916	2440	2685	2620	2601	2889	3053	2772	2921	2816	RER1	1	2391775	2405444	+	5691	protein_coding	retention in endoplasmic reticulum sorting receptor 1 [Source:HGNC Symbol;Acc:HGNC:30309]	-
ENSG00000157911	336	420	358	449	500	477	382	429	368	PEX10	1	2403964	2413797	-	3789	protein_coding	peroxisomal biogenesis factor 10 [Source:HGNC Symbol;Acc:HGNC:8851]	-
ENSG00000149527	2	2	5	4	4	2	4	4	6	PLCH2	1	2425980	2505530	+	10781	protein_coding	phospholipase C eta 2 [Source:HGNC Symbol;Acc:HGNC:29037]	-
ENSG00000224387	3	0	0	0	1	0	0	0	0	AL139246.1	1	2492300	2493258	-	455	antisense	novel transcript	-
ENSG00000229393	0	0	0	0	0	0	0	0	0	AL139246.4	1	2493437	2494479	-	514	antisense	novel transcript	-
ENSG00000157881	424	431	397	468	598	615	503	469	446	PANK4	1	2508533	2526628	-	5107	protein_coding	pantothenate kinase 4 [Source:HGNC Symbol;Acc:HGNC:19366]	-
ENSG00000197921	0	0	0	2	0	0	0	0	0	HES5	1	2528745	2530245	-	1306	protein_coding	hes family bHLH transcription factor 5 [Source:HGNC Symbol;Acc:HGNC:19764]	bHLH
ENSG00000272449	10	6	9	17	8	8	9	6	5	AL139246.5	1	2530064	2547460	+	1531	lincRNA	novel transcript	-
ENSG00000238164	0	0	0	0	1	0	0	0	0	TNFRSF14-AS1	1	2549920	2557031	-	6137	antisense	TNFRSF14 antisense RNA 1 [Source:HGNC Symbol;Acc:HGNC:26966]	-
ENSG00000157873	140	144	116	73	89	94	128	131	107	TNFRSF14	1	2555639	2565382	+	6219	protein_coding	TNF receptor superfamily member 14 [Source:HGNC Symbol;Acc:HGNC:11912]	-
ENSG00000225931	0	1	1	0	0	0	0	0	1	AL139246.2	1	2566410	2569888	+	1297	TEC	novel transcript	-
ENSG00000228037	0	0	0	0	0	0	0	1	2	AL139246.3	1	2581560	2584533	+	626	lincRNA	uncharacterized LOC100996583 [Source:NCBI gene;Acc:100996583]	-
ENSG00000157870	630	585	608	857	1104	1049	575	639	577	PRXL2B	1	2586491	2591469	+	3371	protein_coding	peroxiredoxin like 2B [Source:HGNC Symbol;Acc:HGNC:28390]	-
ENSG00000142606	0	0	0	0	2	3	0	1	2	MMEL1	1	2590639	2632990	-	3844	protein_coding	membrane metalloendopeptidase like 1 [Source:HGNC Symbol;Acc:HGNC:14668]	-
ENSG00000237058	0	0	0	0	0	0	0	0	0	AL831784.1	1	2632568	2636620	+	373	antisense	novel transcript	-
ENSG00000215912	4	8	4	10	13	5	9	6	10	TTC34	1	2635976	2801717	-	8814	protein_coding	tetratricopeptide repeat domain 34 [Source:HGNC Symbol;Acc:HGNC:34297]	-
ENSG00000285945	0	0	0	0	0	0	0	0	0	AC242022.2	1	2768091	2784733	+	593	lincRNA	novel transcript, antisense to TTC34	-
ENSG00000283259	0	0	0	0	0	0	0	0	0	AC242022.1	1	2773603	2776473	+	1565	antisense	novel transcript, antisense to TTC34	-
ENSG00000233234	0	0	0	0	0	0	0	0	0	AL592464.2	1	2811850	2812692	-	607	lincRNA	novel transcript	-
ENSG00000231630	0	0	0	0	0	0	0	0	0	AL592464.1	1	2814432	2814998	-	429	lincRNA	novel transcript	-
ENSG00000284745	0	0	0	0	0	0	0	0	0	AL589702.1	1	2960658	2968707	-	1654	lincRNA	novel transcript	-
ENSG00000169717	0	0	0	0	0	0	0	0	0	ACTRT2	1	3021483	3022903	+	1421	protein_coding	actin related protein T2 [Source:HGNC Symbol;Acc:HGNC:24026]	-
ENSG00000177133	0	0	0	0	0	0	0	0	0	LINC00982	1	3059615	3068437	-	5600	antisense	long intergenic non-protein coding RNA 982 [Source:HGNC Symbol;Acc:HGNC:48664]	-
ENSG00000142611	0	0	0	0	2	1	0	0	0	PRDM16	1	3069168	3438621	+	9767	protein_coding	PR/SET domain 16 [Source:HGNC Symbol;Acc:HGNC:14000]	zf-C2H2
ENSG00000283572	0	0	0	0	0	0	0	0	0	MIR4251	1	3127975	3128035	+	61	miRNA	microRNA 4251 [Source:HGNC Symbol;Acc:HGNC:38370]	-
ENSG00000226286	0	0	0	0	0	0	0	0	0	AL008733.1	1	3132927	3133709	-	469	antisense	novel transcript	-
ENSG00000279839	0	0	0	0	0	0	0	0	0	AL512383.1	1	3205988	3208664	+	2677	TEC	TEC	-
ENSG00000272235	0	0	0	0	0	0	0	0	0	AL590438.1	1	3306636	3310096	-	3461	lincRNA	novel transcript	-
ENSG00000130762	0	0	0	0	1	0	0	0	0	ARHGEF16	1	3454426	3481113	+	5563	protein_coding	Rho guanine nucleotide exchange factor 16 [Source:HGNC Symbol;Acc:HGNC:15515]	-
ENSG00000272088	0	0	0	0	0	0	0	0	0	AL512413.1	1	3487246	3487627	+	382	lincRNA	novel transcript	-
ENSG00000162591	376	477	405	267	312	318	446	342	410	MEGF6	1	3489920	3611495	-	7039	protein_coding	multiple EGF like domains 6 [Source:HGNC Symbol;Acc:HGNC:3232]	-
ENSG00000207776	0	0	0	0	0	0	0	0	0	MIR551A	1	3560695	3560790	-	96	miRNA	microRNA 551a [Source:HGNC Symbol;Acc:HGNC:32806]	-
ENSG00000238260	4	1	2	1	0	6	2	4	5	AL513320.1	1	3623190	3624743	-	622	antisense	novel transcript	-
ENSG00000158109	2772	2665	2493	2590	3324	3307	2749	2868	2870	TPRG1L	1	3625002	3630127	+	2414	protein_coding	tumor protein p63 regulated 1 like [Source:HGNC Symbol;Acc:HGNC:27007]	-
ENSG00000116213	215	232	229	259	251	291	231	228	229	WRAP73	1	3630767	3652761	-	7604	protein_coding	WD repeat containing, antisense to TP73 [Source:HGNC Symbol;Acc:HGNC:12759]	-
ENSG00000078900	2	0	1	2	0	1	2	2	0	TP73	1	3652520	3736201	+	6763	protein_coding	tumor protein p73 [Source:HGNC Symbol;Acc:HGNC:12003]	P53
ENSG00000227589	0	0	0	0	0	0	0	0	0	AL136528.1	1	3658938	3668772	-	754	antisense	novel transcript	-
ENSG00000235131	0	0	0	0	0	0	0	0	0	AL136528.2	1	3712200	3714298	-	351	antisense	novel transcript	-
ENSG00000227372	504	520	401	350	456	481	521	476	485	TP73-AS1	1	3735511	3747373	-	9701	transcribed_unitary_pseudogene	TP73 antisense RNA 1 [Source:HGNC Symbol;Acc:HGNC:29052]	-
ENSG00000276189	0	0	0	0	0	0	0	0	0	RF02197	1	3736943	3737103	+	161	misc_RNA		-
ENSG00000162592	1	0	0	0	0	1	0	1	0	CCDC27	1	3746460	3771645	+	4285	protein_coding	coiled-coil domain containing 27 [Source:HGNC Symbol;Acc:HGNC:26546]	-
ENSG00000235169	43	42	37	23	22	20	38	36	46	SMIM1	1	3772761	3775982	+	981	protein_coding	small integral membrane protein 1 (Vel blood group) [Source:HGNC Symbol;Acc:HGNC:44204]	-
ENSG00000130764	910	1012	1058	1159	1376	1296	1035	1072	1003	LRRC47	1	3778558	3796504	-	4516	protein_coding	leucine rich repeat containing 47 [Source:HGNC Symbol;Acc:HGNC:29207]	-
ENSG00000266075	1	0	0	1	0	0	0	0	1	RN7SL574P	1	3782815	3783111	+	297	misc_RNA	RNA, 7SL, cytoplasmic 574, pseudogene [Source:HGNC Symbol;Acc:HGNC:46590]	-
ENSG00000272153	8	3	5	3	3	2	2	3	11	AL365330.1	1	3785008	3785538	+	531	antisense	novel transcript, antisense to LRRC47	-
ENSG00000116198	766	810	872	845	956	984	826	790	884	CEP104	1	3812081	3857214	-	7876	protein_coding	centrosomal protein 104 [Source:HGNC Symbol;Acc:HGNC:24866]	-
ENSG00000169598	96	96	96	81	81	99	85	99	80	DFFB	1	3857267	3885429	+	3870	protein_coding	DNA fragmentation factor subunit beta [Source:HGNC Symbol;Acc:HGNC:2773]	-
ENSG00000198912	231	253	242	237	347	325	246	278	273	C1orf174	1	3889125	3900293	-	4388	protein_coding	chromosome 1 open reading frame 174 [Source:HGNC Symbol;Acc:HGNC:27915]	-
ENSG00000236423	21	33	22	23	15	23	22	32	23	LINC01134	1	3900372	3917225	+	4064	lincRNA	long intergenic non-protein coding RNA 1134 [Source:HGNC Symbol;Acc:HGNC:49449]	-
ENSG00000233304	0	0	1	0	0	0	0	0	0	LINC01346	1	3940565	3955262	+	3894	lincRNA	long intergenic non-protein coding RNA 1346 [Source:HGNC Symbol;Acc:HGNC:50563]	-
ENSG00000226374	0	0	0	0	0	0	0	0	0	LINC01345	1	3944547	3948980	-	1852	lincRNA	long intergenic non-protein coding RNA 1345 [Source:HGNC Symbol;Acc:HGNC:50564]	-
ENSG00000284668	0	0	0	0	0	0	0	0	0	AL805961.1	1	3976133	4012699	+	1830	lincRNA	uncharacterized LOC105376673 [Source:NCBI gene;Acc:105376673]	-
ENSG00000284703	0	0	0	0	0	0	0	0	0	AL805961.2	1	4012921	4019508	-	4817	lincRNA	novel transcript	-
ENSG00000229280	0	0	0	0	0	0	0	0	0	EEF1DP6	1	4175528	4175899	-	372	processed_pseudogene	eukaryotic translation elongation factor 1 delta pseudogene 6 [Source:HGNC Symbol;Acc:HGNC:51456]	-
ENSG00000235054	0	0	0	0	0	0	0	0	0	LINC01777	1	4412027	4424689	+	2104	lincRNA	long intergenic non-protein coding RNA 1777 [Source:HGNC Symbol;Acc:HGNC:52567]	-
ENSG00000284694	0	0	0	0	0	0	0	0	0	AL355602.1	1	4479131	4484375	-	3402	lincRNA	novel transcript	-
ENSG00000227169	0	0	0	0	0	0	0	0	0	Z98747.1	1	4551735	4552145	-	356	lincRNA	novel transcript	-
ENSG00000232596	0	0	0	0	0	0	0	0	0	LINC01646	1	4571481	4594009	+	1994	lincRNA	long intergenic non-protein coding RNA 1646 [Source:HGNC Symbol;Acc:HGNC:52433]	-
ENSG00000196581	0	0	0	0	0	0	0	0	0	AJAP1	1	4654732	4792534	+	12405	protein_coding	adherens junctions associated protein 1 [Source:HGNC Symbol;Acc:HGNC:30801]	-
ENSG00000284739	0	0	0	0	0	0	0	0	0	BX005132.2	1	4963954	4973298	-	464	lincRNA	novel transcript	-
ENSG00000284674	0	0	0	0	0	0	0	0	0	BX005132.1	1	4973381	4981568	+	1580	lincRNA	uncharacterized LOC105376680 [Source:NCBI gene;Acc:105376680]	-
ENSG00000231510	0	0	0	0	0	0	0	0	0	AL691497.1	1	5086459	5090899	-	449	lincRNA	novel transcript	-
ENSG00000284616	0	0	0	0	0	0	0	0	0	AL139823.1	1	5301928	5307394	-	1225	lincRNA	novel transcript	-
ENSG00000284692	0	0	0	0	0	0	0	0	0	Z98259.3	1	5478736	5493057	-	2316	lincRNA	uncharacterized LOC105376686 [Source:NCBI gene;Acc:105376686]	-
ENSG00000284666	0	0	0	0	0	0	0	0	0	Z98259.2	1	5480787	5482028	-	609	lincRNA	novel transcript	-
ENSG00000260972	0	0	0	0	0	0	0	0	0	Z98259.1	1	5492978	5494674	+	1697	lincRNA	novel transcript	-
ENSG00000283356	0	0	0	0	0	0	0	0	0	Z97988.1	1	5554747	5554881	+	135	unprocessed_pseudogene	mitochondrially encoded cytochrome c oxidase III (MT-CO3) pseudogene	-
ENSG00000236948	0	0	0	0	0	0	0	0	0	AL365255.1	1	5561709	5668295	-	1095	lincRNA	novel transcript	-
ENSG00000264341	0	0	0	0	0	0	0	0	0	MIR4417	1	5564071	5564143	+	73	miRNA	microRNA 4417 [Source:HGNC Symbol;Acc:HGNC:41535]	-
ENSG00000264101	0	0	0	0	0	0	1	0	0	MIR4689	1	5862672	5862741	-	70	miRNA	microRNA 4689 [Source:HGNC Symbol;Acc:HGNC:41895]	-
ENSG00000131697	181	186	176	130	154	167	199	208	186	NPHP4	1	5862811	5992473	-	13167	protein_coding	nephrocystin 4 [Source:HGNC Symbol;Acc:HGNC:19104]	-
ENSG00000069424	336	350	313	204	248	256	368	341	362	KCNAB2	1	5991466	6101193	+	9534	protein_coding	potassium voltage-gated channel subfamily A regulatory beta subunit 2 [Source:HGNC Symbol;Acc:HGNC:6229]	-
ENSG00000116254	15	4	10	7	7	7	15	17	14	CHD5	1	6101793	6180123	-	9890	protein_coding	chromodomain helicase DNA binding protein 5 [Source:HGNC Symbol;Acc:HGNC:16816]	-
ENSG00000285629	0	0	0	0	0	0	0	0	0	AL031847.2	1	6159430	6197757	-	663	protein_coding	novel transcript	-
ENSG00000116251	1697	2001	1927	1647	1787	1883	2083	2121	2065	RPL22	1	6185020	6209389	-	4682	protein_coding	ribosomal protein L22 [Source:HGNC Symbol;Acc:HGNC:10315]	-
ENSG00000226944	0	0	11	2	6	2	4	4	1	AL031847.1	1	6204840	6205780	-	378	antisense	uncharacterized LOC102724450 [Source:NCBI gene;Acc:102724450]	-
ENSG00000158286	166	124	129	102	109	122	142	119	122	RNF207	1	6205475	6221299	+	6585	protein_coding	ring finger protein 207 [Source:HGNC Symbol;Acc:HGNC:32947]	-
ENSG00000116237	2624	2673	2576	2608	3452	3446	2818	2732	2762	ICMT	1	6221193	6235972	-	4910	protein_coding	isoprenylcysteine carboxyl methyltransferase [Source:HGNC Symbol;Acc:HGNC:5350]	-
ENSG00000225077	2	0	0	3	6	1	7	0	2	LINC00337	1	6234692	6239444	+	2358	lincRNA	long intergenic non-protein coding RNA 337 [Source:HGNC Symbol;Acc:HGNC:28620]	-
ENSG00000173673	0	0	0	0	0	0	0	0	0	HES3	1	6244192	6245578	+	697	protein_coding	hes family bHLH transcription factor 3 [Source:HGNC Symbol;Acc:HGNC:26226]	bHLH
ENSG00000158292	194	164	182	123	146	137	209	161	180	GPR153	1	6247346	6260975	-	4082	protein_coding	G protein-coupled receptor 153 [Source:HGNC Symbol;Acc:HGNC:23618]	-
ENSG00000097021	1613	1498	1668	2226	2562	2682	1527	1917	1691	ACOT7	1	6264269	6394391	-	4124	protein_coding	acyl-CoA thioesterase 7 [Source:HGNC Symbol;Acc:HGNC:24157]	-
ENSG00000271746	0	0	0	0	0	0	0	0	0	AL031848.2	1	6393555	6394391	+	837	antisense	novel transcript, antisense to ACOT7	-
ENSG00000069812	2	2	4	3	0	2	2	4	2	HES2	1	6412418	6424670	-	5407	protein_coding	hes family bHLH transcription factor 2 [Source:HGNC Symbol;Acc:HGNC:16005]	bHLH
ENSG00000187017	0	3	2	1	0	1	0	1	0	ESPN	1	6424776	6461367	+	6952	protein_coding	espin [Source:HGNC Symbol;Acc:HGNC:13281]	-
ENSG00000265392	0	0	0	0	0	0	0	0	0	MIR4252	1	6429834	6429896	-	63	miRNA	microRNA 4252 [Source:HGNC Symbol;Acc:HGNC:38384]	-
ENSG00000231868	0	0	0	0	0	0	0	0	0	AL031848.1	1	6443034	6447006	-	351	antisense	novel transcript, antisense to ESPN	-
ENSG00000215788	81	52	85	81	59	84	65	71	67	TNFRSF25	1	6460786	6466195	-	4283	protein_coding	TNF receptor superfamily member 25 [Source:HGNC Symbol;Acc:HGNC:11910]	-
ENSG00000171680	546	485	574	667	805	810	540	544	545	PLEKHG5	1	6466092	6520061	-	7053	protein_coding	pleckstrin homology and RhoGEF domain containing G5 [Source:HGNC Symbol;Acc:HGNC:29105]	-
ENSG00000162408	499	390	447	569	613	626	406	421	392	NOL9	1	6521347	6554535	-	7293	protein_coding	nucleolar protein 9 [Source:HGNC Symbol;Acc:HGNC:26265]	-
ENSG00000253022	0	0	0	0	0	0	0	0	0	RNU6-731P	1	6540854	6540964	+	111	snRNA	RNA, U6 small nuclear 731, pseudogene [Source:HGNC Symbol;Acc:HGNC:47694]	-
ENSG00000229519	2	1	2	1	0	4	0	0	0	AL591866.1	1	6547905	6548619	+	401	processed_pseudogene	ribosomal protein L34 (RPL34) pseudogene	-
ENSG00000173662	0	0	0	0	0	0	0	0	0	TAS1R1	1	6555181	6579757	+	2892	protein_coding	taste 1 receptor member 1 [Source:HGNC Symbol;Acc:HGNC:14448]	-
ENSG00000204859	216	164	143	149	177	157	139	171	183	ZBTB48	1	6580001	6589280	+	4503	protein_coding	zinc finger and BTB domain containing 48 [Source:HGNC Symbol;Acc:HGNC:4930]	ZBTB
ENSG00000162413	2797	3027	2982	2877	3667	3490	2979	2703	2833	KLHL21	1	6590724	6614607	-	6901	protein_coding	kelch like family member 21 [Source:HGNC Symbol;Acc:HGNC:29041]	-
ENSG00000116273	684	626	549	584	655	734	702	554	596	PHF13	1	6613685	6624033	+	3681	protein_coding	PHD finger protein 13 [Source:HGNC Symbol;Acc:HGNC:22983]	-
ENSG00000041988	211	195	249	264	293	315	225	210	262	THAP3	1	6624866	6635586	+	4072	protein_coding	THAP domain containing 3 [Source:HGNC Symbol;Acc:HGNC:20855]	THAP
ENSG00000007923	812	766	779	838	1039	1143	785	828	753	DNAJC11	1	6634168	6701924	-	5083	protein_coding	DnaJ heat shock protein family (Hsp40) member C11 [Source:HGNC Symbol;Acc:HGNC:25570]	-
ENSG00000228750	0	0	0	0	0	0	0	0	0	LINC01672	1	6724637	6730012	+	2188	lincRNA	long intergenic non-protein coding RNA 1672 [Source:HGNC Symbol;Acc:HGNC:52460]	-
ENSG00000284744	0	0	0	0	0	0	0	0	0	AL591163.1	1	6767954	6770038	+	987	lincRNA	novel transcript	-
ENSG00000237436	4	0	5	3	7	3	4	2	12	CAMTA1-DT	1	6783892	6784843	-	415	antisense	CAMTA1 divergent transcript [Source:HGNC Symbol;Acc:HGNC:53020]	-
ENSG00000171735	283	343	328	339	379	439	353	351	344	CAMTA1	1	6785324	7769706	+	10033	protein_coding	calmodulin binding transcription activator 1 [Source:HGNC Symbol;Acc:HGNC:18806]	CG-1
ENSG00000227950	0	0	0	0	0	0	0	0	0	AL590128.1	1	6834333	6834618	-	286	processed_pseudogene	ribosomal protein L37 (RPL37) pseudogene	-
ENSG00000237365	0	0	0	0	0	0	0	0	0	AL512330.1	1	7008376	7014279	-	349	antisense	novel transcript, antisense to CAMTA1	-
ENSG00000207056	0	0	0	0	0	0	0	0	0	RNU1-8P	1	7219360	7219524	+	165	snRNA	RNA, U1 small nuclear 8, pseudogene [Source:HGNC Symbol;Acc:HGNC:48307]	-
ENSG00000237402	0	0	0	0	0	0	2	0	0	CAMTA1-IT1	1	7368942	7370270	+	365	sense_intronic	CAMTA1 intronic transcript 1 [Source:HGNC Symbol;Acc:HGNC:41446]	-
ENSG00000237728	0	0	0	0	0	0	0	0	0	Z97987.1	1	7382487	7389754	-	744	antisense	novel transcript	-
ENSG00000225126	0	0	0	0	0	0	0	0	0	AL365194.1	1	7441096	7441554	-	361	antisense	novel transcript	-
ENSG00000270171	0	0	0	0	0	0	0	0	0	AL359881.3	1	7693124	7694844	-	1721	lincRNA	novel transcript	-
ENSG00000270035	0	0	0	0	0	0	0	0	0	AL359881.2	1	7698303	7698872	-	570	lincRNA	novel transcript	-
ENSG00000269978	0	0	0	0	0	0	0	0	0	AL359881.1	1	7700704	7700970	-	267	lincRNA	novel transcript	-
ENSG00000049245	3495	3556	3666	4078	4684	5152	3742	4301	3928	VAMP3	1	7771269	7781432	+	2760	protein_coding	vesicle associated membrane protein 3 [Source:HGNC Symbol;Acc:HGNC:12644]	-
ENSG00000269925	4	3	8	15	12	8	15	10	13	Z98884.2	1	7776383	7776775	+	393	sense_intronic	novel transcript, sense intronic to VAMP3	-
ENSG00000049246	61	82	63	57	72	73	67	65	47	PER3	1	7784320	7845177	+	8099	protein_coding	period circadian regulator 3 [Source:HGNC Symbol;Acc:HGNC:8847]	-
ENSG00000236266	0	0	0	0	5	0	0	0	0	Z98884.1	1	7810242	7827342	-	830	antisense	novel transcript	-
ENSG00000049247	0	1	10	5	0	3	4	5	3	UTS2	1	7843083	7853512	-	1791	protein_coding	urotensin 2 [Source:HGNC Symbol;Acc:HGNC:12636]	-
ENSG00000049249	1	1	4	1	3	0	2	1	0	TNFRSF9	1	7915894	7943165	-	6331	protein_coding	TNF receptor superfamily member 9 [Source:HGNC Symbol;Acc:HGNC:11924]	-
ENSG00000270330	0	0	0	0	0	0	0	0	0	AL009183.1	1	7942372	7942726	+	355	processed_pseudogene	small EDRK-rich factor 2 (SERF2) pseudogene	-
ENSG00000116288	2659	2883	2738	3022	3702	3817	3040	3383	3155	PARK7	1	7954291	7985505	+	2397	protein_coding	Parkinsonism associated deglycase [Source:HGNC Symbol;Acc:HGNC:16369]	-
ENSG00000200344	0	0	0	0	0	0	0	1	0	RF00019	1	7982881	7982983	-	103	misc_RNA		-
ENSG00000284747	2	5	1	2	0	4	1	0	4	AL034417.4	1	7991134	8005312	+	4116	antisense	novel transcript, antisense to ERRFI1	-
ENSG00000284716	0	0	0	1	0	0	0	0	0	AL034417.3	1	7998187	7999934	-	1043	lincRNA	novel transcript	-
ENSG00000116285	386	356	416	444	492	597	379	410	342	ERRFI1	1	8004404	8026308	-	4186	protein_coding	ERBB receptor feedback inhibitor 1 [Source:HGNC Symbol;Acc:HGNC:18185]	-
ENSG00000238290	0	0	1	0	0	0	0	0	1	AL034417.2	1	8026738	8122702	+	2044	lincRNA	novel transcript	-
ENSG00000232848	0	0	0	0	0	0	0	0	0	AL034417.1	1	8057245	8058463	-	800	processed_pseudogene	ribosomal protein L7a (RPL7A) pseudogene	-
ENSG00000229305	0	0	0	0	0	0	0	0	0	AL358876.1	1	8189824	8192770	+	1075	processed_pseudogene	52kDa eukaryotic translation initiation factor 2 subunit 3 gamma (EIF2S3) pseudogene	-
ENSG00000227634	1	1	0	1	0	0	0	0	2	LINC01714	1	8202429	8215210	+	950	lincRNA	long intergenic non-protein coding RNA 1714 [Source:HGNC Symbol;Acc:HGNC:52501]	-
ENSG00000200975	0	0	0	0	0	0	0	0	0	RNU1-7P	1	8206434	8206597	-	164	snRNA	RNA, U1 small nuclear 7, pseudogene [Source:HGNC Symbol;Acc:HGNC:48306]	-
ENSG00000233645	0	0	0	0	0	0	0	0	0	AL358876.2	1	8218190	8220529	-	477	lincRNA	novel transcript	-
ENSG00000251977	0	0	0	0	0	0	0	0	0	RNU6-991P	1	8292157	8292263	-	107	snRNA	RNA, U6 small nuclear 991, pseudogene [Source:HGNC Symbol;Acc:HGNC:47954]	-
ENSG00000162426	47	39	24	23	33	31	51	47	42	SLC45A1	1	8317826	8344167	+	2888	protein_coding	solute carrier family 45 member 1 [Source:HGNC Symbol;Acc:HGNC:17939]	-
ENSG00000252254	0	4	0	0	0	0	0	0	0	RF00019	1	8328067	8328179	+	113	misc_RNA		-
ENSG00000142599	2453	2361	2355	1805	2122	2393	2598	2173	2302	RERE	1	8352397	8817643	-	11503	protein_coding	arginine-glutamic acid dipeptide repeats [Source:HGNC Symbol;Acc:HGNC:9965]	zf-GATA
ENSG00000232912	2	1	0	0	1	0	2	1	1	AL096855.1	1	8424645	8434838	+	702	antisense	uncharacterized LOC102724552 [Source:NCBI gene;Acc:102724552]	-
ENSG00000221083	0	0	0	0	0	0	0	0	0	RF00599	1	8511795	8511919	-	125	snoRNA		-
ENSG00000270282	0	0	0	0	0	0	0	0	0	AL096855.2	1	8512653	8513021	+	369	processed_pseudogene	ferritin, light polypeptide (FTL) pseudogene	-
ENSG00000234619	0	0	0	0	0	0	1	0	0	RPL7P11	1	8750430	8751087	+	658	processed_pseudogene	ribosomal protein L7 pseudogene 11 [Source:HGNC Symbol;Acc:HGNC:35667]	-
ENSG00000224315	0	1	0	0	0	0	0	0	0	RPL7P7	1	8786211	8786913	-	703	processed_pseudogene	ribosomal protein L7 pseudogene 7 [Source:HGNC Symbol;Acc:HGNC:36895]	-
ENSG00000222511	0	0	0	0	0	0	0	0	0	RF00019	1	8796571	8796673	-	103	misc_RNA		-
ENSG00000226545	1	0	0	0	0	0	0	0	0	AL357552.1	1	8798475	8799506	+	415	unprocessed_pseudogene	ribosomal protein L27 (RPL27) pseudogene	-
ENSG00000228423	1	0	0	0	0	0	0	0	0	AL357552.2	1	8805860	8807051	-	353	lincRNA	novel transcript	-
ENSG00000229716	0	0	0	0	0	0	0	0	0	RPL23AP19	1	8831007	8831375	+	369	processed_pseudogene	ribosomal protein L23a pseudogene 19 [Source:HGNC Symbol;Acc:HGNC:36708]	-
ENSG00000074800	37326	37352	36269	35743	43419	43644	39522	40427	39582	ENO1	1	8861000	8879250	-	5276	protein_coding	enolase 1 [Source:HGNC Symbol;Acc:HGNC:3350]	-
ENSG00000274258	1	0	0	0	0	0	0	0	0	MIR6728	1	8866502	8866590	-	89	miRNA	microRNA 6728 [Source:HGNC Symbol;Acc:HGNC:49961]	-
ENSG00000230679	0	3	1	0	2	0	2	0	0	ENO1-AS1	1	8878835	8879894	+	456	antisense	ENO1 antisense RNA 1 [Source:HGNC Symbol;Acc:HGNC:40214]	-
ENSG00000201725	0	0	0	0	0	0	0	0	0	RNU6-304P	1	8883427	8883533	-	107	snRNA	RNA, U6 small nuclear 304, pseudogene [Source:HGNC Symbol;Acc:HGNC:47267]	-
ENSG00000238249	0	0	0	0	0	0	0	0	0	HMGN2P17	1	8893409	8894151	+	743	processed_pseudogene	high mobility group nucleosomal binding domain 2 pseudogene 17 [Source:HGNC Symbol;Acc:HGNC:39381]	-
ENSG00000232208	0	0	0	0	1	0	0	1	0	AL139415.1	1	8907393	8907744	-	352	processed_pseudogene	zinc finger protein 271 (ZNF) pseudogene	-
ENSG00000232663	0	0	0	0	0	0	0	0	0	AL139415.2	1	8909742	8909904	+	163	processed_pseudogene	pseudogene similar to part of cytochrome oxidase subunit II	-
ENSG00000131686	0	0	0	0	0	0	0	0	0	CA6	1	8945867	8975092	+	2662	protein_coding	carbonic anhydrase 6 [Source:HGNC Symbol;Acc:HGNC:1380]	-
ENSG00000265141	0	0	0	0	0	0	0	0	0	RN7SL451P	1	8979576	8979874	-	299	misc_RNA	RNA, 7SL, cytoplasmic 451, pseudogene [Source:HGNC Symbol;Acc:HGNC:46467]	-
ENSG00000197241	0	0	0	0	0	0	1	0	0	SLC2A7	1	9003300	9026345	-	1539	protein_coding	solute carrier family 2 member 7 [Source:HGNC Symbol;Acc:HGNC:13445]	-
ENSG00000142583	33	35	8	6	5	3	33	26	33	SLC2A5	1	9035107	9088478	-	6693	protein_coding	solute carrier family 2 member 5 [Source:HGNC Symbol;Acc:HGNC:11010]	-
ENSG00000252404	0	0	0	0	0	0	0	0	0	RF00424	1	9082696	9082879	+	184	scaRNA		-
ENSG00000180758	181	164	219	162	201	211	158	182	183	GPR157	1	9100305	9129170	-	5372	protein_coding	G protein-coupled receptor 157 [Source:HGNC Symbol;Acc:HGNC:23687]	-
ENSG00000228526	227	249	209	116	173	183	225	214	244	MIR34AHG	1	9148011	9198906	-	8702	lincRNA	MIR34A host gene [Source:HGNC Symbol;Acc:HGNC:51913]	-
ENSG00000284357	0	0	0	0	0	0	0	0	0	MIR34A	1	9151668	9151777	-	110	miRNA	microRNA 34a [Source:HGNC Symbol;Acc:HGNC:31635]	-
ENSG00000234546	67	94	60	29	49	43	52	58	58	LNCTAM34A	1	9182004	9196284	+	1662	lincRNA	long non coding transcriptional activator of miR34a [Source:HGNC Symbol;Acc:HGNC:52548]	-
ENSG00000049239	2795	2810	2835	2321	2635	2802	3022	2581	2663	H6PD	1	9234775	9271337	+	9321	protein_coding	hexose-6-phosphate dehydrogenase/glucose 1-dehydrogenase [Source:HGNC Symbol;Acc:HGNC:4795]	-
ENSG00000171621	636	688	557	394	422	470	790	616	811	SPSB1	1	9292880	9369532	+	3403	protein_coding	splA/ryanodine receptor domain and SOCS box containing 1 [Source:HGNC Symbol;Acc:HGNC:30628]	-
ENSG00000284652	1	4	1	4	0	0	2	4	3	BX323043.1	1	9421098	9422862	-	1765	lincRNA	novel transcript	-
ENSG00000284693	36	31	20	15	16	27	29	19	28	AL928921.2	1	9425094	9440564	-	2623	lincRNA	uncharacterized LOC100506022 [Source:NCBI gene;Acc:100506022]	-
ENSG00000252956	0	0	0	0	0	0	0	0	0	RNA5SP40	1	9437669	9437778	-	110	rRNA_pseudogene	RNA, 5S ribosomal pseudogene 40 [Source:HGNC Symbol;Acc:HGNC:42816]	-
ENSG00000235263	0	0	0	0	0	0	0	0	0	AL928921.1	1	9501092	9503471	-	708	lincRNA	novel transcript	-
ENSG00000171612	265	276	227	248	305	348	264	258	263	SLC25A33	1	9539482	9585179	+	3854	protein_coding	solute carrier family 25 member 33 [Source:HGNC Symbol;Acc:HGNC:29681]	-
ENSG00000231181	1	1	0	0	1	0	0	1	1	AL954705.1	1	9576427	9576985	+	559	processed_pseudogene	ribosomal protein L9 (RPL9) pseudogene	-
ENSG00000188807	320	286	327	391	457	510	285	329	312	TMEM201	1	9588922	9614873	+	6966	protein_coding	transmembrane protein 201 [Source:HGNC Symbol;Acc:HGNC:33719]	-
ENSG00000171608	505	496	458	421	417	473	514	475	466	PIK3CD	1	9651732	9729114	+	6332	protein_coding	phosphatidylinositol-4,5-bisphosphate 3-kinase catalytic subunit delta [Source:HGNC Symbol;Acc:HGNC:8977]	-
ENSG00000179840	0	0	0	0	0	0	0	0	0	PIK3CD-AS1	1	9652610	9654586	-	1823	antisense	PIK3CD antisense RNA 1 [Source:HGNC Symbol;Acc:HGNC:32346]	-
ENSG00000233268	0	0	0	0	0	0	0	0	0	AL691449.1	1	9660828	9662626	-	421	processed_pseudogene	ribosomal protein L26 pseudogene (RPL26)	-
ENSG00000231789	24	8	24	8	12	18	31	23	21	PIK3CD-AS2	1	9672426	9687555	-	939	antisense	PIK3CD antisense RNA 2 [Source:HGNC Symbol;Acc:HGNC:51334]	-
ENSG00000171603	6013	6187	5217	4749	5769	5880	6629	5480	5886	CLSTN1	1	9729026	9824526	-	5683	protein_coding	calsyntenin 1 [Source:HGNC Symbol;Acc:HGNC:17447]	-
ENSG00000271264	0	0	0	0	0	0	0	0	0	MZT1P1	1	9780822	9781240	+	246	processed_pseudogene	mitotic spindle organizing protein 1 pseudogene 1 [Source:HGNC Symbol;Acc:HGNC:50605]	-
ENSG00000280113	0	0	0	0	0	0	0	0	0	AL357140.3	1	9826289	9828271	-	1983	TEC	TEC	-
ENSG00000178585	319	363	312	344	346	392	377	338	308	CTNNBIP1	1	9848276	9910336	-	3339	protein_coding	catenin beta interacting protein 1 [Source:HGNC Symbol;Acc:HGNC:16913]	-
ENSG00000223989	0	0	0	0	0	0	0	0	0	AL357140.1	1	9848318	9850154	+	424	antisense	novel transcript	-
ENSG00000285701	1	0	0	0	0	0	1	0	0	AL357140.5	1	9900614	9908034	+	762	antisense	novel transcript, antisense to CTNNBIP1	-
ENSG00000162441	322	339	340	390	467	436	354	356	337	LZIC	1	9922113	9943407	-	2794	protein_coding	leucine zipper and CTNNBIP1 domain containing [Source:HGNC Symbol;Acc:HGNC:17497]	-
ENSG00000228150	2	6	4	7	7	10	10	9	6	AL357140.2	1	9942923	9949974	+	440	sense_intronic	novel transcript	-
ENSG00000173614	199	255	225	238	288	294	243	287	231	NMNAT1	1	9943428	9985501	+	4610	protein_coding	nicotinamide nucleotide adenylyltransferase 1 [Source:HGNC Symbol;Acc:HGNC:17877]	-
ENSG00000202415	2	0	1	0	0	3	4	3	1	RN7SKP269	1	9947318	9947636	+	319	misc_RNA	RNA, 7SK small nuclear pseudogene 269 [Source:HGNC Symbol;Acc:HGNC:45993]	-
ENSG00000283611	2	0	1	0	1	0	0	0	0	AL357140.4	1	9950572	9960787	-	444	unitary_pseudogene	novel pseudogene	-
ENSG00000265521	0	0	0	0	0	0	0	0	0	MIR5697	1	9967381	9967458	+	78	miRNA	microRNA 5697 [Source:HGNC Symbol;Acc:HGNC:43509]	-
ENSG00000241326	0	0	0	0	0	0	0	0	0	AL603962.1	1	9983141	9984568	+	436	sense_intronic	novel transcript	-
ENSG00000162444	1	3	2	2	5	9	0	3	7	RBP7	1	9997206	10016020	+	861	protein_coding	retinol binding protein 7 [Source:HGNC Symbol;Acc:HGNC:30316]	-
ENSG00000130939	1498	1397	1429	1363	1647	1616	1513	1388	1542	UBE4B	1	10032832	10181239	+	9128	protein_coding	ubiquitination factor E4B [Source:HGNC Symbol;Acc:HGNC:12500]	-
ENSG00000224340	0	0	0	0	0	0	0	0	0	AL590639.1	1	10054445	10054781	-	337	processed_pseudogene	pseudogene similar to part of ribosomal protein L21 (RPL21)	-
ENSG00000233623	0	0	0	0	0	0	0	0	0	PGAM1P11	1	10058671	10059648	+	680	processed_pseudogene	phosphoglycerate mutase 1 pseudogene 11 [Source:HGNC Symbol;Acc:HGNC:42464]	-
ENSG00000201746	0	0	1	0	1	0	0	0	0	RNU6-828P	1	10163268	10163374	+	107	snRNA	RNA, U6 small nuclear 828, pseudogene [Source:HGNC Symbol;Acc:HGNC:47791]	-
ENSG00000054523	1395	1239	1451	1487	1855	1931	1380	1249	1289	KIF1B	1	10210805	10381603	+	17720	protein_coding	kinesin family member 1B [Source:HGNC Symbol;Acc:HGNC:16636]	-
ENSG00000264881	0	0	0	0	0	0	0	0	0	MIR1273D	1	10227718	10227803	+	86	miRNA	microRNA 1273d [Source:HGNC Symbol;Acc:HGNC:38375]	-
ENSG00000199562	0	0	0	0	0	0	0	0	0	RNU6-37P	1	10298966	10299072	+	107	snRNA	RNA, U6 small nuclear 37, pseudogene [Source:HGNC Symbol;Acc:HGNC:34281]	-
ENSG00000264501	0	0	0	0	0	0	0	0	0	RN7SL731P	1	10306465	10306757	+	293	misc_RNA	RNA, 7SL, cytoplasmic 731, pseudogene [Source:HGNC Symbol;Acc:HGNC:46747]	-
ENSG00000284735	0	0	1	1	0	0	5	1	3	AL139424.3	1	10381906	10387150	-	2381	lincRNA	novel transcript	-
ENSG00000284642	2	1	4	1	2	0	2	0	1	AL139424.2	1	10395416	10397432	+	1477	lincRNA	novel transcript	-
ENSG00000142657	3234	3317	3453	3091	3631	3618	3675	3493	3714	PGD	1	10398592	10420144	+	2966	protein_coding	phosphogluconate dehydrogenase [Source:HGNC Symbol;Acc:HGNC:8891]	-
ENSG00000271989	0	2	1	0	0	0	0	0	0	AL139424.1	1	10429881	10430677	-	797	antisense	novel transcript, antisense to APITD1-CORT	-
ENSG00000251503	0	0	0	0	2	0	2	0	2	CENPS-CORT	1	10430102	10452153	+	2244	protein_coding	CENPS-CORT readthrough [Source:HGNC Symbol;Acc:HGNC:38843]	-
ENSG00000175279	12	20	16	30	19	31	18	21	15	CENPS	1	10430443	10442809	+	1739	protein_coding	centromere protein S [Source:HGNC Symbol;Acc:HGNC:23163]	-
ENSG00000241563	2	0	3	4	2	3	3	0	0	CORT	1	10449719	10451902	+	1130	protein_coding	cortistatin [Source:HGNC Symbol;Acc:HGNC:2257]	-
ENSG00000160049	1032	986	1017	1200	1446	1505	1085	1191	1150	DFFA	1	10456522	10472526	-	6622	protein_coding	DNA fragmentation factor subunit alpha [Source:HGNC Symbol;Acc:HGNC:2772]	-
ENSG00000203469	0	0	0	0	0	0	0	0	0	AL354956.1	1	10458555	10459338	+	467	antisense	novel transcript, antisense to DFFA	-
ENSG00000142655	506	505	433	478	607	588	475	530	475	PEX14	1	10472288	10630758	+	2995	protein_coding	peroxisomal biogenesis factor 14 [Source:HGNC Symbol;Acc:HGNC:8856]	-
ENSG00000243267	3	0	0	0	0	0	0	2	0	RN7SL614P	1	10616836	10617115	+	280	misc_RNA	RNA, 7SL, cytoplasmic 614, pseudogene [Source:HGNC Symbol;Acc:HGNC:46630]	-
ENSG00000130940	2	2	0	6	2	6	4	7	1	CASZ1	1	10636604	10796650	-	11336	protein_coding	castor zinc finger 1 [Source:HGNC Symbol;Acc:HGNC:26002]	Others
ENSG00000272078	0	2	1	1	5	1	1	0	1	AL139423.1	1	10639241	10654333	+	7923	antisense	novel transcript, antisense to CASZ1	-
ENSG00000225158	0	0	0	0	0	0	0	0	0	HSPE1P24	1	10895761	10895998	+	238	processed_pseudogene	heat shock protein family E (Hsp10) member 1 pseudogene 24 [Source:HGNC Symbol;Acc:HGNC:49343]	-
ENSG00000175262	0	0	0	0	0	0	0	0	0	C1orf127	1	10946471	10982037	-	3573	protein_coding	chromosome 1 open reading frame 127 [Source:HGNC Symbol;Acc:HGNC:26730]	-
ENSG00000215785	0	1	0	0	0	0	1	3	0	CFL1P6	1	10990978	10991797	-	494	processed_pseudogene	cofilin 1 pseudogene 6 [Source:HGNC Symbol;Acc:HGNC:34545]	-
ENSG00000120948	1060	1256	1133	1267	1543	1592	1088	1219	1132	TARDBP	1	11012344	11026420	+	6071	protein_coding	TAR DNA binding protein [Source:HGNC Symbol;Acc:HGNC:11571]	-
ENSG00000277726	0	0	0	0	0	0	0	0	0	AL109811.4	1	11012662	11030528	+	2205	protein_coding	novel protein	-
ENSG00000009724	17	11	7	14	11	12	9	11	13	MASP2	1	11026523	11047233	-	4251	protein_coding	mannan binding lectin serine peptidase 2 [Source:HGNC Symbol;Acc:HGNC:6902]	-
ENSG00000271895	9	3	13	6	5	10	11	9	7	AL109811.3	1	11029659	11030528	+	870	antisense	novel transcript, antisense to MASP2	-
ENSG00000116649	2631	2586	3012	3676	4279	4549	2631	2963	2779	SRM	1	11054584	11060024	-	1898	protein_coding	spermidine synthase [Source:HGNC Symbol;Acc:HGNC:11296]	-
ENSG00000171824	602	593	582	747	956	1013	634	605	636	EXOSC10	1	11066618	11099881	-	6003	protein_coding	exosome component 10 [Source:HGNC Symbol;Acc:HGNC:9138]	-
ENSG00000226849	2	0	0	0	0	1	2	0	0	AL109811.1	1	11068471	11073097	+	2682	antisense	novel transcript	-
ENSG00000230337	10	9	4	5	7	7	9	10	5	AL109811.2	1	11099675	11102100	+	536	antisense	uncharacterized LOC105376736 [Source:NCBI gene;Acc:105376736]	-
ENSG00000198793	1486	1482	1554	1363	1798	1806	1691	1527	1596	MTOR	1	11106535	11262507	-	12119	protein_coding	mechanistic target of rapamycin kinase [Source:HGNC Symbol;Acc:HGNC:3942]	-
ENSG00000225602	1	0	1	0	0	0	0	1	0	MTOR-AS1	1	11143898	11149537	+	763	antisense	MTOR antisense RNA 1 [Source:HGNC Symbol;Acc:HGNC:40242]	-
ENSG00000253086	0	0	0	0	0	0	0	0	0	RNU6-537P	1	11152350	11152452	+	103	snRNA	RNA, U6 small nuclear 537, pseudogene [Source:HGNC Symbol;Acc:HGNC:47500]	-
ENSG00000171819	0	0	0	1	2	1	0	3	2	ANGPTL7	1	11189341	11195981	+	2238	protein_coding	angiopoietin like 7 [Source:HGNC Symbol;Acc:HGNC:24078]	-
ENSG00000207451	0	0	0	0	0	0	0	0	0	RNU6-291P	1	11226254	11226360	+	107	snRNA	RNA, U6 small nuclear 291, pseudogene [Source:HGNC Symbol;Acc:HGNC:47254]	-
ENSG00000238173	0	0	0	0	0	0	0	0	0	RPL39P6	1	11232963	11233112	+	150	processed_pseudogene	ribosomal protein L39 pseudogene 6 [Source:HGNC Symbol;Acc:HGNC:35803]	-
ENSG00000120942	307	329	349	390	497	446	331	329	368	UBIAD1	1	11273206	11296049	+	5082	protein_coding	UbiA prenyltransferase domain containing 1 [Source:HGNC Symbol;Acc:HGNC:30791]	-
ENSG00000238199	0	2	0	1	0	1	4	0	0	UBE2V2P3	1	11278616	11279351	-	437	processed_pseudogene	ubiquitin conjugating enzyme E2 V2 pseudogene 3 [Source:HGNC Symbol;Acc:HGNC:44891]	-
ENSG00000284646	0	0	0	0	0	0	0	0	0	AL031291.1	1	11311734	11319093	-	742	lincRNA	novel transcript	-
ENSG00000224338	0	0	0	0	0	0	0	0	0	MTCYBP45	1	11425257	11425821	-	565	processed_pseudogene	MT-CYB pseudogene 45 [Source:HGNC Symbol;Acc:HGNC:52313]	-
ENSG00000204624	1	1	6	0	0	0	0	0	0	DISP3	1	11479166	11537584	+	6142	protein_coding	dispatched RND transporter family member 3 [Source:HGNC Symbol;Acc:HGNC:29251]	-
ENSG00000285833	0	0	0	0	0	0	0	0	0	AL590989.1	1	11500803	11502016	-	1051	antisense	novel transcript, antisense to DISP3	-
ENSG00000235643	0	0	0	0	0	0	0	0	0	LINC01647	1	11609531	11613355	+	1285	lincRNA	long intergenic non-protein coding RNA 1647 [Source:HGNC Symbol;Acc:HGNC:52434]	-
ENSG00000284708	3	0	0	0	0	0	0	0	2	AL031731.1	1	11623558	11643416	+	2094	antisense	novel transcript	-
ENSG00000116661	289	356	266	136	126	128	386	349	327	FBXO2	1	11637018	11655785	-	3416	protein_coding	F-box protein 2 [Source:HGNC Symbol;Acc:HGNC:13581]	-
ENSG00000132879	354	363	293	307	349	379	349	407	336	FBXO44	1	11654375	11663327	+	3527	protein_coding	F-box protein 44 [Source:HGNC Symbol;Acc:HGNC:24847]	-
ENSG00000116663	258	236	274	215	242	263	237	262	239	FBXO6	1	11664124	11674354	+	1811	protein_coding	F-box protein 6 [Source:HGNC Symbol;Acc:HGNC:13585]	-
ENSG00000116670	293	325	268	372	457	404	301	388	318	MAD2L2	1	11674480	11691650	-	3324	protein_coding	mitotic arrest deficient 2 like 2 [Source:HGNC Symbol;Acc:HGNC:6764]	-
ENSG00000162490	0	0	2	0	0	1	0	0	0	DRAXIN	1	11691729	11725857	+	7346	protein_coding	dorsal inhibitory axon guidance protein [Source:HGNC Symbol;Acc:HGNC:25054]	-
ENSG00000177674	676	831	664	677	740	739	789	764	750	AGTRAP	1	11736084	11754802	+	2435	protein_coding	angiotensin II receptor associated protein [Source:HGNC Symbol;Acc:HGNC:13539]	-
ENSG00000215910	0	0	0	0	0	0	0	0	0	C1orf167	1	11761787	11789585	+	6499	protein_coding	chromosome 1 open reading frame 167 [Source:HGNC Symbol;Acc:HGNC:25262]	-
ENSG00000177553	0	0	0	0	0	0	0	0	0	AL953897.1	1	11777077	11779619	-	1868	antisense	uncharacterized LOC102724659 [Source:NCBI gene;Acc:102724659]	-
ENSG00000177000	556	581	601	467	520	577	614	658	613	MTHFR	1	11785723	11806920	-	11978	protein_coding	methylenetetrahydrofolate reductase [Source:HGNC Symbol;Acc:HGNC:7436]	-
ENSG00000011021	457	411	404	322	473	400	458	322	392	CLCN6	1	11806096	11848079	+	8174	protein_coding	chloride voltage-gated channel 6 [Source:HGNC Symbol;Acc:HGNC:2024]	-
ENSG00000276470	0	0	0	0	0	0	0	0	0	RF02156	1	11843812	11843984	+	173	misc_RNA		-
ENSG00000278852	0	0	0	0	0	0	0	0	0	RF02157	1	11845549	11845697	+	149	misc_RNA		-
ENSG00000175206	2	1	3	0	0	0	0	3	2	NPPA	1	11845709	11848345	-	1120	protein_coding	natriuretic peptide A [Source:HGNC Symbol;Acc:HGNC:7939]	-
ENSG00000275915	0	0	0	0	0	0	0	0	0	RF02158	1	11847442	11847549	+	108	misc_RNA		-
ENSG00000120937	19	15	22	7	15	15	29	25	27	NPPB	1	11857464	11858931	-	694	protein_coding	natriuretic peptide B [Source:HGNC Symbol;Acc:HGNC:7940]	-
ENSG00000224904	0	0	0	0	0	0	0	0	0	AL021155.1	1	11877770	11880406	+	2637	processed_pseudogene	pseudogene similar to part of SET binding factor 1 (SBF1)	-
ENSG00000285646	1	2	1	4	0	1	2	1	4	AL021155.2	1	11908147	11913232	+	737	lincRNA	novel transcript	-
ENSG00000199347	0	0	0	0	0	0	0	0	0	RNU5E-1	1	11908152	11908271	+	120	snRNA	RNA, U5E small nuclear 1 [Source:HGNC Symbol;Acc:HGNC:10215]	-
ENSG00000201801	0	0	0	0	0	0	0	0	0	RNU5E-4P	1	11909808	11909927	-	120	snRNA	RNA, U5E small nuclear 4, pseudogene [Source:HGNC Symbol;Acc:HGNC:42513]	-
ENSG00000116685	1712	1981	1816	1692	2135	2068	1909	2059	2029	KIAA2013	1	11919591	11926428	-	3281	protein_coding	KIAA2013 [Source:HGNC Symbol;Acc:HGNC:28513]	-
ENSG00000083444	13415	15402	13071	9865	11589	12251	17222	14794	15570	PLOD1	1	11934205	11975538	+	5320	protein_coding	procollagen-lysine,2-oxoglutarate 5-dioxygenase 1 [Source:HGNC Symbol;Acc:HGNC:9081]	-
ENSG00000116688	2650	2555	2698	2839	3502	3550	2668	2575	2725	MFN2	1	11980181	12013514	+	4973	protein_coding	mitofusin 2 [Source:HGNC Symbol;Acc:HGNC:16877]	-
ENSG00000270914	0	0	0	0	0	0	0	0	0	AL096840.1	1	12017216	12017308	-	93	processed_pseudogene	inositol(myo)-1(or 4)-monophosphatase 1 (IMPA1) pseudogene	-
ENSG00000116691	193	226	213	241	276	308	218	242	255	MIIP	1	12019466	12032045	+	2821	protein_coding	migration and invasion inhibitory protein [Source:HGNC Symbol;Acc:HGNC:25715]	-
ENSG00000202461	2	0	0	1	1	1	2	1	1	RF00019	1	12024012	12024124	-	113	misc_RNA		-
ENSG00000276869	0	0	0	0	0	0	0	0	0	MIR6729	1	12029158	12029222	+	65	miRNA	microRNA 6729 [Source:HGNC Symbol;Acc:HGNC:50103]	-
ENSG00000243539	0	0	0	0	0	0	0	0	0	RN7SL649P	1	12036740	12037014	-	275	misc_RNA	RNA, 7SL, cytoplasmic 649, pseudogene [Source:HGNC Symbol;Acc:HGNC:46665]	-
ENSG00000120949	2	6	12	7	5	9	5	6	7	TNFRSF8	1	12063377	12144207	+	3738	protein_coding	TNF receptor superfamily member 8 [Source:HGNC Symbol;Acc:HGNC:11923]	-
ENSG00000201135	0	0	0	0	0	0	0	0	0	RNU6-777P	1	12077881	12077984	-	104	snRNA	RNA, U6 small nuclear 777, pseudogene [Source:HGNC Symbol;Acc:HGNC:47740]	-
ENSG00000227875	0	0	0	0	0	0	0	0	0	RPL23AP89	1	12080293	12080547	-	255	processed_pseudogene	ribosomal protein L23a pseudogene 89 [Source:HGNC Symbol;Acc:HGNC:51623]	-
ENSG00000285604	0	0	0	0	0	0	0	0	0	AL357835.1	1	12088441	12092264	-	1196	antisense	novel transcript, antisense to TNFRSF8	-
ENSG00000283789	0	0	0	0	0	0	0	0	0	MIR7846	1	12166943	12167038	+	96	miRNA	microRNA 7846 [Source:HGNC Symbol;Acc:HGNC:50029]	-
ENSG00000028137	6	9	9	14	13	24	7	6	9	TNFRSF1B	1	12167003	12209228	+	3766	protein_coding	TNF receptor superfamily member 1B [Source:HGNC Symbol;Acc:HGNC:11917]	-
ENSG00000263676	0	0	0	0	0	0	0	0	0	MIR4632	1	12191713	12191773	+	61	miRNA	microRNA 4632 [Source:HGNC Symbol;Acc:HGNC:41593]	-
ENSG00000225196	0	0	0	0	0	0	0	0	0	RPL10P17	1	12220794	12221109	-	316	processed_pseudogene	ribosomal protein L10 pseudogene 17 [Source:HGNC Symbol;Acc:HGNC:52348]	-
ENSG00000252969	0	0	0	0	0	0	0	0	0	RF00156	1	12221148	12221271	-	124	snoRNA		-
ENSG00000048707	968	815	939	645	803	890	905	704	814	VPS13D	1	12230030	12512047	+	20768	protein_coding	vacuolar protein sorting 13 homolog D [Source:HGNC Symbol;Acc:HGNC:23595]	-
ENSG00000239149	0	1	1	1	0	0	0	0	2	SNORA59A	1	12507246	12507397	+	152	snoRNA	small nucleolar RNA, H/ACA box 59A [Source:HGNC Symbol;Acc:HGNC:32653]	-
ENSG00000229484	1	0	0	0	0	0	0	0	0	AC243836.1	1	12527724	12528420	+	438	lincRNA	novel transcript	-
ENSG00000162496	2134	2147	1707	549	662	696	2280	2194	2415	DHRS3	1	12567910	12617731	-	3036	protein_coding	dehydrogenase/reductase 3 [Source:HGNC Symbol;Acc:HGNC:17693]	-
ENSG00000221340	8	5	1	2	1	1	9	6	5	RNU6ATAC18P	1	12569972	12570072	-	101	snRNA	RNA, U6atac small nuclear 18, pseudogene [Source:HGNC Symbol;Acc:HGNC:46917]	-
ENSG00000276830	0	4	0	0	0	0	0	1	1	MIR6730	1	12578957	12579023	-	67	miRNA	microRNA 6730 [Source:HGNC Symbol;Acc:HGNC:50222]	-
ENSG00000272482	16	25	15	3	6	7	22	13	18	AC254633.1	1	12618900	12619244	-	345	lincRNA	novel transcript	-
ENSG00000204518	1	0	0	0	0	0	0	1	0	AADACL4	1	12644547	12667086	+	1575	protein_coding	arylacetamide deacetylase like 4 [Source:HGNC Symbol;Acc:HGNC:32038]	-
ENSG00000226166	0	0	0	0	0	0	0	0	0	AC244670.1	1	12692909	12693020	+	112	processed_pseudogene	ribosomal protein L23a (RPL23A) pseudogene	-
ENSG00000188984	0	0	0	0	0	0	0	0	0	AADACL3	1	12716115	12728759	+	4049	protein_coding	arylacetamide deacetylase like 3 [Source:HGNC Symbol;Acc:HGNC:32037]	-
ENSG00000157330	0	0	0	0	0	0	0	0	0	C1orf158	1	12746215	12763699	+	4118	protein_coding	chromosome 1 open reading frame 158 [Source:HGNC Symbol;Acc:HGNC:28567]	-
ENSG00000116726	0	0	0	0	0	0	0	0	0	PRAMEF12	1	12774841	12777906	+	1786	protein_coding	PRAME family member 12 [Source:HGNC Symbol;Acc:HGNC:22125]	-
ENSG00000116721	0	0	0	0	0	0	0	0	0	PRAMEF1	1	12791397	12796628	+	2439	protein_coding	PRAME family member 1 [Source:HGNC Symbol;Acc:HGNC:28840]	-
ENSG00000228338	0	0	0	0	0	0	0	0	0	LINC01784	1	12822686	12823159	-	378	lincRNA	long intergenic non-protein coding RNA 1784 [Source:HGNC Symbol;Acc:HGNC:52574]	-
ENSG00000239810	0	0	0	0	0	0	0	0	0	PRAMEF11	1	12824605	12831410	-	1845	protein_coding	PRAME family member 11 [Source:HGNC Symbol;Acc:HGNC:14086]	-
ENSG00000231103	0	0	0	0	0	0	0	0	0	PRAMEF30P	1	12838125	12841357	-	1417	unprocessed_pseudogene	PRAME family member 30, pseudogene [Source:HGNC Symbol;Acc:HGNC:51892]	-
ENSG00000179172	0	0	0	0	0	0	0	0	0	HNRNPCL1	1	12847408	12848725	-	1108	protein_coding	heterogeneous nuclear ribonucleoprotein C-like 1 [Source:HGNC Symbol;Acc:HGNC:29295]	-
ENSG00000120952	0	0	0	0	0	0	0	0	0	PRAMEF2	1	12857086	12861909	+	1642	protein_coding	PRAME family member 2 [Source:HGNC Symbol;Acc:HGNC:28841]	-
ENSG00000243073	0	0	0	0	0	0	0	0	0	PRAMEF4	1	12879224	12886201	-	1828	protein_coding	PRAME family member 4 [Source:HGNC Symbol;Acc:HGNC:31971]	-
ENSG00000187545	0	0	0	0	0	0	0	0	0	PRAMEF10	1	12892896	12898270	-	1525	protein_coding	PRAME family member 10 [Source:HGNC Symbol;Acc:HGNC:27997]	-
ENSG00000204510	0	0	0	0	0	0	0	0	0	PRAMEF7	1	12916610	12920482	+	1660	protein_coding	PRAME family member 7 [Source:HGNC Symbol;Acc:HGNC:28415]	-
ENSG00000207434	0	0	0	0	0	0	0	0	0	RNU6-1072P	1	12922554	12922660	+	107	snRNA	RNA, U6 small nuclear 1072, pseudogene [Source:HGNC Symbol;Acc:HGNC:48035]	-
ENSG00000234064	0	0	0	0	0	0	0	0	0	PRAMEF29P	1	12926162	12928253	+	1139	unprocessed_pseudogene	PRAME family member 29, pseudogene [Source:HGNC Symbol;Acc:HGNC:51891]	-
ENSG00000232423	0	0	0	0	0	0	0	0	0	PRAMEF6	1	12938472	12947580	-	1784	protein_coding	PRAME family member 6 [Source:HGNC Symbol;Acc:HGNC:30583]	-
ENSG00000274178	0	0	0	0	0	0	0	0	0	PRAMEF28P	1	13029339	13032130	+	1450	unprocessed_pseudogene	PRAME family member 28, pseudogene [Source:HGNC Symbol;Acc:HGNC:51890]	-
[truncated: 58,288 more rows]
