# Supplementary material for: Decreased mitochondrial NAD+ in WRN deficient cells links to dysfunctional proliferation
Source: Aging (Albany NY). 2025 Apr 2;17(4):937–59. doi: 10.18632/aging.206236 (PMC12074813; doi:10.18632/aging.206236)
Supplement: Supplementary File 2 [file aging-17-206236-s004.xlsx]

## Sheet: NMNAT1
Supplementary File 2. Results from ChIP sequencing datasets from the ENCODE Transcription factor target database for potential co-regulation by comparing transcription factors known to bind to specific gene promoters, as we described previously [6]. Our analysis showed that WRN has 110 targets, NMNAT1 has 140 targets, NMNAT2 has 53 targets, and NMNAT3 has 74 targets.
140 associations	ARID3A		https://maayanlab.cloud/Harmonizome/gene/NMNAT1
	ATF1
	ATF2
	ATF3
	BACH1
	BATF
	BCL11A
	BCL3
	BCLAF1
	BHLHE40
	BRCA1
	CBX3
	CCNT2
	CEBPB
	CEBPD
	CHD1
	CHD2
	CHD4
	CHD7
	CREB1
	CTBP2
	CTCF
	CUX1
	E2F4
	E2F6
	EBF1
	EGR1
	ELF1
	ELK1
	ELK4
	EP300
	ETS1
	EZH2
	FLI1
	FOS
	FOSL2
	FOXM1
	FOXP2
	GABPA
	GATA3
	GTF2B
	GTF2F1
	GTF3C2
	H2AFZ
	HCFC1
	HDAC1
	HDAC2
	HDAC6
	HMGN3
	HNF4A
	HNF4G
	IRF1
	IRF3
	IRF4
	JUN
	JUND
	KAT2A
	KAT2B
	KDM1A
	KDM4A
	KDM5A
	KDM5B
	MAFF
	MAFK
	MAX
	MAZ
	MBD4
	MTA3
	MXI1
	MYBL2
	MYC
	MYOG
	NANOG
	NELFE
	NFATC1
	NFIC
	NFYA
	NFYB
	NR2F2
	NR3C1
	NRF1
	PAX5
	PBX3
	PHF8
	PML
	POLR2A
	POU2F2
	RAD21
	RBBP5
	RCOR1
	RELA
	REST
	RFX5
	RUNX3
	SAP30
	SETDB1
	SIN3A
	SIRT6
	SIX5
	SMARCB1
	SMC3
	SP1
	SP2
	SP4
	SPI1
	SRF
	STAT1
	STAT3
	STAT5A
	SUPT20H
	SUZ12
	TAF1
	TAF7
	TAL1
	TBL1XR1
	TBP
	TCF12
	TCF3
	TCF7L2
	TEAD4
	TFAP2A
	TFAP2C
	THAP1
	TRIM28
	UBTF
	USF1
	USF2
	WHSC1
	WRNIP1
	YY1
	ZBTB33
	ZBTB7A
	ZC3H11A
	ZEB1
	ZKSCAN1
	ZMIZ1
	ZNF143
	ZNF217
	ZNF263
	ZNF384

## Sheet: WRN
110 associations	ARID3A		https://maayanlab.cloud/Harmonizome/gene/WRN
	ATF1
	ATF3
	BACH1
	BCL3
	BCLAF1
	BHLHE40
	BRCA1
	CBX3
	CCNT2
	CEBPB
	CEBPD
	CHD1
	CHD2
	CHD7
	CREB1
	CTBP2
	CTCF
	CUX1
	E2F4
	E2F6
	EGR1
	ELF1
	ELK1
	EP300
	ETS1
	EZH2
	FOS
	FOXA1
	FOXA2
	FOXP2
	GABPA
	GATA1
	GATA2
	GTF2B
	GTF2F1
	H2AFZ
	HCFC1
	HDAC1
	HDAC2
	HDAC6
	HMGN3
	IRF1
	IRF3
	JUN
	JUND
	KAT2A
	KDM4A
	KDM5A
	KDM5B
	MAFF
	MAFK
	MAX
	MAZ
	MTA3
	MXI1
	MYB
	MYBL2
	MYC
	MYOG
	NELFE
	NFIC
	NFYA
	NFYB
	NR2F2
	NRF1
	PAX5
	PHF8
	PML
	POLR2A
	POU2F2
	RAD21
	RBBP5
	RCOR1
	REST
	RFX5
	RUNX3
	SAP30
	SETDB1
	SIN3A
	SIRT6
	SIX5
	SMC3
	SP1
	SP4
	SRF
	STAT1
	STAT3
	STAT5A
	TAF1
	TAL1
	TBL1XR1
	TBP
	TCF12
	TEAD4
	TRIM28
	UBTF
	USF1
	WHSC1
	WRNIP1
	YY1
	ZBTB33
	ZBTB7A
	ZC3H11A
	ZKSCAN1
	ZMIZ1
	ZNF143
	ZNF263
	ZNF274
	ZNF384

## Sheet: NMNAT3
74 associations	ARID3A		https://maayanlab.cloud/Harmonizome/gene/NMNAT3
	ATF3
	BACH1
	BHLHE40
	CBX3
	CCNT2
	CHD1
	CHD2
	CHD4
	CHD7
	CTCF
	CTCFL
	E2F6
	EBF1
	EGR1
	ELF1
	EP300
	ETS1
	EZH2
	GATA1
	GATA2
	GTF2F1
	GTF3C2
	H2AFZ
	HCFC1
	HDAC1
	HDAC2
	HDAC6
	HMGN3
	IRF1
	JUN
	JUND
	KDM1A
	KDM4A
	KDM5B
	MAFF
	MAFK
	MAX
	MAZ
	MXI1
	MYC
	MYOG
	NELFE
	NR2F2
	PHF8
	PML
	POLR2A
	RAD21
	RBBP5
	RCOR1
	REST
	RFX5
	RNF2
	SAP30
	SIN3A
	SIRT6
	SMARCB1
	SMC3
	SPI1
	TAF1
	TBL1XR1
	TBP
	TCF12
	TCF3
	TEAD4
	UBTF
	USF1
	USF2
	YY1
	ZBTB7A
	ZC3H11A
	ZMIZ1
	ZNF143
	ZNF384

## Sheet: NMNAT2
53 associations	ATF2		https://maayanlab.cloud/Harmonizome/gene/NMNAT2
	BACH1
	BCL3
	BHLHE40
	CEBPB
	CHD1
	CHD2
	CHD7
	CREB1
	CTCF
	E2F6
	EGR1
	EP300
	EZH2
	GABPA
	GATA2
	GATA3
	GTF2F1
	H2AFZ
	HDAC2
	HDAC6
	JUN
	JUND
	KDM4A
	KDM5A
	KDM5B
	MAX
	MAZ
	MXI1
	MYC
	MYOG
	PHF8
	POLR2A
	RAD21
	RBBP5
	RCOR1
	REST
	SAP30
	SIN3A
	SMC3
	SP4
	SUZ12
	TAF1
	TAL1
	TBP
	TCF12
	TCF7L2
	TEAD4
	USF1
	USF2
	YY1
	ZNF143
	ZNF263

## Sheet: Venn_NMNAT1vsWRN
Names	total	elements
NMNAT1 WRN	104	WRNIP1
		KDM4A
		SIN3A
		YY1
		ZNF143
		FOS
		NELFE
		ZNF263
		ZC3H11A
		REST
		SETDB1
		SAP30
		BACH1
		UBTF
		ZKSCAN1
		ARID3A
		KDM5B
		MAFK
		CEBPD
		EP300
		JUND				%	NMNAT1	24.6575
		CTBP2					shared	71.2329
		FOXP2					WRN	4.10959
		HMGN3
		TBP
		CBX3
		TBL1XR1
		RFX5
		RCOR1
		PML
		CEBPB
		NFIC
		IRF1
		MYC
		TAL1
		JUN
		MAX
		IRF3
		ZNF384
		RBBP5
		H2AFZ
		CCNT2
		CHD1
		KAT2A
		KDM5A
		HDAC2
		MYOG
		ATF1
		BRCA1
		ETS1
		TCF12
		ELK1
		ZMIZ1
		RUNX3
		SP4
		PAX5
		GTF2B
		POU2F2
		MAFF
		STAT3
		CTCF
		CHD7
		MTA3
		NFYB
		SMC3
		E2F6
		SRF
		MAZ
		STAT1
		MYBL2
		BHLHE40
		SIX5
		GABPA
		ATF3
		CUX1
		TRIM28
		HDAC1
		WHSC1
		STAT5A
		RAD21
		EGR1
		SIRT6
		BCLAF1
		HCFC1
		NFYA
		ELF1
		BCL3
		NR2F2
		SP1
		ZBTB33
		GTF2F1
		HDAC6
		MXI1
		USF1
		TAF1
		TEAD4
		POLR2A
		CHD2
		EZH2
		PHF8
		NRF1
		E2F4
		ZBTB7A
		CREB1
NMNAT1	36	IRF4
		FLI1
		TCF3
		SMARCB1
		KDM1A
		FOSL2
		ATF2
		TFAP2C
		ZEB1
		USF2
		THAP1
		GATA3
		TCF7L2
		NANOG
		SP2
		TAF7
		GTF3C2
		HNF4A
		SUZ12
		MBD4
		CHD4
		RELA
		NFATC1
		PBX3
		SPI1
		BATF
		KAT2B
		ELK4
		ZNF217
		TFAP2A
		EBF1
		FOXM1
		HNF4G
		NR3C1
		SUPT20H
		BCL11A
WRN	6	FOXA2
		GATA2
		ZNF274
		GATA1
		FOXA1
		MYB

## Sheet: Venn_NMNAT2vsWRN
Names	total	elements
NMNAT2 WRN	48	KDM4A
		SIN3A
		YY1
		TCF12
		GATA2
		ZNF143
		ZNF263
		SP4
		REST
		CTCF
		SAP30
		BACH1
		CHD7
		SMC3
		KDM5B
		E2F6
		MAZ
		BHLHE40
		EP300
		GABPA
		JUND
		TBP
		RAD21			%	NMNAT2	4.34783
		EGR1				shared	41.7391
		RCOR1				WRN	53.913
		CEBPB
		BCL3
		MYC
		GTF2F1
		MXI1
		HDAC6
		USF1
		TAF1
		JUN
		TAL1
		TEAD4
		MAX
		H2AFZ
		RBBP5
		POLR2A
		EZH2
		CHD2
		PHF8
		CHD1
		KDM5A
		HDAC2
		MYOG
		CREB1
NMNAT2	5	SUZ12
		ATF2
		USF2
		GATA3
		TCF7L2
WRN	62	FOXA2
		ATF1
		WRNIP1
		BRCA1
		ETS1
		ELK1
		ZMIZ1
		FOS
		RUNX3
		NELFE
		PAX5
		ZC3H11A
		GTF2B
		POU2F2
		MAFF
		STAT3
		SETDB1
		UBTF
		ZKSCAN1
		MTA3
		ARID3A
		NFYB
		MAFK
		SRF
		STAT1
		MYBL2
		CEBPD
		SIX5
		ZNF274
		ATF3
		CTBP2
		FOXP2
		CUX1
		HMGN3
		TRIM28
		HDAC1
		CBX3
		TBL1XR1
		WHSC1
		STAT5A
		RFX5
		SIRT6
		BCLAF1
		PML
		NFYA
		HCFC1
		ELF1
		NR2F2
		SP1
		NFIC
		ZBTB33
		IRF1
		GATA1
		IRF3
		ZNF384
		CCNT2
		NRF1
		KAT2A
		E2F4
		ZBTB7A
		FOXA1
		MYB

## Sheet: Venn_NMNAT3vsWRN
Names	total	elements
NMNAT3 WRN	64	KDM4A
		SIN3A
		YY1
		ETS1
		TCF12
		GATA2
		ZNF143
		ZMIZ1
		NELFE
		ZC3H11A
		REST
		MAFF
		CTCF
		SAP30
		BACH1
		UBTF
		CHD7
		ARID3A
		SMC3
		KDM5B
		MAFK				%	NMNAT3	8.33333
		E2F6					shared	53.3333
		MAZ					WRN	38.3333
		BHLHE40
		EP300
		JUND
		ATF3
		HMGN3
		HDAC1
		TBP
		CBX3
		TBL1XR1
		RAD21
		RFX5
		EGR1
		SIRT6
		RCOR1
		HCFC1
		PML
		ELF1
		NR2F2
		GATA1
		IRF1
		MYC
		GTF2F1
		USF1
		HDAC6
		MXI1
		TAF1
		TEAD4
		JUN
		MAX
		ZNF384
		H2AFZ
		RBBP5
		CCNT2
		POLR2A
		EZH2
		CHD2
		PHF8
		CHD1
		ZBTB7A
		HDAC2
		MYOG
NMNAT3	10	GTF3C2
		TCF3
		SMARCB1
		KDM1A
		CHD4
		CTCFL
		SPI1
		USF2
		EBF1
		RNF2
WRN	46	FOXA2
		ATF1
		WRNIP1
		BRCA1
		ELK1
		FOS
		RUNX3
		ZNF263
		SP4
		PAX5
		GTF2B
		POU2F2
		STAT3
		SETDB1
		ZKSCAN1
		MTA3
		NFYB
		SRF
		STAT1
		MYBL2
		CEBPD
		SIX5
		GABPA
		ZNF274
		CTBP2
		FOXP2
		CUX1
		TRIM28
		WHSC1
		STAT5A
		BCLAF1
		NFYA
		CEBPB
		BCL3
		SP1
		NFIC
		ZBTB33
		TAL1
		IRF3
		NRF1
		KAT2A
		E2F4
		KDM5A
		FOXA1
		MYB
		CREB1

## Sheet: Venn_all_NMNATs
Names	total	elements
NMNAT1 NMNAT2 NMNAT3	40	KDM4A
		SIN3A
		YY1
		ZNF143
		REST
		SAP30
		BACH1
		KDM5B
		EP300
		JUND
		TBP
		RCOR1
		USF2
		MYC
		JUN
		MAX
		RBBP5
		H2AFZ
		CHD1
		HDAC2
		MYOG
		TCF12
		CTCF
		CHD7
		SMC3
		E2F6
		MAZ
		BHLHE40
		RAD21
		EGR1
		GTF2F1
		HDAC6
		MXI1
		USF1
		TAF1
		TEAD4
		POLR2A
		CHD2
		EZH2
		PHF8
NMNAT1 NMNAT2	12	ZNF263
		ATF2
		CEBPB
		TAL1
		GATA3
		TCF7L2
		KDM5A
		SP4
		SUZ12
		GABPA
		BCL3
		CREB1
NMNAT1 NMNAT3	30	NELFE
		ZC3H11A
		TCF3
		SMARCB1
		KDM1A
		UBTF
		ARID3A
		MAFK
		HMGN3
		CBX3
		TBL1XR1
		RFX5
		PML
		IRF1
		ZNF384
		CCNT2
		ETS1
		GTF3C2
		ZMIZ1
		MAFF
		CHD4
		ATF3
		SPI1
		HDAC1
		SIRT6
		HCFC1
		ELF1
		NR2F2
		EBF1
		ZBTB7A
NMNAT2 NMNAT3	1	GATA2
NMNAT1	58	WRNIP1
		IRF4
		FOS
		FLI1
		SETDB1
		ZKSCAN1
		FOSL2
		CEBPD
		TFAP2C
		CTBP2
		FOXP2
		ZEB1
		NFIC
		IRF3
		THAP1
		NANOG
		SP2
		KAT2A
		TAF7
		ATF1
		BRCA1
		ELK1
		RUNX3
		PAX5
		GTF2B
		POU2F2
		STAT3
		HNF4A
		MBD4
		RELA
		MTA3
		NFATC1
		NFYB
		SRF
		STAT1
		MYBL2
		SIX5
		PBX3
		CUX1
		TRIM28
		WHSC1
		STAT5A
		BATF
		KAT2B
		BCLAF1
		ELK4
		NFYA
		ZNF217
		SP1
		ZBTB33
		TFAP2A
		FOXM1
		HNF4G
		NRF1
		E2F4
		NR3C1
		SUPT20H
		BCL11A
NMNAT3	3	CTCFL
		GATA1
		RNF2

## Sheet: Venn_1_3_WRN
Names	total	elements
NMNAT1 NMNAT3 WRN	62	KDM4A
		SIN3A
		YY1
		ZNF143
		NELFE
		ZC3H11A
		REST
		SAP30
		BACH1
		UBTF
		ARID3A
		KDM5B
		MAFK
		EP300
		JUND
		HMGN3
		TBP
		CBX3
		TBL1XR1
		RFX5
		RCOR1
		PML
		IRF1
		MYC
		JUN
		MAX
		ZNF384
		RBBP5
		H2AFZ
		CCNT2
		CHD1
		HDAC2
		MYOG
		ETS1
		TCF12
		ZMIZ1
		MAFF
		CTCF
		CHD7
		SMC3
		E2F6
		MAZ
		BHLHE40
		ATF3
		HDAC1
		RAD21
		EGR1
		SIRT6
		HCFC1
		ELF1
		NR2F2
		GTF2F1
		HDAC6
		MXI1
		USF1
		TAF1
		TEAD4
		POLR2A
		CHD2
		EZH2
		PHF8
		ZBTB7A
NMNAT1 NMNAT3	8	TCF3
		SMARCB1
		KDM1A
		USF2
		GTF3C2
		CHD4
		SPI1
		EBF1
NMNAT1 WRN	42	WRNIP1
		FOS
		ZNF263
		SETDB1
		ZKSCAN1
		CEBPD
		CTBP2
		FOXP2
		CEBPB
		NFIC
		TAL1
		IRF3
		KAT2A
		KDM5A
		ATF1
		BRCA1
		ELK1
		RUNX3
		SP4
		PAX5
		GTF2B
		POU2F2
		STAT3
		MTA3
		NFYB
		SRF
		STAT1
		MYBL2
		SIX5
		GABPA
		CUX1
		TRIM28
		WHSC1
		STAT5A
		BCLAF1
		NFYA
		BCL3
		SP1
		ZBTB33
		NRF1
		E2F4
		CREB1
NMNAT3 WRN	2	GATA2
		GATA1
NMNAT1	28	IRF4
		FLI1
		FOSL2
		ATF2
		TFAP2C
		ZEB1
		THAP1
		GATA3
		TCF7L2
		NANOG
		SP2
		TAF7
		HNF4A
		SUZ12
		MBD4
		RELA
		NFATC1
		PBX3
		BATF
		KAT2B
		ELK4
		ZNF217
		TFAP2A
		FOXM1
		HNF4G
		NR3C1
		SUPT20H
		BCL11A
NMNAT3	2	CTCFL
		RNF2
WRN	4	FOXA2
		ZNF274
		FOXA1
		MYB

## Sheet: Venn_all
Names	total	elements
NMNAT1 NMNAT2 NMNAT3 WRN	39	KDM4A
		SIN3A
		YY1
		ZNF143
		REST
		SAP30
		BACH1
		KDM5B
		EP300
		JUND
		TBP
		RCOR1
		MYC
		JUN
		MAX
		RBBP5
		H2AFZ
		CHD1
		HDAC2
		MYOG
		TCF12
		CTCF
		CHD7
		SMC3
		E2F6
		MAZ
		BHLHE40
		RAD21
		EGR1
		GTF2F1
		HDAC6
		MXI1
		USF1
		TAF1
		TEAD4
		POLR2A
		CHD2
		EZH2
		PHF8
NMNAT1 NMNAT2 NMNAT3	1	USF2
NMNAT1 NMNAT2 WRN	8	ZNF263
		CEBPB
		TAL1
		KDM5A
		SP4
		GABPA
		BCL3
		CREB1
NMNAT1 NMNAT3 WRN	23	NELFE
		ZC3H11A
		UBTF
		ARID3A
		MAFK
		HMGN3
		CBX3
		TBL1XR1
		RFX5
		PML
		IRF1
		ZNF384
		CCNT2
		ETS1
		ZMIZ1
		MAFF
		ATF3
		HDAC1
		SIRT6
		HCFC1
		ELF1
		NR2F2
		ZBTB7A
NMNAT2 NMNAT3 WRN	1	GATA2
NMNAT1 NMNAT2	4	ATF2
		GATA3
		TCF7L2
		SUZ12
NMNAT1 NMNAT3	7	TCF3
		SMARCB1
		KDM1A
		GTF3C2
		CHD4
		SPI1
		EBF1
NMNAT1 WRN	34	WRNIP1
		FOS
		SETDB1
		ZKSCAN1
		CEBPD
		CTBP2
		FOXP2
		NFIC
		IRF3
		KAT2A
		ATF1
		BRCA1
		ELK1
		RUNX3
		PAX5
		GTF2B
		POU2F2
		STAT3
		MTA3
		NFYB
		SRF
		STAT1
		MYBL2
		SIX5
		CUX1
		TRIM28
		WHSC1
		STAT5A
		BCLAF1
		NFYA
		SP1
		ZBTB33
		NRF1
		E2F4
NMNAT3 WRN	1	GATA1
NMNAT1	24	IRF4
		FLI1
		FOSL2
		TFAP2C
		ZEB1
		THAP1
		NANOG
		SP2
		TAF7
		HNF4A
		MBD4
		RELA
		NFATC1
		PBX3
		BATF
		KAT2B
		ELK4
		ZNF217
		TFAP2A
		FOXM1
		HNF4G
		NR3C1
		SUPT20H
		BCL11A
NMNAT3	2	CTCFL
		RNF2
WRN	4	FOXA2
		ZNF274
		FOXA1
		MYB
